# Supplementary material for: A vascularized human lung-on-a-chip reveals compartmentalized inflammatory responses in bacterial pneumonia
Source: Research Square preprint supplement (doi:10.21203/rs.3.rs-3343362/v1), 2024-09-20
Supplement: Supplementary file 1 [file 6e95d72e6724ee0557653513.xlsx]

## Sheet: Sheet1
Table S1 - Rank gene expression from primary passage 0 endothelial cells from publicly available data sources. Ranks determined within each cell type and with house keeping genes excluded.
Gene	HBMEC	HLMEC	LSEC	HUVEC
Cldn5	1056.86	9670.19	999.645	256.543
CD31	547.878	8887.48	1102.98	891.392
ESAM	1227.44	4239.23	1396.82	232.988
RAMP2	2351.05	4499.9	539.402	158.486
Cdh5	449.444	5559.27	818.897	355.763
ADGRF5 (Gpr116)	943.098	2447.97	630.066	120.011
PTRF	266.584	4987.46	561.644	385.59
S1PR1	885.538	2635.67	331.303	136.684
CD34	1076.51	3371.35	148.471	453.665
CAV1	568.15	5296.24	167.613	557.153
ITGB1	402.555	1198.82	484.435	556.827
Clec14A	189.04	3759.56	480.366	427.157
TSPAN7	736.712	1568.39	1102.43	61.5635
VWF	384.425	4207.92	158.22	749.838
TIE1	293.77	1213.08	502.477	276.944
EDN1	2187.97	726.418	271.6	224.959
MCL1	2015.48	672.184	973.174	89.5496
FCGRT (FcRN)	122.062	1527.24	1327.07	715.978
ROBO4	247.878	1028.86	606.77	132.809
ICAM2	501.442	595.832	336.592	236.666
CTNNA1	384.775	996.862	203.308	156.105
CCL2	118.665	1259.31	495.819	344.12
IFI16	238.525	1570.58	184.476	152.502
FN1	2680.68	1319.91	48.9377	420.014
IL32	304.936	941.397	206.498	137.503
KDR	560.857	1603.89	259.503	30.8737
ADGRL4 (Eltd1)	410.647	756.278	272.998	84.3585
TRAM1	326.288	1074.1	178.254	124.457
CXCL2	1494.44	210.105	1124.46	66.7799
Hes1	229.501	879.583	1799.62	39.6967
MCAM	94.759	858.576	460.24	390.812
ICAM1	671.158	618.745	157.236	87.3163
Calcrl	168.15	3475.72	139.842	79.3505
MMRN2	75.4017	1305.37	388.859	158.577
PAI1	282.921	685.894	79.3231	849.015
ERG	636.588	731.87	184.134	33.9123
EFNA1 (EC spec)	238.558	742.731	152.161	119.539
TIE2 (tek)	180.635	892.494	178.317	53.5486
LAMB2	108.591	1553.08	226.954	58.3044
ITGA5	62.6288	837.269	323.976	366.885
ALDh1a1	173.259	138.714	349.672	989.899
TNFSF10 (TRAIL)	516.16	7863.63	34.8083	137.571
SCARB2	462.419	485.55	95.5977	109.6
CTNNB1	891.22	491.323	90.5583	48.0827
KLF4 (liver)	1452.49	1028.4	1200.24	4.78651
Flt1	2957.97	1071.53	158.001	9.50286
ADGRL2 (LPHH1,LPHN2)	334.569	1283.32	113.99	20.0368
Col4A1	44.9938	1981.59	144.286	249.048
KLF2 (lung)	34.5447	1660.89	1474.24	38.843
IL33	25.5047	1294.45	801.796	117.247
PDGFB	79.5426	482.285	290.242	94.4193
BMP6	128.719	146.622	207.4	162.012
EFNB2 (lung EC)	114.854	1136.12	172.557	20.9255
SLC2A3	789.275	260.199	242.142	13.4218
CASP4	162.052	310.128	117.902	65.1193
ITGA6	839.308	575.562	103.55	13.5431
PROCR	78.1623	281.687	154.861	157.038
CLEC2b	329.372	543.357	206.421	9.20977
THBD	133.663	2045.5	58.1226	22.5214
TJP1 (ZO1)	2262.51	1497.22	40.7201	11.6348
Col4A2	15.3276	2299.09	138.44	245.495
ISG15	27.6452	753.653	269.076	68.0582
C1Q1R (CD93)	49.0317	1651.36	55.7127	130.014
Nfib (liver)	253.257	883.66	80.7329	13.1452
LSm14A	267.408	410.496	67.0232	26.2529
TMEM173 (STING)	108.117	798.826	95.4462	25.561
LAMA4	173.383	229.904	86.4281	51.36
FZD4	115.492	774.264	68.3435	37.3103
JAM2	1328.8	944.879	118.9	3.92251
CLEC3b (EC-specif)	25.48	776.264	1821.92	19.0469
LRRFIP1	95.6531	1371.76	70.4815	20.5025
TRAILR2 (TNFRSF10B, DR5, human only)	110.651	90.7613	202.097	85.7484
Gpr177 (Wls)	283.601	153.495	73.6376	44.4743
TSPAN12	80.8282	1124.41	55.9888	38.4829
EFNB1 (lung ec)	17.8101	871.806	352.389	26.9884
CLEC1a (EC specific)	130.202	366.728	88.5117	19.9626
CD58	125.093	605.944	312.9	5.5378
DHX9	159.621	236.343	54.8982	45.9238
AQP1	7.02513	6146.31	67.2583	745.496
F11R (JAM1)	106.263	296.113	60.1262	58.4339
ITGB5	75.9786	188.386	115.702	51.1834
OAS1	477.178	201.509	94.5369	9.21986
MX1	769.839	416.464	33.8419	14.7893
THBS1 (TSP-1)	41.2237	74.7725	150.443	1495.78
EPHB4 (EC specific)	5.02266	712.473	244.49	124.418
ADGRG1 (GPr56)	111.454	353.064	125.25	10.4004
JAM3	82.9584	476.565	45.1949	35.7877
CD36	23.4858	2997.06	166.903	10.7061
GJA4	76.6378	468.625	86.6193	17.564
DDX41	57.3136	166.872	169.296	28.4654
ANGPT2	117.429	106.683	70.5011	49.7545
EPHA2 (pericyte)	30.6778	148.568	237.112	45.4413
Sox17 (liver)	147.301	358.73	87.2121	8.80032
ITGAV (CD51)	105.48	191.062	61.2507	45.3277
ITGA1	330.037	1090.08	40.4151	5.79976
IRF3	63.9061	117.029	194.11	26.56
SCARB1	393.931	145.869	64.0853	13.2416
ADGRG6 (GPR126)	15.6984	269.608	147.25	111.04
CARD16 (human only)	56.473	687.938	53.027	26.5351
MMRN1	2.18377	175.776	596.177	1558.65
TJP2 (ZO2)	69.1801	411.353	37.5168	71.2087
IRF9	328.183	27.0605	182.304	18.5232
ACKR1 (DARC)	35.5336	3520.15	73.3206	11.3693
NOTCH4	9.74454	1874.92	855.243	7.43147
ACKR3 (CXCR7)	28.8133	185.192	146.204	40.524
EDNRB	144.953	3272.49	46.4008	3.99352
DLL4	17.7173	539.229	205.298	15.7018
CARD8	62.7524	337.179	99.7332	12.2324
ARHGEF15	35.9703	633.212	141.483	11.4665
Col1A2	94.52	200.569	27.0248	226.899
MCT1 (SLC16A1)	698.393	84.2287	26.4883	49.1582
FZD6	143.288	137.196	44.3696	21.2028
CAT1 (SLC7A1)	645.241	14.9184	107.428	19.7442
TRAM2	42.9419	244.886	63.6591	33.0233
CASP1	87.6391	252.977	87.1488	11.0284
BMP4	9.43552	109.613	182.109	166.807
Gpr4	79.9341	312.908	120.53	6.18796
CXCL8	2084.05	31.2416	57.6152	13.1201
CX3CL1	213.02	801.445	39.5412	4.39671
DHX36	58.0964	224.518	82.6248	14.3066
GPR146 (GPR8, C-peptide-R)	219.701	89.0654	27.6522	45.5537
LAMC1	119.613	135.904	24.9461	86.4868
PAR1 F2R	6.81912	205.449	145.958	114.946
CASP7	91.0466	253.134	46.1384	14.2203
IFIH1 (MDA5)	265.361	192.106	39.4758	9.35177
TGFB1	8.94108	172.816	111.006	113.25
NOTCH1	12.7524	439.29	83.1922	23.306
TfRC	900.7	44.7552	28.8913	25.1367
VCAM1	62.6288	272.277	43.0912	16.6542
F8	67.9852	301.662	230.168	2.98505
CASP10	202.143	113.299	40.7267	10.3606
JAG1	75.8138	278.432	41.1715	12.0897
DCN (Decorin)	2566.3	294.066	8.74028	11.7772
NLRP1	40	281.784	158.246	4.8487
SCARA4 (COLEC12)	869.963	24.7792	39.5118	16.4405
RIPK1	86.6893	102.76	69.323	11.5341
ADGRA2 (Gpr124)	178.026	53.4955	22.8639	56.0762
ADGRA2 (Gpr124)	178.039	53.2948	22.8623	56.0762
CARD6	114.133	199.261	32.7202	12.2301
CASP2	89.452	76.7561	77.8795	11.6099
IL-6	793.572	60.8208	36.6818	8.28919
IRF1	36.609	972.043	34.2203	10.3276
EIF2AK2 (PKR)	169.798	343.641	20.7404	9.09743
MyD88	109.6	221.06	37.2167	9.0791
Bcl10	51.5039	104.516	41.4385	23.9979
SLC5A6	583.024	44.4575	34.0317	11.7668
CD40	13.3375	411.219	48.2546	18.9943
SLC2A1 GLUT1	3269.88	68.2566	15.5841	14.8693
SELE	201.895	105.198	42.4472	4.70758
LAT1 (SLC7A5)	930.738	3.91022	50.6554	13.7538
TRIM5	101.009	107.921	31.1811	15.4429
ACE	13.0202	1454.34	16.7941	45.7263
SMAD6	3.33951	1500.13	162.167	4.43062
ZC3HAV1 (ZAP)	179.707	304.599	17.9914	7.41714
DDX58 (RIG-I)	154.1	298.077	20.4531	6.87707
SLC1A5	5.56036	93.27	80.317	60.1109
DLL1	15.6572	87.7174	90.7155	16.2339
NOD1	34.0606	76.1105	93.922	10.5843
LAMB1	6.43593	87.3829	43.2628	199.423
BCRP (ABCG2)	1981.95	54.3551	29.6013	4.332
CARD10 (ec sp?)	1.63576	237.955	81.5268	21.4116
LY96 (MD2)	17.3506	27.1274	84.0735	35.8274
ALCAM	65.307	72.9864	26.4582	25.3381
CD44	117.651	141.424	23.7575	7.64662
XPNPEP1	3.50227	152.729	81.6767	20.269
CASP3	46.1475	76.1339	39.5225	14.2608
MAVS	24.3696	310.058	40.4893	5.99184
TLR4	61.3927	142.293	43.7538	4.77999
eNOS (NOS3)	20.1895	78.2379	45.0983	16.064
ADGRE5 (CD97)	97.4042	580.897	29.6286	2.14277
CXCL12	450.762	228.696	12.5314	3.98434
ITGAE (CD103)	3.25505	87.2659	74.4759	28.339
SCARA3	28.0181	22.595	27.5596	128.914
KIT	23.6506	876	40.1966	2.93903
RIPK2	108.076	65.2663	23.6489	11.1244
TRADD	18.7268	121.22	35.0254	12.527
CASP6	14.9979	58.6466	43.5533	19.4347
ACKR5 (CCRL2)	97.9398	231.59	12.6434	7.90949
MRP1 (ABCC1)	2.84302	105.64	52.3484	24.742
IRF7	c	165.045	41.3598	6.34377
EPHA4 (EC-specific =/- astro?)	191.04	61.9949	28.2152	3.46034
ITGA2	22.4557	76.6223	30.7209	13.8129
BMP2	6.79852	178.358	30.5535	19.5788
PYCARD (ASC)	14.2748	49.1705	43.3503	17.8565
CLEC16a	40.6263	67.3267	43.1573	5.49425
PDGFA	57.0787	27.967	37.4144	10.9366
SELP	1.43799e-07	484.011	69.0088	27.8803
CD14	31.9736	1042.6	168.206	0
JAG2	0.824063	276.893	38.4762	13.5227
CXCR4	60.033	14.3464	20.3823	30.1191
CCL23	1.43799e-07	648.368	317.004	5.35887
SLC16A2 (MCT lactate transporters)	256.489	55.9005	20.0167	3.58556
CCL14	17.1817	9.58657	37378.7	2.8285
SLC5A3	61.8459	9.61333	14.9995	68.5236
SLC1A1 (EEAT glutamate transporters)	110.941	49.3344	26.2627	4.13014
ITGA10	28.3478	406.794	18.7807	4.09535
CD274 (PDL1, B7-H)	16.9695	118.949	27.8116	7.56881
DHX58 (LGP2)	19.4891	72.1401	41.5007	4.94755
NOD5 (NLRC5)	23.255	193.805	35.1504	3.29764
Cldn11	4.77956	107.707	11.4091	138.141
TIFA	100.33	35.3024	16.6228	8.11908
TLR3	48.9905	103.516	19.0778	4.9447
LAMA5	1.43799e-07	1290.85	60.9798	7.87452
clec2d	13.0202	7.98435	36.1178	29.5624
TICAM1 (TRIF)	12.9378	79.4053	27.5976	9.12133
SLC2A6	19.6127	97.8291	25.3604	5.51831
CXCL1	929.543	19.7117	0	28.4668
FOXF1	144.845	1704.34	0	3.36966
PLA2G12A	23.4858	73.1068	26.5975	4.67471
ITGA3	1.43799e-07	794.22	21.6821	32.6175
col3A1	12.3321	303.251	0	143.679
ACKR4 (CCRL1, CCR11)	9.59621	20.3171	24.5464	22.7715
F3 (TF)	108.241	9.22531	21.8369	4.96849
ABCA1	53.9761	24.2708	30.0382	3.86809
LRP1	22.7853	61.1654	34.817	3.56012
APOBEC3G	50.6778	39.7444	34.3156	2.67502
Col1A1	1.43799e-07	133.476	22.1716	430.452
SLC2A8	5.52122	85.2054	30.4255	7.58181
PAR3 (F2RL2)	135.146	204.275	34.1617	0
ITGB8	26.37	1.33797	122.119	4.26257
LUM (Lumican)	156.984	118.922	0	10.1283
SLC16A3	1.43799e-07	26.7695	75.2984	54.9652
Gprc5a	4.86197	22.1969	23.3233	22.1251
ADGRL1 (LPHN1)	45.3234	76.1808	18.2211	3.28403
GPRC5C	21.302	12.1354	66.9436	2.67079
CD276 (B7-H3)	4.20272	10.9145	33.7364	19.9681
ADGRA3 (Gpr125)	11.7429	15.5171	27.535	11.1296
SLC16A14	104.388	36.5266	17.7647	2.29046
CRADD	15.4512	72.7689	14.6473	8.02436
CLEC4E (MINCLE)	61.8995	191.758	43.4172	0
ABCB1	757.726	237.61	9.27908	0
PDGFC	62.5752	6.827	22.2843	4.34236
SLC2A10	2.14668	83.834	24.317	6.95537
ALPK1	4.36753	16.8584	20.1613	20.1851
CASP9	9.68274	44.6916	22.563	4.56098
CXCR2	1.43799e-07	0.0769334	473.499	71.3047
POLR3A (RNApolIII subunit a)	16.1393	47.4177	17.5986	4.37606
AXIN2	93.7783	42.8084	9.36647	2.07894
MRC2 (CD280, CLEC13E)	7.49897	22.1401	10.4619	16.9459
CELSR1 (ADGFRC1)	16.2752	21.7119	14.8857	5.74042
HLA-DP	0.618047	0	227.641	17.1131
SLC1A4	42.7441	11.1353	18.4377	3.49769
SLC16A13	28.0923	22.6084	15.8138	3.63382
SLC16A6	66.7903	0.702435	19.2622	6.19506
EFNA4 (astro)	8.94108	10.5332	19.2894	9.8338
NOTCH2	40.1319	20.7386	10.1403	3.96505
MRP4 (ABCC4)	9.47672	104.288	14.118	3.2541
CCL4	201.483	1.76612	84.5478	0
CXCL10	1.77173	78.8199	10.0116	7.58621
PDGFRB	377.833	37.9984	0	3.36927
N-cadherin (Cdh2)	113.103	0	15.0437	13.6895
CASP8	3.87309	64.4233	29.4405	1.54826
Cldn12	9.72394	21.1199	21.0968	3.84601
SELL	16.234	26.4751	16.9051	3.46888
SLC16A4 (ec -specific)	281.364	5.14785	0	8.47893
MRE11a	8.94932	98.2372	15.049	1.85247
SLC2A13	15.9168	32.1648	19.1089	2.55236
AQP3	1.43799e-07	8.9711	75.1555	13.0732
PTGER4	8.28183	3.30813	27.2474	5.48351
RNASEL	12.0725	50.5787	12.7772	3.21826
LAMC2	1.43799e-07	1.37142	124.841	17.668
KITLG	48.4961	219.882	0	3.03804
TNFSF15 (VEGI)	1.43799e-07	1.77616	251.267	8.46108
TGFB2	46.1475	51.9869	0	7.94269
AGER	1.43799e-07	36.2022	78.5363	3.98516
EFNA5 (astro / fib)	8.52493	11.4865	13.275	4.98255
CCL16	1.43799e-07	2.94019	269.271	4.41469
SLC16A12	1.43799e-07	0.608777	65.2323	33.5647
ITGAX (CD11c)	1.43799e-07	1.92668	23.2152	269.626
KHDRBS2 (lung)	77.5113	89.8515	15.905	0
CD68	7.65142	0.0301044	34.0312	9.08479
PROM1	137.618	4.9505	0	6.58662
RIPK3	2.5958	30.5058	17.3581	3.69244
cGAS (Mb21d1)	2.49279	59.8341	9.63395	3.89185
SLC16A5	1.43799e-07	45.7486	39.6506	4.87936
LAMA2	174.289	19.8622	0	2.81648
CSF1R	75.6902	6.7969	39.9296	0
MFRP	22.0148	0.582018	460.491	0
HLA-DR	102.819	0	319.333	0
SLC1A2	1324.09	0	49.9761	0
ITGB3	2.06016	1.77281	9.26543	20.4834
SFRP1	5.2328	17.5743	19.3064	2.61678
DPP4	1.43799e-07	10.1351	21.3271	21.4253
COLEC11 (Liver specific)	1.60692	18.7952	199.41	0
SLC2A12	64.108	73.5884	11.5108	0
TLR1	11.0836	5.86366	10.2245	3.6808
NLRP3	5.80964	1.96682	291.597	0
TRAILR1 (TNFRSF10A, DR4)	4.98558	77.1408	0	7.81602
CXCL9	9.19654	15.8282	54.0476	0
EFNA3 (brain EC)	4.18624	2.07051	15.4766	4.88863
SLC1A3	725.723	2.1742	8.69947	0
LPAR1	166.296	4.33168	0	1.89928
Ocln	186.218	142.414	0	0
PPARGC1B	14.6065	135.406	12.6587	0
IL18	5.78904	1.62564	20.5033	2.99917
MFSD2A	1586.73	0.22411	12.6161	0
IL1B	161.599	2.41504	16.1123	0
GPER1 (Gpr30)	80.4285	310.098	0	0
ACKR2 (CCbp2)	9.59621	9.98461	45.03	0
CCL3	25.5459	0.909821	52.8218	0
ANGPT1	3.1644	15.0723	7.79789	2.26968
CCM2L	110.878	169.494	0	0
NOTCH3	9.70746	33.3857	0	4.51869
SLC2A4 (Astro)	34.314	3.06396	28.3505	0
ITGA9	8.77215	46.1132	22.3389	0
Myh11	64.6889	230.73	0	0
PTN	2060.36	11.6905	0	0
ARFGEF3	41.986	304.205	0	0
ITGA4	5.06799	65.0355	0	3.64407
PDGFRA	32.0148	30.2984	8.30147	0
LAMA3	53.9555	5.76666	0	2.52084
C5aR1	20.3543	2.83984	28.4544	0
NOD3 (NLRC3)	2.97899	21.2202	31.2703	0
ADGRL3 (Lphn3)	173.424	46.3741	0	0
PDGFD	1.43799e-07	10.6201	26.771	2.67282
CELSR2 (ADGFRC2)	14.7919	7.17822	0	4.1109
SLC2A11	1.43799e-07	6.09446	20.3653	4.37757
Ebf1 (liver lung)	238.896	22.6351	0	0
SCARA1 (MSR1)	27.7297	3.02382	20.2349	0
HLA-DQ	20.1758	0	110.517	0
TNFRSF25 (DR3)	1.3185	39.6909	0	4.36616
PAR4 (F2RL3)	1.43799e-07	508.463	20.6445	0
Bdkrb2	1.43799e-07	15.0622	20.6281	2.56869
ZNF185	11.6028	5.91049	0	3.59625
ITGB2	1.43799e-07	57.9676	47.2146	0
ITGA11	11.3721	4.616	0	3.51799
CCL22	1.43799e-07	1.52863	857.869	0
CLEC7A (Dectin1)	0.477956	4.67287	38.2249	0
SLC16A7	12.9254	4.77321	0	3.03375
ITGB4	1.43799e-07	157.279	0	4.30788
CIITA	1.43799e-07	50.0769	42.0218	0
HLA-DOB	25.958	0	40.7438	0
NCAM	112.196	16.544	0	0
EPHB1	2.96251	2.2779	0	6.88819
Cysltr1	67.2435	30.6964	0	0
Cldn1	19.2831	2.47525	12.1218	0
SLC2A9	1.03008	12.1923	0	3.55876
HLA-DM	1.43799e-07	0	40.7438	4.32788
CLEC1b	1.43799e-07	0.190661	800.389	0
FOXF2	45.3646	37.8311	0	0
ITGAM (CD11b)	3.29625	2.27455	26.2118	0
EDNRA	93.0614	10.5566	0	0
FAS (CD95)	37.6185	43.9457	0	0
TLR2	0.432633	10.7339	17.6494	0
NOD2	2.23733	18.8554	9.84463	0
NLRP12	1.43799e-07	2.7696	12.6437	2.79975
SLC17A7 vGlut2	122.196	2.36486	0	0
CD32 (FCGR2A)	1.43799e-07	34.1751	28.1185	0
F5	1.43799e-07	1.34466	108.196	0
ADGRF1 (GPR110)	1.43799e-07	0.117073	226.488	0
PLXNC1	4.48702	147.953	0	0
ADGRD1 (GPR133)	26.9221	23.8192	0	0
EPHA3	121.809	1.73267	0	0
ADGRE2 (EMR2)	5.85084	1.42159	15.9716	0
ADGRA1 (GPR123)	8.61145	0.568638	16.7458	0
MARCO	1.43799e-07	19.8889	29.2741	0
SCARA2 (MARCO)	1.43799e-07	19.8889	29.2741	0
PDPN	1.43799e-07	50.3077	20.2185	0
AQP4	258.838	0.0668986	0	0
CARD14	1.43799e-07	6.67313	39.6516	0
SLC5A10	1.43799e-07	0.21742	0	38.6281
CD86	5.19159	1.33128	14.1786	0
ITGA2B (GPIIb)	1.43799e-07	5.69307	39.0061	0
NG2 (CSPG4)	1.43799e-07	56.1948	0	2.56351
GFAP	175.113	0.0334493	0	0
EPHB2 (astro / lung PC fib)	1.43799e-07	0.675676	0	19.2305
CLEC12A (MICL)	1.43799e-07	1.59888	47.246	0
CASP12	15.7808	12.4799	0	0
COLEC10 (Liver, EC-specific)	1.43799e-07	68.7493	8.45024	0
Col4A4	13.4734	9.90768	0	0
FAP	1.43799e-07	2.6726	0	5.44165
TLR5	20.6016	3.55566	0	0
MRC1 (CD206)	1.36382	52.3816	0	0
OLR1 (LOX1, CLEC8A)	43.4405	1.15066	0	0
ITGA7	14.4211	7.1247	0	0
SLC16A10	54.7507	0.608777	0	0
CARD9	1.43799e-07	2.86995	22.1926	0
NCR3LG1 (B7-H6)	7.21055	9.83409	0	0
ADGRV1 (GPR98)	25.1339	1.01686	0	0
Col4A3	36.6296	0.287664	0	0
CLEC4A (DCIR)	1.43799e-07	2.54215	20.4972	0
SLC16A11	1.43799e-07	8.29542	13.2218	0
NLRP8	1.43799e-07	0	76.1044	0
F2RL1	1.43799e-07	0.351218	0	5.92539
PAR2 (F2RL1)	1.43799e-07	0.351218	0	5.92445
Cldn10	15.2452	1.96347	0	0
EPHA7	7.25175	5.38534	0	0
CD275 (ICOSLG, B7-H2)	1.3185	0	0	3.32539
ITGA8	5.76844	5.85363	0	0
SLC2A5	10.5748	2.32473	0	0
TBX15	38.4837	0.0301044	0	0
HAS1 (HA)	1.43799e-07	0.94996	0	3.72289
NOD4 (NLRC4, IPAF)	1.43799e-07	2.88333	14.9537	0
EFNB3	18.5435	0.391357	0	0
P2RY6	1.43799e-07	4.59593	11.5593	0
ADGRG3 (GPr97)	1.43799e-07	5.67969	9.50517	0
PPARGC1A	8.59497	2.02034	0	0
TNFSF4 (OX40L)	1.43799e-07	0.143832	0	4.46947
CELSR3 (ADGFRC3)	1.43799e-07	3.24124	10.5352	0
CLEC9A	0.910589	6.55272	0	0
CCR1	1.43799e-07	0.147177	22.4113	0
ITGAL (CD11a)	1.43799e-07	0.896441	17.3845	0
NLRP2	1.43799e-07	0.117073	0	4.00893
EPHB6	7.62052	1.35135	0	0
TNFA	1.43799e-07	1.97685	11.5161	0
TLR6	1.07128	4.60931	0	0
SLC1A7	7.91512	0.852957	0	0
LAMC3	0.988875	3.54897	0	0
LAMA1	0.494438	3.99719	0	0
CCL5	7.62258	0.628847	0	0
SCARA5	0.325505	4.43538	0	0
CARD19	28.9246	0	0	0
Cdh1	1.43799e-07	1.06369	8.82032	0
ITGB7	1.43799e-07	0.535189	12.0644	0
AIM2	0.206016	2.32138	0	0
CARD11	1.43799e-07	0	0	4.71327
LAMB3	1.43799e-07	0.0668986	0	2.49278
Lpar4	5.76844	0.194006	0	0
SLC16A9	1.00948	0.889751	0	0
CCL7	1.43799e-07	0	0	3.80686
EPHA6	13.5393	0	0	0
SLC2A2 GLUT2	1.43799e-07	0	19.9318	0
NLRP9	1.43799e-07	0	19.7475	0
HLA-DOA	1.43799e-07	0	19.0182	0
IL1A	0.412031	0.270939	0	0
TBX4	1.43799e-07	11.346	0	0
TICAM2 (TIRP, TMED7)	1.43799e-07	0	16.4077	0
SLC5A1 (SGLT1)	8.85867	0	0	0
WNT3	1.43799e-07	0	0	2.66566
SLITRK5	8.03461	0	0	0
HAS2 (HA)	1.43799e-07	7.43578	0	0
WNT5	1.43799e-07	7.25181	0	0
SLC16A8	1.43799e-07	6.14463	0	0
HCAR1 (GPR81, Lactate receptor)	5.52534	0	0	0
Hes5 (astrocyte)	1.43799e-07	3.91357	0	0
ITGB6	1.43799e-07	3.34493	0	0
SLC1A6	1.74495	0	0	0
P2ry10	1.60692	0	0	0
ADGRG2 (GPr64)	1.43799e-07	2.78967	0	0
EPHA5	0.842604	0	0	0
CTLA4	0.399671	0	0	0
TJP3 (ZO3)	1.43799e-07	1.73267	0	0
EPHA1 (peri)	1.43799e-07	1.7126	0	0
ADGRF3 (GPR113)	1.43799e-07	0.92989	0	0
CCL17	1.43799e-07	0.873026	0	0
Cldn3	1.43799e-07	0.869682	0	0
CCL8	1.43799e-07	0.829542	0	0
PtgeR2	1.43799e-07	0.695745	0	0
EPHB3 (astro)	1.43799e-07	0.43551	0	0
SLC5A2 (SGLT2)	1.43799e-07	0.431496	0	0
NLRP6	1.43799e-07	0.421461	0	0
ADGRE1 (EMR1)	1.43799e-07	0.388012	0	0
EPHA10	1.43799e-07	0.270939	0	0
ZBP1 (DAI)	1.43799e-07	0.194006	0	0
Glp1r	1.43799e-07	0.194006	0	0
FPR2	1.43799e-07	0.170591	0	0
CD80	1.43799e-07	0.167246	0	0
ADGRF2 (Gpr111)	1.43799e-07	0.153867	0	0
ADGRG5 (GPr114)	1.43799e-07	0.127107	0	0
col2A1	1.43799e-07	0.0769334	0	0
CASP5	1.43799e-07	0.0702435	0	0
LAMB4	1.43799e-07	0.0568638	0	0
EFNA2 (astro)	1.43799e-07	0	0	0
EPHA8	1.43799e-07	0	0	0
AQP2	1.43799e-07	0	0	0
TLR7	1.43799e-07	0	0	0
TLR8	1.43799e-07	0	0	0
TLR9	1.43799e-07	0	0	0
TLR10	1.43799e-07	0	0	0
NLRP4	1.43799e-07	0	0	0
NLRP5	1.43799e-07	0	0	0
NLRP7	1.43799e-07	0	0	0
NLRP10	1.43799e-07	0	0	0
NLRP11	1.43799e-07	0	0	0
NLRP13	1.43799e-07	0	0	0
NLRP14	1.43799e-07	0	0	0
CASP14	1.43799e-07	0	0	0
CARD17 (INCA)	1.43799e-07	0	0	0
CARD18	1.43799e-07	0	0	0
CLEC6A (Dectin2)	1.43799e-07	0	0	0
CLEC4D (Dectin3)	1.43799e-07	0	0	0
CLEC4C (BDCA2)	1.43799e-07	0	0	0
FASL (CD95L)	1.43799e-07	0	0	0
ITGAD (CD11d)	1.43799e-07	0	0	0
SLC2A7	1.43799e-07	0	0	0
SLC17A6 vGlut1	1.43799e-07	0	0	0
SLC17A8 vGlut3	1.43799e-07	0	0	0
CLCA1	1.43799e-07	0	0	0
CLCA2 CD26	1.43799e-07	0	0	0
HCAR2 (GPR109A, Hydroxy butyrate receptor, microglial cells)	1.43799e-07	0	0	0
ADGRE3 (EMR3)	1.43799e-07	0	0	0
ADGRE4P (GPR127, EMR4)	1.43799e-07	0	0	0
ADGRF4 (gpr115)	1.43799e-07	0	0	0
ADGRG4 (GPr112)	1.43799e-07	0	0	0
ADGRG7 (GPR128)	1.43799e-07	0	0	0
CD278 (ICOS)	0	0	0	0
ADGRD2 (GPR144)	0	0	0	0
