# Supplementary material for: A vascularized human lung-on-a-chip reveals compartmentalized inflammatory responses in bacterial pneumonia
Source: Research Square preprint supplement (doi:10.21203/rs.3.rs-3343362/v1), 2024-09-20
Supplement: Supplementary file 2 [file f516ac9368b518287b91a7cc.xlsx]

## Sheet: LoC_3Dconnectome
source	target	ligand	receptor	pair	mode	ligand.expression	recept.expression	ligand.scale	recept.scale	percent.source	percent.target	weight_norm	weight_sc	vector	edge	source.ligand	receptor.target	species
Endothelial	Endothelial	A2M	LRP1	A2M - LRP1	Protease inhibition	1.1217	0.0314119	0.449425	-0.211875	0.466778	0.0130217	0.0352348	0.118775	Endothelial - Endothelial	Endothelial - A2M - LRP1 - Endothelial	Endothelial - A2M	LRP1 - Endothelial	human
Endothelial	Endothelial	AANAT	MTNR1A	AANAT - MTNR1A	UNCAT	8.77234e-05	NA	-0.0127715	NA	0.000166945	NA	NA	NA	Endothelial - Endothelial	Endothelial - AANAT - MTNR1A - Endothelial	Endothelial - AANAT	MTNR1A - Endothelial	human
Endothelial	Endothelial	AANAT	MTNR1B	AANAT - MTNR1B	UNCAT	8.77234e-05	NA	-0.0127715	NA	0.000166945	NA	NA	NA	Endothelial - Endothelial	Endothelial - AANAT - MTNR1B - Endothelial	Endothelial - AANAT	MTNR1B - Endothelial	human
Endothelial	Endothelial	ACE	AGTR2	ACE - AGTR2	UNCAT	0.347923	NA	0.238802	NA	0.154758	NA	NA	NA	Endothelial - Endothelial	Endothelial - ACE - AGTR2 - Endothelial	Endothelial - ACE	AGTR2 - Endothelial	human
Endothelial	Endothelial	ACE	BDKRB2	ACE - BDKRB2	UNCAT	0.347923	0.00535563	0.238802	-0.113821	0.154758	0.00200334	0.00186335	0.06249	Endothelial - Endothelial	Endothelial - ACE - BDKRB2 - Endothelial	Endothelial - ACE	BDKRB2 - Endothelial	human
Endothelial	Endothelial	ADAM10	AXL	ADAM10 - AXL	ADAM	0.800925	0.145477	0.273445	-0.24721	0.407846	0.0779633	0.116516	0.0131175	Endothelial - Endothelial	Endothelial - ADAM10 - AXL - Endothelial	Endothelial - ADAM10	AXL - Endothelial	human
Endothelial	Endothelial	ADAM10	EPHA3	ADAM10 - EPHA3	ADAM	0.800925	0	0.273445	-0.0156317	0.407846	0	0	0.128907	Endothelial - Endothelial	Endothelial - ADAM10 - EPHA3 - Endothelial	Endothelial - ADAM10	EPHA3 - Endothelial	human
Endothelial	Endothelial	ADAM12	ITGA9	ADAM12 - ITGA9	ADAM	0.0357008	0.00274637	-0.130594	-0.0156075	0.0153589	0.00116861	9.80479e-05	-0.0731009	Endothelial - Endothelial	Endothelial - ADAM12 - ITGA9 - Endothelial	Endothelial - ADAM12	ITGA9 - Endothelial	human
Endothelial	Endothelial	ADAM12	ITGB1	ADAM12 - ITGB1	ADAM	0.0357008	2.24898	-0.130594	0.131115	0.0153589	0.894825	0.0802906	0.000260287	Endothelial - Endothelial	Endothelial - ADAM12 - ITGB1 - Endothelial	Endothelial - ADAM12	ITGB1 - Endothelial	human
Endothelial	Endothelial	ADAM12	SDC4	ADAM12 - SDC4	ADAM	0.0357008	0.143708	-0.130594	-0.386803	0.0153589	0.0676127	0.00513048	-0.258699	Endothelial - Endothelial	Endothelial - ADAM12 - SDC4 - Endothelial	Endothelial - ADAM12	SDC4 - Endothelial	human
Endothelial	Endothelial	ADAM15	ITGA5	ADAM15 - ITGA5	ADAM	0.589226	1.13311	0.170145	0.244101	0.310017	0.556928	0.667656	0.207123	Endothelial - Endothelial	Endothelial - ADAM15 - ITGA5 - Endothelial	Endothelial - ADAM15	ITGA5 - Endothelial	human
Endothelial	Endothelial	ADAM15	ITGA9	ADAM15 - ITGA9	ADAM	0.589226	0.00274637	0.170145	-0.0156075	0.310017	0.00116861	0.00161824	0.0772687	Endothelial - Endothelial	Endothelial - ADAM15 - ITGA9 - Endothelial	Endothelial - ADAM15	ITGA9 - Endothelial	human
Endothelial	Endothelial	ADAM15	ITGAV	ADAM15 - ITGAV	ADAM	0.589226	0.857661	0.170145	0.117173	0.310017	0.425543	0.505357	0.143659	Endothelial - Endothelial	Endothelial - ADAM15 - ITGAV - Endothelial	Endothelial - ADAM15	ITGAV - Endothelial	human
Endothelial	Endothelial	ADAM15	ITGB1	ADAM15 - ITGB1	ADAM	0.589226	2.24898	0.170145	0.131115	0.310017	0.894825	1.32516	0.15063	Endothelial - Endothelial	Endothelial - ADAM15 - ITGB1 - Endothelial	Endothelial - ADAM15	ITGB1 - Endothelial	human
Endothelial	Endothelial	ADAM15	ITGB3	ADAM15 - ITGB3	ADAM	0.589226	0.0218954	0.170145	-0.0518058	0.310017	0.0135225	0.0129013	0.0591696	Endothelial - Endothelial	Endothelial - ADAM15 - ITGB3 - Endothelial	Endothelial - ADAM15	ITGB3 - Endothelial	human
Endothelial	Endothelial	ADAM17	ERBB4	ADAM17 - ERBB4	ADAM	0.445831	0.000546417	0.131178	-0.0180449	0.237396	0.00033389	0.00024361	0.0565666	Endothelial - Endothelial	Endothelial - ADAM17 - ERBB4 - Endothelial	Endothelial - ADAM17	ERBB4 - Endothelial	human
Endothelial	Endothelial	ADAM17	ITGA5	ADAM17 - ITGA5	ADAM	0.445831	1.13311	0.131178	0.244101	0.237396	0.556928	0.505174	0.187639	Endothelial - Endothelial	Endothelial - ADAM17 - ITGA5 - Endothelial	Endothelial - ADAM17	ITGA5 - Endothelial	human
Endothelial	Endothelial	ADAM17	ITGB1	ADAM17 - ITGB1	ADAM	0.445831	2.24898	0.131178	0.131115	0.237396	0.894825	1.00267	0.131146	Endothelial - Endothelial	Endothelial - ADAM17 - ITGB1 - Endothelial	Endothelial - ADAM17	ITGB1 - Endothelial	human
Endothelial	Endothelial	ADAM17	NOTCH1	ADAM17 - NOTCH1	NOTCH	0.445831	0.364756	0.131178	0.227751	0.237396	0.181135	0.16262	0.179465	Endothelial - Endothelial	Endothelial - ADAM17 - NOTCH1 - Endothelial	Endothelial - ADAM17	NOTCH1 - Endothelial	human
Endothelial	Endothelial	ADAM23	ITGA5	ADAM23 - ITGA5	ADAM	0.222294	1.13311	0.174455	0.244101	0.113356	0.556928	0.251882	0.209278	Endothelial - Endothelial	Endothelial - ADAM23 - ITGA5 - Endothelial	Endothelial - ADAM23	ITGA5 - Endothelial	human
Endothelial	Endothelial	ADAM23	ITGB3	ADAM23 - ITGB3	ADAM	0.222294	0.0218954	0.174455	-0.0518058	0.113356	0.0135225	0.00486721	0.0613246	Endothelial - Endothelial	Endothelial - ADAM23 - ITGB3 - Endothelial	Endothelial - ADAM23	ITGB3 - Endothelial	human
Endothelial	Endothelial	ADAM28	ITGA4	ADAM28 - ITGA4	ADAM	0.00233993	0.0256639	-0.0524529	-0.205822	0.00116861	0.00784641	6.00519e-05	-0.129137	Endothelial - Endothelial	Endothelial - ADAM28 - ITGA4 - Endothelial	Endothelial - ADAM28	ITGA4 - Endothelial	human
Endothelial	Endothelial	ADAM2	CD9	ADAM2 - CD9	ADAM	NA	1.02592	NA	-0.107664	NA	0.43172	NA	NA	Endothelial - Endothelial	Endothelial - ADAM2 - CD9 - Endothelial	Endothelial - ADAM2	CD9 - Endothelial	human
Endothelial	Endothelial	ADAM2	ITGA6	ADAM2 - ITGA6	ADAM	NA	1.31566	NA	0.512845	NA	0.591653	NA	NA	Endothelial - Endothelial	Endothelial - ADAM2 - ITGA6 - Endothelial	Endothelial - ADAM2	ITGA6 - Endothelial	human
Endothelial	Endothelial	ADAM2	ITGA9	ADAM2 - ITGA9	ADAM	NA	0.00274637	NA	-0.0156075	NA	0.00116861	NA	NA	Endothelial - Endothelial	Endothelial - ADAM2 - ITGA9 - Endothelial	Endothelial - ADAM2	ITGA9 - Endothelial	human
Endothelial	Endothelial	ADAM2	ITGB1	ADAM2 - ITGB1	ADAM	NA	2.24898	NA	0.131115	NA	0.894825	NA	NA	Endothelial - Endothelial	Endothelial - ADAM2 - ITGB1 - Endothelial	Endothelial - ADAM2	ITGB1 - Endothelial	human
Endothelial	Endothelial	ADAM2	ITGB7	ADAM2 - ITGB7	ADAM	NA	0.000147676	NA	-0.028311	NA	0.000166945	NA	NA	Endothelial - Endothelial	Endothelial - ADAM2 - ITGB7 - Endothelial	Endothelial - ADAM2	ITGB7 - Endothelial	human
Endothelial	Endothelial	ADAM9	ITGA3	ADAM9 - ITGA3	ADAM	0.353996	0.214703	-0.126812	-0.363692	0.187813	0.101169	0.0760038	-0.245252	Endothelial - Endothelial	Endothelial - ADAM9 - ITGA3 - Endothelial	Endothelial - ADAM9	ITGA3 - Endothelial	human
Endothelial	Endothelial	ADAM9	ITGA6	ADAM9 - ITGA6	ADAM	0.353996	1.31566	-0.126812	0.512845	0.187813	0.591653	0.465739	0.193016	Endothelial - Endothelial	Endothelial - ADAM9 - ITGA6 - Endothelial	Endothelial - ADAM9	ITGA6 - Endothelial	human
Endothelial	Endothelial	ADAM9	ITGAV	ADAM9 - ITGAV	ADAM	0.353996	0.857661	-0.126812	0.117173	0.187813	0.425543	0.303608	-0.00481989	Endothelial - Endothelial	Endothelial - ADAM9 - ITGAV - Endothelial	Endothelial - ADAM9	ITGAV - Endothelial	human
Endothelial	Endothelial	ADAM9	ITGB1	ADAM9 - ITGB1	ADAM	0.353996	2.24898	-0.126812	0.131115	0.187813	0.894825	0.79613	0.00215126	Endothelial - Endothelial	Endothelial - ADAM9 - ITGB1 - Endothelial	Endothelial - ADAM9	ITGB1 - Endothelial	human
Endothelial	Endothelial	ADAM9	ITGB5	ADAM9 - ITGB5	ADAM	0.353996	0.172209	-0.126812	-0.0829851	0.187813	0.0863105	0.0609612	-0.104899	Endothelial - Endothelial	Endothelial - ADAM9 - ITGB5 - Endothelial	Endothelial - ADAM9	ITGB5 - Endothelial	human
Endothelial	Endothelial	ADCYAP1	ADCYAP1R1	ADCYAP1 - ADCYAP1R1	UNCAT	NA	NA	NA	NA	NA	NA	NA	NA	Endothelial - Endothelial	Endothelial - ADCYAP1 - ADCYAP1R1 - Endothelial	Endothelial - ADCYAP1	ADCYAP1R1 - Endothelial	human
Endothelial	Endothelial	ADCYAP1	SCTR	ADCYAP1 - SCTR	UNCAT	NA	NA	NA	NA	NA	NA	NA	NA	Endothelial - Endothelial	Endothelial - ADCYAP1 - SCTR - Endothelial	Endothelial - ADCYAP1	SCTR - Endothelial	human
Endothelial	Endothelial	ADCYAP1	VIPR1	ADCYAP1 - VIPR1	UNCAT	NA	0.0167012	NA	-0.0845654	NA	0.00734558	NA	NA	Endothelial - Endothelial	Endothelial - ADCYAP1 - VIPR1 - Endothelial	Endothelial - ADCYAP1	VIPR1 - Endothelial	human
Endothelial	Endothelial	ADCYAP1	VIPR2	ADCYAP1 - VIPR2	UNCAT	NA	0	NA	-0.0175922	NA	0	NA	NA	Endothelial - Endothelial	Endothelial - ADCYAP1 - VIPR2 - Endothelial	Endothelial - ADCYAP1	VIPR2 - Endothelial	human
Endothelial	Endothelial	ADIPOQ	ADIPOR1	ADIPOQ - ADIPOR1	Adiponectin	NA	0.309609	NA	-0.0707006	NA	0.171285	NA	NA	Endothelial - Endothelial	Endothelial - ADIPOQ - ADIPOR1 - Endothelial	Endothelial - ADIPOQ	ADIPOR1 - Endothelial	human
Endothelial	Endothelial	ADIPOQ	ADIPOR2	ADIPOQ - ADIPOR2	Adiponectin	NA	0.2484	NA	-0.017953	NA	0.126711	NA	NA	Endothelial - Endothelial	Endothelial - ADIPOQ - ADIPOR2 - Endothelial	Endothelial - ADIPOQ	ADIPOR2 - Endothelial	human
Endothelial	Endothelial	ADM2	CALCR	ADM2 - CALCR	Vasoactive	0.00377111	NA	-0.102703	NA	0.00133556	NA	NA	NA	Endothelial - Endothelial	Endothelial - ADM2 - CALCR - Endothelial	Endothelial - ADM2	CALCR - Endothelial	human
Endothelial	Endothelial	ADM2	CALCRL	ADM2 - CALCRL	Vasoactive	0.00377111	1.65593	-0.102703	0.616265	0.00133556	0.722204	0.0062447	0.256781	Endothelial - Endothelial	Endothelial - ADM2 - CALCRL - Endothelial	Endothelial - ADM2	CALCRL - Endothelial	human
Endothelial	Endothelial	ADM2	RAMP1	ADM2 - RAMP1	Vasoactive	0.00377111	0.0194183	-0.102703	-0.286244	0.00133556	0.00767947	7.32285e-05	-0.194473	Endothelial - Endothelial	Endothelial - ADM2 - RAMP1 - Endothelial	Endothelial - ADM2	RAMP1 - Endothelial	human
Endothelial	Endothelial	ADM	CALCR	ADM - CALCR	Vasoactive	0.356943	NA	0.0718765	NA	0.167112	NA	NA	NA	Endothelial - Endothelial	Endothelial - ADM - CALCR - Endothelial	Endothelial - ADM	CALCR - Endothelial	human
Endothelial	Endothelial	ADM	CALCRL	ADM - CALCRL	Vasoactive	0.356943	1.65593	0.0718765	0.616265	0.167112	0.722204	0.591073	0.344071	Endothelial - Endothelial	Endothelial - ADM - CALCRL - Endothelial	Endothelial - ADM	CALCRL - Endothelial	human
Endothelial	Endothelial	ADM	GPR182	ADM - GPR182	Vasoactive	0.356943	NA	0.0718765	NA	0.167112	NA	NA	NA	Endothelial - Endothelial	Endothelial - ADM - GPR182 - Endothelial	Endothelial - ADM	GPR182 - Endothelial	human
Endothelial	Endothelial	ADM	MRGPRX2	ADM - MRGPRX2	Vasoactive	0.356943	NA	0.0718765	NA	0.167112	NA	NA	NA	Endothelial - Endothelial	Endothelial - ADM - MRGPRX2 - Endothelial	Endothelial - ADM	MRGPRX2 - Endothelial	human
Endothelial	Endothelial	ADM	RAMP2	ADM - RAMP2	Vasoactive	0.356943	1.56596	0.0718765	0.612675	0.167112	0.701669	0.55896	0.342276	Endothelial - Endothelial	Endothelial - ADM - RAMP2 - Endothelial	Endothelial - ADM	RAMP2 - Endothelial	human
Endothelial	Endothelial	AGRN	ATP1A3	AGRN - ATP1A3	Matrix glycoproteins	0.170423	0.00155946	0.0277975	-0.0523516	0.081803	0.000834725	0.000265768	-0.0122771	Endothelial - Endothelial	Endothelial - AGRN - ATP1A3 - Endothelial	Endothelial - AGRN	ATP1A3 - Endothelial	human
Endothelial	Endothelial	AGRN	LRP4	AGRN - LRP4	Matrix glycoproteins	0.170423	0.00587502	0.0277975	-0.0276421	0.081803	0.00317195	0.00100124	7.76836e-05	Endothelial - Endothelial	Endothelial - AGRN - LRP4 - Endothelial	Endothelial - AGRN	LRP4 - Endothelial	human
Endothelial	Endothelial	AGRN	MUSK	AGRN - MUSK	Matrix glycoproteins	0.170423	0.000345367	0.0277975	-0.0129106	0.081803	0.000166945	5.88587e-05	0.00744344	Endothelial - Endothelial	Endothelial - AGRN - MUSK - Endothelial	Endothelial - AGRN	MUSK - Endothelial	human
Endothelial	Endothelial	AGRP	MC3R	AGRP - MC3R	UNCAT	NA	NA	NA	NA	NA	NA	NA	NA	Endothelial - Endothelial	Endothelial - AGRP - MC3R - Endothelial	Endothelial - AGRP	MC3R - Endothelial	human
Endothelial	Endothelial	AGRP	MC4R	AGRP - MC4R	UNCAT	NA	NA	NA	NA	NA	NA	NA	NA	Endothelial - Endothelial	Endothelial - AGRP - MC4R - Endothelial	Endothelial - AGRP	MC4R - Endothelial	human
Endothelial	Endothelial	AGRP	MC5R	AGRP - MC5R	UNCAT	NA	0	NA	-0.00907144	NA	0	NA	NA	Endothelial - Endothelial	Endothelial - AGRP - MC5R - Endothelial	Endothelial - AGRP	MC5R - Endothelial	human
Endothelial	Endothelial	AGRP	SDC3	AGRP - SDC3	UNCAT	NA	0.0938629	NA	0.0312627	NA	0.0504174	NA	NA	Endothelial - Endothelial	Endothelial - AGRP - SDC3 - Endothelial	Endothelial - AGRP	SDC3 - Endothelial	human
Endothelial	Endothelial	AGT	AGTR1	AGT - AGTR1	Vasoactive	0.00281828	0.000569991	-0.0534818	-0.0750378	0.00033389	0.00066778	1.60639e-06	-0.0642598	Endothelial - Endothelial	Endothelial - AGT - AGTR1 - Endothelial	Endothelial - AGT	AGTR1 - Endothelial	human
Endothelial	Endothelial	AGT	AGTR2	AGT - AGTR2	Vasoactive	0.00281828	NA	-0.0534818	NA	0.00033389	NA	NA	NA	Endothelial - Endothelial	Endothelial - AGT - AGTR2 - Endothelial	Endothelial - AGT	AGTR2 - Endothelial	human
Endothelial	Endothelial	AGT	LRP2	AGT - LRP2	Vasoactive	0.00281828	0	-0.0534818	-0.027502	0.00033389	0	0	-0.0404919	Endothelial - Endothelial	Endothelial - AGT - LRP2 - Endothelial	Endothelial - AGT	LRP2 - Endothelial	human
Endothelial	Endothelial	AGT	MAS1	AGT - MAS1	Vasoactive	0.00281828	0.000407896	-0.0534818	-0.019933	0.00033389	0.000166945	1.14956e-06	-0.0367074	Endothelial - Endothelial	Endothelial - AGT - MAS1 - Endothelial	Endothelial - AGT	MAS1 - Endothelial	human
Endothelial	Endothelial	AHSG	INSR	AHSG - INSR	UNCAT	0	0.753284	-0.00907144	0.254728	0	0.275626	0	0.122828	Endothelial - Endothelial	Endothelial - AHSG - INSR - Endothelial	Endothelial - AHSG	INSR - Endothelial	human
Endothelial	Endothelial	ALB	LRP2	ALB - LRP2	UNCAT	NA	0	NA	-0.027502	NA	0	NA	NA	Endothelial - Endothelial	Endothelial - ALB - LRP2 - Endothelial	Endothelial - ALB	LRP2 - Endothelial	human
Endothelial	Endothelial	AMELX	LAMP1	AMELX - LAMP1	UNCAT	NA	0.784979	NA	0.100439	NA	0.404841	NA	NA	Endothelial - Endothelial	Endothelial - AMELX - LAMP1 - Endothelial	Endothelial - AMELX	LAMP1 - Endothelial	human
Endothelial	Endothelial	AMELY	LAMP1	AMELY - LAMP1	UNCAT	NA	0.784979	NA	0.100439	NA	0.404841	NA	NA	Endothelial - Endothelial	Endothelial - AMELY - LAMP1 - Endothelial	Endothelial - AMELY	LAMP1 - Endothelial	human
Endothelial	Endothelial	AMH	ACVR1	AMH - ACVR1	UNCAT	0.00602004	0.105993	-0.0305829	-0.0187219	0.00200334	0.0580968	0.00063808	-0.0246524	Endothelial - Endothelial	Endothelial - AMH - ACVR1 - Endothelial	Endothelial - AMH	ACVR1 - Endothelial	human
Endothelial	Endothelial	AMH	AMHR2	AMH - AMHR2	UNCAT	0.00602004	0.00147891	-0.0305829	-0.0235141	0.00200334	0.000166945	8.90312e-06	-0.0270485	Endothelial - Endothelial	Endothelial - AMH - AMHR2 - Endothelial	Endothelial - AMH	AMHR2 - Endothelial	human
Endothelial	Endothelial	AMH	EGFR	AMH - EGFR	EGF	0.00602004	0.0549946	-0.0305829	-0.344129	0.00200334	0.0245409	0.00033107	-0.187356	Endothelial - Endothelial	Endothelial - AMH - EGFR - Endothelial	Endothelial - AMH	EGFR - Endothelial	human
Endothelial	Endothelial	ANGPT1	ITGA5	ANGPT1 - ITGA5	ANGPT	0.033711	1.13311	-0.18855	0.244101	0.012187	0.556928	0.0381982	0.0277751	Endothelial - Endothelial	Endothelial - ANGPT1 - ITGA5 - Endothelial	Endothelial - ANGPT1	ITGA5 - Endothelial	human
Endothelial	Endothelial	ANGPT1	ITGB1	ANGPT1 - ITGB1	ANGPT	0.033711	2.24898	-0.18855	0.131115	0.012187	0.894825	0.0758156	-0.0287178	Endothelial - Endothelial	Endothelial - ANGPT1 - ITGB1 - Endothelial	Endothelial - ANGPT1	ITGB1 - Endothelial	human
Endothelial	Endothelial	ANGPT1	TEK	ANGPT1 - TEK	ANGPT	0.033711	0.399701	-0.18855	0.276471	0.012187	0.214858	0.0134743	0.0439603	Endothelial - Endothelial	Endothelial - ANGPT1 - TEK - Endothelial	Endothelial - ANGPT1	TEK - Endothelial	human
Endothelial	Endothelial	ANGPT1	TIE1	ANGPT1 - TIE1	ANGPT	0.033711	1.37633	-0.18855	0.586197	0.012187	0.666611	0.0463976	0.198823	Endothelial - Endothelial	Endothelial - ANGPT1 - TIE1 - Endothelial	Endothelial - ANGPT1	TIE1 - Endothelial	human
Endothelial	Endothelial	ANGPT2	TEK	ANGPT2 - TEK	ANGPT	2.03464	0.399701	0.642517	0.276471	0.763105	0.214858	0.813247	0.459494	Endothelial - Endothelial	Endothelial - ANGPT2 - TEK - Endothelial	Endothelial - ANGPT2	TEK - Endothelial	human
Endothelial	Endothelial	ANGPT2	TIE1	ANGPT2 - TIE1	ANGPT	2.03464	1.37633	0.642517	0.586197	0.763105	0.666611	2.80034	0.614357	Endothelial - Endothelial	Endothelial - ANGPT2 - TIE1 - Endothelial	Endothelial - ANGPT2	TIE1 - Endothelial	human
Endothelial	Endothelial	ANGPT4	TEK	ANGPT4 - TEK	ANGPT	NA	0.399701	NA	0.276471	NA	0.214858	NA	NA	Endothelial - Endothelial	Endothelial - ANGPT4 - TEK - Endothelial	Endothelial - ANGPT4	TEK - Endothelial	human
Endothelial	Endothelial	ANGPT4	TIE1	ANGPT4 - TIE1	ANGPT	NA	1.37633	NA	0.586197	NA	0.666611	NA	NA	Endothelial - Endothelial	Endothelial - ANGPT4 - TIE1 - Endothelial	Endothelial - ANGPT4	TIE1 - Endothelial	human
Endothelial	Endothelial	ANGPTL1	TEK	ANGPTL1 - TEK	ANGPT	0.0100424	0.399701	-0.0104001	0.276471	0.00434057	0.214858	0.00401396	0.133035	Endothelial - Endothelial	Endothelial - ANGPTL1 - TEK - Endothelial	Endothelial - ANGPTL1	TEK - Endothelial	human
Endothelial	Endothelial	ANGPTL2	TIE1	ANGPTL2 - TIE1	ANGPT	0.476455	1.37633	0.279381	0.586197	0.216861	0.666611	0.655761	0.432789	Endothelial - Endothelial	Endothelial - ANGPTL2 - TIE1 - Endothelial	Endothelial - ANGPTL2	TIE1 - Endothelial	human
Endothelial	Endothelial	ANGPTL3	ITGA5	ANGPTL3 - ITGA5	ANGPT	0.000347814	1.13311	-0.0132808	0.244101	0.000166945	0.556928	0.00039411	0.11541	Endothelial - Endothelial	Endothelial - ANGPTL3 - ITGA5 - Endothelial	Endothelial - ANGPTL3	ITGA5 - Endothelial	human
Endothelial	Endothelial	ANGPTL3	ITGAV	ANGPTL3 - ITGAV	ANGPT	0.000347814	0.857661	-0.0132808	0.117173	0.000166945	0.425543	0.000298306	0.0519459	Endothelial - Endothelial	Endothelial - ANGPTL3 - ITGAV - Endothelial	Endothelial - ANGPTL3	ITGAV - Endothelial	human
Endothelial	Endothelial	ANGPTL3	ITGB3	ANGPTL3 - ITGB3	ANGPT	0.000347814	0.0218954	-0.0132808	-0.0518058	0.000166945	0.0135225	7.61551e-06	-0.0325433	Endothelial - Endothelial	Endothelial - ANGPTL3 - ITGB3 - Endothelial	Endothelial - ANGPTL3	ITGB3 - Endothelial	human
Endothelial	Endothelial	ANGPTL4	TIE1	ANGPTL4 - TIE1	ANGPT	0.192885	1.37633	-0.346375	0.586197	0.0906511	0.666611	0.265474	0.119911	Endothelial - Endothelial	Endothelial - ANGPTL4 - TIE1 - Endothelial	Endothelial - ANGPTL4	TIE1 - Endothelial	human
Endothelial	Endothelial	ANXA1	DYSF	ANXA1 - DYSF	UNCAT	1.60375	0.466125	-0.275965	0.296318	0.708013	0.246745	0.747548	0.0101769	Endothelial - Endothelial	Endothelial - ANXA1 - DYSF - Endothelial	Endothelial - ANXA1	DYSF - Endothelial	human
Endothelial	Endothelial	ANXA1	EGFR	ANXA1 - EGFR	EGF	1.60375	0.0549946	-0.275965	-0.344129	0.708013	0.0245409	0.0881977	-0.310047	Endothelial - Endothelial	Endothelial - ANXA1 - EGFR - Endothelial	Endothelial - ANXA1	EGFR - Endothelial	human
Endothelial	Endothelial	ANXA1	FPR1	ANXA1 - FPR1	Chemotaxis	1.60375	0.00125578	-0.275965	-0.0768494	0.708013	0.00066778	0.00201397	-0.176407	Endothelial - Endothelial	Endothelial - ANXA1 - FPR1 - Endothelial	Endothelial - ANXA1	FPR1 - Endothelial	human
Endothelial	Endothelial	ANXA1	FPR2	ANXA1 - FPR2	Chemotaxis	1.60375	0	-0.275965	0	0.708013	0	0	-0.137982	Endothelial - Endothelial	Endothelial - ANXA1 - FPR2 - Endothelial	Endothelial - ANXA1	FPR2 - Endothelial	human
Endothelial	Endothelial	ANXA1	FPR3	ANXA1 - FPR3	UNCAT	1.60375	NA	-0.275965	NA	0.708013	NA	NA	NA	Endothelial - Endothelial	Endothelial - ANXA1 - FPR3 - Endothelial	Endothelial - ANXA1	FPR3 - Endothelial	human
Endothelial	Endothelial	APLN	APLNR	APLN - APLNR	Vasoactive	0.621716	0.472136	0.293659	0.241556	0.244407	0.163272	0.293535	0.267608	Endothelial - Endothelial	Endothelial - APLN - APLNR - Endothelial	Endothelial - APLN	APLNR - Endothelial	human
Endothelial	Endothelial	APOB	CALCR	APOB - CALCR	UNCAT	0.0056294	NA	-0.00853924	NA	0.00367279	NA	NA	NA	Endothelial - Endothelial	Endothelial - APOB - CALCR - Endothelial	Endothelial - APOB	CALCR - Endothelial	human
Endothelial	Endothelial	APOB	ITGAM	APOB - ITGAM	UNCAT	0.0056294	0.000220423	-0.00853924	-0.0131065	0.00367279	0.000166945	1.24085e-06	-0.0108229	Endothelial - Endothelial	Endothelial - APOB - ITGAM - Endothelial	Endothelial - APOB	ITGAM - Endothelial	human
Endothelial	Endothelial	APOB	ITGB2	APOB - ITGB2	UNCAT	0.0056294	0.0111766	-0.00853924	-0.176937	0.00367279	0.00417362	6.29173e-05	-0.0927379	Endothelial - Endothelial	Endothelial - APOB - ITGB2 - Endothelial	Endothelial - APOB	ITGB2 - Endothelial	human
Endothelial	Endothelial	APOB	LDLR	APOB - LDLR	UNCAT	0.0056294	0.145198	-0.00853924	-0.187777	0.00367279	0.0732888	0.000817379	-0.0981582	Endothelial - Endothelial	Endothelial - APOB - LDLR - Endothelial	Endothelial - APOB	LDLR - Endothelial	human
Endothelial	Endothelial	APOB	LRP2	APOB - LRP2	UNCAT	0.0056294	0	-0.00853924	-0.027502	0.00367279	0	0	-0.0180206	Endothelial - Endothelial	Endothelial - APOB - LRP2 - Endothelial	Endothelial - APOB	LRP2 - Endothelial	human
Endothelial	Endothelial	APOB	LRP6	APOB - LRP6	UNCAT	0.0056294	0.318607	-0.00853924	0.0532664	0.00367279	0.162437	0.00179357	0.0223636	Endothelial - Endothelial	Endothelial - APOB - LRP6 - Endothelial	Endothelial - APOB	LRP6 - Endothelial	human
Endothelial	Endothelial	APOB	LRP8	APOB - LRP8	UNCAT	0.0056294	0.0410689	-0.00853924	-0.0807316	0.00367279	0.024207	0.000231193	-0.0446354	Endothelial - Endothelial	Endothelial - APOB - LRP8 - Endothelial	Endothelial - APOB	LRP8 - Endothelial	human
Endothelial	Endothelial	APOB	LSR	APOB - LSR	UNCAT	0.0056294	0.0399788	-0.00853924	-0.186245	0.00367279	0.0218698	0.000225057	-0.0973923	Endothelial - Endothelial	Endothelial - APOB - LSR - Endothelial	Endothelial - APOB	LSR - Endothelial	human
Endothelial	Endothelial	APOB	OLR1	APOB - OLR1	UNCAT	0.0056294	0.00140691	-0.00853924	-0.0238142	0.00367279	0.000500835	7.92004e-06	-0.0161767	Endothelial - Endothelial	Endothelial - APOB - OLR1 - Endothelial	Endothelial - APOB	OLR1 - Endothelial	human
Endothelial	Endothelial	APOC3	SDC2	APOC3 - SDC2	Complement	0.000573921	0.0328693	-0.0191173	-0.223341	0.00033389	0.0148581	1.88644e-05	-0.121229	Endothelial - Endothelial	Endothelial - APOC3 - SDC2 - Endothelial	Endothelial - APOC3	SDC2 - Endothelial	human
Endothelial	Endothelial	APOC3	TLR2	APOC3 - TLR2	TLR	0.000573921	0.00094069	-0.0191173	-0.0934479	0.00033389	0.000500835	5.39882e-07	-0.0562826	Endothelial - Endothelial	Endothelial - APOC3 - TLR2 - Endothelial	Endothelial - APOC3	TLR2 - Endothelial	human
Endothelial	Endothelial	APOD	LEPR	APOD - LEPR	UNCAT	1.35617	0.59951	0.363238	0.300645	0.36828	0.27596	0.81304	0.331942	Endothelial - Endothelial	Endothelial - APOD - LEPR - Endothelial	Endothelial - APOD	LEPR - Endothelial	human
Endothelial	Endothelial	APOE	CHRNA4	APOE - CHRNA4	APOE	0.0253532	NA	-0.110832	NA	0.0110184	NA	NA	NA	Endothelial - Endothelial	Endothelial - APOE - CHRNA4 - Endothelial	Endothelial - APOE	CHRNA4 - Endothelial	human
Endothelial	Endothelial	APOE	LDLR	APOE - LDLR	APOE	0.0253532	0.145198	-0.110832	-0.187777	0.0110184	0.0732888	0.00368124	-0.149304	Endothelial - Endothelial	Endothelial - APOE - LDLR - Endothelial	Endothelial - APOE	LDLR - Endothelial	human
Endothelial	Endothelial	APOE	LRP1	APOE - LRP1	APOE	0.0253532	0.0314119	-0.110832	-0.211875	0.0110184	0.0130217	0.000796392	-0.161354	Endothelial - Endothelial	Endothelial - APOE - LRP1 - Endothelial	Endothelial - APOE	LRP1 - Endothelial	human
Endothelial	Endothelial	APOE	LRP2	APOE - LRP2	APOE	0.0253532	0	-0.110832	-0.027502	0.0110184	0	0	-0.0691669	Endothelial - Endothelial	Endothelial - APOE - LRP2 - Endothelial	Endothelial - APOE	LRP2 - Endothelial	human
Endothelial	Endothelial	APOE	LRP5	APOE - LRP5	APOE	0.0253532	0.159593	-0.110832	0.0255498	0.0110184	0.0803005	0.00404618	-0.042641	Endothelial - Endothelial	Endothelial - APOE - LRP5 - Endothelial	Endothelial - APOE	LRP5 - Endothelial	human
Endothelial	Endothelial	APOE	LRP8	APOE - LRP8	APOE	0.0253532	0.0410689	-0.110832	-0.0807316	0.0110184	0.024207	0.00104123	-0.0957817	Endothelial - Endothelial	Endothelial - APOE - LRP8 - Endothelial	Endothelial - APOE	LRP8 - Endothelial	human
Endothelial	Endothelial	APOE	SCARB1	APOE - SCARB1	APOE	0.0253532	0.0411582	-0.110832	-0.0100714	0.0110184	0.0210351	0.00104349	-0.0604516	Endothelial - Endothelial	Endothelial - APOE - SCARB1 - Endothelial	Endothelial - APOE	SCARB1 - Endothelial	human
Endothelial	Endothelial	APOE	SORL1	APOE - SORL1	APOE	0.0253532	0.00528495	-0.110832	-0.164317	0.0110184	0.00200334	0.00013399	-0.137575	Endothelial - Endothelial	Endothelial - APOE - SORL1 - Endothelial	Endothelial - APOE	SORL1 - Endothelial	human
Endothelial	Endothelial	APOE	VLDLR	APOE - VLDLR	APOE	0.0253532	0.292445	-0.110832	0.195291	0.0110184	0.139232	0.00741442	0.0422298	Endothelial - Endothelial	Endothelial - APOE - VLDLR - Endothelial	Endothelial - APOE	VLDLR - Endothelial	human
Endothelial	Endothelial	APP	CAV1	APP - CAV1	UNCAT	2.13598	2.87609	0.452906	0.242337	0.849583	0.941402	6.14328	0.347622	Endothelial - Endothelial	Endothelial - APP - CAV1 - Endothelial	Endothelial - APP	CAV1 - Endothelial	human
Endothelial	Endothelial	APP	CD74	APP - CD74	UNCAT	2.13598	0.0135806	0.452906	-0.130041	0.849583	0.00634391	0.0290079	0.161433	Endothelial - Endothelial	Endothelial - APP - CD74 - Endothelial	Endothelial - APP	CD74 - Endothelial	human
Endothelial	Endothelial	APP	FPR2	APP - FPR2	Chemotaxis	2.13598	0	0.452906	0	0.849583	0	0	0.226453	Endothelial - Endothelial	Endothelial - APP - FPR2 - Endothelial	Endothelial - APP	FPR2 - Endothelial	human
Endothelial	Endothelial	APP	GPC1	APP - GPC1	UNCAT	2.13598	0.0567324	0.452906	-0.215047	0.849583	0.0262104	0.121179	0.11893	Endothelial - Endothelial	Endothelial - APP - GPC1 - Endothelial	Endothelial - APP	GPC1 - Endothelial	human
Endothelial	Endothelial	APP	LRP1	APP - LRP1	UNCAT	2.13598	0.0314119	0.452906	-0.211875	0.849583	0.0130217	0.0670953	0.120516	Endothelial - Endothelial	Endothelial - APP - LRP1 - Endothelial	Endothelial - APP	LRP1 - Endothelial	human
Endothelial	Endothelial	APP	NCSTN	APP - NCSTN	UNCAT	2.13598	0.309766	0.452906	0.0515207	0.849583	0.159599	0.661654	0.252214	Endothelial - Endothelial	Endothelial - APP - NCSTN - Endothelial	Endothelial - APP	NCSTN - Endothelial	human
Endothelial	Endothelial	APP	NGFR	APP - NGFR	UNCAT	2.13598	NA	0.452906	NA	0.849583	NA	NA	NA	Endothelial - Endothelial	Endothelial - APP - NGFR - Endothelial	Endothelial - APP	NGFR - Endothelial	human
Endothelial	Endothelial	APP	SLC45A3	APP - SLC45A3	UNCAT	2.13598	0.028526	0.452906	0.023363	0.849583	0.0153589	0.0609309	0.238135	Endothelial - Endothelial	Endothelial - APP - SLC45A3 - Endothelial	Endothelial - APP	SLC45A3 - Endothelial	human
Endothelial	Endothelial	APP	TNFRSF21	APP - TNFRSF21	UNCAT	2.13598	0.139434	0.452906	-0.0257467	0.849583	0.0729549	0.297829	0.21358	Endothelial - Endothelial	Endothelial - APP - TNFRSF21 - Endothelial	Endothelial - APP	TNFRSF21 - Endothelial	human
Endothelial	Endothelial	AREGB	EGFR	AREGB - EGFR	EGF	NA	0.0549946	NA	-0.344129	NA	0.0245409	NA	NA	Endothelial - Endothelial	Endothelial - AREGB - EGFR - Endothelial	Endothelial - AREGB	EGFR - Endothelial	human
Endothelial	Endothelial	AREGB	ERBB3	AREGB - ERBB3	EGF	NA	0.0206479	NA	-0.298583	NA	0.00901503	NA	NA	Endothelial - Endothelial	Endothelial - AREGB - ERBB3 - Endothelial	Endothelial - AREGB	ERBB3 - Endothelial	human
Endothelial	Endothelial	AREG	EGFR	AREG - EGFR	EGF	0.319223	0.0549946	-0.411639	-0.344129	0.100501	0.0245409	0.0175556	-0.377884	Endothelial - Endothelial	Endothelial - AREG - EGFR - Endothelial	Endothelial - AREG	EGFR - Endothelial	human
Endothelial	Endothelial	AREG	ERBB3	AREG - ERBB3	EGF	0.319223	0.0206479	-0.411639	-0.298583	0.100501	0.00901503	0.0065913	-0.355111	Endothelial - Endothelial	Endothelial - AREG - ERBB3 - Endothelial	Endothelial - AREG	ERBB3 - Endothelial	human
Endothelial	Endothelial	ARF1	CHRM3	ARF1 - CHRM3	UNCAT	1.04888	NA	-0.0941516	NA	0.546411	NA	NA	NA	Endothelial - Endothelial	Endothelial - ARF1 - CHRM3 - Endothelial	Endothelial - ARF1	CHRM3 - Endothelial	human
Endothelial	Endothelial	ARF1	INSR	ARF1 - INSR	UNCAT	1.04888	0.753284	-0.0941516	0.254728	0.546411	0.275626	0.790107	0.0802882	Endothelial - Endothelial	Endothelial - ARF1 - INSR - Endothelial	Endothelial - ARF1	INSR - Endothelial	human
Endothelial	Endothelial	ARF1	PLD2	ARF1 - PLD2	UNCAT	1.04888	0.0788422	-0.0941516	0.0304608	0.546411	0.0397329	0.0826962	-0.0318454	Endothelial - Endothelial	Endothelial - ARF1 - PLD2 - Endothelial	Endothelial - ARF1	PLD2 - Endothelial	human
Endothelial	Endothelial	ARTN	GFRA1	ARTN - GFRA1	Neurotrophins	0	0	-0.0496532	-0.0179888	0	0	0	-0.033821	Endothelial - Endothelial	Endothelial - ARTN - GFRA1 - Endothelial	Endothelial - ARTN	GFRA1 - Endothelial	human
Endothelial	Endothelial	ARTN	GFRA3	ARTN - GFRA3	Neurotrophins	0	NA	-0.0496532	NA	0	NA	NA	NA	Endothelial - Endothelial	Endothelial - ARTN - GFRA3 - Endothelial	Endothelial - ARTN	GFRA3 - Endothelial	human
Endothelial	Endothelial	ARTN	RET	ARTN - RET	Neurotrophins	0	0	-0.0496532	-0.0146775	0	0	0	-0.0321653	Endothelial - Endothelial	Endothelial - ARTN - RET - Endothelial	Endothelial - ARTN	RET - Endothelial	human
Endothelial	Endothelial	ASIP	ATRN	ASIP - ATRN	Chemotaxis	0	0.20334	-0.0117199	0.0996944	0	0.0998331	0	0.0439872	Endothelial - Endothelial	Endothelial - ASIP - ATRN - Endothelial	Endothelial - ASIP	ATRN - Endothelial	human
Endothelial	Endothelial	ASIP	F11R	ASIP - F11R	UNCAT	0	0.548178	-0.0117199	0.111019	0	0.285142	0	0.0496496	Endothelial - Endothelial	Endothelial - ASIP - F11R - Endothelial	Endothelial - ASIP	F11R - Endothelial	human
Endothelial	Endothelial	ASIP	MC1R	ASIP - MC1R	UNCAT	0	0.0103177	-0.0117199	-0.0320648	0	0.00317195	0	-0.0218924	Endothelial - Endothelial	Endothelial - ASIP - MC1R - Endothelial	Endothelial - ASIP	MC1R - Endothelial	human
Endothelial	Endothelial	ASIP	MC2R	ASIP - MC2R	UNCAT	0	NA	-0.0117199	NA	0	NA	NA	NA	Endothelial - Endothelial	Endothelial - ASIP - MC2R - Endothelial	Endothelial - ASIP	MC2R - Endothelial	human
Endothelial	Endothelial	ASIP	MC3R	ASIP - MC3R	UNCAT	0	NA	-0.0117199	NA	0	NA	NA	NA	Endothelial - Endothelial	Endothelial - ASIP - MC3R - Endothelial	Endothelial - ASIP	MC3R - Endothelial	human
Endothelial	Endothelial	ASIP	MC4R	ASIP - MC4R	UNCAT	0	NA	-0.0117199	NA	0	NA	NA	NA	Endothelial - Endothelial	Endothelial - ASIP - MC4R - Endothelial	Endothelial - ASIP	MC4R - Endothelial	human
Endothelial	Endothelial	ASIP	MC5R	ASIP - MC5R	UNCAT	0	0	-0.0117199	-0.00907144	0	0	0	-0.0103957	Endothelial - Endothelial	Endothelial - ASIP - MC5R - Endothelial	Endothelial - ASIP	MC5R - Endothelial	human
Endothelial	Endothelial	AVP	AVPR1A	AVP - AVPR1A	UNCAT	0.000276727	NA	-0.00740047	NA	0.000166945	NA	NA	NA	Endothelial - Endothelial	Endothelial - AVP - AVPR1A - Endothelial	Endothelial - AVP	AVPR1A - Endothelial	human
Endothelial	Endothelial	AVP	AVPR1B	AVP - AVPR1B	UNCAT	0.000276727	NA	-0.00740047	NA	0.000166945	NA	NA	NA	Endothelial - Endothelial	Endothelial - AVP - AVPR1B - Endothelial	Endothelial - AVP	AVPR1B - Endothelial	human
Endothelial	Endothelial	AVP	AVPR2	AVP - AVPR2	UNCAT	0.000276727	0.000742289	-0.00740047	-0.0110401	0.000166945	0.00033389	2.05411e-07	-0.0092203	Endothelial - Endothelial	Endothelial - AVP - AVPR2 - Endothelial	Endothelial - AVP	AVPR2 - Endothelial	human
Endothelial	Endothelial	AVP	OXTR	AVP - OXTR	UNCAT	0.000276727	0.00973045	-0.00740047	-0.0788376	0.000166945	0.00183639	2.69268e-06	-0.043119	Endothelial - Endothelial	Endothelial - AVP - OXTR - Endothelial	Endothelial - AVP	OXTR - Endothelial	human
Endothelial	Endothelial	AZGP1	ITGAV	AZGP1 - ITGAV	UNCAT	0.185873	0.857661	-0.399175	0.117173	0.066611	0.425543	0.159416	-0.141001	Endothelial - Endothelial	Endothelial - AZGP1 - ITGAV - Endothelial	Endothelial - AZGP1	ITGAV - Endothelial	human
Endothelial	Endothelial	B2M	CD1A	B2M - CD1A	UNCAT	3.36763	NA	0.338734	NA	0.975459	NA	NA	NA	Endothelial - Endothelial	Endothelial - B2M - CD1A - Endothelial	Endothelial - B2M	CD1A - Endothelial	human
Endothelial	Endothelial	B2M	CD1B	B2M - CD1B	UNCAT	3.36763	NA	0.338734	NA	0.975459	NA	NA	NA	Endothelial - Endothelial	Endothelial - B2M - CD1B - Endothelial	Endothelial - B2M	CD1B - Endothelial	human
Endothelial	Endothelial	B2M	CD247	B2M - CD247	UNCAT	3.36763	0	0.338734	-0.00907144	0.975459	0	0	0.164831	Endothelial - Endothelial	Endothelial - B2M - CD247 - Endothelial	Endothelial - B2M	CD247 - Endothelial	human
Endothelial	Endothelial	B2M	CD3D	B2M - CD3D	UNCAT	3.36763	0	0.338734	-0.00907144	0.975459	0	0	0.164831	Endothelial - Endothelial	Endothelial - B2M - CD3D - Endothelial	Endothelial - B2M	CD3D - Endothelial	human
Endothelial	Endothelial	B2M	CD3G	B2M - CD3G	UNCAT	3.36763	NA	0.338734	NA	0.975459	NA	NA	NA	Endothelial - Endothelial	Endothelial - B2M - CD3G - Endothelial	Endothelial - B2M	CD3G - Endothelial	human
Endothelial	Endothelial	B2M	HFE	B2M - HFE	UNCAT	3.36763	0.017456	0.338734	-0.0834643	0.975459	0.00868114	0.0587852	0.127635	Endothelial - Endothelial	Endothelial - B2M - HFE - Endothelial	Endothelial - B2M	HFE - Endothelial	human
Endothelial	Endothelial	B2M	HLA-F	B2M - HLA-F	UNCAT	3.36763	0.043162	0.338734	0.00138842	0.975459	0.0200334	0.145354	0.170061	Endothelial - Endothelial	Endothelial - B2M - HLA-F - Endothelial	Endothelial - B2M	HLA-F - Endothelial	human
Endothelial	Endothelial	B2M	KIR2DL1	B2M - KIR2DL1	UNCAT	3.36763	NA	0.338734	NA	0.975459	NA	NA	NA	Endothelial - Endothelial	Endothelial - B2M - KIR2DL1 - Endothelial	Endothelial - B2M	KIR2DL1 - Endothelial	human
Endothelial	Endothelial	B2M	KIR2DL3	B2M - KIR2DL3	UNCAT	3.36763	NA	0.338734	NA	0.975459	NA	NA	NA	Endothelial - Endothelial	Endothelial - B2M - KIR2DL3 - Endothelial	Endothelial - B2M	KIR2DL3 - Endothelial	human
Endothelial	Endothelial	B2M	KIR3DL1	B2M - KIR3DL1	UNCAT	3.36763	NA	0.338734	NA	0.975459	NA	NA	NA	Endothelial - Endothelial	Endothelial - B2M - KIR3DL1 - Endothelial	Endothelial - B2M	KIR3DL1 - Endothelial	human
Endothelial	Endothelial	B2M	KLRC1	B2M - KLRC1	UNCAT	3.36763	0.00125538	0.338734	-0.0441439	0.975459	0.000166945	0.00422766	0.147295	Endothelial - Endothelial	Endothelial - B2M - KLRC1 - Endothelial	Endothelial - B2M	KLRC1 - Endothelial	human
Endothelial	Endothelial	B2M	KLRD1	B2M - KLRD1	UNCAT	3.36763	0.00654194	0.338734	-0.0149444	0.975459	0.00283806	0.0220308	0.161895	Endothelial - Endothelial	Endothelial - B2M - KLRD1 - Endothelial	Endothelial - B2M	KLRD1 - Endothelial	human
Endothelial	Endothelial	B2M	LILRB1	B2M - LILRB1	UNCAT	3.36763	0.00149347	0.338734	-0.0122998	0.975459	0.00116861	0.00502946	0.163217	Endothelial - Endothelial	Endothelial - B2M - LILRB1 - Endothelial	Endothelial - B2M	LILRB1 - Endothelial	human
Endothelial	Endothelial	B2M	LILRB2	B2M - LILRB2	UNCAT	3.36763	NA	0.338734	NA	0.975459	NA	NA	NA	Endothelial - Endothelial	Endothelial - B2M - LILRB2 - Endothelial	Endothelial - B2M	LILRB2 - Endothelial	human
Endothelial	Endothelial	B2M	TFRC	B2M - TFRC	Transferrin	3.36763	0.179359	0.338734	-0.117193	0.975459	0.0923205	0.604013	0.11077	Endothelial - Endothelial	Endothelial - B2M - TFRC - Endothelial	Endothelial - B2M	TFRC - Endothelial	human
Endothelial	Endothelial	BCAN	EGFR	BCAN - EGFR	EGF	0.00136584	0.0549946	-0.0172716	-0.344129	0.00100167	0.0245409	7.5114e-05	-0.1807	Endothelial - Endothelial	Endothelial - BCAN - EGFR - Endothelial	Endothelial - BCAN	EGFR - Endothelial	human
Endothelial	Endothelial	BCAN	NRCAM	BCAN - NRCAM	UNCAT	0.00136584	0.169478	-0.0172716	0.100995	0.00100167	0.0944908	0.00023148	0.0418616	Endothelial - Endothelial	Endothelial - BCAN - NRCAM - Endothelial	Endothelial - BCAN	NRCAM - Endothelial	human
Endothelial	Endothelial	BDNF	DDR1	BDNF - DDR1	Neurotrophins	0.0233322	0.04846	-0.148202	-0.170533	0.0105175	0.0228715	0.00113068	-0.159368	Endothelial - Endothelial	Endothelial - BDNF - DDR1 - Endothelial	Endothelial - BDNF	DDR1 - Endothelial	human
Endothelial	Endothelial	BDNF	DRD4	BDNF - DRD4	Neurotrophins	0.0233322	0.000345868	-0.148202	-0.0184623	0.0105175	0.000166945	8.06986e-06	-0.0833322	Endothelial - Endothelial	Endothelial - BDNF - DRD4 - Endothelial	Endothelial - BDNF	DRD4 - Endothelial	human
Endothelial	Endothelial	BDNF	NGFR	BDNF - NGFR	Neurotrophins	0.0233322	NA	-0.148202	NA	0.0105175	NA	NA	NA	Endothelial - Endothelial	Endothelial - BDNF - NGFR - Endothelial	Endothelial - BDNF	NGFR - Endothelial	human
Endothelial	Endothelial	BDNF	NGFRAP1	BDNF - NGFRAP1	Neurotrophins	0.0233322	NA	-0.148202	NA	0.0105175	NA	NA	NA	Endothelial - Endothelial	Endothelial - BDNF - NGFRAP1 - Endothelial	Endothelial - BDNF	NGFRAP1 - Endothelial	human
Endothelial	Endothelial	BDNF	NTRK2	BDNF - NTRK2	Neurotrophins	0.0233322	0	-0.148202	-0.0231531	0.0105175	0	0	-0.0856776	Endothelial - Endothelial	Endothelial - BDNF - NTRK2 - Endothelial	Endothelial - BDNF	NTRK2 - Endothelial	human
Endothelial	Endothelial	BDNF	SORT1	BDNF - SORT1	Neurotrophins	0.0233322	0.0546484	-0.148202	-0.131244	0.0105175	0.0247078	0.00127507	-0.139723	Endothelial - Endothelial	Endothelial - BDNF - SORT1 - Endothelial	Endothelial - BDNF	SORT1 - Endothelial	human
Endothelial	Endothelial	BGN	LY96	BGN - LY96	UNCAT	1.50956	0.582093	0.317653	0.0378792	0.641569	0.306344	0.878704	0.177766	Endothelial - Endothelial	Endothelial - BGN - LY96 - Endothelial	Endothelial - BGN	LY96 - Endothelial	human
Endothelial	Endothelial	BGN	TLR1	BGN - TLR1	TLR	1.50956	0.0149342	0.317653	0.0160981	0.641569	0.00884808	0.0225441	0.166875	Endothelial - Endothelial	Endothelial - BGN - TLR1 - Endothelial	Endothelial - BGN	TLR1 - Endothelial	human
Endothelial	Endothelial	BGN	TLR2	BGN - TLR2	TLR	1.50956	0.00094069	0.317653	-0.0934479	0.641569	0.000500835	0.00142003	0.112102	Endothelial - Endothelial	Endothelial - BGN - TLR2 - Endothelial	Endothelial - BGN	TLR2 - Endothelial	human
Endothelial	Endothelial	BGN	TLR4	BGN - TLR4	TLR	1.50956	0.0960364	0.317653	0.119213	0.641569	0.0560935	0.144973	0.218433	Endothelial - Endothelial	Endothelial - BGN - TLR4 - Endothelial	Endothelial - BGN	TLR4 - Endothelial	human
Endothelial	Endothelial	BMP10	ACVR1	BMP10 - ACVR1	BMP	NA	0.105993	NA	-0.0187219	NA	0.0580968	NA	NA	Endothelial - Endothelial	Endothelial - BMP10 - ACVR1 - Endothelial	Endothelial - BMP10	ACVR1 - Endothelial	human
Endothelial	Endothelial	BMP10	ACVR2A	BMP10 - ACVR2A	BMP	NA	0.0908898	NA	0.0372982	NA	0.0474124	NA	NA	Endothelial - Endothelial	Endothelial - BMP10 - ACVR2A - Endothelial	Endothelial - BMP10	ACVR2A - Endothelial	human
Endothelial	Endothelial	BMP10	ACVR2B	BMP10 - ACVR2B	BMP	NA	0.0650963	NA	0.0257092	NA	0.0322204	NA	NA	Endothelial - Endothelial	Endothelial - BMP10 - ACVR2B - Endothelial	Endothelial - BMP10	ACVR2B - Endothelial	human
Endothelial	Endothelial	BMP10	ACVRL1	BMP10 - ACVRL1	BMP	NA	0.680497	NA	0.378819	NA	0.360935	NA	NA	Endothelial - Endothelial	Endothelial - BMP10 - ACVRL1 - Endothelial	Endothelial - BMP10	ACVRL1 - Endothelial	human
Endothelial	Endothelial	BMP10	BMPR1A	BMP10 - BMPR1A	BMP	NA	0.0085866	NA	-0.144691	NA	0.00450751	NA	NA	Endothelial - Endothelial	Endothelial - BMP10 - BMPR1A - Endothelial	Endothelial - BMP10	BMPR1A - Endothelial	human
Endothelial	Endothelial	BMP10	BMPR1B	BMP10 - BMPR1B	BMP	NA	0.0106833	NA	-0.0143942	NA	0.00500835	NA	NA	Endothelial - Endothelial	Endothelial - BMP10 - BMPR1B - Endothelial	Endothelial - BMP10	BMPR1B - Endothelial	human
Endothelial	Endothelial	BMP10	BMPR2	BMP10 - BMPR2	BMP	NA	1.13223	NA	0.39767	NA	0.550584	NA	NA	Endothelial - Endothelial	Endothelial - BMP10 - BMPR2 - Endothelial	Endothelial - BMP10	BMPR2 - Endothelial	human
Endothelial	Endothelial	BMP10	ENG	BMP10 - ENG	BMP	NA	1.26612	NA	0.46191	NA	0.610017	NA	NA	Endothelial - Endothelial	Endothelial - BMP10 - ENG - Endothelial	Endothelial - BMP10	ENG - Endothelial	human
Endothelial	Endothelial	BMP15	ACVR1	BMP15 - ACVR1	BMP	NA	0.105993	NA	-0.0187219	NA	0.0580968	NA	NA	Endothelial - Endothelial	Endothelial - BMP15 - ACVR1 - Endothelial	Endothelial - BMP15	ACVR1 - Endothelial	human
Endothelial	Endothelial	BMP15	ACVR2A	BMP15 - ACVR2A	BMP	NA	0.0908898	NA	0.0372982	NA	0.0474124	NA	NA	Endothelial - Endothelial	Endothelial - BMP15 - ACVR2A - Endothelial	Endothelial - BMP15	ACVR2A - Endothelial	human
Endothelial	Endothelial	BMP15	ACVR2B	BMP15 - ACVR2B	BMP	NA	0.0650963	NA	0.0257092	NA	0.0322204	NA	NA	Endothelial - Endothelial	Endothelial - BMP15 - ACVR2B - Endothelial	Endothelial - BMP15	ACVR2B - Endothelial	human
Endothelial	Endothelial	BMP15	BMPR1A	BMP15 - BMPR1A	BMP	NA	0.0085866	NA	-0.144691	NA	0.00450751	NA	NA	Endothelial - Endothelial	Endothelial - BMP15 - BMPR1A - Endothelial	Endothelial - BMP15	BMPR1A - Endothelial	human
Endothelial	Endothelial	BMP15	BMPR1B	BMP15 - BMPR1B	BMP	NA	0.0106833	NA	-0.0143942	NA	0.00500835	NA	NA	Endothelial - Endothelial	Endothelial - BMP15 - BMPR1B - Endothelial	Endothelial - BMP15	BMPR1B - Endothelial	human
Endothelial	Endothelial	BMP15	BMPR2	BMP15 - BMPR2	BMP	NA	1.13223	NA	0.39767	NA	0.550584	NA	NA	Endothelial - Endothelial	Endothelial - BMP15 - BMPR2 - Endothelial	Endothelial - BMP15	BMPR2 - Endothelial	human
Endothelial	Endothelial	BMP2	ACVR1	BMP2 - ACVR1	BMP	0.470193	0.105993	0.240979	-0.0187219	0.200167	0.0580968	0.049837	0.111128	Endothelial - Endothelial	Endothelial - BMP2 - ACVR1 - Endothelial	Endothelial - BMP2	ACVR1 - Endothelial	human
Endothelial	Endothelial	BMP2	ACVR2A	BMP2 - ACVR2A	BMP	0.470193	0.0908898	0.240979	0.0372982	0.200167	0.0474124	0.0427358	0.139138	Endothelial - Endothelial	Endothelial - BMP2 - ACVR2A - Endothelial	Endothelial - BMP2	ACVR2A - Endothelial	human
Endothelial	Endothelial	BMP2	ACVR2B	BMP2 - ACVR2B	BMP	0.470193	0.0650963	0.240979	0.0257092	0.200167	0.0322204	0.0306079	0.133344	Endothelial - Endothelial	Endothelial - BMP2 - ACVR2B - Endothelial	Endothelial - BMP2	ACVR2B - Endothelial	human
Endothelial	Endothelial	BMP2	BMPR1A	BMP2 - BMPR1A	BMP	0.470193	0.0085866	0.240979	-0.144691	0.200167	0.00450751	0.00403736	0.0481437	Endothelial - Endothelial	Endothelial - BMP2 - BMPR1A - Endothelial	Endothelial - BMP2	BMPR1A - Endothelial	human
Endothelial	Endothelial	BMP2	BMPR1B	BMP2 - BMPR1B	BMP	0.470193	0.0106833	0.240979	-0.0143942	0.200167	0.00500835	0.00502319	0.113292	Endothelial - Endothelial	Endothelial - BMP2 - BMPR1B - Endothelial	Endothelial - BMP2	BMPR1B - Endothelial	human
Endothelial	Endothelial	BMP2	BMPR2	BMP2 - BMPR2	BMP	0.470193	1.13223	0.240979	0.39767	0.200167	0.550584	0.532367	0.319324	Endothelial - Endothelial	Endothelial - BMP2 - BMPR2 - Endothelial	Endothelial - BMP2	BMPR2 - Endothelial	human
Endothelial	Endothelial	BMP2	ENG	BMP2 - ENG	BMP	0.470193	1.26612	0.240979	0.46191	0.200167	0.610017	0.595321	0.351445	Endothelial - Endothelial	Endothelial - BMP2 - ENG - Endothelial	Endothelial - BMP2	ENG - Endothelial	human
Endothelial	Endothelial	BMP2	HFE2	BMP2 - HFE2	BMP	0.470193	NA	0.240979	NA	0.200167	NA	NA	NA	Endothelial - Endothelial	Endothelial - BMP2 - HFE2 - Endothelial	Endothelial - BMP2	HFE2 - Endothelial	human
Endothelial	Endothelial	BMP3	ACVR1	BMP3 - ACVR1	BMP	0	0.105993	-0.0443246	-0.0187219	0	0.0580968	0	-0.0315232	Endothelial - Endothelial	Endothelial - BMP3 - ACVR1 - Endothelial	Endothelial - BMP3	ACVR1 - Endothelial	human
Endothelial	Endothelial	BMP3	ACVR2A	BMP3 - ACVR2A	BMP	0	0.0908898	-0.0443246	0.0372982	0	0.0474124	0	-0.0035132	Endothelial - Endothelial	Endothelial - BMP3 - ACVR2A - Endothelial	Endothelial - BMP3	ACVR2A - Endothelial	human
Endothelial	Endothelial	BMP3	ACVR2B	BMP3 - ACVR2B	BMP	0	0.0650963	-0.0443246	0.0257092	0	0.0322204	0	-0.00930769	Endothelial - Endothelial	Endothelial - BMP3 - ACVR2B - Endothelial	Endothelial - BMP3	ACVR2B - Endothelial	human
Endothelial	Endothelial	BMP3	BMPR1A	BMP3 - BMPR1A	BMP	0	0.0085866	-0.0443246	-0.144691	0	0.00450751	0	-0.094508	Endothelial - Endothelial	Endothelial - BMP3 - BMPR1A - Endothelial	Endothelial - BMP3	BMPR1A - Endothelial	human
Endothelial	Endothelial	BMP3	BMPR1B	BMP3 - BMPR1B	BMP	0	0.0106833	-0.0443246	-0.0143942	0	0.00500835	0	-0.0293594	Endothelial - Endothelial	Endothelial - BMP3 - BMPR1B - Endothelial	Endothelial - BMP3	BMPR1B - Endothelial	human
Endothelial	Endothelial	BMP3	BMPR2	BMP3 - BMPR2	BMP	0	1.13223	-0.0443246	0.39767	0	0.550584	0	0.176673	Endothelial - Endothelial	Endothelial - BMP3 - BMPR2 - Endothelial	Endothelial - BMP3	BMPR2 - Endothelial	human
Endothelial	Endothelial	BMP4	ACVR1	BMP4 - ACVR1	BMP	0.489179	0.105993	0.261251	-0.0187219	0.213022	0.0580968	0.0518493	0.121265	Endothelial - Endothelial	Endothelial - BMP4 - ACVR1 - Endothelial	Endothelial - BMP4	ACVR1 - Endothelial	human
Endothelial	Endothelial	BMP4	ACVR2A	BMP4 - ACVR2A	BMP	0.489179	0.0908898	0.261251	0.0372982	0.213022	0.0474124	0.0444614	0.149275	Endothelial - Endothelial	Endothelial - BMP4 - ACVR2A - Endothelial	Endothelial - BMP4	ACVR2A - Endothelial	human
Endothelial	Endothelial	BMP4	ACVR2B	BMP4 - ACVR2B	BMP	0.489179	0.0650963	0.261251	0.0257092	0.213022	0.0322204	0.0318437	0.14348	Endothelial - Endothelial	Endothelial - BMP4 - ACVR2B - Endothelial	Endothelial - BMP4	ACVR2B - Endothelial	human
Endothelial	Endothelial	BMP4	BMPR1A	BMP4 - BMPR1A	BMP	0.489179	0.0085866	0.261251	-0.144691	0.213022	0.00450751	0.00420038	0.05828	Endothelial - Endothelial	Endothelial - BMP4 - BMPR1A - Endothelial	Endothelial - BMP4	BMPR1A - Endothelial	human
Endothelial	Endothelial	BMP4	BMPR1B	BMP4 - BMPR1B	BMP	0.489179	0.0106833	0.261251	-0.0143942	0.213022	0.00500835	0.00522602	0.123429	Endothelial - Endothelial	Endothelial - BMP4 - BMPR1B - Endothelial	Endothelial - BMP4	BMPR1B - Endothelial	human
Endothelial	Endothelial	BMP4	BMPR2	BMP4 - BMPR2	BMP	0.489179	1.13223	0.261251	0.39767	0.213022	0.550584	0.553862	0.329461	Endothelial - Endothelial	Endothelial - BMP4 - BMPR2 - Endothelial	Endothelial - BMP4	BMPR2 - Endothelial	human
Endothelial	Endothelial	BMP4	HFE2	BMP4 - HFE2	BMP	0.489179	NA	0.261251	NA	0.213022	NA	NA	NA	Endothelial - Endothelial	Endothelial - BMP4 - HFE2 - Endothelial	Endothelial - BMP4	HFE2 - Endothelial	human
Endothelial	Endothelial	BMP5	ACVR1	BMP5 - ACVR1	BMP	0.000569227	0.105993	-0.0752168	-0.0187219	0.000166945	0.0580968	6.03339e-05	-0.0469693	Endothelial - Endothelial	Endothelial - BMP5 - ACVR1 - Endothelial	Endothelial - BMP5	ACVR1 - Endothelial	human
Endothelial	Endothelial	BMP5	ACVR2A	BMP5 - ACVR2A	BMP	0.000569227	0.0908898	-0.0752168	0.0372982	0.000166945	0.0474124	5.1737e-05	-0.0189593	Endothelial - Endothelial	Endothelial - BMP5 - ACVR2A - Endothelial	Endothelial - BMP5	ACVR2A - Endothelial	human
Endothelial	Endothelial	BMP5	ACVR2B	BMP5 - ACVR2B	BMP	0.000569227	0.0650963	-0.0752168	0.0257092	0.000166945	0.0322204	3.70546e-05	-0.0247538	Endothelial - Endothelial	Endothelial - BMP5 - ACVR2B - Endothelial	Endothelial - BMP5	ACVR2B - Endothelial	human
Endothelial	Endothelial	BMP5	BMPR1A	BMP5 - BMPR1A	BMP	0.000569227	0.0085866	-0.0752168	-0.144691	0.000166945	0.00450751	4.88773e-06	-0.109954	Endothelial - Endothelial	Endothelial - BMP5 - BMPR1A - Endothelial	Endothelial - BMP5	BMPR1A - Endothelial	human
Endothelial	Endothelial	BMP5	BMPR1B	BMP5 - BMPR1B	BMP	0.000569227	0.0106833	-0.0752168	-0.0143942	0.000166945	0.00500835	6.0812e-06	-0.0448055	Endothelial - Endothelial	Endothelial - BMP5 - BMPR1B - Endothelial	Endothelial - BMP5	BMPR1B - Endothelial	human
Endothelial	Endothelial	BMP5	BMPR2	BMP5 - BMPR2	BMP	0.000569227	1.13223	-0.0752168	0.39767	0.000166945	0.550584	0.000644496	0.161226	Endothelial - Endothelial	Endothelial - BMP5 - BMPR2 - Endothelial	Endothelial - BMP5	BMPR2 - Endothelial	human
Endothelial	Endothelial	BMP5	HFE2	BMP5 - HFE2	BMP	0.000569227	NA	-0.0752168	NA	0.000166945	NA	NA	NA	Endothelial - Endothelial	Endothelial - BMP5 - HFE2 - Endothelial	Endothelial - BMP5	HFE2 - Endothelial	human
Endothelial	Endothelial	BMP6	ACVR1	BMP6 - ACVR1	BMP	0.471723	0.105993	0.304616	-0.0187219	0.24591	0.0580968	0.0499991	0.142947	Endothelial - Endothelial	Endothelial - BMP6 - ACVR1 - Endothelial	Endothelial - BMP6	ACVR1 - Endothelial	human
Endothelial	Endothelial	BMP6	ACVR2A	BMP6 - ACVR2A	BMP	0.471723	0.0908898	0.304616	0.0372982	0.24591	0.0474124	0.0428748	0.170957	Endothelial - Endothelial	Endothelial - BMP6 - ACVR2A - Endothelial	Endothelial - BMP6	ACVR2A - Endothelial	human
Endothelial	Endothelial	BMP6	ACVR2B	BMP6 - ACVR2B	BMP	0.471723	0.0650963	0.304616	0.0257092	0.24591	0.0322204	0.0307074	0.165162	Endothelial - Endothelial	Endothelial - BMP6 - ACVR2B - Endothelial	Endothelial - BMP6	ACVR2B - Endothelial	human
Endothelial	Endothelial	BMP6	BMPR1A	BMP6 - BMPR1A	BMP	0.471723	0.0085866	0.304616	-0.144691	0.24591	0.00450751	0.0040505	0.0799621	Endothelial - Endothelial	Endothelial - BMP6 - BMPR1A - Endothelial	Endothelial - BMP6	BMPR1A - Endothelial	human
Endothelial	Endothelial	BMP6	BMPR1B	BMP6 - BMPR1B	BMP	0.471723	0.0106833	0.304616	-0.0143942	0.24591	0.00500835	0.00503954	0.145111	Endothelial - Endothelial	Endothelial - BMP6 - BMPR1B - Endothelial	Endothelial - BMP6	BMPR1B - Endothelial	human
Endothelial	Endothelial	BMP6	BMPR2	BMP6 - BMPR2	BMP	0.471723	1.13223	0.304616	0.39767	0.24591	0.550584	0.534098	0.351143	Endothelial - Endothelial	Endothelial - BMP6 - BMPR2 - Endothelial	Endothelial - BMP6	BMPR2 - Endothelial	human
Endothelial	Endothelial	BMP7	ACVR1	BMP7 - ACVR1	BMP	0	0.105993	0	-0.0187219	0	0.0580968	0	-0.00936093	Endothelial - Endothelial	Endothelial - BMP7 - ACVR1 - Endothelial	Endothelial - BMP7	ACVR1 - Endothelial	human
Endothelial	Endothelial	BMP7	ACVR2A	BMP7 - ACVR2A	BMP	0	0.0908898	0	0.0372982	0	0.0474124	0	0.0186491	Endothelial - Endothelial	Endothelial - BMP7 - ACVR2A - Endothelial	Endothelial - BMP7	ACVR2A - Endothelial	human
Endothelial	Endothelial	BMP7	ACVR2B	BMP7 - ACVR2B	BMP	0	0.0650963	0	0.0257092	0	0.0322204	0	0.0128546	Endothelial - Endothelial	Endothelial - BMP7 - ACVR2B - Endothelial	Endothelial - BMP7	ACVR2B - Endothelial	human
Endothelial	Endothelial	BMP7	BMPR1A	BMP7 - BMPR1A	BMP	0	0.0085866	0	-0.144691	0	0.00450751	0	-0.0723457	Endothelial - Endothelial	Endothelial - BMP7 - BMPR1A - Endothelial	Endothelial - BMP7	BMPR1A - Endothelial	human
Endothelial	Endothelial	BMP7	BMPR1B	BMP7 - BMPR1B	BMP	0	0.0106833	0	-0.0143942	0	0.00500835	0	-0.00719709	Endothelial - Endothelial	Endothelial - BMP7 - BMPR1B - Endothelial	Endothelial - BMP7	BMPR1B - Endothelial	human
Endothelial	Endothelial	BMP7	BMPR2	BMP7 - BMPR2	BMP	0	1.13223	0	0.39767	0	0.550584	0	0.198835	Endothelial - Endothelial	Endothelial - BMP7 - BMPR2 - Endothelial	Endothelial - BMP7	BMPR2 - Endothelial	human
Endothelial	Endothelial	BMP7	ENG	BMP7 - ENG	BMP	0	1.26612	0	0.46191	0	0.610017	0	0.230955	Endothelial - Endothelial	Endothelial - BMP7 - ENG - Endothelial	Endothelial - BMP7	ENG - Endothelial	human
Endothelial	Endothelial	BMP8B	ACVR1	BMP8B - ACVR1	BMP	0.000747673	0.105993	-0.0310793	-0.0187219	0.00033389	0.0580968	7.92478e-05	-0.0249006	Endothelial - Endothelial	Endothelial - BMP8B - ACVR1 - Endothelial	Endothelial - BMP8B	ACVR1 - Endothelial	human
Endothelial	Endothelial	BMP8B	ACVR2A	BMP8B - ACVR2A	BMP	0.000747673	0.0908898	-0.0310793	0.0372982	0.00033389	0.0474124	6.79559e-05	0.00310945	Endothelial - Endothelial	Endothelial - BMP8B - ACVR2A - Endothelial	Endothelial - BMP8B	ACVR2A - Endothelial	human
Endothelial	Endothelial	BMP8B	ACVR2B	BMP8B - ACVR2B	BMP	0.000747673	0.0650963	-0.0310793	0.0257092	0.00033389	0.0322204	4.86708e-05	-0.00268504	Endothelial - Endothelial	Endothelial - BMP8B - ACVR2B - Endothelial	Endothelial - BMP8B	ACVR2B - Endothelial	human
Endothelial	Endothelial	BMP8B	BMPR1A	BMP8B - BMPR1A	BMP	0.000747673	0.0085866	-0.0310793	-0.144691	0.00033389	0.00450751	6.41997e-06	-0.0878853	Endothelial - Endothelial	Endothelial - BMP8B - BMPR1A - Endothelial	Endothelial - BMP8B	BMPR1A - Endothelial	human
Endothelial	Endothelial	BMP8B	BMPR1B	BMP8B - BMPR1B	BMP	0.000747673	0.0106833	-0.0310793	-0.0143942	0.00033389	0.00500835	7.98758e-06	-0.0227367	Endothelial - Endothelial	Endothelial - BMP8B - BMPR1B - Endothelial	Endothelial - BMP8B	BMPR1B - Endothelial	human
Endothelial	Endothelial	BMP8B	BMPR2	BMP8B - BMPR2	BMP	0.000747673	1.13223	-0.0310793	0.39767	0.00033389	0.550584	0.000846538	0.183295	Endothelial - Endothelial	Endothelial - BMP8B - BMPR2 - Endothelial	Endothelial - BMP8B	BMPR2 - Endothelial	human
Endothelial	Endothelial	BST1	CAV1	BST1 - CAV1	UNCAT	0.0462733	2.87609	0.00438923	0.242337	0.0227045	0.941402	0.133086	0.123363	Endothelial - Endothelial	Endothelial - BST1 - CAV1 - Endothelial	Endothelial - BST1	CAV1 - Endothelial	human
Endothelial	Endothelial	BTC	EGFR	BTC - EGFR	EGF	0.00152952	0.0549946	-0.115354	-0.344129	0.000834725	0.0245409	8.41153e-05	-0.229741	Endothelial - Endothelial	Endothelial - BTC - EGFR - Endothelial	Endothelial - BTC	EGFR - Endothelial	human
Endothelial	Endothelial	BTC	ERBB2	BTC - ERBB2	UNCAT	0.00152952	0.0217755	-0.115354	-0.180314	0.000834725	0.00984975	3.3306e-05	-0.147834	Endothelial - Endothelial	Endothelial - BTC - ERBB2 - Endothelial	Endothelial - BTC	ERBB2 - Endothelial	human
Endothelial	Endothelial	BTC	ERBB3	BTC - ERBB3	UNCAT	0.00152952	0.0206479	-0.115354	-0.298583	0.000834725	0.00901503	3.15814e-05	-0.206968	Endothelial - Endothelial	Endothelial - BTC - ERBB3 - Endothelial	Endothelial - BTC	ERBB3 - Endothelial	human
Endothelial	Endothelial	BTC	ERBB4	BTC - ERBB4	UNCAT	0.00152952	0.000546417	-0.115354	-0.0180449	0.000834725	0.00033389	8.35754e-07	-0.0666993	Endothelial - Endothelial	Endothelial - BTC - ERBB4 - Endothelial	Endothelial - BTC	ERBB4 - Endothelial	human
Endothelial	Endothelial	BTLA	CD247	BTLA - CD247	TNF	0.000261733	0	-0.0198886	-0.00907144	0.00033389	0	0	-0.01448	Endothelial - Endothelial	Endothelial - BTLA - CD247 - Endothelial	Endothelial - BTLA	CD247 - Endothelial	human
Endothelial	Endothelial	BTLA	CD79A	BTLA - CD79A	TNF	0.000261733	0.000877039	-0.0198886	-0.015956	0.00033389	0.000500835	2.29551e-07	-0.0179223	Endothelial - Endothelial	Endothelial - BTLA - CD79A - Endothelial	Endothelial - BTLA	CD79A - Endothelial	human
Endothelial	Endothelial	BTLA	TNFRSF14	BTLA - TNFRSF14	TNF	0.000261733	0.127787	-0.0198886	0.0638277	0.00033389	0.0657763	3.3446e-05	0.0219695	Endothelial - Endothelial	Endothelial - BTLA - TNFRSF14 - Endothelial	Endothelial - BTLA	TNFRSF14 - Endothelial	human
Endothelial	Endothelial	BTLA	VTCN1	BTLA - VTCN1	TNF	0.000261733	0.0014763	-0.0198886	-0.0332253	0.00033389	0.000166945	3.86397e-07	-0.026557	Endothelial - Endothelial	Endothelial - BTLA - VTCN1 - Endothelial	Endothelial - BTLA	VTCN1 - Endothelial	human
Endothelial	Endothelial	C1QA	CD93	C1QA - CD93	Vasoactive	0	1.85847	0	0.66672	0	0.782638	0	0.33336	Endothelial - Endothelial	Endothelial - C1QA - CD93 - Endothelial	Endothelial - C1QA	CD93 - Endothelial	human
Endothelial	Endothelial	C1QA	CR1	C1QA - CR1	Vasoactive	0	0.00053528	0	-0.00740047	0	0.000166945	0	-0.00370024	Endothelial - Endothelial	Endothelial - C1QA - CR1 - Endothelial	Endothelial - C1QA	CR1 - Endothelial	human
Endothelial	Endothelial	C1QA	CSPG4	C1QA - CSPG4	Vasoactive	0	0.00505652	0	-0.111218	0	0.00283806	0	-0.0556089	Endothelial - Endothelial	Endothelial - C1QA - CSPG4 - Endothelial	Endothelial - C1QA	CSPG4 - Endothelial	human
Endothelial	Endothelial	C1QB	LRP1	C1QB - LRP1	Vasoactive	NA	0.0314119	NA	-0.211875	NA	0.0130217	NA	NA	Endothelial - Endothelial	Endothelial - C1QB - LRP1 - Endothelial	Endothelial - C1QB	LRP1 - Endothelial	human
Endothelial	Endothelial	C1QTNF1	AVPR2	C1QTNF1 - AVPR2	TNF	0.0215369	0.000742289	-0.141947	-0.0110401	0.00984975	0.00033389	1.59866e-05	-0.0764937	Endothelial - Endothelial	Endothelial - C1QTNF1 - AVPR2 - Endothelial	Endothelial - C1QTNF1	AVPR2 - Endothelial	human
Endothelial	Endothelial	C1QTNF5	MFRP	C1QTNF5 - MFRP	TNF	0	NA	0	NA	0	NA	NA	NA	Endothelial - Endothelial	Endothelial - C1QTNF5 - MFRP - Endothelial	Endothelial - C1QTNF5	MFRP - Endothelial	human
Endothelial	Endothelial	C1orf112	PLSCR4	C1orf112 - PLSCR4	UNCAT	0.0325079	0.426289	-0.0405644	0.185518	0.0173623	0.214858	0.0138578	0.072477	Endothelial - Endothelial	Endothelial - C1orf112 - PLSCR4 - Endothelial	Endothelial - C1orf112	PLSCR4 - Endothelial	human
Endothelial	Endothelial	C1orf194	PLSCR4	C1orf194 - PLSCR4	UNCAT	NA	0.426289	NA	0.185518	NA	0.214858	NA	NA	Endothelial - Endothelial	Endothelial - C1orf194 - PLSCR4 - Endothelial	Endothelial - C1orf194	PLSCR4 - Endothelial	human
Endothelial	Endothelial	C1orf200	LY6G6C	C1orf200 - LY6G6C	UNCAT	NA	0.000294496	NA	-0.0251507	NA	0.000166945	NA	NA	Endothelial - Endothelial	Endothelial - C1orf200 - LY6G6C - Endothelial	Endothelial - C1orf200	LY6G6C - Endothelial	human
Endothelial	Endothelial	C1orf200	SLC16A4	C1orf200 - SLC16A4	UNCAT	NA	0.0594488	NA	-0.0233315	NA	0.0292154	NA	NA	Endothelial - Endothelial	Endothelial - C1orf200 - SLC16A4 - Endothelial	Endothelial - C1orf200	SLC16A4 - Endothelial	human
Endothelial	Endothelial	C3	C3AR1	C3 - C3AR1	Complement	0.0231011	0.00122328	-0.11476	-0.0173985	0.00851419	0.00033389	2.82591e-05	-0.0660794	Endothelial - Endothelial	Endothelial - C3 - C3AR1 - Endothelial	Endothelial - C3	C3AR1 - Endothelial	human
Endothelial	Endothelial	C3	C5AR2	C3 - C5AR2	Complement	0.0231011	0.00232418	-0.11476	-0.0836363	0.00851419	0.000834725	5.36913e-05	-0.0991983	Endothelial - Endothelial	Endothelial - C3 - C5AR2 - Endothelial	Endothelial - C3	C5AR2 - Endothelial	human
Endothelial	Endothelial	C3	CD19	C3 - CD19	Complement	0.0231011	0	-0.11476	0	0.00851419	0	0	-0.0573801	Endothelial - Endothelial	Endothelial - C3 - CD19 - Endothelial	Endothelial - C3	CD19 - Endothelial	human
Endothelial	Endothelial	C3	CD46	C3 - CD46	Complement	0.0231011	0.829178	-0.11476	-0.138775	0.00851419	0.414858	0.019155	-0.126768	Endothelial - Endothelial	Endothelial - C3 - CD46 - Endothelial	Endothelial - C3	CD46 - Endothelial	human
Endothelial	Endothelial	C3	CD81	C3 - CD81	Complement	0.0231011	1.67359	-0.11476	0.132003	0.00851419	0.767613	0.0386619	0.00862128	Endothelial - Endothelial	Endothelial - C3 - CD81 - Endothelial	Endothelial - C3	CD81 - Endothelial	human
Endothelial	Endothelial	C3	CR1	C3 - CR1	Complement	0.0231011	0.00053528	-0.11476	-0.00740047	0.00851419	0.000166945	1.23656e-05	-0.0610803	Endothelial - Endothelial	Endothelial - C3 - CR1 - Endothelial	Endothelial - C3	CR1 - Endothelial	human
Endothelial	Endothelial	C3	IFITM1	C3 - IFITM1	Complement	0.0231011	0.017999	-0.11476	-0.00735704	0.00851419	0.00751252	0.000415797	-0.0610586	Endothelial - Endothelial	Endothelial - C3 - IFITM1 - Endothelial	Endothelial - C3	IFITM1 - Endothelial	human
Endothelial	Endothelial	C3	ITGAM	C3 - ITGAM	Complement	0.0231011	0.000220423	-0.11476	-0.0131065	0.00851419	0.000166945	5.09203e-06	-0.0639334	Endothelial - Endothelial	Endothelial - C3 - ITGAM - Endothelial	Endothelial - C3	ITGAM - Endothelial	human
Endothelial	Endothelial	C3	ITGAX	C3 - ITGAX	Complement	0.0231011	0.000644465	-0.11476	-0.0102294	0.00851419	0.00033389	1.48879e-05	-0.0624948	Endothelial - Endothelial	Endothelial - C3 - ITGAX - Endothelial	Endothelial - C3	ITGAX - Endothelial	human
Endothelial	Endothelial	C3	ITGB2	C3 - ITGB2	Complement	0.0231011	0.0111766	-0.11476	-0.176937	0.00851419	0.00417362	0.000258191	-0.145848	Endothelial - Endothelial	Endothelial - C3 - ITGB2 - Endothelial	Endothelial - C3	ITGB2 - Endothelial	human
Endothelial	Endothelial	C3	LRP1	C3 - LRP1	Complement	0.0231011	0.0314119	-0.11476	-0.211875	0.00851419	0.0130217	0.000725651	-0.163318	Endothelial - Endothelial	Endothelial - C3 - LRP1 - Endothelial	Endothelial - C3	LRP1 - Endothelial	human
Endothelial	Endothelial	C4A	C3AR1	C4A - C3AR1	UNCAT	NA	0.00122328	NA	-0.0173985	NA	0.00033389	NA	NA	Endothelial - Endothelial	Endothelial - C4A - C3AR1 - Endothelial	Endothelial - C4A	C3AR1 - Endothelial	human
Endothelial	Endothelial	C4A	C5AR2	C4A - C5AR2	UNCAT	NA	0.00232418	NA	-0.0836363	NA	0.000834725	NA	NA	Endothelial - Endothelial	Endothelial - C4A - C5AR2 - Endothelial	Endothelial - C4A	C5AR2 - Endothelial	human
Endothelial	Endothelial	C4A	CR1	C4A - CR1	UNCAT	NA	0.00053528	NA	-0.00740047	NA	0.000166945	NA	NA	Endothelial - Endothelial	Endothelial - C4A - CR1 - Endothelial	Endothelial - C4A	CR1 - Endothelial	human
Endothelial	Endothelial	C4BPA	BMPR2	C4BPA - BMPR2	BMP	0.000183157	1.13223	-0.0137062	0.39767	0.000166945	0.550584	0.000207376	0.191982	Endothelial - Endothelial	Endothelial - C4BPA - BMPR2 - Endothelial	Endothelial - C4BPA	BMPR2 - Endothelial	human
Endothelial	Endothelial	C4BPA	CD40	C4BPA - CD40	UNCAT	0.000183157	0.244661	-0.0137062	0.0978256	0.000166945	0.120367	4.48114e-05	0.0420597	Endothelial - Endothelial	Endothelial - C4BPA - CD40 - Endothelial	Endothelial - C4BPA	CD40 - Endothelial	human
Endothelial	Endothelial	C4BPA	LRP1	C4BPA - LRP1	UNCAT	0.000183157	0.0314119	-0.0137062	-0.211875	0.000166945	0.0130217	5.75333e-06	-0.112791	Endothelial - Endothelial	Endothelial - C4BPA - LRP1 - Endothelial	Endothelial - C4BPA	LRP1 - Endothelial	human
Endothelial	Endothelial	C4B	CD46	C4B - CD46	UNCAT	NA	0.829178	NA	-0.138775	NA	0.414858	NA	NA	Endothelial - Endothelial	Endothelial - C4B - CD46 - Endothelial	Endothelial - C4B	CD46 - Endothelial	human
Endothelial	Endothelial	C4B	CR1	C4B - CR1	UNCAT	NA	0.00053528	NA	-0.00740047	NA	0.000166945	NA	NA	Endothelial - Endothelial	Endothelial - C4B - CR1 - Endothelial	Endothelial - C4B	CR1 - Endothelial	human
Endothelial	Endothelial	C5	C5AR1	C5 - C5AR1	Complement	0.00467217	0.00304265	-0.0332786	-0.0583637	0.00217028	0.000500835	1.42158e-05	-0.0458211	Endothelial - Endothelial	Endothelial - C5 - C5AR1 - Endothelial	Endothelial - C5	C5AR1 - Endothelial	human
Endothelial	Endothelial	C5	C5AR2	C5 - C5AR2	Complement	0.00467217	0.00232418	-0.0332786	-0.0836363	0.00217028	0.000834725	1.0859e-05	-0.0584574	Endothelial - Endothelial	Endothelial - C5 - C5AR2 - Endothelial	Endothelial - C5	C5AR2 - Endothelial	human
Endothelial	Endothelial	C5orf55	TRAF2	C5orf55 - TRAF2	TNF	NA	0.0503888	NA	-0.0346637	NA	0.0248748	NA	NA	Endothelial - Endothelial	Endothelial - C5orf55 - TRAF2 - Endothelial	Endothelial - C5orf55	TRAF2 - Endothelial	human
Endothelial	Endothelial	C6orf15	DDR1	C6orf15 - DDR1	UNCAT	0.0160733	0.04846	-0.190145	-0.170533	0.00601002	0.0228715	0.000778912	-0.180339	Endothelial - Endothelial	Endothelial - C6orf15 - DDR1 - Endothelial	Endothelial - C6orf15	DDR1 - Endothelial	human
Endothelial	Endothelial	CALCA	CALCR	CALCA - CALCR	UNCAT	0	NA	-0.00907144	NA	0	NA	NA	NA	Endothelial - Endothelial	Endothelial - CALCA - CALCR - Endothelial	Endothelial - CALCA	CALCR - Endothelial	human
Endothelial	Endothelial	CALCA	CALCRL	CALCA - CALCRL	UNCAT	0	1.65593	-0.00907144	0.616265	0	0.722204	0	0.303597	Endothelial - Endothelial	Endothelial - CALCA - CALCRL - Endothelial	Endothelial - CALCA	CALCRL - Endothelial	human
Endothelial	Endothelial	CALCA	RAMP1	CALCA - RAMP1	UNCAT	0	0.0194183	-0.00907144	-0.286244	0	0.00767947	0	-0.147658	Endothelial - Endothelial	Endothelial - CALCA - RAMP1 - Endothelial	Endothelial - CALCA	RAMP1 - Endothelial	human
Endothelial	Endothelial	CALCA	RAMP2	CALCA - RAMP2	UNCAT	0	1.56596	-0.00907144	0.612675	0	0.701669	0	0.301802	Endothelial - Endothelial	Endothelial - CALCA - RAMP2 - Endothelial	Endothelial - CALCA	RAMP2 - Endothelial	human
Endothelial	Endothelial	CALCB	CALCR	CALCB - CALCR	UNCAT	0	NA	-0.0127885	NA	0	NA	NA	NA	Endothelial - Endothelial	Endothelial - CALCB - CALCR - Endothelial	Endothelial - CALCB	CALCR - Endothelial	human
Endothelial	Endothelial	CALCB	CALCRL	CALCB - CALCRL	UNCAT	0	1.65593	-0.0127885	0.616265	0	0.722204	0	0.301738	Endothelial - Endothelial	Endothelial - CALCB - CALCRL - Endothelial	Endothelial - CALCB	CALCRL - Endothelial	human
Endothelial	Endothelial	CALCB	RAMP1	CALCB - RAMP1	UNCAT	0	0.0194183	-0.0127885	-0.286244	0	0.00767947	0	-0.149516	Endothelial - Endothelial	Endothelial - CALCB - RAMP1 - Endothelial	Endothelial - CALCB	RAMP1 - Endothelial	human
Endothelial	Endothelial	CALR	HLA-F	CALR - HLA-F	Intracellular trafficking	1.7675	0.043162	-0.0913733	0.00138842	0.776294	0.0200334	0.0762891	-0.0449924	Endothelial - Endothelial	Endothelial - CALR - HLA-F - Endothelial	Endothelial - CALR	HLA-F - Endothelial	human
Endothelial	Endothelial	CALR	ITGA2B	CALR - ITGA2B	Intracellular trafficking	1.7675	0.00360779	-0.0913733	-0.0143037	0.776294	0.00133556	0.00637679	-0.0528385	Endothelial - Endothelial	Endothelial - CALR - ITGA2B - Endothelial	Endothelial - CALR	ITGA2B - Endothelial	human
Endothelial	Endothelial	CALR	ITGA3	CALR - ITGA3	Intracellular trafficking	1.7675	0.214703	-0.0913733	-0.363692	0.776294	0.101169	0.379488	-0.227533	Endothelial - Endothelial	Endothelial - CALR - ITGA3 - Endothelial	Endothelial - CALR	ITGA3 - Endothelial	human
Endothelial	Endothelial	CALR	ITGAV	CALR - ITGAV	Intracellular trafficking	1.7675	0.857661	-0.0913733	0.117173	0.776294	0.425543	1.51592	0.0128996	Endothelial - Endothelial	Endothelial - CALR - ITGAV - Endothelial	Endothelial - CALR	ITGAV - Endothelial	human
Endothelial	Endothelial	CALR	LRP1	CALR - LRP1	Intracellular trafficking	1.7675	0.0314119	-0.0913733	-0.211875	0.776294	0.0130217	0.0555207	-0.151624	Endothelial - Endothelial	Endothelial - CALR - LRP1 - Endothelial	Endothelial - CALR	LRP1 - Endothelial	human
Endothelial	Endothelial	CALR	MTNR1A	CALR - MTNR1A	Intracellular trafficking	1.7675	NA	-0.0913733	NA	0.776294	NA	NA	NA	Endothelial - Endothelial	Endothelial - CALR - MTNR1A - Endothelial	Endothelial - CALR	MTNR1A - Endothelial	human
Endothelial	Endothelial	CALR	SCARF1	CALR - SCARF1	Intracellular trafficking	1.7675	0.28617	-0.0913733	0.229057	0.776294	0.148414	0.505808	0.0688417	Endothelial - Endothelial	Endothelial - CALR - SCARF1 - Endothelial	Endothelial - CALR	SCARF1 - Endothelial	human
Endothelial	Endothelial	CALR	TSHR	CALR - TSHR	Intracellular trafficking	1.7675	0	-0.0913733	-0.0118532	0.776294	0	0	-0.0516133	Endothelial - Endothelial	Endothelial - CALR - TSHR - Endothelial	Endothelial - CALR	TSHR - Endothelial	human
Endothelial	Endothelial	CAMP	EGFR	CAMP - EGFR	EGF	0	0.0549946	0	-0.344129	0	0.0245409	0	-0.172065	Endothelial - Endothelial	Endothelial - CAMP - EGFR - Endothelial	Endothelial - CAMP	EGFR - Endothelial	human
Endothelial	Endothelial	CAMP	FPR2	CAMP - FPR2	Chemotaxis	0	0	0	0	0	0	0	0	Endothelial - Endothelial	Endothelial - CAMP - FPR2 - Endothelial	Endothelial - CAMP	FPR2 - Endothelial	human
Endothelial	Endothelial	CAMP	IGF1R	CAMP - IGF1R	UNCAT	0	0.288791	0	0.105434	0	0.15192	0	0.0527169	Endothelial - Endothelial	Endothelial - CAMP - IGF1R - Endothelial	Endothelial - CAMP	IGF1R - Endothelial	human
Endothelial	Endothelial	CAMP	P2RX7	CAMP - P2RX7	UNCAT	0	0.00566129	0	-0.00872969	0	0.0033389	0	-0.00436484	Endothelial - Endothelial	Endothelial - CAMP - P2RX7 - Endothelial	Endothelial - CAMP	P2RX7 - Endothelial	human
Endothelial	Endothelial	CCK	CCKAR	CCK - CCKAR	UNCAT	0.0016828	NA	-0.0452805	NA	0.000500835	NA	NA	NA	Endothelial - Endothelial	Endothelial - CCK - CCKAR - Endothelial	Endothelial - CCK	CCKAR - Endothelial	human
Endothelial	Endothelial	CCK	CCKBR	CCK - CCKBR	UNCAT	0.0016828	NA	-0.0452805	NA	0.000500835	NA	NA	NA	Endothelial - Endothelial	Endothelial - CCK - CCKBR - Endothelial	Endothelial - CCK	CCKBR - Endothelial	human
Endothelial	Endothelial	CCL11	ACKR2	CCL11 - ACKR2	CC	0	0.000764392	0	-0.0301821	0	0.00033389	0	-0.015091	Endothelial - Endothelial	Endothelial - CCL11 - ACKR2 - Endothelial	Endothelial - CCL11	ACKR2 - Endothelial	human
Endothelial	Endothelial	CCL11	ACKR4	CCL11 - ACKR4	CC	0	0.17573	0	0.159432	0	0.0714524	0	0.0797162	Endothelial - Endothelial	Endothelial - CCL11 - ACKR4 - Endothelial	Endothelial - CCL11	ACKR4 - Endothelial	human
Endothelial	Endothelial	CCL11	CCR2	CCL11 - CCR2	CC	0	NA	0	NA	0	NA	NA	NA	Endothelial - Endothelial	Endothelial - CCL11 - CCR2 - Endothelial	Endothelial - CCL11	CCR2 - Endothelial	human
Endothelial	Endothelial	CCL11	CCR3	CCL11 - CCR3	CC	0	NA	0	NA	0	NA	NA	NA	Endothelial - Endothelial	Endothelial - CCL11 - CCR3 - Endothelial	Endothelial - CCL11	CCR3 - Endothelial	human
Endothelial	Endothelial	CCL11	CCR5	CCL11 - CCR5	CC	0	NA	0	NA	0	NA	NA	NA	Endothelial - Endothelial	Endothelial - CCL11 - CCR5 - Endothelial	Endothelial - CCL11	CCR5 - Endothelial	human
Endothelial	Endothelial	CCL11	CXCR3	CCL11 - CXCR3	CC	0	0	0	-0.0523466	0	0	0	-0.0261733	Endothelial - Endothelial	Endothelial - CCL11 - CXCR3 - Endothelial	Endothelial - CCL11	CXCR3 - Endothelial	human
Endothelial	Endothelial	CCL13	ACKR2	CCL13 - ACKR2	CC	0.000997972	0.000764392	-0.0329247	-0.0301821	0.00066778	0.00033389	7.62842e-07	-0.0315534	Endothelial - Endothelial	Endothelial - CCL13 - ACKR2 - Endothelial	Endothelial - CCL13	ACKR2 - Endothelial	human
Endothelial	Endothelial	CCL13	ACKR4	CCL13 - ACKR4	CC	0.000997972	0.17573	-0.0329247	0.159432	0.00066778	0.0714524	0.000175373	0.0632538	Endothelial - Endothelial	Endothelial - CCL13 - ACKR4 - Endothelial	Endothelial - CCL13	ACKR4 - Endothelial	human
Endothelial	Endothelial	CCL13	CCR1	CCL13 - CCR1	CC	0.000997972	0	-0.0329247	-0.041607	0.00066778	0	0	-0.0372658	Endothelial - Endothelial	Endothelial - CCL13 - CCR1 - Endothelial	Endothelial - CCL13	CCR1 - Endothelial	human
Endothelial	Endothelial	CCL13	CCR2	CCL13 - CCR2	CC	0.000997972	NA	-0.0329247	NA	0.00066778	NA	NA	NA	Endothelial - Endothelial	Endothelial - CCL13 - CCR2 - Endothelial	Endothelial - CCL13	CCR2 - Endothelial	human
Endothelial	Endothelial	CCL13	CCR3	CCL13 - CCR3	CC	0.000997972	NA	-0.0329247	NA	0.00066778	NA	NA	NA	Endothelial - Endothelial	Endothelial - CCL13 - CCR3 - Endothelial	Endothelial - CCL13	CCR3 - Endothelial	human
Endothelial	Endothelial	CCL13	CCR5	CCL13 - CCR5	CC	0.000997972	NA	-0.0329247	NA	0.00066778	NA	NA	NA	Endothelial - Endothelial	Endothelial - CCL13 - CCR5 - Endothelial	Endothelial - CCL13	CCR5 - Endothelial	human
Endothelial	Endothelial	CCL13	CCR9	CCL13 - CCR9	CC	0.000997972	NA	-0.0329247	NA	0.00066778	NA	NA	NA	Endothelial - Endothelial	Endothelial - CCL13 - CCR9 - Endothelial	Endothelial - CCL13	CCR9 - Endothelial	human
Endothelial	Endothelial	CCL13	CXCR3	CCL13 - CXCR3	CC	0.000997972	0	-0.0329247	-0.0523466	0.00066778	0	0	-0.0426356	Endothelial - Endothelial	Endothelial - CCL13 - CXCR3 - Endothelial	Endothelial - CCL13	CXCR3 - Endothelial	human
Endothelial	Endothelial	CCL14	ACKR2	CCL14 - ACKR2	CC	2.3125	0.000764392	0.671381	-0.0301821	0.807846	0.00033389	0.00176766	0.3206	Endothelial - Endothelial	Endothelial - CCL14 - ACKR2 - Endothelial	Endothelial - CCL14	ACKR2 - Endothelial	human
Endothelial	Endothelial	CCL14	CCR1	CCL14 - CCR1	CC	2.3125	0	0.671381	-0.041607	0.807846	0	0	0.314887	Endothelial - Endothelial	Endothelial - CCL14 - CCR1 - Endothelial	Endothelial - CCL14	CCR1 - Endothelial	human
Endothelial	Endothelial	CCL14	CCR3	CCL14 - CCR3	CC	2.3125	NA	0.671381	NA	0.807846	NA	NA	NA	Endothelial - Endothelial	Endothelial - CCL14 - CCR3 - Endothelial	Endothelial - CCL14	CCR3 - Endothelial	human
Endothelial	Endothelial	CCL14	CCR5	CCL14 - CCR5	CC	2.3125	NA	0.671381	NA	0.807846	NA	NA	NA	Endothelial - Endothelial	Endothelial - CCL14 - CCR5 - Endothelial	Endothelial - CCL14	CCR5 - Endothelial	human
Endothelial	Endothelial	CCL15	CCR1	CCL15 - CCR1	CC	0.00558571	0	-0.0185197	-0.041607	0.00233723	0	0	-0.0300634	Endothelial - Endothelial	Endothelial - CCL15 - CCR1 - Endothelial	Endothelial - CCL15	CCR1 - Endothelial	human
Endothelial	Endothelial	CCL15	CCR3	CCL15 - CCR3	CC	0.00558571	NA	-0.0185197	NA	0.00233723	NA	NA	NA	Endothelial - Endothelial	Endothelial - CCL15 - CCR3 - Endothelial	Endothelial - CCL15	CCR3 - Endothelial	human
Endothelial	Endothelial	CCL16	CCR1	CCL16 - CCR1	CC	0.0269591	0	0.0335765	-0.041607	0.012187	0	0	-0.00401525	Endothelial - Endothelial	Endothelial - CCL16 - CCR1 - Endothelial	Endothelial - CCL16	CCR1 - Endothelial	human
Endothelial	Endothelial	CCL16	CCR2	CCL16 - CCR2	CC	0.0269591	NA	0.0335765	NA	0.012187	NA	NA	NA	Endothelial - Endothelial	Endothelial - CCL16 - CCR2 - Endothelial	Endothelial - CCL16	CCR2 - Endothelial	human
Endothelial	Endothelial	CCL16	CCR5	CCL16 - CCR5	CC	0.0269591	NA	0.0335765	NA	0.012187	NA	NA	NA	Endothelial - Endothelial	Endothelial - CCL16 - CCR5 - Endothelial	Endothelial - CCL16	CCR5 - Endothelial	human
Endothelial	Endothelial	CCL16	CCR8	CCL16 - CCR8	CC	0.0269591	NA	0.0335765	NA	0.012187	NA	NA	NA	Endothelial - Endothelial	Endothelial - CCL16 - CCR8 - Endothelial	Endothelial - CCL16	CCR8 - Endothelial	human
Endothelial	Endothelial	CCL16	HRH4	CCL16 - HRH4	CC	0.0269591	0.00029233	0.0335765	-0.0107992	0.012187	0.000166945	7.88096e-06	0.0113887	Endothelial - Endothelial	Endothelial - CCL16 - HRH4 - Endothelial	Endothelial - CCL16	HRH4 - Endothelial	human
Endothelial	Endothelial	CCL17	CCR4	CCL17 - CCR4	CC	0.000399215	0	-0.0152881	0	0.000166945	0	0	-0.00764406	Endothelial - Endothelial	Endothelial - CCL17 - CCR4 - Endothelial	Endothelial - CCL17	CCR4 - Endothelial	human
Endothelial	Endothelial	CCL17	CCR8	CCL17 - CCR8	CC	0.000399215	NA	-0.0152881	NA	0.000166945	NA	NA	NA	Endothelial - Endothelial	Endothelial - CCL17 - CCR8 - Endothelial	Endothelial - CCL17	CCR8 - Endothelial	human
Endothelial	Endothelial	CCL17	DARC	CCL17 - DARC	CC	0.000399215	NA	-0.0152881	NA	0.000166945	NA	NA	NA	Endothelial - Endothelial	Endothelial - CCL17 - DARC - Endothelial	Endothelial - CCL17	DARC - Endothelial	human
Endothelial	Endothelial	CCL18	C14orf1	CCL18 - C14orf1	CC	NA	NA	NA	NA	NA	NA	NA	NA	Endothelial - Endothelial	Endothelial - CCL18 - C14orf1 - Endothelial	Endothelial - CCL18	C14orf1 - Endothelial	human
Endothelial	Endothelial	CCL19	ACKR2	CCL19 - ACKR2	CC	NA	0.000764392	NA	-0.0301821	NA	0.00033389	NA	NA	Endothelial - Endothelial	Endothelial - CCL19 - ACKR2 - Endothelial	Endothelial - CCL19	ACKR2 - Endothelial	human
Endothelial	Endothelial	CCL19	ACKR4	CCL19 - ACKR4	CC	NA	0.17573	NA	0.159432	NA	0.0714524	NA	NA	Endothelial - Endothelial	Endothelial - CCL19 - ACKR4 - Endothelial	Endothelial - CCL19	ACKR4 - Endothelial	human
Endothelial	Endothelial	CCL19	CCR10	CCL19 - CCR10	CC	NA	0.018162	NA	-0.0130639	NA	0.0110184	NA	NA	Endothelial - Endothelial	Endothelial - CCL19 - CCR10 - Endothelial	Endothelial - CCL19	CCR10 - Endothelial	human
Endothelial	Endothelial	CCL19	CCR7	CCL19 - CCR7	CC	NA	0.0015536	NA	-0.0160232	NA	0.00066778	NA	NA	Endothelial - Endothelial	Endothelial - CCL19 - CCR7 - Endothelial	Endothelial - CCL19	CCR7 - Endothelial	human
Endothelial	Endothelial	CCL19	CCRL2	CCL19 - CCRL2	CC	NA	0.0713113	NA	0.0698757	NA	0.0340568	NA	NA	Endothelial - Endothelial	Endothelial - CCL19 - CCRL2 - Endothelial	Endothelial - CCL19	CCRL2 - Endothelial	human
Endothelial	Endothelial	CCL19	CXCR3	CCL19 - CXCR3	CC	NA	0	NA	-0.0523466	NA	0	NA	NA	Endothelial - Endothelial	Endothelial - CCL19 - CXCR3 - Endothelial	Endothelial - CCL19	CXCR3 - Endothelial	human
Endothelial	Endothelial	CCL1	CCR8	CCL1 - CCR8	CC	0.00109189	NA	-0.0118429	NA	0.00033389	NA	NA	NA	Endothelial - Endothelial	Endothelial - CCL1 - CCR8 - Endothelial	Endothelial - CCL1	CCR8 - Endothelial	human
Endothelial	Endothelial	CCL20	CCR6	CCL20 - CCR6	CC	0.0468894	0.000260086	-0.125987	-0.0131982	0.0161937	0.000166945	1.21953e-05	-0.0695927	Endothelial - Endothelial	Endothelial - CCL20 - CCR6 - Endothelial	Endothelial - CCL20	CCR6 - Endothelial	human
Endothelial	Endothelial	CCL20	CXCR3	CCL20 - CXCR3	CC	0.0468894	0	-0.125987	-0.0523466	0.0161937	0	0	-0.0891668	Endothelial - Endothelial	Endothelial - CCL20 - CXCR3 - Endothelial	Endothelial - CCL20	CXCR3 - Endothelial	human
Endothelial	Endothelial	CCL21	ACKR2	CCL21 - ACKR2	CC	0.00129982	0.000764392	-0.0105244	-0.0301821	0.00066778	0.00033389	9.93573e-07	-0.0203532	Endothelial - Endothelial	Endothelial - CCL21 - ACKR2 - Endothelial	Endothelial - CCL21	ACKR2 - Endothelial	human
Endothelial	Endothelial	CCL21	ACKR4	CCL21 - ACKR4	CC	0.00129982	0.17573	-0.0105244	0.159432	0.00066778	0.0714524	0.000228417	0.074454	Endothelial - Endothelial	Endothelial - CCL21 - ACKR4 - Endothelial	Endothelial - CCL21	ACKR4 - Endothelial	human
Endothelial	Endothelial	CCL21	CCR7	CCL21 - CCR7	CC	0.00129982	0.0015536	-0.0105244	-0.0160232	0.00066778	0.00066778	2.0194e-06	-0.0132738	Endothelial - Endothelial	Endothelial - CCL21 - CCR7 - Endothelial	Endothelial - CCL21	CCR7 - Endothelial	human
Endothelial	Endothelial	CCL21	CXCR3	CCL21 - CXCR3	CC	0.00129982	0	-0.0105244	-0.0523466	0.00066778	0	0	-0.0314355	Endothelial - Endothelial	Endothelial - CCL21 - CXCR3 - Endothelial	Endothelial - CCL21	CXCR3 - Endothelial	human
Endothelial	Endothelial	CCL22	CCR4	CCL22 - CCR4	CC	0	0	-0.036023	0	0	0	0	-0.0180115	Endothelial - Endothelial	Endothelial - CCL22 - CCR4 - Endothelial	Endothelial - CCL22	CCR4 - Endothelial	human
Endothelial	Endothelial	CCL23	CCR1	CCL23 - CCR1	CC	0.0346869	0	0.0598228	-0.041607	0.0175292	0	0	0.00910786	Endothelial - Endothelial	Endothelial - CCL23 - CCR1 - Endothelial	Endothelial - CCL23	CCR1 - Endothelial	human
Endothelial	Endothelial	CCL24	CCR2	CCL24 - CCR2	CC	NA	NA	NA	NA	NA	NA	NA	NA	Endothelial - Endothelial	Endothelial - CCL24 - CCR2 - Endothelial	Endothelial - CCL24	CCR2 - Endothelial	human
Endothelial	Endothelial	CCL24	CCR3	CCL24 - CCR3	CC	NA	NA	NA	NA	NA	NA	NA	NA	Endothelial - Endothelial	Endothelial - CCL24 - CCR3 - Endothelial	Endothelial - CCL24	CCR3 - Endothelial	human
Endothelial	Endothelial	CCL25	ACKR2	CCL25 - ACKR2	CC	NA	0.000764392	NA	-0.0301821	NA	0.00033389	NA	NA	Endothelial - Endothelial	Endothelial - CCL25 - ACKR2 - Endothelial	Endothelial - CCL25	ACKR2 - Endothelial	human
Endothelial	Endothelial	CCL25	ACKR4	CCL25 - ACKR4	CC	NA	0.17573	NA	0.159432	NA	0.0714524	NA	NA	Endothelial - Endothelial	Endothelial - CCL25 - ACKR4 - Endothelial	Endothelial - CCL25	ACKR4 - Endothelial	human
Endothelial	Endothelial	CCL25	CCR10	CCL25 - CCR10	CC	NA	0.018162	NA	-0.0130639	NA	0.0110184	NA	NA	Endothelial - Endothelial	Endothelial - CCL25 - CCR10 - Endothelial	Endothelial - CCL25	CCR10 - Endothelial	human
Endothelial	Endothelial	CCL25	CCR9	CCL25 - CCR9	CC	NA	NA	NA	NA	NA	NA	NA	NA	Endothelial - Endothelial	Endothelial - CCL25 - CCR9 - Endothelial	Endothelial - CCL25	CCR9 - Endothelial	human
Endothelial	Endothelial	CCL26	CCR1	CCL26 - CCR1	CC	0.00407027	0	-0.0605196	-0.041607	0.00166945	0	0	-0.0510633	Endothelial - Endothelial	Endothelial - CCL26 - CCR1 - Endothelial	Endothelial - CCL26	CCR1 - Endothelial	human
Endothelial	Endothelial	CCL26	CCR2	CCL26 - CCR2	CC	0.00407027	NA	-0.0605196	NA	0.00166945	NA	NA	NA	Endothelial - Endothelial	Endothelial - CCL26 - CCR2 - Endothelial	Endothelial - CCL26	CCR2 - Endothelial	human
Endothelial	Endothelial	CCL26	CCR3	CCL26 - CCR3	CC	0.00407027	NA	-0.0605196	NA	0.00166945	NA	NA	NA	Endothelial - Endothelial	Endothelial - CCL26 - CCR3 - Endothelial	Endothelial - CCL26	CCR3 - Endothelial	human
Endothelial	Endothelial	CCL27	ACKR2	CCL27 - ACKR2	CC	0.000720573	0.000764392	-0.0117185	-0.0301821	0.000166945	0.00033389	5.50801e-07	-0.0209503	Endothelial - Endothelial	Endothelial - CCL27 - ACKR2 - Endothelial	Endothelial - CCL27	ACKR2 - Endothelial	human
Endothelial	Endothelial	CCL27	CCR10	CCL27 - CCR10	CC	0.000720573	0.018162	-0.0117185	-0.0130639	0.000166945	0.0110184	1.3087e-05	-0.0123912	Endothelial - Endothelial	Endothelial - CCL27 - CCR10 - Endothelial	Endothelial - CCL27	CCR10 - Endothelial	human
Endothelial	Endothelial	CCL28	ACKR2	CCL28 - ACKR2	CC	0.00345903	0.000764392	-0.128063	-0.0301821	0.00183639	0.00033389	2.64406e-06	-0.0791227	Endothelial - Endothelial	Endothelial - CCL28 - ACKR2 - Endothelial	Endothelial - CCL28	ACKR2 - Endothelial	human
Endothelial	Endothelial	CCL28	CCR10	CCL28 - CCR10	CC	0.00345903	0.018162	-0.128063	-0.0130639	0.00183639	0.0110184	6.28228e-05	-0.0705636	Endothelial - Endothelial	Endothelial - CCL28 - CCR10 - Endothelial	Endothelial - CCL28	CCR10 - Endothelial	human
Endothelial	Endothelial	CCL28	CCR3	CCL28 - CCR3	CC	0.00345903	NA	-0.128063	NA	0.00183639	NA	NA	NA	Endothelial - Endothelial	Endothelial - CCL28 - CCR3 - Endothelial	Endothelial - CCL28	CCR3 - Endothelial	human
Endothelial	Endothelial	CCL2	ACKR2	CCL2 - ACKR2	CC	1.69946	0.000764392	0.317891	-0.0301821	0.405175	0.00033389	0.00129905	0.143855	Endothelial - Endothelial	Endothelial - CCL2 - ACKR2 - Endothelial	Endothelial - CCL2	ACKR2 - Endothelial	human
Endothelial	Endothelial	CCL2	ACKR4	CCL2 - ACKR4	CC	1.69946	0.17573	0.317891	0.159432	0.405175	0.0714524	0.298645	0.238662	Endothelial - Endothelial	Endothelial - CCL2 - ACKR4 - Endothelial	Endothelial - CCL2	ACKR4 - Endothelial	human
Endothelial	Endothelial	CCL2	CCR1	CCL2 - CCR1	CC	1.69946	0	0.317891	-0.041607	0.405175	0	0	0.138142	Endothelial - Endothelial	Endothelial - CCL2 - CCR1 - Endothelial	Endothelial - CCL2	CCR1 - Endothelial	human
Endothelial	Endothelial	CCL2	CCR10	CCL2 - CCR10	CC	1.69946	0.018162	0.317891	-0.0130639	0.405175	0.0110184	0.0308656	0.152414	Endothelial - Endothelial	Endothelial - CCL2 - CCR10 - Endothelial	Endothelial - CCL2	CCR10 - Endothelial	human
Endothelial	Endothelial	CCL2	CCR2	CCL2 - CCR2	CC	1.69946	NA	0.317891	NA	0.405175	NA	NA	NA	Endothelial - Endothelial	Endothelial - CCL2 - CCR2 - Endothelial	Endothelial - CCL2	CCR2 - Endothelial	human
Endothelial	Endothelial	CCL2	CCR3	CCL2 - CCR3	CC	1.69946	NA	0.317891	NA	0.405175	NA	NA	NA	Endothelial - Endothelial	Endothelial - CCL2 - CCR3 - Endothelial	Endothelial - CCL2	CCR3 - Endothelial	human
Endothelial	Endothelial	CCL2	CCR4	CCL2 - CCR4	CC	1.69946	0	0.317891	0	0.405175	0	0	0.158946	Endothelial - Endothelial	Endothelial - CCL2 - CCR4 - Endothelial	Endothelial - CCL2	CCR4 - Endothelial	human
Endothelial	Endothelial	CCL2	CCR5	CCL2 - CCR5	CC	1.69946	NA	0.317891	NA	0.405175	NA	NA	NA	Endothelial - Endothelial	Endothelial - CCL2 - CCR5 - Endothelial	Endothelial - CCL2	CCR5 - Endothelial	human
Endothelial	Endothelial	CCL2	DARC	CCL2 - DARC	CC	1.69946	NA	0.317891	NA	0.405175	NA	NA	NA	Endothelial - Endothelial	Endothelial - CCL2 - DARC - Endothelial	Endothelial - CCL2	DARC - Endothelial	human
Endothelial	Endothelial	CCL3L1	CCR1	CCL3L1 - CCR1	CC	0	0	0	-0.041607	0	0	0	-0.0208035	Endothelial - Endothelial	Endothelial - CCL3L1 - CCR1 - Endothelial	Endothelial - CCL3L1	CCR1 - Endothelial	human
Endothelial	Endothelial	CCL3L1	CCR3	CCL3L1 - CCR3	CC	0	NA	0	NA	0	NA	NA	NA	Endothelial - Endothelial	Endothelial - CCL3L1 - CCR3 - Endothelial	Endothelial - CCL3L1	CCR3 - Endothelial	human
Endothelial	Endothelial	CCL3L1	CCR5	CCL3L1 - CCR5	CC	0	NA	0	NA	0	NA	NA	NA	Endothelial - Endothelial	Endothelial - CCL3L1 - CCR5 - Endothelial	Endothelial - CCL3L1	CCR5 - Endothelial	human
Endothelial	Endothelial	CCL3L3	ACKR2	CCL3L3 - ACKR2	CC	NA	0.000764392	NA	-0.0301821	NA	0.00033389	NA	NA	Endothelial - Endothelial	Endothelial - CCL3L3 - ACKR2 - Endothelial	Endothelial - CCL3L3	ACKR2 - Endothelial	human
Endothelial	Endothelial	CCL3L3	CCR5	CCL3L3 - CCR5	CC	NA	NA	NA	NA	NA	NA	NA	NA	Endothelial - Endothelial	Endothelial - CCL3L3 - CCR5 - Endothelial	Endothelial - CCL3L3	CCR5 - Endothelial	human
Endothelial	Endothelial	CCL3	ACKR2	CCL3 - ACKR2	CC	NA	0.000764392	NA	-0.0301821	NA	0.00033389	NA	NA	Endothelial - Endothelial	Endothelial - CCL3 - ACKR2 - Endothelial	Endothelial - CCL3	ACKR2 - Endothelial	human
Endothelial	Endothelial	CCL3	CCR1	CCL3 - CCR1	CC	NA	0	NA	-0.041607	NA	0	NA	NA	Endothelial - Endothelial	Endothelial - CCL3 - CCR1 - Endothelial	Endothelial - CCL3	CCR1 - Endothelial	human
Endothelial	Endothelial	CCL3	CCR3	CCL3 - CCR3	CC	NA	NA	NA	NA	NA	NA	NA	NA	Endothelial - Endothelial	Endothelial - CCL3 - CCR3 - Endothelial	Endothelial - CCL3	CCR3 - Endothelial	human
Endothelial	Endothelial	CCL3	CCR4	CCL3 - CCR4	CC	NA	0	NA	0	NA	0	NA	NA	Endothelial - Endothelial	Endothelial - CCL3 - CCR4 - Endothelial	Endothelial - CCL3	CCR4 - Endothelial	human
Endothelial	Endothelial	CCL3	CCR5	CCL3 - CCR5	CC	NA	NA	NA	NA	NA	NA	NA	NA	Endothelial - Endothelial	Endothelial - CCL3 - CCR5 - Endothelial	Endothelial - CCL3	CCR5 - Endothelial	human
Endothelial	Endothelial	CCL4	ACKR2	CCL4 - ACKR2	CC	0	0.000764392	0	-0.0301821	0	0.00033389	0	-0.015091	Endothelial - Endothelial	Endothelial - CCL4 - ACKR2 - Endothelial	Endothelial - CCL4	ACKR2 - Endothelial	human
Endothelial	Endothelial	CCL4	CCR1	CCL4 - CCR1	CC	0	0	0	-0.041607	0	0	0	-0.0208035	Endothelial - Endothelial	Endothelial - CCL4 - CCR1 - Endothelial	Endothelial - CCL4	CCR1 - Endothelial	human
Endothelial	Endothelial	CCL4	CCR3	CCL4 - CCR3	CC	0	NA	0	NA	0	NA	NA	NA	Endothelial - Endothelial	Endothelial - CCL4 - CCR3 - Endothelial	Endothelial - CCL4	CCR3 - Endothelial	human
Endothelial	Endothelial	CCL4	CCR5	CCL4 - CCR5	CC	0	NA	0	NA	0	NA	NA	NA	Endothelial - Endothelial	Endothelial - CCL4 - CCR5 - Endothelial	Endothelial - CCL4	CCR5 - Endothelial	human
Endothelial	Endothelial	CCL4	CCR8	CCL4 - CCR8	CC	0	NA	0	NA	0	NA	NA	NA	Endothelial - Endothelial	Endothelial - CCL4 - CCR8 - Endothelial	Endothelial - CCL4	CCR8 - Endothelial	human
Endothelial	Endothelial	CCL5	ACKR2	CCL5 - ACKR2	CC	0.00156013	0.000764392	-0.0230365	-0.0301821	0.0015025	0.00033389	1.19255e-06	-0.0266093	Endothelial - Endothelial	Endothelial - CCL5 - ACKR2 - Endothelial	Endothelial - CCL5	ACKR2 - Endothelial	human
Endothelial	Endothelial	CCL5	ACKR4	CCL5 - ACKR4	CC	0.00156013	0.17573	-0.0230365	0.159432	0.0015025	0.0714524	0.000274161	0.0681979	Endothelial - Endothelial	Endothelial - CCL5 - ACKR4 - Endothelial	Endothelial - CCL5	ACKR4 - Endothelial	human
Endothelial	Endothelial	CCL5	CCR1	CCL5 - CCR1	CC	0.00156013	0	-0.0230365	-0.041607	0.0015025	0	0	-0.0323218	Endothelial - Endothelial	Endothelial - CCL5 - CCR1 - Endothelial	Endothelial - CCL5	CCR1 - Endothelial	human
Endothelial	Endothelial	CCL5	CCR3	CCL5 - CCR3	CC	0.00156013	NA	-0.0230365	NA	0.0015025	NA	NA	NA	Endothelial - Endothelial	Endothelial - CCL5 - CCR3 - Endothelial	Endothelial - CCL5	CCR3 - Endothelial	human
Endothelial	Endothelial	CCL5	CCR4	CCL5 - CCR4	CC	0.00156013	0	-0.0230365	0	0.0015025	0	0	-0.0115183	Endothelial - Endothelial	Endothelial - CCL5 - CCR4 - Endothelial	Endothelial - CCL5	CCR4 - Endothelial	human
Endothelial	Endothelial	CCL5	CCR5	CCL5 - CCR5	CC	0.00156013	NA	-0.0230365	NA	0.0015025	NA	NA	NA	Endothelial - Endothelial	Endothelial - CCL5 - CCR5 - Endothelial	Endothelial - CCL5	CCR5 - Endothelial	human
Endothelial	Endothelial	CCL5	CXCR3	CCL5 - CXCR3	CC	0.00156013	0	-0.0230365	-0.0523466	0.0015025	0	0	-0.0376916	Endothelial - Endothelial	Endothelial - CCL5 - CXCR3 - Endothelial	Endothelial - CCL5	CXCR3 - Endothelial	human
Endothelial	Endothelial	CCL5	DARC	CCL5 - DARC	CC	0.00156013	NA	-0.0230365	NA	0.0015025	NA	NA	NA	Endothelial - Endothelial	Endothelial - CCL5 - DARC - Endothelial	Endothelial - CCL5	DARC - Endothelial	human
Endothelial	Endothelial	CCL5	GPR75	CCL5 - GPR75	CC	0.00156013	0.00223373	-0.0230365	-0.0244689	0.0015025	0.00100167	3.48491e-06	-0.0237527	Endothelial - Endothelial	Endothelial - CCL5 - GPR75 - Endothelial	Endothelial - CCL5	GPR75 - Endothelial	human
Endothelial	Endothelial	CCL5	SDC1	CCL5 - SDC1	CC	0.00156013	0.0350433	-0.0230365	-0.278519	0.0015025	0.0128548	5.46721e-05	-0.150778	Endothelial - Endothelial	Endothelial - CCL5 - SDC1 - Endothelial	Endothelial - CCL5	SDC1 - Endothelial	human
Endothelial	Endothelial	CCL5	SDC4	CCL5 - SDC4	CC	0.00156013	0.143708	-0.0230365	-0.386803	0.0015025	0.0676127	0.000224203	-0.20492	Endothelial - Endothelial	Endothelial - CCL5 - SDC4 - Endothelial	Endothelial - CCL5	SDC4 - Endothelial	human
Endothelial	Endothelial	CCL7	ACKR2	CCL7 - ACKR2	CC	0.0097542	0.000764392	-0.0098419	-0.0301821	0.00534224	0.00033389	7.45603e-06	-0.020012	Endothelial - Endothelial	Endothelial - CCL7 - ACKR2 - Endothelial	Endothelial - CCL7	ACKR2 - Endothelial	human
Endothelial	Endothelial	CCL7	ACKR4	CCL7 - ACKR4	CC	0.0097542	0.17573	-0.0098419	0.159432	0.00534224	0.0714524	0.0017141	0.0747952	Endothelial - Endothelial	Endothelial - CCL7 - ACKR4 - Endothelial	Endothelial - CCL7	ACKR4 - Endothelial	human
Endothelial	Endothelial	CCL7	CCR1	CCL7 - CCR1	CC	0.0097542	0	-0.0098419	-0.041607	0.00534224	0	0	-0.0257245	Endothelial - Endothelial	Endothelial - CCL7 - CCR1 - Endothelial	Endothelial - CCL7	CCR1 - Endothelial	human
Endothelial	Endothelial	CCL7	CCR10	CCL7 - CCR10	CC	0.0097542	0.018162	-0.0098419	-0.0130639	0.00534224	0.0110184	0.000177156	-0.0114529	Endothelial - Endothelial	Endothelial - CCL7 - CCR10 - Endothelial	Endothelial - CCL7	CCR10 - Endothelial	human
Endothelial	Endothelial	CCL7	CCR2	CCL7 - CCR2	CC	0.0097542	NA	-0.0098419	NA	0.00534224	NA	NA	NA	Endothelial - Endothelial	Endothelial - CCL7 - CCR2 - Endothelial	Endothelial - CCL7	CCR2 - Endothelial	human
Endothelial	Endothelial	CCL7	CCR3	CCL7 - CCR3	CC	0.0097542	NA	-0.0098419	NA	0.00534224	NA	NA	NA	Endothelial - Endothelial	Endothelial - CCL7 - CCR3 - Endothelial	Endothelial - CCL7	CCR3 - Endothelial	human
Endothelial	Endothelial	CCL7	CCR5	CCL7 - CCR5	CC	0.0097542	NA	-0.0098419	NA	0.00534224	NA	NA	NA	Endothelial - Endothelial	Endothelial - CCL7 - CCR5 - Endothelial	Endothelial - CCL7	CCR5 - Endothelial	human
Endothelial	Endothelial	CCL7	CXCR3	CCL7 - CXCR3	CC	0.0097542	0	-0.0098419	-0.0523466	0.00534224	0	0	-0.0310942	Endothelial - Endothelial	Endothelial - CCL7 - CXCR3 - Endothelial	Endothelial - CCL7	CXCR3 - Endothelial	human
Endothelial	Endothelial	CCL7	DARC	CCL7 - DARC	CC	0.0097542	NA	-0.0098419	NA	0.00534224	NA	NA	NA	Endothelial - Endothelial	Endothelial - CCL7 - DARC - Endothelial	Endothelial - CCL7	DARC - Endothelial	human
Endothelial	Endothelial	CCL8	ACKR2	CCL8 - ACKR2	CC	0.00138442	0.000764392	-0.0183455	-0.0301821	0.000500835	0.00033389	1.05824e-06	-0.0242638	Endothelial - Endothelial	Endothelial - CCL8 - ACKR2 - Endothelial	Endothelial - CCL8	ACKR2 - Endothelial	human
Endothelial	Endothelial	CCL8	ACKR4	CCL8 - ACKR4	CC	0.00138442	0.17573	-0.0183455	0.159432	0.000500835	0.0714524	0.000243284	0.0705434	Endothelial - Endothelial	Endothelial - CCL8 - ACKR4 - Endothelial	Endothelial - CCL8	ACKR4 - Endothelial	human
Endothelial	Endothelial	CCL8	CCR1	CCL8 - CCR1	CC	0.00138442	0	-0.0183455	-0.041607	0.000500835	0	0	-0.0299763	Endothelial - Endothelial	Endothelial - CCL8 - CCR1 - Endothelial	Endothelial - CCL8	CCR1 - Endothelial	human
Endothelial	Endothelial	CCL8	CCR2	CCL8 - CCR2	CC	0.00138442	NA	-0.0183455	NA	0.000500835	NA	NA	NA	Endothelial - Endothelial	Endothelial - CCL8 - CCR2 - Endothelial	Endothelial - CCL8	CCR2 - Endothelial	human
Endothelial	Endothelial	CCL8	CCR3	CCL8 - CCR3	CC	0.00138442	NA	-0.0183455	NA	0.000500835	NA	NA	NA	Endothelial - Endothelial	Endothelial - CCL8 - CCR3 - Endothelial	Endothelial - CCL8	CCR3 - Endothelial	human
Endothelial	Endothelial	CCL8	CCR5	CCL8 - CCR5	CC	0.00138442	NA	-0.0183455	NA	0.000500835	NA	NA	NA	Endothelial - Endothelial	Endothelial - CCL8 - CCR5 - Endothelial	Endothelial - CCL8	CCR5 - Endothelial	human
Endothelial	Endothelial	CCL8	DARC	CCL8 - DARC	CC	0.00138442	NA	-0.0183455	NA	0.000500835	NA	NA	NA	Endothelial - Endothelial	Endothelial - CCL8 - DARC - Endothelial	Endothelial - CCL8	DARC - Endothelial	human
Endothelial	Endothelial	CD14	ITGA4	CD14 - ITGA4	UNCAT	0.00692571	0.0256639	-0.0431675	-0.205822	0.00267112	0.00784641	0.000177741	-0.124495	Endothelial - Endothelial	Endothelial - CD14 - ITGA4 - Endothelial	Endothelial - CD14	ITGA4 - Endothelial	human
Endothelial	Endothelial	CD14	ITGB1	CD14 - ITGB1	UNCAT	0.00692571	2.24898	-0.0431675	0.131115	0.00267112	0.894825	0.0155758	0.0439737	Endothelial - Endothelial	Endothelial - CD14 - ITGB1 - Endothelial	Endothelial - CD14	ITGB1 - Endothelial	human
Endothelial	Endothelial	CD24	SELP	CD24 - SELP	Cell-cell adhesion	0.0579535	0.0533047	-0.264137	0.0729201	0.0188648	0.0250417	0.0030892	-0.0956082	Endothelial - Endothelial	Endothelial - CD24 - SELP - Endothelial	Endothelial - CD24	SELP - Endothelial	human
Endothelial	Endothelial	CD34	SELL	CD34 - SELL	Cell-cell adhesion	1.76885	0.0250705	0.612838	0.0113233	0.716027	0.0128548	0.0443461	0.312081	Endothelial - Endothelial	Endothelial - CD34 - SELL - Endothelial	Endothelial - CD34	SELL - Endothelial	human
Endothelial	Endothelial	CD34	SELP	CD34 - SELP	Cell-cell adhesion	1.76885	0.0533047	0.612838	0.0729201	0.716027	0.0250417	0.0942883	0.342879	Endothelial - Endothelial	Endothelial - CD34 - SELP - Endothelial	Endothelial - CD34	SELP - Endothelial	human
Endothelial	Endothelial	CD40LG	CD40	CD40LG - CD40	UNCAT	NA	0.244661	NA	0.0978256	NA	0.120367	NA	NA	Endothelial - Endothelial	Endothelial - CD40LG - CD40 - Endothelial	Endothelial - CD40LG	CD40 - Endothelial	human
Endothelial	Endothelial	CD40LG	ITGAM	CD40LG - ITGAM	UNCAT	NA	0.000220423	NA	-0.0131065	NA	0.000166945	NA	NA	Endothelial - Endothelial	Endothelial - CD40LG - ITGAM - Endothelial	Endothelial - CD40LG	ITGAM - Endothelial	human
Endothelial	Endothelial	CD40LG	ITGB2	CD40LG - ITGB2	UNCAT	NA	0.0111766	NA	-0.176937	NA	0.00417362	NA	NA	Endothelial - Endothelial	Endothelial - CD40LG - ITGB2 - Endothelial	Endothelial - CD40LG	ITGB2 - Endothelial	human
Endothelial	Endothelial	CD40LG	TRAF3	CD40LG - TRAF3	UNCAT	NA	0.100508	NA	-0.0349336	NA	0.0554257	NA	NA	Endothelial - Endothelial	Endothelial - CD40LG - TRAF3 - Endothelial	Endothelial - CD40LG	TRAF3 - Endothelial	human
Endothelial	Endothelial	CD55	CD97	CD55 - CD97	UNCAT	0.578289	NA	-0.142394	NA	0.289649	NA	NA	NA	Endothelial - Endothelial	Endothelial - CD55 - CD97 - Endothelial	Endothelial - CD55	CD97 - Endothelial	human
Endothelial	Endothelial	CD55	CR1	CD55 - CR1	UNCAT	0.578289	0.00053528	-0.142394	-0.00740047	0.289649	0.000166945	0.000309546	-0.0748971	Endothelial - Endothelial	Endothelial - CD55 - CR1 - Endothelial	Endothelial - CD55	CR1 - Endothelial	human
Endothelial	Endothelial	CD55	EMR2	CD55 - EMR2	UNCAT	0.578289	NA	-0.142394	NA	0.289649	NA	NA	NA	Endothelial - Endothelial	Endothelial - CD55 - EMR2 - Endothelial	Endothelial - CD55	EMR2 - Endothelial	human
Endothelial	Endothelial	CD5L	CD5	CD5L - CD5	UNCAT	NA	NA	NA	NA	NA	NA	NA	NA	Endothelial - Endothelial	Endothelial - CD5L - CD5 - Endothelial	Endothelial - CD5L	CD5 - Endothelial	human
Endothelial	Endothelial	CD70	CD27	CD70 - CD27	UNCAT	0	0.000667824	-0.0165597	-0.0100776	0	0.000166945	0	-0.0133187	Endothelial - Endothelial	Endothelial - CD70 - CD27 - Endothelial	Endothelial - CD70	CD27 - Endothelial	human
Endothelial	Endothelial	CDH1	CDH2	CDH1 - CDH2	Cell-cell adhesion	0.0530731	0.156731	-0.351159	0.0599287	0.0208681	0.090818	0.00831819	-0.145615	Endothelial - Endothelial	Endothelial - CDH1 - CDH2 - Endothelial	Endothelial - CDH1	CDH2 - Endothelial	human
Endothelial	Endothelial	CDH1	EGFR	CDH1 - EGFR	EGF	0.0530731	0.0549946	-0.351159	-0.344129	0.0208681	0.0245409	0.00291873	-0.347644	Endothelial - Endothelial	Endothelial - CDH1 - EGFR - Endothelial	Endothelial - CDH1	EGFR - Endothelial	human
Endothelial	Endothelial	CDH1	ERBB3	CDH1 - ERBB3	Cell-cell adhesion	0.0530731	0.0206479	-0.351159	-0.298583	0.0208681	0.00901503	0.00109585	-0.324871	Endothelial - Endothelial	Endothelial - CDH1 - ERBB3 - Endothelial	Endothelial - CDH1	ERBB3 - Endothelial	human
Endothelial	Endothelial	CDH1	IGF1R	CDH1 - IGF1R	Cell-cell adhesion	0.0530731	0.288791	-0.351159	0.105434	0.0208681	0.15192	0.015327	-0.122863	Endothelial - Endothelial	Endothelial - CDH1 - IGF1R - Endothelial	Endothelial - CDH1	IGF1R - Endothelial	human
Endothelial	Endothelial	CDH1	ITGAE	CDH1 - ITGAE	Cell-cell adhesion	0.0530731	0.633436	-0.351159	-0.0320568	0.0208681	0.336394	0.0336184	-0.191608	Endothelial - Endothelial	Endothelial - CDH1 - ITGAE - Endothelial	Endothelial - CDH1	ITGAE - Endothelial	human
Endothelial	Endothelial	CDH1	ITGB7	CDH1 - ITGB7	Cell-cell adhesion	0.0530731	0.000147676	-0.351159	-0.028311	0.0208681	0.000166945	7.8376e-06	-0.189735	Endothelial - Endothelial	Endothelial - CDH1 - ITGB7 - Endothelial	Endothelial - CDH1	ITGB7 - Endothelial	human
Endothelial	Endothelial	CDH1	KLRG1	CDH1 - KLRG1	Cell-cell adhesion	0.0530731	0.272579	-0.351159	0.220025	0.0208681	0.134057	0.0144666	-0.0655668	Endothelial - Endothelial	Endothelial - CDH1 - KLRG1 - Endothelial	Endothelial - CDH1	KLRG1 - Endothelial	human
Endothelial	Endothelial	CDH1	LRP5	CDH1 - LRP5	Cell-cell adhesion	0.0530731	0.159593	-0.351159	0.0255498	0.0208681	0.0803005	0.00847007	-0.162805	Endothelial - Endothelial	Endothelial - CDH1 - LRP5 - Endothelial	Endothelial - CDH1	LRP5 - Endothelial	human
Endothelial	Endothelial	CDH1	PTPRF	CDH1 - PTPRF	Cell-cell adhesion	0.0530731	0.199618	-0.351159	-0.0973673	0.0208681	0.110184	0.0105943	-0.224263	Endothelial - Endothelial	Endothelial - CDH1 - PTPRF - Endothelial	Endothelial - CDH1	PTPRF - Endothelial	human
Endothelial	Endothelial	CDH1	PTPRM	CDH1 - PTPRM	Cell-cell adhesion	0.0530731	0.580885	-0.351159	0.290357	0.0208681	0.286811	0.0308294	-0.0304008	Endothelial - Endothelial	Endothelial - CDH1 - PTPRM - Endothelial	Endothelial - CDH1	PTPRM - Endothelial	human
Endothelial	Endothelial	CELA3B	CHRM3	CELA3B - CHRM3	UNCAT	0	NA	0	NA	0	NA	NA	NA	Endothelial - Endothelial	Endothelial - CELA3B - CHRM3 - Endothelial	Endothelial - CELA3B	CHRM3 - Endothelial	human
Endothelial	Endothelial	CEL	CXCR4	CEL - CXCR4	UNCAT	0.00313162	1.21491	-0.0168658	0.444743	0.00116861	0.45576	0.00380463	0.213939	Endothelial - Endothelial	Endothelial - CEL - CXCR4 - Endothelial	Endothelial - CEL	CXCR4 - Endothelial	human
Endothelial	Endothelial	CFH	ITGAM	CFH - ITGAM	Complement	0.57834	0.000220423	0.0897683	-0.0131065	0.26611	0.000166945	0.00012748	0.0383309	Endothelial - Endothelial	Endothelial - CFH - ITGAM - Endothelial	Endothelial - CFH	ITGAM - Endothelial	human
Endothelial	Endothelial	CFH	SELL	CFH - SELL	Complement	0.57834	0.0250705	0.0897683	0.0113233	0.26611	0.0128548	0.0144993	0.0505458	Endothelial - Endothelial	Endothelial - CFH - SELL - Endothelial	Endothelial - CFH	SELL - Endothelial	human
Endothelial	Endothelial	CGA	FSHR	CGA - FSHR	UNCAT	0.00163429	NA	-0.0180215	NA	0.00100167	NA	NA	NA	Endothelial - Endothelial	Endothelial - CGA - FSHR - Endothelial	Endothelial - CGA	FSHR - Endothelial	human
Endothelial	Endothelial	CGA	LHCGR	CGA - LHCGR	UNCAT	0.00163429	0	-0.0180215	0	0.00100167	0	0	-0.00901075	Endothelial - Endothelial	Endothelial - CGA - LHCGR - Endothelial	Endothelial - CGA	LHCGR - Endothelial	human
Endothelial	Endothelial	CGA	SIRPA	CGA - SIRPA	UNCAT	0.00163429	0.154935	-0.0180215	0.101051	0.00100167	0.0772955	0.000253209	0.0415146	Endothelial - Endothelial	Endothelial - CGA - SIRPA - Endothelial	Endothelial - CGA	SIRPA - Endothelial	human
Endothelial	Endothelial	CGA	TSHR	CGA - TSHR	UNCAT	0.00163429	0	-0.0180215	-0.0118532	0.00100167	0	0	-0.0149374	Endothelial - Endothelial	Endothelial - CGA - TSHR - Endothelial	Endothelial - CGA	TSHR - Endothelial	human
Endothelial	Endothelial	CGB8	SIRPA	CGB8 - SIRPA	UNCAT	NA	0.154935	NA	0.101051	NA	0.0772955	NA	NA	Endothelial - Endothelial	Endothelial - CGB8 - SIRPA - Endothelial	Endothelial - CGB8	SIRPA - Endothelial	human
Endothelial	Endothelial	CGB	LHCGR	CGB - LHCGR	UNCAT	NA	0	NA	0	NA	0	NA	NA	Endothelial - Endothelial	Endothelial - CGB - LHCGR - Endothelial	Endothelial - CGB	LHCGR - Endothelial	human
Endothelial	Endothelial	CGN	F11R	CGN - F11R	UNCAT	0.0107886	0.548178	-0.21828	0.111019	0.00367279	0.285142	0.00591406	-0.0536304	Endothelial - Endothelial	Endothelial - CGN - F11R - Endothelial	Endothelial - CGN	F11R - Endothelial	human
Endothelial	Endothelial	CGN	OCLN	CGN - OCLN	UNCAT	0.0107886	0.0413199	-0.21828	-0.152587	0.00367279	0.0190317	0.000445783	-0.185433	Endothelial - Endothelial	Endothelial - CGN - OCLN - Endothelial	Endothelial - CGN	OCLN - Endothelial	human
Endothelial	Endothelial	CGN	TGFBR1	CGN - TGFBR1	UNCAT	0.0107886	0.0788557	-0.21828	-0.0549375	0.00367279	0.0392321	0.000850741	-0.136609	Endothelial - Endothelial	Endothelial - CGN - TGFBR1 - Endothelial	Endothelial - CGN	TGFBR1 - Endothelial	human
Endothelial	Endothelial	CGN	TGFBR2	CGN - TGFBR2	UNCAT	0.0107886	1.62741	-0.21828	0.528438	0.00367279	0.733389	0.0175575	0.155079	Endothelial - Endothelial	Endothelial - CGN - TGFBR2 - Endothelial	Endothelial - CGN	TGFBR2 - Endothelial	human
Endothelial	Endothelial	CHAD	ITGA2	CHAD - ITGA2	Matrix (assorted)	NA	0.759539	NA	0.0792726	NA	0.376294	NA	NA	Endothelial - Endothelial	Endothelial - CHAD - ITGA2 - Endothelial	Endothelial - CHAD	ITGA2 - Endothelial	human
Endothelial	Endothelial	CHAD	ITGB1	CHAD - ITGB1	Matrix (assorted)	NA	2.24898	NA	0.131115	NA	0.894825	NA	NA	Endothelial - Endothelial	Endothelial - CHAD - ITGB1 - Endothelial	Endothelial - CHAD	ITGB1 - Endothelial	human
Endothelial	Endothelial	CLCF1	CNTFR	CLCF1 - CNTFR	UNCAT	0.0253829	NA	-0.10558	NA	0.0115192	NA	NA	NA	Endothelial - Endothelial	Endothelial - CLCF1 - CNTFR - Endothelial	Endothelial - CLCF1	CNTFR - Endothelial	human
Endothelial	Endothelial	CLCF1	CRLF1	CLCF1 - CRLF1	UNCAT	0.0253829	0.011959	-0.10558	-0.0496522	0.0115192	0.00267112	0.000303553	-0.0776163	Endothelial - Endothelial	Endothelial - CLCF1 - CRLF1 - Endothelial	Endothelial - CLCF1	CRLF1 - Endothelial	human
Endothelial	Endothelial	CLCF1	IL6ST	CLCF1 - IL6ST	UNCAT	0.0253829	1.54667	-0.10558	0.418353	0.0115192	0.701169	0.039259	0.156386	Endothelial - Endothelial	Endothelial - CLCF1 - IL6ST - Endothelial	Endothelial - CLCF1	IL6ST - Endothelial	human
Endothelial	Endothelial	CLCF1	LIFR	CLCF1 - LIFR	UNCAT	0.0253829	0.174125	-0.10558	0.0165547	0.0115192	0.0891486	0.00441978	-0.0445128	Endothelial - Endothelial	Endothelial - CLCF1 - LIFR - Endothelial	Endothelial - CLCF1	LIFR - Endothelial	human
Endothelial	Endothelial	CLEC11A	KIT	CLEC11A - KIT	KIT	0.437376	0.530196	-0.0879099	0.298215	0.23005	0.230217	0.231895	0.105152	Endothelial - Endothelial	Endothelial - CLEC11A - KIT - Endothelial	Endothelial - CLEC11A	KIT - Endothelial	human
Endothelial	Endothelial	CLEC3A	CLEC10A	CLEC3A - CLEC10A	Complement	0	0.00386855	-0.00907144	-0.00806038	0	0.0015025	0	-0.00856591	Endothelial - Endothelial	Endothelial - CLEC3A - CLEC10A - Endothelial	Endothelial - CLEC3A	CLEC10A - Endothelial	human
Endothelial	Endothelial	CLEC3A	CLEC2B	CLEC3A - CLEC2B	Complement	0	1.0333	-0.00907144	0.425965	0	0.46778	0	0.208447	Endothelial - Endothelial	Endothelial - CLEC3A - CLEC2B - Endothelial	Endothelial - CLEC3A	CLEC2B - Endothelial	human
Endothelial	Endothelial	CNTF	CNTFR	CNTF - CNTFR	UNCAT	0.000203645	NA	-0.0206831	NA	0.000166945	NA	NA	NA	Endothelial - Endothelial	Endothelial - CNTF - CNTFR - Endothelial	Endothelial - CNTF	CNTFR - Endothelial	human
Endothelial	Endothelial	CNTF	IL6R	CNTF - IL6R	UNCAT	0.000203645	0.0402667	-0.0206831	-0.0901196	0.000166945	0.0218698	8.20012e-06	-0.0554014	Endothelial - Endothelial	Endothelial - CNTF - IL6R - Endothelial	Endothelial - CNTF	IL6R - Endothelial	human
Endothelial	Endothelial	CNTF	IL6ST	CNTF - IL6ST	UNCAT	0.000203645	1.54667	-0.0206831	0.418353	0.000166945	0.701169	0.000314973	0.198835	Endothelial - Endothelial	Endothelial - CNTF - IL6ST - Endothelial	Endothelial - CNTF	IL6ST - Endothelial	human
Endothelial	Endothelial	CNTF	LIFR	CNTF - LIFR	UNCAT	0.000203645	0.174125	-0.0206831	0.0165547	0.000166945	0.0891486	3.54596e-05	-0.00206422	Endothelial - Endothelial	Endothelial - CNTF - LIFR - Endothelial	Endothelial - CNTF	LIFR - Endothelial	human
Endothelial	Endothelial	CNTN2	CNTN1	CNTN2 - CNTN1	Laminins	0.000649843	0	-0.0203864	0	0.00033389	0	0	-0.0101932	Endothelial - Endothelial	Endothelial - CNTN2 - CNTN1 - Endothelial	Endothelial - CNTN2	CNTN1 - Endothelial	human
Endothelial	Endothelial	CNTN2	CNTNAP2	CNTN2 - CNTNAP2	Laminins	0.000649843	0	-0.0203864	-0.036747	0.00033389	0	0	-0.0285667	Endothelial - Endothelial	Endothelial - CNTN2 - CNTNAP2 - Endothelial	Endothelial - CNTN2	CNTNAP2 - Endothelial	human
Endothelial	Endothelial	CNTN2	NRCAM	CNTN2 - NRCAM	Laminins	0.000649843	0.169478	-0.0203864	0.100995	0.00033389	0.0944908	0.000110134	0.0403042	Endothelial - Endothelial	Endothelial - CNTN2 - NRCAM - Endothelial	Endothelial - CNTN2	NRCAM - Endothelial	human
Endothelial	Endothelial	CNTN2	NRP1	CNTN2 - NRP1	Laminins	0.000649843	1.11122	-0.0203864	0.265715	0.00033389	0.539566	0.000722118	0.122665	Endothelial - Endothelial	Endothelial - CNTN2 - NRP1 - Endothelial	Endothelial - CNTN2	NRP1 - Endothelial	human
Endothelial	Endothelial	CNTN4	PTPRG	CNTN4 - PTPRG	Laminins	NA	0.187965	NA	-0.0299288	NA	0.0949917	NA	NA	Endothelial - Endothelial	Endothelial - CNTN4 - PTPRG - Endothelial	Endothelial - CNTN4	PTPRG - Endothelial	human
Endothelial	Endothelial	COL11A1	DDR1	COL11A1 - DDR1	Collagens	0.000651672	0.04846	-0.0313423	-0.170533	0.000500835	0.0228715	3.158e-05	-0.100938	Endothelial - Endothelial	Endothelial - COL11A1 - DDR1 - Endothelial	Endothelial - COL11A1	DDR1 - Endothelial	human
Endothelial	Endothelial	COL11A1	ITGA2	COL11A1 - ITGA2	Collagens	0.000651672	0.759539	-0.0313423	0.0792726	0.000500835	0.376294	0.000494971	0.0239652	Endothelial - Endothelial	Endothelial - COL11A1 - ITGA2 - Endothelial	Endothelial - COL11A1	ITGA2 - Endothelial	human
Endothelial	Endothelial	COL11A1	ITGB1	COL11A1 - ITGB1	Collagens	0.000651672	2.24898	-0.0313423	0.131115	0.000500835	0.894825	0.0014656	0.0498863	Endothelial - Endothelial	Endothelial - COL11A1 - ITGB1 - Endothelial	Endothelial - COL11A1	ITGB1 - Endothelial	human
Endothelial	Endothelial	COL14A1	CD44	COL14A1 - CD44	Collagens	0	0.205523	-0.0262241	-0.300826	0	0.100167	0	-0.163525	Endothelial - Endothelial	Endothelial - COL14A1 - CD44 - Endothelial	Endothelial - COL14A1	CD44 - Endothelial	human
Endothelial	Endothelial	COL18A1	GPC1	COL18A1 - GPC1	Collagens	1.24517	0.0567324	0.364054	-0.215047	0.60601	0.0262104	0.0706412	0.0745032	Endothelial - Endothelial	Endothelial - COL18A1 - GPC1 - Endothelial	Endothelial - COL18A1	GPC1 - Endothelial	human
Endothelial	Endothelial	COL18A1	GPC4	COL18A1 - GPC4	Collagens	1.24517	0.0055093	0.364054	-0.14621	0.60601	0.00166945	0.00685998	0.108922	Endothelial - Endothelial	Endothelial - COL18A1 - GPC4 - Endothelial	Endothelial - COL18A1	GPC4 - Endothelial	human
Endothelial	Endothelial	COL18A1	ITGA5	COL18A1 - ITGA5	Collagens	1.24517	1.13311	0.364054	0.244101	0.60601	0.556928	1.4109	0.304077	Endothelial - Endothelial	Endothelial - COL18A1 - ITGA5 - Endothelial	Endothelial - COL18A1	ITGA5 - Endothelial	human
Endothelial	Endothelial	COL18A1	ITGB1	COL18A1 - ITGB1	Collagens	1.24517	2.24898	0.364054	0.131115	0.60601	0.894825	2.80036	0.247584	Endothelial - Endothelial	Endothelial - COL18A1 - ITGB1 - Endothelial	Endothelial - COL18A1	ITGB1 - Endothelial	human
Endothelial	Endothelial	COL18A1	KDR	COL18A1 - KDR	Collagens	1.24517	1.25924	0.364054	0.499977	0.60601	0.577629	1.56797	0.432015	Endothelial - Endothelial	Endothelial - COL18A1 - KDR - Endothelial	Endothelial - COL18A1	KDR - Endothelial	human
Endothelial	Endothelial	COL1A1	CD36	COL1A1 - CD36	Collagens	1.09731	0.032635	-0.448972	0.0120882	0.414357	0.0155259	0.0358108	-0.218442	Endothelial - Endothelial	Endothelial - COL1A1 - CD36 - Endothelial	Endothelial - COL1A1	CD36 - Endothelial	human
Endothelial	Endothelial	COL1A1	CD44	COL1A1 - CD44	Collagens	1.09731	0.205523	-0.448972	-0.300826	0.414357	0.100167	0.225523	-0.374899	Endothelial - Endothelial	Endothelial - COL1A1 - CD44 - Endothelial	Endothelial - COL1A1	CD44 - Endothelial	human
Endothelial	Endothelial	COL1A1	CD93	COL1A1 - CD93	Collagens	1.09731	1.85847	-0.448972	0.66672	0.414357	0.782638	2.03932	0.108874	Endothelial - Endothelial	Endothelial - COL1A1 - CD93 - Endothelial	Endothelial - COL1A1	CD93 - Endothelial	human
Endothelial	Endothelial	COL1A1	DDR1	COL1A1 - DDR1	Collagens	1.09731	0.04846	-0.448972	-0.170533	0.414357	0.0228715	0.0531757	-0.309753	Endothelial - Endothelial	Endothelial - COL1A1 - DDR1 - Endothelial	Endothelial - COL1A1	DDR1 - Endothelial	human
Endothelial	Endothelial	COL1A1	DDR2	COL1A1 - DDR2	Collagens	1.09731	0.50577	-0.448972	-0.0582848	0.414357	0.221369	0.554987	-0.253629	Endothelial - Endothelial	Endothelial - COL1A1 - DDR2 - Endothelial	Endothelial - COL1A1	DDR2 - Endothelial	human
Endothelial	Endothelial	COL1A1	FLT4	COL1A1 - FLT4	Collagens	1.09731	0.166999	-0.448972	0.15496	0.414357	0.0684474	0.18325	-0.147006	Endothelial - Endothelial	Endothelial - COL1A1 - FLT4 - Endothelial	Endothelial - COL1A1	FLT4 - Endothelial	human
Endothelial	Endothelial	COL1A1	ITGA1	COL1A1 - ITGA1	Collagens	1.09731	0.309819	-0.448972	-0.0955117	0.414357	0.134224	0.339968	-0.272242	Endothelial - Endothelial	Endothelial - COL1A1 - ITGA1 - Endothelial	Endothelial - COL1A1	ITGA1 - Endothelial	human
Endothelial	Endothelial	COL1A1	ITGA11	COL1A1 - ITGA11	Collagens	1.09731	0.0942397	-0.448972	0.0358267	0.414357	0.0373957	0.10341	-0.206573	Endothelial - Endothelial	Endothelial - COL1A1 - ITGA11 - Endothelial	Endothelial - COL1A1	ITGA11 - Endothelial	human
Endothelial	Endothelial	COL1A1	ITGA2	COL1A1 - ITGA2	Collagens	1.09731	0.759539	-0.448972	0.0792726	0.414357	0.376294	0.833451	-0.18485	Endothelial - Endothelial	Endothelial - COL1A1 - ITGA2 - Endothelial	Endothelial - COL1A1	ITGA2 - Endothelial	human
Endothelial	Endothelial	COL1A1	ITGA5	COL1A1 - ITGA5	Collagens	1.09731	1.13311	-0.448972	0.244101	0.414357	0.556928	1.24337	-0.102436	Endothelial - Endothelial	Endothelial - COL1A1 - ITGA5 - Endothelial	Endothelial - COL1A1	ITGA5 - Endothelial	human
Endothelial	Endothelial	COL1A1	ITGAV	COL1A1 - ITGAV	Collagens	1.09731	0.857661	-0.448972	0.117173	0.414357	0.425543	0.941122	-0.1659	Endothelial - Endothelial	Endothelial - COL1A1 - ITGAV - Endothelial	Endothelial - COL1A1	ITGAV - Endothelial	human
Endothelial	Endothelial	COL1A1	ITGB1	COL1A1 - ITGB1	Collagens	1.09731	2.24898	-0.448972	0.131115	0.414357	0.894825	2.46784	-0.158929	Endothelial - Endothelial	Endothelial - COL1A1 - ITGB1 - Endothelial	Endothelial - COL1A1	ITGB1 - Endothelial	human
Endothelial	Endothelial	COL1A1	TMPRSS6	COL1A1 - TMPRSS6	Collagens	1.09731	0	-0.448972	-0.0100779	0.414357	0	0	-0.229525	Endothelial - Endothelial	Endothelial - COL1A1 - TMPRSS6 - Endothelial	Endothelial - COL1A1	TMPRSS6 - Endothelial	human
Endothelial	Endothelial	COL1A2	CD36	COL1A2 - CD36	Collagens	1.13587	0.032635	-0.37195	0.0120882	0.46828	0.0155259	0.037069	-0.179931	Endothelial - Endothelial	Endothelial - COL1A2 - CD36 - Endothelial	Endothelial - COL1A2	CD36 - Endothelial	human
Endothelial	Endothelial	COL1A2	CD44	COL1A2 - CD44	Collagens	1.13587	0.205523	-0.37195	-0.300826	0.46828	0.100167	0.233447	-0.336388	Endothelial - Endothelial	Endothelial - COL1A2 - CD44 - Endothelial	Endothelial - COL1A2	CD44 - Endothelial	human
Endothelial	Endothelial	COL1A2	CD93	COL1A2 - CD93	Collagens	1.13587	1.85847	-0.37195	0.66672	0.46828	0.782638	2.11097	0.147385	Endothelial - Endothelial	Endothelial - COL1A2 - CD93 - Endothelial	Endothelial - COL1A2	CD93 - Endothelial	human
Endothelial	Endothelial	COL1A2	FLT4	COL1A2 - FLT4	Collagens	1.13587	0.166999	-0.37195	0.15496	0.46828	0.0684474	0.189688	-0.108495	Endothelial - Endothelial	Endothelial - COL1A2 - FLT4 - Endothelial	Endothelial - COL1A2	FLT4 - Endothelial	human
Endothelial	Endothelial	COL1A2	ITGA1	COL1A2 - ITGA1	Collagens	1.13587	0.309819	-0.37195	-0.0955117	0.46828	0.134224	0.351913	-0.233731	Endothelial - Endothelial	Endothelial - COL1A2 - ITGA1 - Endothelial	Endothelial - COL1A2	ITGA1 - Endothelial	human
Endothelial	Endothelial	COL1A2	ITGA11	COL1A2 - ITGA11	Collagens	1.13587	0.0942397	-0.37195	0.0358267	0.46828	0.0373957	0.107044	-0.168062	Endothelial - Endothelial	Endothelial - COL1A2 - ITGA11 - Endothelial	Endothelial - COL1A2	ITGA11 - Endothelial	human
Endothelial	Endothelial	COL1A2	ITGA2	COL1A2 - ITGA2	Collagens	1.13587	0.759539	-0.37195	0.0792726	0.46828	0.376294	0.862734	-0.146339	Endothelial - Endothelial	Endothelial - COL1A2 - ITGA2 - Endothelial	Endothelial - COL1A2	ITGA2 - Endothelial	human
Endothelial	Endothelial	COL1A2	ITGA2B	COL1A2 - ITGA2B	Collagens	1.13587	0.00360779	-0.37195	-0.0143037	0.46828	0.00133556	0.00409797	-0.193127	Endothelial - Endothelial	Endothelial - COL1A2 - ITGA2B - Endothelial	Endothelial - COL1A2	ITGA2B - Endothelial	human
Endothelial	Endothelial	COL1A2	ITGAV	COL1A2 - ITGAV	Collagens	1.13587	0.857661	-0.37195	0.117173	0.46828	0.425543	0.974188	-0.127389	Endothelial - Endothelial	Endothelial - COL1A2 - ITGAV - Endothelial	Endothelial - COL1A2	ITGAV - Endothelial	human
Endothelial	Endothelial	COL1A2	ITGB1	COL1A2 - ITGB1	Collagens	1.13587	2.24898	-0.37195	0.131115	0.46828	0.894825	2.55454	-0.120418	Endothelial - Endothelial	Endothelial - COL1A2 - ITGB1 - Endothelial	Endothelial - COL1A2	ITGB1 - Endothelial	human
Endothelial	Endothelial	COL1A2	ITGB3	COL1A2 - ITGB3	Collagens	1.13587	0.0218954	-0.37195	-0.0518058	0.46828	0.0135225	0.0248702	-0.211878	Endothelial - Endothelial	Endothelial - COL1A2 - ITGB3 - Endothelial	Endothelial - COL1A2	ITGB3 - Endothelial	human
Endothelial	Endothelial	COL2A1	DDR1	COL2A1 - DDR1	Collagens	0	0.04846	0	-0.170533	0	0.0228715	0	-0.0852667	Endothelial - Endothelial	Endothelial - COL2A1 - DDR1 - Endothelial	Endothelial - COL2A1	DDR1 - Endothelial	human
Endothelial	Endothelial	COL2A1	ITGA1	COL2A1 - ITGA1	Collagens	0	0.309819	0	-0.0955117	0	0.134224	0	-0.0477559	Endothelial - Endothelial	Endothelial - COL2A1 - ITGA1 - Endothelial	Endothelial - COL2A1	ITGA1 - Endothelial	human
Endothelial	Endothelial	COL2A1	ITGA10	COL2A1 - ITGA10	Collagens	0	0.400283	0	0.17139	0	0.18197	0	0.0856951	Endothelial - Endothelial	Endothelial - COL2A1 - ITGA10 - Endothelial	Endothelial - COL2A1	ITGA10 - Endothelial	human
Endothelial	Endothelial	COL2A1	ITGA2	COL2A1 - ITGA2	Collagens	0	0.759539	0	0.0792726	0	0.376294	0	0.0396363	Endothelial - Endothelial	Endothelial - COL2A1 - ITGA2 - Endothelial	Endothelial - COL2A1	ITGA2 - Endothelial	human
Endothelial	Endothelial	COL2A1	ITGA2B	COL2A1 - ITGA2B	Collagens	0	0.00360779	0	-0.0143037	0	0.00133556	0	-0.00715184	Endothelial - Endothelial	Endothelial - COL2A1 - ITGA2B - Endothelial	Endothelial - COL2A1	ITGA2B - Endothelial	human
Endothelial	Endothelial	COL2A1	ITGB1	COL2A1 - ITGB1	Collagens	0	2.24898	0	0.131115	0	0.894825	0	0.0655574	Endothelial - Endothelial	Endothelial - COL2A1 - ITGB1 - Endothelial	Endothelial - COL2A1	ITGB1 - Endothelial	human
Endothelial	Endothelial	COL2A1	MAG	COL2A1 - MAG	Collagens	0	NA	0	NA	0	NA	NA	NA	Endothelial - Endothelial	Endothelial - COL2A1 - MAG - Endothelial	Endothelial - COL2A1	MAG - Endothelial	human
Endothelial	Endothelial	COL2A1	OR1E1	COL2A1 - OR1E1	Collagens	0	NA	0	NA	0	NA	NA	NA	Endothelial - Endothelial	Endothelial - COL2A1 - OR1E1 - Endothelial	Endothelial - COL2A1	OR1E1 - Endothelial	human
Endothelial	Endothelial	COL2A1	TNFRSF10A	COL2A1 - TNFRSF10A	Collagens	0	0.133386	0	0.00493011	0	0.0686144	0	0.00246505	Endothelial - Endothelial	Endothelial - COL2A1 - TNFRSF10A - Endothelial	Endothelial - COL2A1	TNFRSF10A - Endothelial	human
Endothelial	Endothelial	COL3A1	DDR1	COL3A1 - DDR1	Collagens	0.498309	0.04846	-0.32457	-0.170533	0.183139	0.0228715	0.024148	-0.247552	Endothelial - Endothelial	Endothelial - COL3A1 - DDR1 - Endothelial	Endothelial - COL3A1	DDR1 - Endothelial	human
Endothelial	Endothelial	COL3A1	DDR2	COL3A1 - DDR2	Collagens	0.498309	0.50577	-0.32457	-0.0582848	0.183139	0.221369	0.252029	-0.191427	Endothelial - Endothelial	Endothelial - COL3A1 - DDR2 - Endothelial	Endothelial - COL3A1	DDR2 - Endothelial	human
Endothelial	Endothelial	COL3A1	ITGA2	COL3A1 - ITGA2	Collagens	0.498309	0.759539	-0.32457	0.0792726	0.183139	0.376294	0.378485	-0.122649	Endothelial - Endothelial	Endothelial - COL3A1 - ITGA2 - Endothelial	Endothelial - COL3A1	ITGA2 - Endothelial	human
Endothelial	Endothelial	COL3A1	ITGB1	COL3A1 - ITGB1	Collagens	0.498309	2.24898	-0.32457	0.131115	0.183139	0.894825	1.12069	-0.0967274	Endothelial - Endothelial	Endothelial - COL3A1 - ITGB1 - Endothelial	Endothelial - COL3A1	ITGB1 - Endothelial	human
Endothelial	Endothelial	COL3A1	MAG	COL3A1 - MAG	Collagens	0.498309	NA	-0.32457	NA	0.183139	NA	NA	NA	Endothelial - Endothelial	Endothelial - COL3A1 - MAG - Endothelial	Endothelial - COL3A1	MAG - Endothelial	human
Endothelial	Endothelial	COL4A1	CD47	COL4A1 - CD47	Collagens	2.68091	0.492028	0.550686	-0.177159	0.901169	0.255092	1.31908	0.186763	Endothelial - Endothelial	Endothelial - COL4A1 - CD47 - Endothelial	Endothelial - COL4A1	CD47 - Endothelial	human
Endothelial	Endothelial	COL4A1	CD93	COL4A1 - CD93	Collagens	2.68091	1.85847	0.550686	0.66672	0.901169	0.782638	4.9824	0.608703	Endothelial - Endothelial	Endothelial - COL4A1 - CD93 - Endothelial	Endothelial - COL4A1	CD93 - Endothelial	human
Endothelial	Endothelial	COL4A1	ITGA1	COL4A1 - ITGA1	Collagens	2.68091	0.309819	0.550686	-0.0955117	0.901169	0.134224	0.830597	0.227587	Endothelial - Endothelial	Endothelial - COL4A1 - ITGA1 - Endothelial	Endothelial - COL4A1	ITGA1 - Endothelial	human
Endothelial	Endothelial	COL4A1	ITGA2	COL4A1 - ITGA2	Collagens	2.68091	0.759539	0.550686	0.0792726	0.901169	0.376294	2.03626	0.314979	Endothelial - Endothelial	Endothelial - COL4A1 - ITGA2 - Endothelial	Endothelial - COL4A1	ITGA2 - Endothelial	human
Endothelial	Endothelial	COL4A1	ITGAV	COL4A1 - ITGAV	Collagens	2.68091	0.857661	0.550686	0.117173	0.901169	0.425543	2.29931	0.333929	Endothelial - Endothelial	Endothelial - COL4A1 - ITGAV - Endothelial	Endothelial - COL4A1	ITGAV - Endothelial	human
Endothelial	Endothelial	COL4A1	ITGB1	COL4A1 - ITGB1	Collagens	2.68091	2.24898	0.550686	0.131115	0.901169	0.894825	6.02933	0.3409	Endothelial - Endothelial	Endothelial - COL4A1 - ITGB1 - Endothelial	Endothelial - COL4A1	ITGB1 - Endothelial	human
Endothelial	Endothelial	COL4A1	ITGB8	COL4A1 - ITGB8	Collagens	2.68091	0.0208951	0.550686	-0.0167671	0.901169	0.0135225	0.056018	0.266959	Endothelial - Endothelial	Endothelial - COL4A1 - ITGB8 - Endothelial	Endothelial - COL4A1	ITGB8 - Endothelial	human
Endothelial	Endothelial	COL4A2	CD93	COL4A2 - CD93	Collagens	1.99544	1.85847	0.449593	0.66672	0.808013	0.782638	3.70846	0.558157	Endothelial - Endothelial	Endothelial - COL4A2 - CD93 - Endothelial	Endothelial - COL4A2	CD93 - Endothelial	human
Endothelial	Endothelial	COL4A3	CD47	COL4A3 - CD47	Collagens	NA	0.492028	NA	-0.177159	NA	0.255092	NA	NA	Endothelial - Endothelial	Endothelial - COL4A3 - CD47 - Endothelial	Endothelial - COL4A3	CD47 - Endothelial	human
Endothelial	Endothelial	COL4A3	CD93	COL4A3 - CD93	Collagens	NA	1.85847	NA	0.66672	NA	0.782638	NA	NA	Endothelial - Endothelial	Endothelial - COL4A3 - CD93 - Endothelial	Endothelial - COL4A3	CD93 - Endothelial	human
Endothelial	Endothelial	COL4A3	ITGA1	COL4A3 - ITGA1	Collagens	NA	0.309819	NA	-0.0955117	NA	0.134224	NA	NA	Endothelial - Endothelial	Endothelial - COL4A3 - ITGA1 - Endothelial	Endothelial - COL4A3	ITGA1 - Endothelial	human
Endothelial	Endothelial	COL4A3	ITGA2	COL4A3 - ITGA2	Collagens	NA	0.759539	NA	0.0792726	NA	0.376294	NA	NA	Endothelial - Endothelial	Endothelial - COL4A3 - ITGA2 - Endothelial	Endothelial - COL4A3	ITGA2 - Endothelial	human
Endothelial	Endothelial	COL4A3	ITGAV	COL4A3 - ITGAV	Collagens	NA	0.857661	NA	0.117173	NA	0.425543	NA	NA	Endothelial - Endothelial	Endothelial - COL4A3 - ITGAV - Endothelial	Endothelial - COL4A3	ITGAV - Endothelial	human
Endothelial	Endothelial	COL4A3	ITGB1	COL4A3 - ITGB1	Collagens	NA	2.24898	NA	0.131115	NA	0.894825	NA	NA	Endothelial - Endothelial	Endothelial - COL4A3 - ITGB1 - Endothelial	Endothelial - COL4A3	ITGB1 - Endothelial	human
Endothelial	Endothelial	COL4A4	CD47	COL4A4 - CD47	Collagens	0.00219888	0.492028	-0.030165	-0.177159	0.000500835	0.255092	0.00108191	-0.103662	Endothelial - Endothelial	Endothelial - COL4A4 - CD47 - Endothelial	Endothelial - COL4A4	CD47 - Endothelial	human
Endothelial	Endothelial	COL4A4	CD93	COL4A4 - CD93	Collagens	0.00219888	1.85847	-0.030165	0.66672	0.000500835	0.782638	0.00408655	0.318278	Endothelial - Endothelial	Endothelial - COL4A4 - CD93 - Endothelial	Endothelial - COL4A4	CD93 - Endothelial	human
Endothelial	Endothelial	COL4A4	ITGA1	COL4A4 - ITGA1	Collagens	0.00219888	0.309819	-0.030165	-0.0955117	0.000500835	0.134224	0.000681254	-0.0628384	Endothelial - Endothelial	Endothelial - COL4A4 - ITGA1 - Endothelial	Endothelial - COL4A4	ITGA1 - Endothelial	human
Endothelial	Endothelial	COL4A4	ITGA2	COL4A4 - ITGA2	Collagens	0.00219888	0.759539	-0.030165	0.0792726	0.000500835	0.376294	0.00167013	0.0245538	Endothelial - Endothelial	Endothelial - COL4A4 - ITGA2 - Endothelial	Endothelial - COL4A4	ITGA2 - Endothelial	human
Endothelial	Endothelial	COL4A4	ITGAV	COL4A4 - ITGAV	Collagens	0.00219888	0.857661	-0.030165	0.117173	0.000500835	0.425543	0.00188589	0.0435038	Endothelial - Endothelial	Endothelial - COL4A4 - ITGAV - Endothelial	Endothelial - COL4A4	ITGAV - Endothelial	human
Endothelial	Endothelial	COL4A4	ITGB1	COL4A4 - ITGB1	Collagens	0.00219888	2.24898	-0.030165	0.131115	0.000500835	0.894825	0.00494524	0.0504749	Endothelial - Endothelial	Endothelial - COL4A4 - ITGB1 - Endothelial	Endothelial - COL4A4	ITGB1 - Endothelial	human
Endothelial	Endothelial	COL4A5	CD47	COL4A5 - CD47	Collagens	0.222344	0.492028	0.15849	-0.177159	0.110184	0.255092	0.109399	-0.00933417	Endothelial - Endothelial	Endothelial - COL4A5 - CD47 - Endothelial	Endothelial - COL4A5	CD47 - Endothelial	human
Endothelial	Endothelial	COL4A5	CD93	COL4A5 - CD93	Collagens	0.222344	1.85847	0.15849	0.66672	0.110184	0.782638	0.41322	0.412605	Endothelial - Endothelial	Endothelial - COL4A5 - CD93 - Endothelial	Endothelial - COL4A5	CD93 - Endothelial	human
Endothelial	Endothelial	COL4A5	ITGA1	COL4A5 - ITGA1	Collagens	0.222344	0.309819	0.15849	-0.0955117	0.110184	0.134224	0.0688863	0.0314893	Endothelial - Endothelial	Endothelial - COL4A5 - ITGA1 - Endothelial	Endothelial - COL4A5	ITGA1 - Endothelial	human
Endothelial	Endothelial	COL4A5	ITGA2	COL4A5 - ITGA2	Collagens	0.222344	0.759539	0.15849	0.0792726	0.110184	0.376294	0.168879	0.118882	Endothelial - Endothelial	Endothelial - COL4A5 - ITGA2 - Endothelial	Endothelial - COL4A5	ITGA2 - Endothelial	human
Endothelial	Endothelial	COL4A5	ITGAV	COL4A5 - ITGAV	Collagens	0.222344	0.857661	0.15849	0.117173	0.110184	0.425543	0.190696	0.137831	Endothelial - Endothelial	Endothelial - COL4A5 - ITGAV - Endothelial	Endothelial - COL4A5	ITGAV - Endothelial	human
Endothelial	Endothelial	COL4A5	ITGB1	COL4A5 - ITGB1	Collagens	0.222344	2.24898	0.15849	0.131115	0.110184	0.894825	0.500048	0.144803	Endothelial - Endothelial	Endothelial - COL4A5 - ITGB1 - Endothelial	Endothelial - COL4A5	ITGB1 - Endothelial	human
Endothelial	Endothelial	COL4A6	CD47	COL4A6 - CD47	Collagens	0.0396154	0.492028	0.0411843	-0.177159	0.0227045	0.255092	0.0194919	-0.0679872	Endothelial - Endothelial	Endothelial - COL4A6 - CD47 - Endothelial	Endothelial - COL4A6	CD47 - Endothelial	human
Endothelial	Endothelial	COL4A6	CD93	COL4A6 - CD93	Collagens	0.0396154	1.85847	0.0411843	0.66672	0.0227045	0.782638	0.0736241	0.353952	Endothelial - Endothelial	Endothelial - COL4A6 - CD93 - Endothelial	Endothelial - COL4A6	CD93 - Endothelial	human
Endothelial	Endothelial	COL4A6	ITGA1	COL4A6 - ITGA1	Collagens	0.0396154	0.309819	0.0411843	-0.0955117	0.0227045	0.134224	0.0122736	-0.0271637	Endothelial - Endothelial	Endothelial - COL4A6 - ITGA1 - Endothelial	Endothelial - COL4A6	ITGA1 - Endothelial	human
Endothelial	Endothelial	COL4A6	ITGA2	COL4A6 - ITGA2	Collagens	0.0396154	0.759539	0.0411843	0.0792726	0.0227045	0.376294	0.0300894	0.0602285	Endothelial - Endothelial	Endothelial - COL4A6 - ITGA2 - Endothelial	Endothelial - COL4A6	ITGA2 - Endothelial	human
Endothelial	Endothelial	COL4A6	ITGAV	COL4A6 - ITGAV	Collagens	0.0396154	0.857661	0.0411843	0.117173	0.0227045	0.425543	0.0339766	0.0791784	Endothelial - Endothelial	Endothelial - COL4A6 - ITGAV - Endothelial	Endothelial - COL4A6	ITGAV - Endothelial	human
Endothelial	Endothelial	COL4A6	ITGB1	COL4A6 - ITGB1	Collagens	0.0396154	2.24898	0.0411843	0.131115	0.0227045	0.894825	0.0890944	0.0861496	Endothelial - Endothelial	Endothelial - COL4A6 - ITGB1 - Endothelial	Endothelial - COL4A6	ITGB1 - Endothelial	human
Endothelial	Endothelial	COL5A1	ITGA1	COL5A1 - ITGA1	Collagens	0.434573	0.309819	-0.035517	-0.0955117	0.223706	0.134224	0.134639	-0.0655144	Endothelial - Endothelial	Endothelial - COL5A1 - ITGA1 - Endothelial	Endothelial - COL5A1	ITGA1 - Endothelial	human
Endothelial	Endothelial	COL5A1	ITGB1	COL5A1 - ITGB1	Collagens	0.434573	2.24898	-0.035517	0.131115	0.223706	0.894825	0.977347	0.0477989	Endothelial - Endothelial	Endothelial - COL5A1 - ITGB1 - Endothelial	Endothelial - COL5A1	ITGB1 - Endothelial	human
Endothelial	Endothelial	COL5A1	SDC3	COL5A1 - SDC3	Collagens	0.434573	0.0938629	-0.035517	0.0312627	0.223706	0.0504174	0.0407903	-0.00212711	Endothelial - Endothelial	Endothelial - COL5A1 - SDC3 - Endothelial	Endothelial - COL5A1	SDC3 - Endothelial	human
Endothelial	Endothelial	COL5A2	DDR1	COL5A2 - DDR1	Collagens	0.913744	0.04846	-0.0493034	-0.170533	0.455092	0.0228715	0.04428	-0.109918	Endothelial - Endothelial	Endothelial - COL5A2 - DDR1 - Endothelial	Endothelial - COL5A2	DDR1 - Endothelial	human
Endothelial	Endothelial	COL5A2	ITGA1	COL5A2 - ITGA1	Collagens	0.913744	0.309819	-0.0493034	-0.0955117	0.455092	0.134224	0.283095	-0.0724076	Endothelial - Endothelial	Endothelial - COL5A2 - ITGA1 - Endothelial	Endothelial - COL5A2	ITGA1 - Endothelial	human
Endothelial	Endothelial	COL5A2	ITGB1	COL5A2 - ITGB1	Collagens	0.913744	2.24898	-0.0493034	0.131115	0.455092	0.894825	2.05499	0.0409057	Endothelial - Endothelial	Endothelial - COL5A2 - ITGB1 - Endothelial	Endothelial - COL5A2	ITGB1 - Endothelial	human
Endothelial	Endothelial	COL5A3	SDC3	COL5A3 - SDC3	Collagens	0.0568092	0.0938629	-0.225584	0.0312627	0.0180301	0.0504174	0.00533227	-0.0971609	Endothelial - Endothelial	Endothelial - COL5A3 - SDC3 - Endothelial	Endothelial - COL5A3	SDC3 - Endothelial	human
Endothelial	Endothelial	COL6A1	ITGA1	COL6A1 - ITGA1	Collagens	0.375358	0.309819	-0.421695	-0.0955117	0.161603	0.134224	0.116293	-0.258603	Endothelial - Endothelial	Endothelial - COL6A1 - ITGA1 - Endothelial	Endothelial - COL6A1	ITGA1 - Endothelial	human
Endothelial	Endothelial	COL6A1	ITGA2	COL6A1 - ITGA2	Collagens	0.375358	0.759539	-0.421695	0.0792726	0.161603	0.376294	0.285099	-0.171211	Endothelial - Endothelial	Endothelial - COL6A1 - ITGA2 - Endothelial	Endothelial - COL6A1	ITGA2 - Endothelial	human
Endothelial	Endothelial	COL6A1	ITGA6	COL6A1 - ITGA6	Collagens	0.375358	1.31566	-0.421695	0.512845	0.161603	0.591653	0.493845	0.0455751	Endothelial - Endothelial	Endothelial - COL6A1 - ITGA6 - Endothelial	Endothelial - COL6A1	ITGA6 - Endothelial	human
Endothelial	Endothelial	COL6A1	ITGB1	COL6A1 - ITGB1	Collagens	0.375358	2.24898	-0.421695	0.131115	0.161603	0.894825	0.844174	-0.14529	Endothelial - Endothelial	Endothelial - COL6A1 - ITGB1 - Endothelial	Endothelial - COL6A1	ITGB1 - Endothelial	human
Endothelial	Endothelial	COL6A2	ITGA1	COL6A2 - ITGA1	Collagens	0.31615	0.309819	-0.468462	-0.0955117	0.11803	0.134224	0.0979492	-0.281987	Endothelial - Endothelial	Endothelial - COL6A2 - ITGA1 - Endothelial	Endothelial - COL6A2	ITGA1 - Endothelial	human
Endothelial	Endothelial	COL6A2	ITGA2	COL6A2 - ITGA2	Collagens	0.31615	0.759539	-0.468462	0.0792726	0.11803	0.376294	0.240128	-0.194595	Endothelial - Endothelial	Endothelial - COL6A2 - ITGA2 - Endothelial	Endothelial - COL6A2	ITGA2 - Endothelial	human
Endothelial	Endothelial	COL6A2	ITGB1	COL6A2 - ITGB1	Collagens	0.31615	2.24898	-0.468462	0.131115	0.11803	0.894825	0.711016	-0.168673	Endothelial - Endothelial	Endothelial - COL6A2 - ITGB1 - Endothelial	Endothelial - COL6A2	ITGB1 - Endothelial	human
Endothelial	Endothelial	COL6A3	ITGA1	COL6A3 - ITGA1	Collagens	0.460895	0.309819	-0.43571	-0.0955117	0.167279	0.134224	0.142794	-0.265611	Endothelial - Endothelial	Endothelial - COL6A3 - ITGA1 - Endothelial	Endothelial - COL6A3	ITGA1 - Endothelial	human
Endothelial	Endothelial	COL6A3	ITGA2	COL6A3 - ITGA2	Collagens	0.460895	0.759539	-0.43571	0.0792726	0.167279	0.376294	0.350067	-0.178219	Endothelial - Endothelial	Endothelial - COL6A3 - ITGA2 - Endothelial	Endothelial - COL6A3	ITGA2 - Endothelial	human
Endothelial	Endothelial	COL6A3	ITGB1	COL6A3 - ITGB1	Collagens	0.460895	2.24898	-0.43571	0.131115	0.167279	0.894825	1.03654	-0.152298	Endothelial - Endothelial	Endothelial - COL6A3 - ITGB1 - Endothelial	Endothelial - COL6A3	ITGB1 - Endothelial	human
Endothelial	Endothelial	COL7A1	ITGA2	COL7A1 - ITGA2	Collagens	0.119645	0.759539	-0.24397	0.0792726	0.0427379	0.376294	0.0908751	-0.0823486	Endothelial - Endothelial	Endothelial - COL7A1 - ITGA2 - Endothelial	Endothelial - COL7A1	ITGA2 - Endothelial	human
Endothelial	Endothelial	COL7A1	ITGB1	COL7A1 - ITGB1	Collagens	0.119645	2.24898	-0.24397	0.131115	0.0427379	0.894825	0.26908	-0.0564275	Endothelial - Endothelial	Endothelial - COL7A1 - ITGB1 - Endothelial	Endothelial - COL7A1	ITGB1 - Endothelial	human
Endothelial	Endothelial	COL8A1	ITGA1	COL8A1 - ITGA1	Collagens	0.58998	0.309819	-0.115508	-0.0955117	0.237896	0.134224	0.182787	-0.10551	Endothelial - Endothelial	Endothelial - COL8A1 - ITGA1 - Endothelial	Endothelial - COL8A1	ITGA1 - Endothelial	human
Endothelial	Endothelial	COL8A1	ITGA2	COL8A1 - ITGA2	Collagens	0.58998	0.759539	-0.115508	0.0792726	0.237896	0.376294	0.448113	-0.0181179	Endothelial - Endothelial	Endothelial - COL8A1 - ITGA2 - Endothelial	Endothelial - COL8A1	ITGA2 - Endothelial	human
Endothelial	Endothelial	COL9A1	MAG	COL9A1 - MAG	Collagens	NA	NA	NA	NA	NA	NA	NA	NA	Endothelial - Endothelial	Endothelial - COL9A1 - MAG - Endothelial	Endothelial - COL9A1	MAG - Endothelial	human
Endothelial	Endothelial	COL9A2	MAG	COL9A2 - MAG	Collagens	0.000803485	NA	-0.0232969	NA	0.00066778	NA	NA	NA	Endothelial - Endothelial	Endothelial - COL9A2 - MAG - Endothelial	Endothelial - COL9A2	MAG - Endothelial	human
Endothelial	Endothelial	COL9A3	MAG	COL9A3 - MAG	Collagens	0.0430661	NA	0.0502787	NA	0.0170284	NA	NA	NA	Endothelial - Endothelial	Endothelial - COL9A3 - MAG - Endothelial	Endothelial - COL9A3	MAG - Endothelial	human
Endothelial	Endothelial	COLQ	MUSK	COLQ - MUSK	Collagens	0.00434398	0.000345367	-0.0157617	-0.0129106	0.00200334	0.000166945	1.50027e-06	-0.0143361	Endothelial - Endothelial	Endothelial - COLQ - MUSK - Endothelial	Endothelial - COLQ	MUSK - Endothelial	human
Endothelial	Endothelial	CORT	GHSR	CORT - GHSR	UNCAT	0.00669814	NA	-0.0568799	NA	0.00534224	NA	NA	NA	Endothelial - Endothelial	Endothelial - CORT - GHSR - Endothelial	Endothelial - CORT	GHSR - Endothelial	human
Endothelial	Endothelial	CORT	MRGPRX2	CORT - MRGPRX2	UNCAT	0.00669814	NA	-0.0568799	NA	0.00534224	NA	NA	NA	Endothelial - Endothelial	Endothelial - CORT - MRGPRX2 - Endothelial	Endothelial - CORT	MRGPRX2 - Endothelial	human
Endothelial	Endothelial	CORT	SSTR1	CORT - SSTR1	UNCAT	0.00669814	0.00278247	-0.0568799	-0.0524462	0.00534224	0.00133556	1.86374e-05	-0.0546631	Endothelial - Endothelial	Endothelial - CORT - SSTR1 - Endothelial	Endothelial - CORT	SSTR1 - Endothelial	human
Endothelial	Endothelial	CORT	SSTR2	CORT - SSTR2	UNCAT	0.00669814	0.00203619	-0.0568799	-0.0310551	0.00534224	0.00100167	1.36387e-05	-0.0439675	Endothelial - Endothelial	Endothelial - CORT - SSTR2 - Endothelial	Endothelial - CORT	SSTR2 - Endothelial	human
Endothelial	Endothelial	CORT	SSTR3	CORT - SSTR3	UNCAT	0.00669814	0	-0.0568799	0	0.00534224	0	0	-0.02844	Endothelial - Endothelial	Endothelial - CORT - SSTR3 - Endothelial	Endothelial - CORT	SSTR3 - Endothelial	human
Endothelial	Endothelial	CORT	SSTR4	CORT - SSTR4	UNCAT	0.00669814	NA	-0.0568799	NA	0.00534224	NA	NA	NA	Endothelial - Endothelial	Endothelial - CORT - SSTR4 - Endothelial	Endothelial - CORT	SSTR4 - Endothelial	human
Endothelial	Endothelial	CORT	SSTR5	CORT - SSTR5	UNCAT	0.00669814	NA	-0.0568799	NA	0.00534224	NA	NA	NA	Endothelial - Endothelial	Endothelial - CORT - SSTR5 - Endothelial	Endothelial - CORT	SSTR5 - Endothelial	human
Endothelial	Endothelial	CPAMD8	SCTR	CPAMD8 - SCTR	UNCAT	0.0286716	NA	0.0320681	NA	0.0126878	NA	NA	NA	Endothelial - Endothelial	Endothelial - CPAMD8 - SCTR - Endothelial	Endothelial - CPAMD8	SCTR - Endothelial	human
Endothelial	Endothelial	CP	SLC40A1	CP - SLC40A1	UNCAT	0.0303782	0.257451	-0.17526	0.101807	0.00918197	0.133389	0.00782092	-0.0367265	Endothelial - Endothelial	Endothelial - CP - SLC40A1 - Endothelial	Endothelial - CP	SLC40A1 - Endothelial	human
Endothelial	Endothelial	CRH	CRHR1	CRH - CRHR1	UNCAT	0	NA	-0.0140574	NA	0	NA	NA	NA	Endothelial - Endothelial	Endothelial - CRH - CRHR1 - Endothelial	Endothelial - CRH	CRHR1 - Endothelial	human
Endothelial	Endothelial	CRH	CRHR2	CRH - CRHR2	UNCAT	0	NA	-0.0140574	NA	0	NA	NA	NA	Endothelial - Endothelial	Endothelial - CRH - CRHR2 - Endothelial	Endothelial - CRH	CRHR2 - Endothelial	human
Endothelial	Endothelial	CRH	MC2R	CRH - MC2R	UNCAT	0	NA	-0.0140574	NA	0	NA	NA	NA	Endothelial - Endothelial	Endothelial - CRH - MC2R - Endothelial	Endothelial - CRH	MC2R - Endothelial	human
Endothelial	Endothelial	CRP	OLR1	CRP - OLR1	UNCAT	0.000360041	0.00140691	-0.0164471	-0.0238142	0.000166945	0.000500835	5.06544e-07	-0.0201306	Endothelial - Endothelial	Endothelial - CRP - OLR1 - Endothelial	Endothelial - CRP	OLR1 - Endothelial	human
Endothelial	Endothelial	CSF1	CSF1R	CSF1 - CSF1R	CSF	0.0613749	0	0.0257623	-0.0516984	0.0315526	0	0	-0.012968	Endothelial - Endothelial	Endothelial - CSF1 - CSF1R - Endothelial	Endothelial - CSF1	CSF1R - Endothelial	human
Endothelial	Endothelial	CSF2	CSF1R	CSF2 - CSF1R	CSF	0.0104487	0	-0.0499693	-0.0516984	0.00400668	0	0	-0.0508339	Endothelial - Endothelial	Endothelial - CSF2 - CSF1R - Endothelial	Endothelial - CSF2	CSF1R - Endothelial	human
Endothelial	Endothelial	CSF2	CSF2RA	CSF2 - CSF2RA	CSF	0.0104487	0.00524113	-0.0499693	-0.0768539	0.00400668	0.00100167	5.47629e-05	-0.0634116	Endothelial - Endothelial	Endothelial - CSF2 - CSF2RA - Endothelial	Endothelial - CSF2	CSF2RA - Endothelial	human
Endothelial	Endothelial	CSF2	CSF2RB	CSF2 - CSF2RB	CSF	0.0104487	0.168944	-0.0499693	0.176394	0.00400668	0.0884808	0.00176525	0.0632125	Endothelial - Endothelial	Endothelial - CSF2 - CSF2RB - Endothelial	Endothelial - CSF2	CSF2RB - Endothelial	human
Endothelial	Endothelial	CSF2	CSF3R	CSF2 - CSF3R	CSF	0.0104487	NA	-0.0499693	NA	0.00400668	NA	NA	NA	Endothelial - Endothelial	Endothelial - CSF2 - CSF3R - Endothelial	Endothelial - CSF2	CSF3R - Endothelial	human
Endothelial	Endothelial	CSF2	IL3RA	CSF2 - IL3RA	CSF	0.0104487	0.267837	-0.0499693	0.219742	0.00400668	0.129716	0.00279855	0.0848863	Endothelial - Endothelial	Endothelial - CSF2 - IL3RA - Endothelial	Endothelial - CSF2	IL3RA - Endothelial	human
Endothelial	Endothelial	CSF2	ITGA9	CSF2 - ITGA9	CSF	0.0104487	0.00274637	-0.0499693	-0.0156075	0.00400668	0.00116861	2.8696e-05	-0.0327884	Endothelial - Endothelial	Endothelial - CSF2 - ITGA9 - Endothelial	Endothelial - CSF2	ITGA9 - Endothelial	human
Endothelial	Endothelial	CSF2	ITGB1	CSF2 - ITGB1	CSF	0.0104487	2.24898	-0.0499693	0.131115	0.00400668	0.894825	0.0234989	0.0405728	Endothelial - Endothelial	Endothelial - CSF2 - ITGB1 - Endothelial	Endothelial - CSF2	ITGB1 - Endothelial	human
Endothelial	Endothelial	CSF2	SDC2	CSF2 - SDC2	CSF	0.0104487	0.0328693	-0.0499693	-0.223341	0.00400668	0.0148581	0.000343441	-0.136655	Endothelial - Endothelial	Endothelial - CSF2 - SDC2 - Endothelial	Endothelial - CSF2	SDC2 - Endothelial	human
Endothelial	Endothelial	CSF3	CSF1R	CSF3 - CSF1R	CSF	0.0994679	0	-0.209604	-0.0516984	0.0328881	0	0	-0.130651	Endothelial - Endothelial	Endothelial - CSF3 - CSF1R - Endothelial	Endothelial - CSF3	CSF1R - Endothelial	human
Endothelial	Endothelial	CSF3	CSF3R	CSF3 - CSF3R	CSF	0.0994679	NA	-0.209604	NA	0.0328881	NA	NA	NA	Endothelial - Endothelial	Endothelial - CSF3 - CSF3R - Endothelial	Endothelial - CSF3	CSF3R - Endothelial	human
Endothelial	Endothelial	CSH1	PRLR	CSH1 - PRLR	UNCAT	NA	0	NA	-0.0367739	NA	0	NA	NA	Endothelial - Endothelial	Endothelial - CSH1 - PRLR - Endothelial	Endothelial - CSH1	PRLR - Endothelial	human
Endothelial	Endothelial	CSH2	PRLR	CSH2 - PRLR	UNCAT	NA	0	NA	-0.0367739	NA	0	NA	NA	Endothelial - Endothelial	Endothelial - CSH2 - PRLR - Endothelial	Endothelial - CSH2	PRLR - Endothelial	human
Endothelial	Endothelial	CSHL1	GHR	CSHL1 - GHR	UNCAT	NA	0.00862961	NA	-0.0201739	NA	0.00467446	NA	NA	Endothelial - Endothelial	Endothelial - CSHL1 - GHR - Endothelial	Endothelial - CSHL1	GHR - Endothelial	human
Endothelial	Endothelial	CSHL1	PRLR	CSHL1 - PRLR	UNCAT	NA	0	NA	-0.0367739	NA	0	NA	NA	Endothelial - Endothelial	Endothelial - CSHL1 - PRLR - Endothelial	Endothelial - CSHL1	PRLR - Endothelial	human
Endothelial	Endothelial	CTF1	IL6ST	CTF1 - IL6ST	Interleukins	0.00768527	1.54667	-0.0885449	0.418353	0.00417362	0.701169	0.0118866	0.164904	Endothelial - Endothelial	Endothelial - CTF1 - IL6ST - Endothelial	Endothelial - CTF1	IL6ST - Endothelial	human
Endothelial	Endothelial	CTF1	LIFR	CTF1 - LIFR	Interleukins	0.00768527	0.174125	-0.0885449	0.0165547	0.00417362	0.0891486	0.00133819	-0.0359951	Endothelial - Endothelial	Endothelial - CTF1 - LIFR - Endothelial	Endothelial - CTF1	LIFR - Endothelial	human
Endothelial	Endothelial	CTGF	ERBB4	CTGF - ERBB4	Matrix (assorted)	NA	0.000546417	NA	-0.0180449	NA	0.00033389	NA	NA	Endothelial - Endothelial	Endothelial - CTGF - ERBB4 - Endothelial	Endothelial - CTGF	ERBB4 - Endothelial	human
Endothelial	Endothelial	CTGF	ITGA5	CTGF - ITGA5	Matrix (assorted)	NA	1.13311	NA	0.244101	NA	0.556928	NA	NA	Endothelial - Endothelial	Endothelial - CTGF - ITGA5 - Endothelial	Endothelial - CTGF	ITGA5 - Endothelial	human
Endothelial	Endothelial	CTGF	ITGAM	CTGF - ITGAM	Matrix (assorted)	NA	0.000220423	NA	-0.0131065	NA	0.000166945	NA	NA	Endothelial - Endothelial	Endothelial - CTGF - ITGAM - Endothelial	Endothelial - CTGF	ITGAM - Endothelial	human
Endothelial	Endothelial	CTGF	ITGB2	CTGF - ITGB2	Matrix (assorted)	NA	0.0111766	NA	-0.176937	NA	0.00417362	NA	NA	Endothelial - Endothelial	Endothelial - CTGF - ITGB2 - Endothelial	Endothelial - CTGF	ITGB2 - Endothelial	human
Endothelial	Endothelial	CTGF	LRP1	CTGF - LRP1	Matrix (assorted)	NA	0.0314119	NA	-0.211875	NA	0.0130217	NA	NA	Endothelial - Endothelial	Endothelial - CTGF - LRP1 - Endothelial	Endothelial - CTGF	LRP1 - Endothelial	human
Endothelial	Endothelial	CTGF	LRP6	CTGF - LRP6	Matrix (assorted)	NA	0.318607	NA	0.0532664	NA	0.162437	NA	NA	Endothelial - Endothelial	Endothelial - CTGF - LRP6 - Endothelial	Endothelial - CTGF	LRP6 - Endothelial	human
Endothelial	Endothelial	CTGF	NTRK1	CTGF - NTRK1	Matrix (assorted)	NA	0.000327482	NA	-0.00740047	NA	0.000166945	NA	NA	Endothelial - Endothelial	Endothelial - CTGF - NTRK1 - Endothelial	Endothelial - CTGF	NTRK1 - Endothelial	human
Endothelial	Endothelial	CTHRC1	FZD3	CTHRC1 - FZD3	UNCAT	0.932682	0.00990708	0.0367986	-0.0346128	0.456093	0.00417362	0.00924016	0.00109288	Endothelial - Endothelial	Endothelial - CTHRC1 - FZD3 - Endothelial	Endothelial - CTHRC1	FZD3 - Endothelial	human
Endothelial	Endothelial	CTHRC1	FZD5	CTHRC1 - FZD5	UNCAT	0.932682	0.0229547	0.0367986	-0.0884791	0.456093	0.01202	0.0214094	-0.0258402	Endothelial - Endothelial	Endothelial - CTHRC1 - FZD5 - Endothelial	Endothelial - CTHRC1	FZD5 - Endothelial	human
Endothelial	Endothelial	CTHRC1	FZD6	CTHRC1 - FZD6	UNCAT	0.932682	0.375658	0.0367986	0.0934721	0.456093	0.19616	0.350369	0.0651354	Endothelial - Endothelial	Endothelial - CTHRC1 - FZD6 - Endothelial	Endothelial - CTHRC1	FZD6 - Endothelial	human
Endothelial	Endothelial	CUBN	LRP2	CUBN - LRP2	UNCAT	0.120841	0	0.136114	-0.027502	0.0729549	0	0	0.0543061	Endothelial - Endothelial	Endothelial - CUBN - LRP2 - Endothelial	Endothelial - CUBN	LRP2 - Endothelial	human
Endothelial	Endothelial	CX3CL1	CX3CR1	CX3CL1 - CX3CR1	UNCAT	0.0273249	NA	0.000778884	NA	0.0110184	NA	NA	NA	Endothelial - Endothelial	Endothelial - CX3CL1 - CX3CR1 - Endothelial	Endothelial - CX3CL1	CX3CR1 - Endothelial	human
Endothelial	Endothelial	CXCL10	CCR3	CXCL10 - CCR3	CC	0.0604502	NA	-0.00940711	NA	0.00467446	NA	NA	NA	Endothelial - Endothelial	Endothelial - CXCL10 - CCR3 - Endothelial	Endothelial - CXCL10	CCR3 - Endothelial	human
Endothelial	Endothelial	CXCL10	CXCR3	CXCL10 - CXCR3	CXCL	0.0604502	0	-0.00940711	-0.0523466	0.00467446	0	0	-0.0308768	Endothelial - Endothelial	Endothelial - CXCL10 - CXCR3 - Endothelial	Endothelial - CXCL10	CXCR3 - Endothelial	human
Endothelial	Endothelial	CXCL10	SDC4	CXCL10 - SDC4	CXCL	0.0604502	0.143708	-0.00940711	-0.386803	0.00467446	0.0676127	0.00868716	-0.198105	Endothelial - Endothelial	Endothelial - CXCL10 - SDC4 - Endothelial	Endothelial - CXCL10	SDC4 - Endothelial	human
Endothelial	Endothelial	CXCL11	ACKR3	CXCL11 - ACKR3	CXCL	0.164019	0.321611	0.144468	0.217828	0.0616027	0.126377	0.0527503	0.181148	Endothelial - Endothelial	Endothelial - CXCL11 - ACKR3 - Endothelial	Endothelial - CXCL11	ACKR3 - Endothelial	human
Endothelial	Endothelial	CXCL11	CCR3	CXCL11 - CCR3	CC	0.164019	NA	0.144468	NA	0.0616027	NA	NA	NA	Endothelial - Endothelial	Endothelial - CXCL11 - CCR3 - Endothelial	Endothelial - CXCL11	CCR3 - Endothelial	human
Endothelial	Endothelial	CXCL11	CXCR3	CXCL11 - CXCR3	CXCL	0.164019	0	0.144468	-0.0523466	0.0616027	0	0	0.0460609	Endothelial - Endothelial	Endothelial - CXCL11 - CXCR3 - Endothelial	Endothelial - CXCL11	CXCR3 - Endothelial	human
Endothelial	Endothelial	CXCL12	ACKR3	CXCL12 - ACKR3	CXCL	0.0143133	0.321611	-0.00253546	0.217828	0.00584307	0.126377	0.0046033	0.107646	Endothelial - Endothelial	Endothelial - CXCL12 - ACKR3 - Endothelial	Endothelial - CXCL12	ACKR3 - Endothelial	human
Endothelial	Endothelial	CXCL12	CCR4	CXCL12 - CCR4	CC	0.0143133	0	-0.00253546	0	0.00584307	0	0	-0.00126773	Endothelial - Endothelial	Endothelial - CXCL12 - CCR4 - Endothelial	Endothelial - CXCL12	CCR4 - Endothelial	human
Endothelial	Endothelial	CXCL12	CD4	CXCL12 - CD4	CXCL	0.0143133	0.00994187	-0.00253546	-0.158794	0.00584307	0.00300501	0.000142301	-0.0806647	Endothelial - Endothelial	Endothelial - CXCL12 - CD4 - Endothelial	Endothelial - CXCL12	CD4 - Endothelial	human
Endothelial	Endothelial	CXCL12	CXCR3	CXCL12 - CXCR3	CXCL	0.0143133	0	-0.00253546	-0.0523466	0.00584307	0	0	-0.027441	Endothelial - Endothelial	Endothelial - CXCL12 - CXCR3 - Endothelial	Endothelial - CXCL12	CXCR3 - Endothelial	human
Endothelial	Endothelial	CXCL12	CXCR4	CXCL12 - CXCR4	CXCL	0.0143133	1.21491	-0.00253546	0.444743	0.00584307	0.45576	0.0173893	0.221104	Endothelial - Endothelial	Endothelial - CXCL12 - CXCR4 - Endothelial	Endothelial - CXCL12	CXCR4 - Endothelial	human
Endothelial	Endothelial	CXCL12	ITGB1	CXCL12 - ITGB1	CXCL	0.0143133	2.24898	-0.00253546	0.131115	0.00584307	0.894825	0.0321903	0.0642897	Endothelial - Endothelial	Endothelial - CXCL12 - ITGB1 - Endothelial	Endothelial - CXCL12	ITGB1 - Endothelial	human
Endothelial	Endothelial	CXCL12	SDC4	CXCL12 - SDC4	CXCL	0.0143133	0.143708	-0.00253546	-0.386803	0.00584307	0.0676127	0.00205693	-0.194669	Endothelial - Endothelial	Endothelial - CXCL12 - SDC4 - Endothelial	Endothelial - CXCL12	SDC4 - Endothelial	human
Endothelial	Endothelial	CXCL13	ACKR4	CXCL13 - ACKR4	CXCL	NA	0.17573	NA	0.159432	NA	0.0714524	NA	NA	Endothelial - Endothelial	Endothelial - CXCL13 - ACKR4 - Endothelial	Endothelial - CXCL13	ACKR4 - Endothelial	human
Endothelial	Endothelial	CXCL13	CCR10	CXCL13 - CCR10	CC	NA	0.018162	NA	-0.0130639	NA	0.0110184	NA	NA	Endothelial - Endothelial	Endothelial - CXCL13 - CCR10 - Endothelial	Endothelial - CXCL13	CCR10 - Endothelial	human
Endothelial	Endothelial	CXCL13	CXCR3	CXCL13 - CXCR3	CXCL	NA	0	NA	-0.0523466	NA	0	NA	NA	Endothelial - Endothelial	Endothelial - CXCL13 - CXCR3 - Endothelial	Endothelial - CXCL13	CXCR3 - Endothelial	human
Endothelial	Endothelial	CXCL13	CXCR5	CXCL13 - CXCR5	CXCL	NA	0.00097948	NA	-0.0172931	NA	0.000500835	NA	NA	Endothelial - Endothelial	Endothelial - CXCL13 - CXCR5 - Endothelial	Endothelial - CXCL13	CXCR5 - Endothelial	human
Endothelial	Endothelial	CXCL13	HTR2A	CXCL13 - HTR2A	CXCL	NA	0.000189155	NA	-0.0161824	NA	0.000166945	NA	NA	Endothelial - Endothelial	Endothelial - CXCL13 - HTR2A - Endothelial	Endothelial - CXCL13	HTR2A - Endothelial	human
Endothelial	Endothelial	CXCL13	OPRD1	CXCL13 - OPRD1	CXCL	NA	0	NA	-0.0155593	NA	0	NA	NA	Endothelial - Endothelial	Endothelial - CXCL13 - OPRD1 - Endothelial	Endothelial - CXCL13	OPRD1 - Endothelial	human
Endothelial	Endothelial	CXCL16	CXCR6	CXCL16 - CXCR6	CXCL	0.0206912	0	-0.0933499	-0.0178674	0.0123539	0	0	-0.0556086	Endothelial - Endothelial	Endothelial - CXCL16 - CXCR6 - Endothelial	Endothelial - CXCL16	CXCR6 - Endothelial	human
Endothelial	Endothelial	CXCL1	CXCR1	CXCL1 - CXCR1	CXCL	0.772743	NA	-0.27895	NA	0.210351	NA	NA	NA	Endothelial - Endothelial	Endothelial - CXCL1 - CXCR1 - Endothelial	Endothelial - CXCL1	CXCR1 - Endothelial	human
Endothelial	Endothelial	CXCL1	CXCR2	CXCL1 - CXCR2	CXCL	0.772743	NA	-0.27895	NA	0.210351	NA	NA	NA	Endothelial - Endothelial	Endothelial - CXCL1 - CXCR2 - Endothelial	Endothelial - CXCL1	CXCR2 - Endothelial	human
Endothelial	Endothelial	CXCL1	DARC	CXCL1 - DARC	CXCL	0.772743	NA	-0.27895	NA	0.210351	NA	NA	NA	Endothelial - Endothelial	Endothelial - CXCL1 - DARC - Endothelial	Endothelial - CXCL1	DARC - Endothelial	human
Endothelial	Endothelial	CXCL2	CXCR1	CXCL2 - CXCR1	CXCL	0.30964	NA	0.0289399	NA	0.0906511	NA	NA	NA	Endothelial - Endothelial	Endothelial - CXCL2 - CXCR1 - Endothelial	Endothelial - CXCL2	CXCR1 - Endothelial	human
Endothelial	Endothelial	CXCL2	CXCR2	CXCL2 - CXCR2	CXCL	0.30964	NA	0.0289399	NA	0.0906511	NA	NA	NA	Endothelial - Endothelial	Endothelial - CXCL2 - CXCR2 - Endothelial	Endothelial - CXCL2	CXCR2 - Endothelial	human
Endothelial	Endothelial	CXCL2	XCR1	CXCL2 - XCR1	CXCL	0.30964	NA	0.0289399	NA	0.0906511	NA	NA	NA	Endothelial - Endothelial	Endothelial - CXCL2 - XCR1 - Endothelial	Endothelial - CXCL2	XCR1 - Endothelial	human
Endothelial	Endothelial	CXCL3	CXCR1	CXCL3 - CXCR1	CXCL	0.213428	NA	-0.30001	NA	0.0674457	NA	NA	NA	Endothelial - Endothelial	Endothelial - CXCL3 - CXCR1 - Endothelial	Endothelial - CXCL3	CXCR1 - Endothelial	human
Endothelial	Endothelial	CXCL3	CXCR2	CXCL3 - CXCR2	CXCL	0.213428	NA	-0.30001	NA	0.0674457	NA	NA	NA	Endothelial - Endothelial	Endothelial - CXCL3 - CXCR2 - Endothelial	Endothelial - CXCL3	CXCR2 - Endothelial	human
Endothelial	Endothelial	CXCL5	CXCR1	CXCL5 - CXCR1	CXCL	0.263584	NA	-0.318002	NA	0.0707846	NA	NA	NA	Endothelial - Endothelial	Endothelial - CXCL5 - CXCR1 - Endothelial	Endothelial - CXCL5	CXCR1 - Endothelial	human
Endothelial	Endothelial	CXCL5	CXCR2	CXCL5 - CXCR2	CXCL	0.263584	NA	-0.318002	NA	0.0707846	NA	NA	NA	Endothelial - Endothelial	Endothelial - CXCL5 - CXCR2 - Endothelial	Endothelial - CXCL5	CXCR2 - Endothelial	human
Endothelial	Endothelial	CXCL5	DARC	CXCL5 - DARC	CXCL	0.263584	NA	-0.318002	NA	0.0707846	NA	NA	NA	Endothelial - Endothelial	Endothelial - CXCL5 - DARC - Endothelial	Endothelial - CXCL5	DARC - Endothelial	human
Endothelial	Endothelial	CXCL6	CXCR1	CXCL6 - CXCR1	CXCL	0.17278	NA	-0.261981	NA	0.0612688	NA	NA	NA	Endothelial - Endothelial	Endothelial - CXCL6 - CXCR1 - Endothelial	Endothelial - CXCL6	CXCR1 - Endothelial	human
Endothelial	Endothelial	CXCL6	CXCR2	CXCL6 - CXCR2	CXCL	0.17278	NA	-0.261981	NA	0.0612688	NA	NA	NA	Endothelial - Endothelial	Endothelial - CXCL6 - CXCR2 - Endothelial	Endothelial - CXCL6	CXCR2 - Endothelial	human
Endothelial	Endothelial	CXCL9	CCR3	CXCL9 - CCR3	CC	NA	NA	NA	NA	NA	NA	NA	NA	Endothelial - Endothelial	Endothelial - CXCL9 - CCR3 - Endothelial	Endothelial - CXCL9	CCR3 - Endothelial	human
Endothelial	Endothelial	CXCL9	CXCR3	CXCL9 - CXCR3	CXCL	NA	0	NA	-0.0523466	NA	0	NA	NA	Endothelial - Endothelial	Endothelial - CXCL9 - CXCR3 - Endothelial	Endothelial - CXCL9	CXCR3 - Endothelial	human
Endothelial	Endothelial	CYR61	CAV1	CYR61 - CAV1	Matrix (assorted)	NA	2.87609	NA	0.242337	NA	0.941402	NA	NA	Endothelial - Endothelial	Endothelial - CYR61 - CAV1 - Endothelial	Endothelial - CYR61	CAV1 - Endothelial	human
Endothelial	Endothelial	CYR61	ITGA5	CYR61 - ITGA5	Matrix (assorted)	NA	1.13311	NA	0.244101	NA	0.556928	NA	NA	Endothelial - Endothelial	Endothelial - CYR61 - ITGA5 - Endothelial	Endothelial - CYR61	ITGA5 - Endothelial	human
Endothelial	Endothelial	CYR61	ITGAM	CYR61 - ITGAM	Matrix (assorted)	NA	0.000220423	NA	-0.0131065	NA	0.000166945	NA	NA	Endothelial - Endothelial	Endothelial - CYR61 - ITGAM - Endothelial	Endothelial - CYR61	ITGAM - Endothelial	human
Endothelial	Endothelial	CYR61	ITGAV	CYR61 - ITGAV	Matrix (assorted)	NA	0.857661	NA	0.117173	NA	0.425543	NA	NA	Endothelial - Endothelial	Endothelial - CYR61 - ITGAV - Endothelial	Endothelial - CYR61	ITGAV - Endothelial	human
Endothelial	Endothelial	CYR61	ITGB2	CYR61 - ITGB2	Matrix (assorted)	NA	0.0111766	NA	-0.176937	NA	0.00417362	NA	NA	Endothelial - Endothelial	Endothelial - CYR61 - ITGB2 - Endothelial	Endothelial - CYR61	ITGB2 - Endothelial	human
Endothelial	Endothelial	CYR61	ITGB3	CYR61 - ITGB3	Matrix (assorted)	NA	0.0218954	NA	-0.0518058	NA	0.0135225	NA	NA	Endothelial - Endothelial	Endothelial - CYR61 - ITGB3 - Endothelial	Endothelial - CYR61	ITGB3 - Endothelial	human
Endothelial	Endothelial	CYR61	ITGB5	CYR61 - ITGB5	Matrix (assorted)	NA	0.172209	NA	-0.0829851	NA	0.0863105	NA	NA	Endothelial - Endothelial	Endothelial - CYR61 - ITGB5 - Endothelial	Endothelial - CYR61	ITGB5 - Endothelial	human
Endothelial	Endothelial	DCN	EGFR	DCN - EGFR	EGF	0.267177	0.0549946	-0.337504	-0.344129	0.0988314	0.0245409	0.0146933	-0.340817	Endothelial - Endothelial	Endothelial - DCN - EGFR - Endothelial	Endothelial - DCN	EGFR - Endothelial	human
Endothelial	Endothelial	DCN	ERBB4	DCN - ERBB4	UNCAT	0.267177	0.000546417	-0.337504	-0.0180449	0.0988314	0.00033389	0.00014599	-0.177774	Endothelial - Endothelial	Endothelial - DCN - ERBB4 - Endothelial	Endothelial - DCN	ERBB4 - Endothelial	human
Endothelial	Endothelial	DCN	MET	DCN - MET	MET	0.267177	0.465896	-0.337504	-0.11602	0.0988314	0.238063	0.124477	-0.226762	Endothelial - Endothelial	Endothelial - DCN - MET - Endothelial	Endothelial - DCN	MET - Endothelial	human
Endothelial	Endothelial	DEFB103A	CCR6	DEFB103A - CCR6	CC	NA	0.000260086	NA	-0.0131982	NA	0.000166945	NA	NA	Endothelial - Endothelial	Endothelial - DEFB103A - CCR6 - Endothelial	Endothelial - DEFB103A	CCR6 - Endothelial	human
Endothelial	Endothelial	DEFB103B	CCR2	DEFB103B - CCR2	CC	NA	NA	NA	NA	NA	NA	NA	NA	Endothelial - Endothelial	Endothelial - DEFB103B - CCR2 - Endothelial	Endothelial - DEFB103B	CCR2 - Endothelial	human
Endothelial	Endothelial	DEFB103B	CCR6	DEFB103B - CCR6	CC	NA	0.000260086	NA	-0.0131982	NA	0.000166945	NA	NA	Endothelial - Endothelial	Endothelial - DEFB103B - CCR6 - Endothelial	Endothelial - DEFB103B	CCR6 - Endothelial	human
Endothelial	Endothelial	DEFB1	CCR6	DEFB1 - CCR6	CC	0.000216479	0.000260086	-0.0405654	-0.0131982	0.000166945	0.000166945	5.63031e-08	-0.0268818	Endothelial - Endothelial	Endothelial - DEFB1 - CCR6 - Endothelial	Endothelial - DEFB1	CCR6 - Endothelial	human
Endothelial	Endothelial	DEFB4A	CCR6	DEFB4A - CCR6	CC	0	0.000260086	-0.0191008	-0.0131982	0	0.000166945	0	-0.0161495	Endothelial - Endothelial	Endothelial - DEFB4A - CCR6 - Endothelial	Endothelial - DEFB4A	CCR6 - Endothelial	human
Endothelial	Endothelial	DEFB4A	TLR4	DEFB4A - TLR4	TLR	0	0.0960364	-0.0191008	0.119213	0	0.0560935	0	0.0500562	Endothelial - Endothelial	Endothelial - DEFB4A - TLR4 - Endothelial	Endothelial - DEFB4A	TLR4 - Endothelial	human
Endothelial	Endothelial	DEFB4B	CCR6	DEFB4B - CCR6	CC	NA	0.000260086	NA	-0.0131982	NA	0.000166945	NA	NA	Endothelial - Endothelial	Endothelial - DEFB4B - CCR6 - Endothelial	Endothelial - DEFB4B	CCR6 - Endothelial	human
Endothelial	Endothelial	DHH	BOC	DHH - BOC	Hedgehog	0.00828982	0.000391262	-0.00132359	-0.0243957	0.00500835	0.000166945	3.24349e-06	-0.0128596	Endothelial - Endothelial	Endothelial - DHH - BOC - Endothelial	Endothelial - DHH	BOC - Endothelial	human
Endothelial	Endothelial	DHH	CDON	DHH - CDON	Hedgehog	0.00828982	0.00509079	-0.00132359	-0.0328425	0.00500835	0.00300501	4.22017e-05	-0.017083	Endothelial - Endothelial	Endothelial - DHH - CDON - Endothelial	Endothelial - DHH	CDON - Endothelial	human
Endothelial	Endothelial	DHH	HHIP	DHH - HHIP	Hedgehog	0.00828982	0.923023	-0.00132359	0.29231	0.00500835	0.379967	0.00765169	0.145493	Endothelial - Endothelial	Endothelial - DHH - HHIP - Endothelial	Endothelial - DHH	HHIP - Endothelial	human
Endothelial	Endothelial	DHH	PTCH1	DHH - PTCH1	Hedgehog	0.00828982	0.0632649	-0.00132359	0.0590316	0.00500835	0.0330551	0.000524454	0.028854	Endothelial - Endothelial	Endothelial - DHH - PTCH1 - Endothelial	Endothelial - DHH	PTCH1 - Endothelial	human
Endothelial	Endothelial	DHH	PTCH2	DHH - PTCH2	Hedgehog	0.00828982	0.000373594	-0.00132359	-0.029241	0.00500835	0.00033389	3.09703e-06	-0.0152823	Endothelial - Endothelial	Endothelial - DHH - PTCH2 - Endothelial	Endothelial - DHH	PTCH2 - Endothelial	human
Endothelial	Endothelial	DKK1	KREMEN1	DKK1 - KREMEN1	WNT	0.0632428	0.00366068	-0.136375	-0.113449	0.0382304	0.00166945	0.000231512	-0.124912	Endothelial - Endothelial	Endothelial - DKK1 - KREMEN1 - Endothelial	Endothelial - DKK1	KREMEN1 - Endothelial	human
Endothelial	Endothelial	DKK1	KREMEN2	DKK1 - KREMEN2	WNT	0.0632428	0.000144431	-0.136375	-0.0484472	0.0382304	0.000166945	9.13419e-06	-0.0924109	Endothelial - Endothelial	Endothelial - DKK1 - KREMEN2 - Endothelial	Endothelial - DKK1	KREMEN2 - Endothelial	human
Endothelial	Endothelial	DKK1	LRP5	DKK1 - LRP5	WNT	0.0632428	0.159593	-0.136375	0.0255498	0.0382304	0.0803005	0.0100931	-0.0554124	Endothelial - Endothelial	Endothelial - DKK1 - LRP5 - Endothelial	Endothelial - DKK1	LRP5 - Endothelial	human
Endothelial	Endothelial	DKK1	LRP6	DKK1 - LRP6	WNT	0.0632428	0.318607	-0.136375	0.0532664	0.0382304	0.162437	0.0201496	-0.0415541	Endothelial - Endothelial	Endothelial - DKK1 - LRP6 - Endothelial	Endothelial - DKK1	LRP6 - Endothelial	human
Endothelial	Endothelial	DKK2	KREMEN2	DKK2 - KREMEN2	WNT	0.00331843	0.000144431	-0.0249226	-0.0484472	0.00283806	0.000166945	4.79282e-07	-0.0366849	Endothelial - Endothelial	Endothelial - DKK2 - KREMEN2 - Endothelial	Endothelial - DKK2	KREMEN2 - Endothelial	human
Endothelial	Endothelial	DKK2	LRP6	DKK2 - LRP6	WNT	0.00331843	0.318607	-0.0249226	0.0532664	0.00283806	0.162437	0.00105727	0.0141719	Endothelial - Endothelial	Endothelial - DKK2 - LRP6 - Endothelial	Endothelial - DKK2	LRP6 - Endothelial	human
Endothelial	Endothelial	DLK1	NOTCH1	DLK1 - NOTCH1	NOTCH	NA	0.364756	NA	0.227751	NA	0.181135	NA	NA	Endothelial - Endothelial	Endothelial - DLK1 - NOTCH1 - Endothelial	Endothelial - DLK1	NOTCH1 - Endothelial	human
Endothelial	Endothelial	DLK1	NOTCH2	DLK1 - NOTCH2	NOTCH	NA	0.063638	NA	-0.265272	NA	0.0372287	NA	NA	Endothelial - Endothelial	Endothelial - DLK1 - NOTCH2 - Endothelial	Endothelial - DLK1	NOTCH2 - Endothelial	human
Endothelial	Endothelial	DLK1	NOTCH3	DLK1 - NOTCH3	NOTCH	NA	0.028917	NA	-0.237327	NA	0.0111853	NA	NA	Endothelial - Endothelial	Endothelial - DLK1 - NOTCH3 - Endothelial	Endothelial - DLK1	NOTCH3 - Endothelial	human
Endothelial	Endothelial	DLK1	NOTCH4	DLK1 - NOTCH4	NOTCH	NA	0.648718	NA	0.315057	NA	0.295659	NA	NA	Endothelial - Endothelial	Endothelial - DLK1 - NOTCH4 - Endothelial	Endothelial - DLK1	NOTCH4 - Endothelial	human
Endothelial	Endothelial	DLK2	NOTCH1	DLK2 - NOTCH1	NOTCH	0.000555869	0.364756	-0.0140966	0.227751	0.00033389	0.181135	0.000202757	0.106827	Endothelial - Endothelial	Endothelial - DLK2 - NOTCH1 - Endothelial	Endothelial - DLK2	NOTCH1 - Endothelial	human
Endothelial	Endothelial	DLL1	NOTCH1	DLL1 - NOTCH1	NOTCH	0.0494163	0.364756	0.0610159	0.227751	0.021202	0.181135	0.0180249	0.144384	Endothelial - Endothelial	Endothelial - DLL1 - NOTCH1 - Endothelial	Endothelial - DLL1	NOTCH1 - Endothelial	human
Endothelial	Endothelial	DLL1	NOTCH2	DLL1 - NOTCH2	NOTCH	0.0494163	0.063638	0.0610159	-0.265272	0.021202	0.0372287	0.00314476	-0.102128	Endothelial - Endothelial	Endothelial - DLL1 - NOTCH2 - Endothelial	Endothelial - DLL1	NOTCH2 - Endothelial	human
Endothelial	Endothelial	DLL1	NOTCH3	DLL1 - NOTCH3	NOTCH	0.0494163	0.028917	0.0610159	-0.237327	0.021202	0.0111853	0.00142897	-0.0881558	Endothelial - Endothelial	Endothelial - DLL1 - NOTCH3 - Endothelial	Endothelial - DLL1	NOTCH3 - Endothelial	human
Endothelial	Endothelial	DLL1	NOTCH4	DLL1 - NOTCH4	NOTCH	0.0494163	0.648718	0.0610159	0.315057	0.021202	0.295659	0.0320573	0.188036	Endothelial - Endothelial	Endothelial - DLL1 - NOTCH4 - Endothelial	Endothelial - DLL1	NOTCH4 - Endothelial	human
Endothelial	Endothelial	DLL3	NOTCH1	DLL3 - NOTCH1	NOTCH	0.00597214	0.364756	-0.067426	0.227751	0.00400668	0.181135	0.00217838	0.0801627	Endothelial - Endothelial	Endothelial - DLL3 - NOTCH1 - Endothelial	Endothelial - DLL3	NOTCH1 - Endothelial	human
Endothelial	Endothelial	DLL3	NOTCH2	DLL3 - NOTCH2	NOTCH	0.00597214	0.063638	-0.067426	-0.265272	0.00400668	0.0372287	0.000380055	-0.166349	Endothelial - Endothelial	Endothelial - DLL3 - NOTCH2 - Endothelial	Endothelial - DLL3	NOTCH2 - Endothelial	human
Endothelial	Endothelial	DLL3	NOTCH3	DLL3 - NOTCH3	NOTCH	0.00597214	0.028917	-0.067426	-0.237327	0.00400668	0.0111853	0.000172696	-0.152377	Endothelial - Endothelial	Endothelial - DLL3 - NOTCH3 - Endothelial	Endothelial - DLL3	NOTCH3 - Endothelial	human
Endothelial	Endothelial	DLL3	NOTCH4	DLL3 - NOTCH4	NOTCH	0.00597214	0.648718	-0.067426	0.315057	0.00400668	0.295659	0.00387424	0.123815	Endothelial - Endothelial	Endothelial - DLL3 - NOTCH4 - Endothelial	Endothelial - DLL3	NOTCH4 - Endothelial	human
Endothelial	Endothelial	DLL4	NOTCH1	DLL4 - NOTCH1	NOTCH	0.216044	0.364756	0.17329	0.227751	0.093823	0.181135	0.0788033	0.200521	Endothelial - Endothelial	Endothelial - DLL4 - NOTCH1 - Endothelial	Endothelial - DLL4	NOTCH1 - Endothelial	human
Endothelial	Endothelial	DLL4	NOTCH2	DLL4 - NOTCH2	NOTCH	0.216044	0.063638	0.17329	-0.265272	0.093823	0.0372287	0.0137486	-0.0459908	Endothelial - Endothelial	Endothelial - DLL4 - NOTCH2 - Endothelial	Endothelial - DLL4	NOTCH2 - Endothelial	human
Endothelial	Endothelial	DLL4	NOTCH3	DLL4 - NOTCH3	NOTCH	0.216044	0.028917	0.17329	-0.237327	0.093823	0.0111853	0.00624733	-0.0320188	Endothelial - Endothelial	Endothelial - DLL4 - NOTCH3 - Endothelial	Endothelial - DLL4	NOTCH3 - Endothelial	human
Endothelial	Endothelial	DLL4	NOTCH4	DLL4 - NOTCH4	NOTCH	0.216044	0.648718	0.17329	0.315057	0.093823	0.295659	0.140152	0.244173	Endothelial - Endothelial	Endothelial - DLL4 - NOTCH4 - Endothelial	Endothelial - DLL4	NOTCH4 - Endothelial	human
Endothelial	Endothelial	DSCAM	DCC	DSCAM - DCC	UNCAT	0	NA	-0.00907144	NA	0	NA	NA	NA	Endothelial - Endothelial	Endothelial - DSCAM - DCC - Endothelial	Endothelial - DSCAM	DCC - Endothelial	human
Endothelial	Endothelial	EBI3	IL27RA	EBI3 - IL27RA	UNCAT	0.00388811	0.0835386	-0.0244009	-0.0863737	0.0015025	0.0355593	0.000324807	-0.0553873	Endothelial - Endothelial	Endothelial - EBI3 - IL27RA - Endothelial	Endothelial - EBI3	IL27RA - Endothelial	human
Endothelial	Endothelial	EBI3	IL6ST	EBI3 - IL6ST	UNCAT	0.00388811	1.54667	-0.0244009	0.418353	0.0015025	0.701169	0.00601364	0.196976	Endothelial - Endothelial	Endothelial - EBI3 - IL6ST - Endothelial	Endothelial - EBI3	IL6ST - Endothelial	human
Endothelial	Endothelial	ECM1	CACHD1	ECM1 - CACHD1	UNCAT	0.0321921	0.0930769	-0.17039	0.111117	0.0153589	0.0442404	0.00299634	-0.0296365	Endothelial - Endothelial	Endothelial - ECM1 - CACHD1 - Endothelial	Endothelial - ECM1	CACHD1 - Endothelial	human
Endothelial	Endothelial	EDA	EDA2R	EDA - EDA2R	TNF	0.00597164	0.0181814	-0.0333774	-0.0393945	0.00367279	0.0110184	0.000108573	-0.036386	Endothelial - Endothelial	Endothelial - EDA - EDA2R - Endothelial	Endothelial - EDA	EDA2R - Endothelial	human
Endothelial	Endothelial	EDA	EDAR	EDA - EDAR	TNF	0.00597164	NA	-0.0333774	NA	0.00367279	NA	NA	NA	Endothelial - Endothelial	Endothelial - EDA - EDAR - Endothelial	Endothelial - EDA	EDAR - Endothelial	human
Endothelial	Endothelial	EDIL3	ITGAV	EDIL3 - ITGAV	Interleukins	0.152097	0.857661	-0.0231413	0.117173	0.0791319	0.425543	0.130447	0.0470156	Endothelial - Endothelial	Endothelial - EDIL3 - ITGAV - Endothelial	Endothelial - EDIL3	ITGAV - Endothelial	human
Endothelial	Endothelial	EDIL3	ITGB5	EDIL3 - ITGB5	Interleukins	0.152097	0.172209	-0.0231413	-0.0829851	0.0791319	0.0863105	0.0261924	-0.0530632	Endothelial - Endothelial	Endothelial - EDIL3 - ITGB5 - Endothelial	Endothelial - EDIL3	ITGB5 - Endothelial	human
Endothelial	Endothelial	EDN1	EDNRA	EDN1 - EDNRA	Vasoactive	1.44115	0.0186949	0.403055	-0.166284	0.468781	0.0048414	0.0269423	0.118385	Endothelial - Endothelial	Endothelial - EDN1 - EDNRA - Endothelial	Endothelial - EDN1	EDNRA - Endothelial	human
Endothelial	Endothelial	EDN1	EDNRB	EDN1 - EDNRB	Vasoactive	1.44115	0.164908	0.403055	0.158907	0.468781	0.0754591	0.237658	0.280981	Endothelial - Endothelial	Endothelial - EDN1 - EDNRB - Endothelial	Endothelial - EDN1	EDNRB - Endothelial	human
Endothelial	Endothelial	EDN1	ELTD1	EDN1 - ELTD1	Vasoactive	1.44115	NA	0.403055	NA	0.468781	NA	NA	NA	Endothelial - Endothelial	Endothelial - EDN1 - ELTD1 - Endothelial	Endothelial - EDN1	ELTD1 - Endothelial	human
Endothelial	Endothelial	EDN1	KEL	EDN1 - KEL	Vasoactive	1.44115	NA	0.403055	NA	0.468781	NA	NA	NA	Endothelial - Endothelial	Endothelial - EDN1 - KEL - Endothelial	Endothelial - EDN1	KEL - Endothelial	human
Endothelial	Endothelial	EDN2	EDNRA	EDN2 - EDNRA	UNCAT	0	0.0186949	-0.0414461	-0.166284	0	0.0048414	0	-0.103865	Endothelial - Endothelial	Endothelial - EDN2 - EDNRA - Endothelial	Endothelial - EDN2	EDNRA - Endothelial	human
Endothelial	Endothelial	EDN2	EDNRB	EDN2 - EDNRB	UNCAT	0	0.164908	-0.0414461	0.158907	0	0.0754591	0	0.0587302	Endothelial - Endothelial	Endothelial - EDN2 - EDNRB - Endothelial	Endothelial - EDN2	EDNRB - Endothelial	human
Endothelial	Endothelial	EDN2	KEL	EDN2 - KEL	UNCAT	0	NA	-0.0414461	NA	0	NA	NA	NA	Endothelial - Endothelial	Endothelial - EDN2 - KEL - Endothelial	Endothelial - EDN2	KEL - Endothelial	human
Endothelial	Endothelial	EDN3	EDNRA	EDN3 - EDNRA	UNCAT	NA	0.0186949	NA	-0.166284	NA	0.0048414	NA	NA	Endothelial - Endothelial	Endothelial - EDN3 - EDNRA - Endothelial	Endothelial - EDN3	EDNRA - Endothelial	human
Endothelial	Endothelial	EDN3	EDNRB	EDN3 - EDNRB	UNCAT	NA	0.164908	NA	0.158907	NA	0.0754591	NA	NA	Endothelial - Endothelial	Endothelial - EDN3 - EDNRB - Endothelial	Endothelial - EDN3	EDNRB - Endothelial	human
Endothelial	Endothelial	EDN3	KEL	EDN3 - KEL	UNCAT	NA	NA	NA	NA	NA	NA	NA	NA	Endothelial - Endothelial	Endothelial - EDN3 - KEL - Endothelial	Endothelial - EDN3	KEL - Endothelial	human
Endothelial	Endothelial	EFEMP1	EGFR	EFEMP1 - EGFR	EGF	2.16562	0.0549946	0.52559	-0.344129	0.731386	0.0245409	0.119097	0.0907305	Endothelial - Endothelial	Endothelial - EFEMP1 - EGFR - Endothelial	Endothelial - EFEMP1	EGFR - Endothelial	human
Endothelial	Endothelial	EFEMP2	AQP1	EFEMP2 - AQP1	UNCAT	0.270856	0.62821	-0.101203	0.313894	0.14424	0.253589	0.170154	0.106346	Endothelial - Endothelial	Endothelial - EFEMP2 - AQP1 - Endothelial	Endothelial - EFEMP2	AQP1 - Endothelial	human
Endothelial	Endothelial	EFEMP2	CATSPER1	EFEMP2 - CATSPER1	UNCAT	0.270856	0.00562671	-0.101203	-0.10694	0.14424	0.00233723	0.00152403	-0.104071	Endothelial - Endothelial	Endothelial - EFEMP2 - CATSPER1 - Endothelial	Endothelial - EFEMP2	CATSPER1 - Endothelial	human
Endothelial	Endothelial	EFEMP2	LINGO1	EFEMP2 - LINGO1	UNCAT	0.270856	0	-0.101203	-0.0124166	0.14424	0	0	-0.0568096	Endothelial - Endothelial	Endothelial - EFEMP2 - LINGO1 - Endothelial	Endothelial - EFEMP2	LINGO1 - Endothelial	human
Endothelial	Endothelial	EFEMP2	PLSCR4	EFEMP2 - PLSCR4	UNCAT	0.270856	0.426289	-0.101203	0.185518	0.14424	0.214858	0.115463	0.0421579	Endothelial - Endothelial	Endothelial - EFEMP2 - PLSCR4 - Endothelial	Endothelial - EFEMP2	PLSCR4 - Endothelial	human
Endothelial	Endothelial	EFNA1	EPHA1	EFNA1 - EPHA1	Ephrins	0.685917	0.00609948	0.248713	-0.132584	0.34374	0.00267112	0.00418374	0.0580641	Endothelial - Endothelial	Endothelial - EFNA1 - EPHA1 - Endothelial	Endothelial - EFNA1	EPHA1 - Endothelial	human
Endothelial	Endothelial	EFNA1	EPHA2	EFNA1 - EPHA2	Ephrins	0.685917	0.176947	0.248713	0.0613052	0.34374	0.0941569	0.121371	0.155009	Endothelial - Endothelial	Endothelial - EFNA1 - EPHA2 - Endothelial	Endothelial - EFNA1	EPHA2 - Endothelial	human
Endothelial	Endothelial	EFNA1	EPHA3	EFNA1 - EPHA3	Ephrins	0.685917	0	0.248713	-0.0156317	0.34374	0	0	0.11654	Endothelial - Endothelial	Endothelial - EFNA1 - EPHA3 - Endothelial	Endothelial - EFNA1	EPHA3 - Endothelial	human
Endothelial	Endothelial	EFNA1	EPHA4	EFNA1 - EPHA4	Ephrins	0.685917	0.266909	0.248713	0.184035	0.34374	0.14207	0.183077	0.216374	Endothelial - Endothelial	Endothelial - EFNA1 - EPHA4 - Endothelial	Endothelial - EFNA1	EPHA4 - Endothelial	human
Endothelial	Endothelial	EFNA1	EPHA5	EFNA1 - EPHA5	Ephrins	0.685917	0.000889708	0.248713	-0.014575	0.34374	0.00100167	0.000610266	0.117069	Endothelial - Endothelial	Endothelial - EFNA1 - EPHA5 - Endothelial	Endothelial - EFNA1	EPHA5 - Endothelial	human
Endothelial	Endothelial	EFNA1	EPHA6	EFNA1 - EPHA6	Ephrins	0.685917	0.000307402	0.248713	-0.0225792	0.34374	0.000166945	0.000210852	0.113067	Endothelial - Endothelial	Endothelial - EFNA1 - EPHA6 - Endothelial	Endothelial - EFNA1	EPHA6 - Endothelial	human
Endothelial	Endothelial	EFNA1	EPHA7	EFNA1 - EPHA7	Ephrins	0.685917	0.00259711	0.248713	-0.010377	0.34374	0.00066778	0.0017814	0.119168	Endothelial - Endothelial	Endothelial - EFNA1 - EPHA7 - Endothelial	Endothelial - EFNA1	EPHA7 - Endothelial	human
Endothelial	Endothelial	EFNA1	EPHA8	EFNA1 - EPHA8	Ephrins	0.685917	0	0.248713	-0.0121927	0.34374	0	0	0.11826	Endothelial - Endothelial	Endothelial - EFNA1 - EPHA8 - Endothelial	Endothelial - EFNA1	EPHA8 - Endothelial	human
Endothelial	Endothelial	EFNA1	EPHB1	EFNA1 - EPHB1	Ephrins	0.685917	0.142579	0.248713	0.0837379	0.34374	0.0686144	0.0977977	0.166225	Endothelial - Endothelial	Endothelial - EFNA1 - EPHB1 - Endothelial	Endothelial - EFNA1	EPHB1 - Endothelial	human
Endothelial	Endothelial	EFNA1	EPHB6	EFNA1 - EPHB6	Ephrins	0.685917	0.0067644	0.248713	-0.0257636	0.34374	0.0033389	0.00463982	0.111475	Endothelial - Endothelial	Endothelial - EFNA1 - EPHB6 - Endothelial	Endothelial - EFNA1	EPHB6 - Endothelial	human
Endothelial	Endothelial	EFNA2	EPHA1	EFNA2 - EPHA1	Ephrins	0.00258325	0.00609948	-0.0515137	-0.132584	0.00183639	0.00267112	1.57564e-05	-0.0920491	Endothelial - Endothelial	Endothelial - EFNA2 - EPHA1 - Endothelial	Endothelial - EFNA2	EPHA1 - Endothelial	human
Endothelial	Endothelial	EFNA2	EPHA2	EFNA2 - EPHA2	Ephrins	0.00258325	0.176947	-0.0515137	0.0613052	0.00183639	0.0941569	0.000457098	0.00489578	Endothelial - Endothelial	Endothelial - EFNA2 - EPHA2 - Endothelial	Endothelial - EFNA2	EPHA2 - Endothelial	human
Endothelial	Endothelial	EFNA2	EPHA3	EFNA2 - EPHA3	Ephrins	0.00258325	0	-0.0515137	-0.0156317	0.00183639	0	0	-0.0335727	Endothelial - Endothelial	Endothelial - EFNA2 - EPHA3 - Endothelial	Endothelial - EFNA2	EPHA3 - Endothelial	human
Endothelial	Endothelial	EFNA2	EPHA4	EFNA2 - EPHA4	Ephrins	0.00258325	0.266909	-0.0515137	0.184035	0.00183639	0.14207	0.000689491	0.0662608	Endothelial - Endothelial	Endothelial - EFNA2 - EPHA4 - Endothelial	Endothelial - EFNA2	EPHA4 - Endothelial	human
Endothelial	Endothelial	EFNA2	EPHA5	EFNA2 - EPHA5	Ephrins	0.00258325	0.000889708	-0.0515137	-0.014575	0.00183639	0.00100167	2.29833e-06	-0.0330443	Endothelial - Endothelial	Endothelial - EFNA2 - EPHA5 - Endothelial	Endothelial - EFNA2	EPHA5 - Endothelial	human
Endothelial	Endothelial	EFNA2	EPHA6	EFNA2 - EPHA6	Ephrins	0.00258325	0.000307402	-0.0515137	-0.0225792	0.00183639	0.000166945	7.94095e-07	-0.0370465	Endothelial - Endothelial	Endothelial - EFNA2 - EPHA6 - Endothelial	Endothelial - EFNA2	EPHA6 - Endothelial	human
Endothelial	Endothelial	EFNA2	EPHA7	EFNA2 - EPHA7	Ephrins	0.00258325	0.00259711	-0.0515137	-0.010377	0.00183639	0.00066778	6.70897e-06	-0.0309453	Endothelial - Endothelial	Endothelial - EFNA2 - EPHA7 - Endothelial	Endothelial - EFNA2	EPHA7 - Endothelial	human
Endothelial	Endothelial	EFNA2	EPHA8	EFNA2 - EPHA8	Ephrins	0.00258325	0	-0.0515137	-0.0121927	0.00183639	0	0	-0.0318532	Endothelial - Endothelial	Endothelial - EFNA2 - EPHA8 - Endothelial	Endothelial - EFNA2	EPHA8 - Endothelial	human
Endothelial	Endothelial	EFNA3	EPHA1	EFNA3 - EPHA1	Ephrins	0.0213566	0.00609948	-0.0232497	-0.132584	0.0100167	0.00267112	0.000130264	-0.0779171	Endothelial - Endothelial	Endothelial - EFNA3 - EPHA1 - Endothelial	Endothelial - EFNA3	EPHA1 - Endothelial	human
Endothelial	Endothelial	EFNA3	EPHA2	EFNA3 - EPHA2	Ephrins	0.0213566	0.176947	-0.0232497	0.0613052	0.0100167	0.0941569	0.00377899	0.0190278	Endothelial - Endothelial	Endothelial - EFNA3 - EPHA2 - Endothelial	Endothelial - EFNA3	EPHA2 - Endothelial	human
Endothelial	Endothelial	EFNA3	EPHA3	EFNA3 - EPHA3	Ephrins	0.0213566	0	-0.0232497	-0.0156317	0.0100167	0	0	-0.0194407	Endothelial - Endothelial	Endothelial - EFNA3 - EPHA3 - Endothelial	Endothelial - EFNA3	EPHA3 - Endothelial	human
Endothelial	Endothelial	EFNA3	EPHA4	EFNA3 - EPHA4	Ephrins	0.0213566	0.266909	-0.0232497	0.184035	0.0100167	0.14207	0.00570026	0.0803927	Endothelial - Endothelial	Endothelial - EFNA3 - EPHA4 - Endothelial	Endothelial - EFNA3	EPHA4 - Endothelial	human
Endothelial	Endothelial	EFNA3	EPHA5	EFNA3 - EPHA5	Ephrins	0.0213566	0.000889708	-0.0232497	-0.014575	0.0100167	0.00100167	1.90011e-05	-0.0189123	Endothelial - Endothelial	Endothelial - EFNA3 - EPHA5 - Endothelial	Endothelial - EFNA3	EPHA5 - Endothelial	human
Endothelial	Endothelial	EFNA3	EPHA6	EFNA3 - EPHA6	Ephrins	0.0213566	0.000307402	-0.0232497	-0.0225792	0.0100167	0.000166945	6.56505e-06	-0.0229145	Endothelial - Endothelial	Endothelial - EFNA3 - EPHA6 - Endothelial	Endothelial - EFNA3	EPHA6 - Endothelial	human
Endothelial	Endothelial	EFNA3	EPHA7	EFNA3 - EPHA7	Ephrins	0.0213566	0.00259711	-0.0232497	-0.010377	0.0100167	0.00066778	5.54653e-05	-0.0168133	Endothelial - Endothelial	Endothelial - EFNA3 - EPHA7 - Endothelial	Endothelial - EFNA3	EPHA7 - Endothelial	human
Endothelial	Endothelial	EFNA3	EPHA8	EFNA3 - EPHA8	Ephrins	0.0213566	0	-0.0232497	-0.0121927	0.0100167	0	0	-0.0177212	Endothelial - Endothelial	Endothelial - EFNA3 - EPHA8 - Endothelial	Endothelial - EFNA3	EPHA8 - Endothelial	human
Endothelial	Endothelial	EFNA3	EPHB1	EFNA3 - EPHB1	Ephrins	0.0213566	0.142579	-0.0232497	0.0837379	0.0100167	0.0686144	0.00304501	0.0302441	Endothelial - Endothelial	Endothelial - EFNA3 - EPHB1 - Endothelial	Endothelial - EFNA3	EPHB1 - Endothelial	human
Endothelial	Endothelial	EFNA3	EPHB6	EFNA3 - EPHB6	Ephrins	0.0213566	0.0067644	-0.0232497	-0.0257636	0.0100167	0.0033389	0.000144464	-0.0245066	Endothelial - Endothelial	Endothelial - EFNA3 - EPHB6 - Endothelial	Endothelial - EFNA3	EPHB6 - Endothelial	human
Endothelial	Endothelial	EFNA4	EPHA1	EFNA4 - EPHA1	Ephrins	0.11185	0.00609948	-0.0231948	-0.132584	0.0621035	0.00267112	0.000682229	-0.0778897	Endothelial - Endothelial	Endothelial - EFNA4 - EPHA1 - Endothelial	Endothelial - EFNA4	EPHA1 - Endothelial	human
Endothelial	Endothelial	EFNA4	EPHA2	EFNA4 - EPHA2	Ephrins	0.11185	0.176947	-0.0231948	0.0613052	0.0621035	0.0941569	0.0197916	0.0190552	Endothelial - Endothelial	Endothelial - EFNA4 - EPHA2 - Endothelial	Endothelial - EFNA4	EPHA2 - Endothelial	human
Endothelial	Endothelial	EFNA4	EPHA3	EFNA4 - EPHA3	Ephrins	0.11185	0	-0.0231948	-0.0156317	0.0621035	0	0	-0.0194133	Endothelial - Endothelial	Endothelial - EFNA4 - EPHA3 - Endothelial	Endothelial - EFNA4	EPHA3 - Endothelial	human
Endothelial	Endothelial	EFNA4	EPHA4	EFNA4 - EPHA4	Ephrins	0.11185	0.266909	-0.0231948	0.184035	0.0621035	0.14207	0.0298539	0.0804202	Endothelial - Endothelial	Endothelial - EFNA4 - EPHA4 - Endothelial	Endothelial - EFNA4	EPHA4 - Endothelial	human
Endothelial	Endothelial	EFNA4	EPHA5	EFNA4 - EPHA5	Ephrins	0.11185	0.000889708	-0.0231948	-0.014575	0.0621035	0.00100167	9.95142e-05	-0.0188849	Endothelial - Endothelial	Endothelial - EFNA4 - EPHA5 - Endothelial	Endothelial - EFNA4	EPHA5 - Endothelial	human
Endothelial	Endothelial	EFNA4	EPHA6	EFNA4 - EPHA6	Ephrins	0.11185	0.000307402	-0.0231948	-0.0225792	0.0621035	0.000166945	3.43831e-05	-0.022887	Endothelial - Endothelial	Endothelial - EFNA4 - EPHA6 - Endothelial	Endothelial - EFNA4	EPHA6 - Endothelial	human
Endothelial	Endothelial	EFNA4	EPHA7	EFNA4 - EPHA7	Ephrins	0.11185	0.00259711	-0.0231948	-0.010377	0.0621035	0.00066778	0.000290488	-0.0167859	Endothelial - Endothelial	Endothelial - EFNA4 - EPHA7 - Endothelial	Endothelial - EFNA4	EPHA7 - Endothelial	human
Endothelial	Endothelial	EFNA4	EPHA8	EFNA4 - EPHA8	Ephrins	0.11185	0	-0.0231948	-0.0121927	0.0621035	0	0	-0.0176938	Endothelial - Endothelial	Endothelial - EFNA4 - EPHA8 - Endothelial	Endothelial - EFNA4	EPHA8 - Endothelial	human
Endothelial	Endothelial	EFNA5	EPHA1	EFNA5 - EPHA1	Ephrins	0.230387	0.00609948	0.0778133	-0.132584	0.123873	0.00267112	0.00140524	-0.0273856	Endothelial - Endothelial	Endothelial - EFNA5 - EPHA1 - Endothelial	Endothelial - EFNA5	EPHA1 - Endothelial	human
Endothelial	Endothelial	EFNA5	EPHA2	EFNA5 - EPHA2	Ephrins	0.230387	0.176947	0.0778133	0.0613052	0.123873	0.0941569	0.0407664	0.0695592	Endothelial - Endothelial	Endothelial - EFNA5 - EPHA2 - Endothelial	Endothelial - EFNA5	EPHA2 - Endothelial	human
Endothelial	Endothelial	EFNA5	EPHA3	EFNA5 - EPHA3	Ephrins	0.230387	0	0.0778133	-0.0156317	0.123873	0	0	0.0310908	Endothelial - Endothelial	Endothelial - EFNA5 - EPHA3 - Endothelial	Endothelial - EFNA5	EPHA3 - Endothelial	human
Endothelial	Endothelial	EFNA5	EPHA4	EFNA5 - EPHA4	Ephrins	0.230387	0.266909	0.0778133	0.184035	0.123873	0.14207	0.0614924	0.130924	Endothelial - Endothelial	Endothelial - EFNA5 - EPHA4 - Endothelial	Endothelial - EFNA5	EPHA4 - Endothelial	human
Endothelial	Endothelial	EFNA5	EPHA5	EFNA5 - EPHA5	Ephrins	0.230387	0.000889708	0.0778133	-0.014575	0.123873	0.00100167	0.000204977	0.0316191	Endothelial - Endothelial	Endothelial - EFNA5 - EPHA5 - Endothelial	Endothelial - EFNA5	EPHA5 - Endothelial	human
Endothelial	Endothelial	EFNA5	EPHA6	EFNA5 - EPHA6	Ephrins	0.230387	0.000307402	0.0778133	-0.0225792	0.123873	0.000166945	7.08214e-05	0.027617	Endothelial - Endothelial	Endothelial - EFNA5 - EPHA6 - Endothelial	Endothelial - EFNA5	EPHA6 - Endothelial	human
Endothelial	Endothelial	EFNA5	EPHA7	EFNA5 - EPHA7	Ephrins	0.230387	0.00259711	0.0778133	-0.010377	0.123873	0.00066778	0.00059834	0.0337182	Endothelial - Endothelial	Endothelial - EFNA5 - EPHA7 - Endothelial	Endothelial - EFNA5	EPHA7 - Endothelial	human
Endothelial	Endothelial	EFNA5	EPHA8	EFNA5 - EPHA8	Ephrins	0.230387	0	0.0778133	-0.0121927	0.123873	0	0	0.0328103	Endothelial - Endothelial	Endothelial - EFNA5 - EPHA8 - Endothelial	Endothelial - EFNA5	EPHA8 - Endothelial	human
Endothelial	Endothelial	EFNA5	EPHB1	EFNA5 - EPHB1	Ephrins	0.230387	0.142579	0.0778133	0.0837379	0.123873	0.0686144	0.0328485	0.0807756	Endothelial - Endothelial	Endothelial - EFNA5 - EPHB1 - Endothelial	Endothelial - EFNA5	EPHB1 - Endothelial	human
Endothelial	Endothelial	EFNA5	EPHB2	EFNA5 - EPHB2	Ephrins	0.230387	0.261865	0.0778133	0.103122	0.123873	0.146745	0.0603304	0.0904675	Endothelial - Endothelial	Endothelial - EFNA5 - EPHB2 - Endothelial	Endothelial - EFNA5	EPHB2 - Endothelial	human
Endothelial	Endothelial	EFNA5	EPHB6	EFNA5 - EPHB6	Ephrins	0.230387	0.0067644	0.0778133	-0.0257636	0.123873	0.0033389	0.00155843	0.0260249	Endothelial - Endothelial	Endothelial - EFNA5 - EPHB6 - Endothelial	Endothelial - EFNA5	EPHB6 - Endothelial	human
Endothelial	Endothelial	EFNB1	EPHA4	EFNB1 - EPHA4	Ephrins	0.183791	0.266909	0.153208	0.184035	0.0918197	0.14207	0.0490554	0.168621	Endothelial - Endothelial	Endothelial - EFNB1 - EPHA4 - Endothelial	Endothelial - EFNB1	EPHA4 - Endothelial	human
Endothelial	Endothelial	EFNB1	EPHA6	EFNB1 - EPHA6	Ephrins	0.183791	0.000307402	0.153208	-0.0225792	0.0918197	0.000166945	5.64976e-05	0.0653141	Endothelial - Endothelial	Endothelial - EFNB1 - EPHA6 - Endothelial	Endothelial - EFNB1	EPHA6 - Endothelial	human
Endothelial	Endothelial	EFNB1	EPHB1	EFNB1 - EPHB1	Ephrins	0.183791	0.142579	0.153208	0.0837379	0.0918197	0.0686144	0.0262048	0.118473	Endothelial - Endothelial	Endothelial - EFNB1 - EPHB1 - Endothelial	Endothelial - EFNB1	EPHB1 - Endothelial	human
Endothelial	Endothelial	EFNB1	EPHB2	EFNB1 - EPHB2	Ephrins	0.183791	0.261865	0.153208	0.103122	0.0918197	0.146745	0.0481284	0.128165	Endothelial - Endothelial	Endothelial - EFNB1 - EPHB2 - Endothelial	Endothelial - EFNB1	EPHB2 - Endothelial	human
Endothelial	Endothelial	EFNB1	EPHB3	EFNB1 - EPHB3	Ephrins	0.183791	0.00153392	0.153208	-0.107953	0.0918197	0.00100167	0.00028192	0.0226275	Endothelial - Endothelial	Endothelial - EFNB1 - EPHB3 - Endothelial	Endothelial - EFNB1	EPHB3 - Endothelial	human
Endothelial	Endothelial	EFNB1	EPHB4	EFNB1 - EPHB4	Ephrins	0.183791	0.400863	0.153208	0.184621	0.0918197	0.216027	0.073675	0.168914	Endothelial - Endothelial	Endothelial - EFNB1 - EPHB4 - Endothelial	Endothelial - EFNB1	EPHB4 - Endothelial	human
Endothelial	Endothelial	EFNB1	EPHB6	EFNB1 - EPHB6	Ephrins	0.183791	0.0067644	0.153208	-0.0257636	0.0918197	0.0033389	0.00124323	0.063722	Endothelial - Endothelial	Endothelial - EFNB1 - EPHB6 - Endothelial	Endothelial - EFNB1	EPHB6 - Endothelial	human
Endothelial	Endothelial	EFNB1	ERBB2	EFNB1 - ERBB2	Ephrins	0.183791	0.0217755	0.153208	-0.180314	0.0918197	0.00984975	0.00400213	-0.0135533	Endothelial - Endothelial	Endothelial - EFNB1 - ERBB2 - Endothelial	Endothelial - EFNB1	ERBB2 - Endothelial	human
Endothelial	Endothelial	EFNB2	EPHA3	EFNB2 - EPHA3	Ephrins	0.268698	0	-0.0181747	-0.0156317	0.119366	0	0	-0.0169032	Endothelial - Endothelial	Endothelial - EFNB2 - EPHA3 - Endothelial	Endothelial - EFNB2	EPHA3 - Endothelial	human
Endothelial	Endothelial	EFNB2	EPHA4	EFNB2 - EPHA4	Ephrins	0.268698	0.266909	-0.0181747	0.184035	0.119366	0.14207	0.071718	0.0829302	Endothelial - Endothelial	Endothelial - EFNB2 - EPHA4 - Endothelial	Endothelial - EFNB2	EPHA4 - Endothelial	human
Endothelial	Endothelial	EFNB2	EPHA6	EFNB2 - EPHA6	Ephrins	0.268698	0.000307402	-0.0181747	-0.0225792	0.119366	0.000166945	8.25984e-05	-0.020377	Endothelial - Endothelial	Endothelial - EFNB2 - EPHA6 - Endothelial	Endothelial - EFNB2	EPHA6 - Endothelial	human
Endothelial	Endothelial	EFNB2	EPHB1	EFNB2 - EPHB1	Ephrins	0.268698	0.142579	-0.0181747	0.0837379	0.119366	0.0686144	0.0383109	0.0327816	Endothelial - Endothelial	Endothelial - EFNB2 - EPHB1 - Endothelial	Endothelial - EFNB2	EPHB1 - Endothelial	human
Endothelial	Endothelial	EFNB2	EPHB2	EFNB2 - EPHB2	Ephrins	0.268698	0.261865	-0.0181747	0.103122	0.119366	0.146745	0.0703628	0.0424735	Endothelial - Endothelial	Endothelial - EFNB2 - EPHB2 - Endothelial	Endothelial - EFNB2	EPHB2 - Endothelial	human
Endothelial	Endothelial	EFNB2	EPHB3	EFNB2 - EPHB3	Ephrins	0.268698	0.00153392	-0.0181747	-0.107953	0.119366	0.00100167	0.000412161	-0.0630636	Endothelial - Endothelial	Endothelial - EFNB2 - EPHB3 - Endothelial	Endothelial - EFNB2	EPHB3 - Endothelial	human
Endothelial	Endothelial	EFNB2	EPHB4	EFNB2 - EPHB4	Ephrins	0.268698	0.400863	-0.0181747	0.184621	0.119366	0.216027	0.107711	0.083223	Endothelial - Endothelial	Endothelial - EFNB2 - EPHB4 - Endothelial	Endothelial - EFNB2	EPHB4 - Endothelial	human
Endothelial	Endothelial	EFNB2	EPHB6	EFNB2 - EPHB6	Ephrins	0.268698	0.0067644	-0.0181747	-0.0257636	0.119366	0.0033389	0.00181758	-0.0219691	Endothelial - Endothelial	Endothelial - EFNB2 - EPHB6 - Endothelial	Endothelial - EFNB2	EPHB6 - Endothelial	human
Endothelial	Endothelial	EFNB2	GRM1	EFNB2 - GRM1	Ephrins	0.268698	0.000218633	-0.0181747	-0.00740047	0.119366	0.000166945	5.87464e-05	-0.0127876	Endothelial - Endothelial	Endothelial - EFNB2 - GRM1 - Endothelial	Endothelial - EFNB2	GRM1 - Endothelial	human
Endothelial	Endothelial	EFNB2	GRM5	EFNB2 - GRM5	Ephrins	0.268698	0.00106895	-0.0181747	-0.011131	0.119366	0.000500835	0.000287226	-0.0146528	Endothelial - Endothelial	Endothelial - EFNB2 - GRM5 - Endothelial	Endothelial - EFNB2	GRM5 - Endothelial	human
Endothelial	Endothelial	EFNB2	PECAM1	EFNB2 - PECAM1	Ephrins	0.268698	2.56394	-0.0181747	0.789533	0.119366	0.918531	0.688927	0.385679	Endothelial - Endothelial	Endothelial - EFNB2 - PECAM1 - Endothelial	Endothelial - EFNB2	PECAM1 - Endothelial	human
Endothelial	Endothelial	EFNB2	RHBDL2	EFNB2 - RHBDL2	Ephrins	0.268698	0.00487745	-0.0181747	-0.172277	0.119366	0.00233723	0.00131056	-0.0952258	Endothelial - Endothelial	Endothelial - EFNB2 - RHBDL2 - Endothelial	Endothelial - EFNB2	RHBDL2 - Endothelial	human
Endothelial	Endothelial	EFNB3	EPHA4	EFNB3 - EPHA4	Ephrins	0.00144519	0.266909	-0.020594	0.184035	0.0015025	0.14207	0.000385735	0.0817206	Endothelial - Endothelial	Endothelial - EFNB3 - EPHA4 - Endothelial	Endothelial - EFNB3	EPHA4 - Endothelial	human
Endothelial	Endothelial	EFNB3	EPHB1	EFNB3 - EPHB1	Ephrins	0.00144519	0.142579	-0.020594	0.0837379	0.0015025	0.0686144	0.000206055	0.0315719	Endothelial - Endothelial	Endothelial - EFNB3 - EPHB1 - Endothelial	Endothelial - EFNB3	EPHB1 - Endothelial	human
Endothelial	Endothelial	EFNB3	EPHB2	EFNB3 - EPHB2	Ephrins	0.00144519	0.261865	-0.020594	0.103122	0.0015025	0.146745	0.000378446	0.0412638	Endothelial - Endothelial	Endothelial - EFNB3 - EPHB2 - Endothelial	Endothelial - EFNB3	EPHB2 - Endothelial	human
Endothelial	Endothelial	EFNB3	EPHB3	EFNB3 - EPHB3	Ephrins	0.00144519	0.00153392	-0.020594	-0.107953	0.0015025	0.00100167	2.21681e-06	-0.0642733	Endothelial - Endothelial	Endothelial - EFNB3 - EPHB3 - Endothelial	Endothelial - EFNB3	EPHB3 - Endothelial	human
Endothelial	Endothelial	EFNB3	EPHB4	EFNB3 - EPHB4	Ephrins	0.00144519	0.400863	-0.020594	0.184621	0.0015025	0.216027	0.000579325	0.0820133	Endothelial - Endothelial	Endothelial - EFNB3 - EPHB4 - Endothelial	Endothelial - EFNB3	EPHB4 - Endothelial	human
Endothelial	Endothelial	EFNB3	EPHB6	EFNB3 - EPHB6	Ephrins	0.00144519	0.0067644	-0.020594	-0.0257636	0.0015025	0.0033389	9.77588e-06	-0.0231788	Endothelial - Endothelial	Endothelial - EFNB3 - EPHB6 - Endothelial	Endothelial - EFNB3	EPHB6 - Endothelial	human
Endothelial	Endothelial	EFNB3	RHBDL2	EFNB3 - RHBDL2	Ephrins	0.00144519	0.00487745	-0.020594	-0.172277	0.0015025	0.00233723	7.04886e-06	-0.0964355	Endothelial - Endothelial	Endothelial - EFNB3 - RHBDL2 - Endothelial	Endothelial - EFNB3	RHBDL2 - Endothelial	human
Endothelial	Endothelial	EGFL8	NCR3	EGFL8 - NCR3	UNCAT	0.0451801	NA	0.0248583	NA	0.018197	NA	NA	NA	Endothelial - Endothelial	Endothelial - EGFL8 - NCR3 - Endothelial	Endothelial - EGFL8	NCR3 - Endothelial	human
Endothelial	Endothelial	EGF	CAV1	EGF - CAV1	EGF	0	2.87609	-0.047841	0.242337	0	0.941402	0	0.0972482	Endothelial - Endothelial	Endothelial - EGF - CAV1 - Endothelial	Endothelial - EGF	CAV1 - Endothelial	human
Endothelial	Endothelial	EGF	EGFR	EGF - EGFR	EGF	0	0.0549946	-0.047841	-0.344129	0	0.0245409	0	-0.195985	Endothelial - Endothelial	Endothelial - EGF - EGFR - Endothelial	Endothelial - EGF	EGFR - Endothelial	human
Endothelial	Endothelial	EGF	ERBB2	EGF - ERBB2	EGF	0	0.0217755	-0.047841	-0.180314	0	0.00984975	0	-0.114078	Endothelial - Endothelial	Endothelial - EGF - ERBB2 - Endothelial	Endothelial - EGF	ERBB2 - Endothelial	human
Endothelial	Endothelial	EGF	ERBB3	EGF - ERBB3	EGF	0	0.0206479	-0.047841	-0.298583	0	0.00901503	0	-0.173212	Endothelial - Endothelial	Endothelial - EGF - ERBB3 - Endothelial	Endothelial - EGF	ERBB3 - Endothelial	human
Endothelial	Endothelial	EGF	ERBB4	EGF - ERBB4	EGF	0	0.000546417	-0.047841	-0.0180449	0	0.00033389	0	-0.0329429	Endothelial - Endothelial	Endothelial - EGF - ERBB4 - Endothelial	Endothelial - EGF	ERBB4 - Endothelial	human
Endothelial	Endothelial	EGF	FSHR	EGF - FSHR	EGF	0	NA	-0.047841	NA	0	NA	NA	NA	Endothelial - Endothelial	Endothelial - EGF - FSHR - Endothelial	Endothelial - EGF	FSHR - Endothelial	human
Endothelial	Endothelial	EPGN	EGFR	EPGN - EGFR	EGF	0.00355514	0.0549946	-0.042576	-0.344129	0.00133556	0.0245409	0.000195514	-0.193353	Endothelial - Endothelial	Endothelial - EPGN - EGFR - Endothelial	Endothelial - EPGN	EGFR - Endothelial	human
Endothelial	Endothelial	EPO	EPOR	EPO - EPOR	UNCAT	0	0.137515	0	0.0964952	0	0.0639399	0	0.0482476	Endothelial - Endothelial	Endothelial - EPO - EPOR - Endothelial	Endothelial - EPO	EPOR - Endothelial	human
Endothelial	Endothelial	EREG	EGFR	EREG - EGFR	EGF	0.0673391	0.0549946	-0.322105	-0.344129	0.0228715	0.0245409	0.00370329	-0.333117	Endothelial - Endothelial	Endothelial - EREG - EGFR - Endothelial	Endothelial - EREG	EGFR - Endothelial	human
Endothelial	Endothelial	EREG	ERBB2	EREG - ERBB2	EGF	0.0673391	0.0217755	-0.322105	-0.180314	0.0228715	0.00984975	0.00146634	-0.25121	Endothelial - Endothelial	Endothelial - EREG - ERBB2 - Endothelial	Endothelial - EREG	ERBB2 - Endothelial	human
Endothelial	Endothelial	EREG	ERBB3	EREG - ERBB3	EGF	0.0673391	0.0206479	-0.322105	-0.298583	0.0228715	0.00901503	0.00139041	-0.310344	Endothelial - Endothelial	Endothelial - EREG - ERBB3 - Endothelial	Endothelial - EREG	ERBB3 - Endothelial	human
Endothelial	Endothelial	EREG	ERBB4	EREG - ERBB4	EGF	0.0673391	0.000546417	-0.322105	-0.0180449	0.0228715	0.00033389	3.67952e-05	-0.170075	Endothelial - Endothelial	Endothelial - EREG - ERBB4 - Endothelial	Endothelial - EREG	ERBB4 - Endothelial	human
Endothelial	Endothelial	F10	F3	F10 - F3	UNCAT	0.0034348	0.0890901	-0.0538931	-0.250828	0.00200334	0.030384	0.000306006	-0.152361	Endothelial - Endothelial	Endothelial - F10 - F3 - Endothelial	Endothelial - F10	F3 - Endothelial	human
Endothelial	Endothelial	F10	ITGAM	F10 - ITGAM	UNCAT	0.0034348	0.000220423	-0.0538931	-0.0131065	0.00200334	0.000166945	7.57109e-07	-0.0334998	Endothelial - Endothelial	Endothelial - F10 - ITGAM - Endothelial	Endothelial - F10	ITGAM - Endothelial	human
Endothelial	Endothelial	F10	ITGB2	F10 - ITGB2	UNCAT	0.0034348	0.0111766	-0.0538931	-0.176937	0.00200334	0.00417362	3.83892e-05	-0.115415	Endothelial - Endothelial	Endothelial - F10 - ITGB2 - Endothelial	Endothelial - F10	ITGB2 - Endothelial	human
Endothelial	Endothelial	F11	GP1BA	F11 - GP1BA	UNCAT	NA	0.00191707	NA	-0.00740047	NA	0.000166945	NA	NA	Endothelial - Endothelial	Endothelial - F11 - GP1BA - Endothelial	Endothelial - F11	GP1BA - Endothelial	human
Endothelial	Endothelial	F12	CD93	F12 - CD93	UNCAT	0.0259946	1.85847	-0.182461	0.66672	0.0125209	0.782638	0.0483102	0.242129	Endothelial - Endothelial	Endothelial - F12 - CD93 - Endothelial	Endothelial - F12	CD93 - Endothelial	human
Endothelial	Endothelial	F12	GP1BA	F12 - GP1BA	UNCAT	0.0259946	0.00191707	-0.182461	-0.00740047	0.0125209	0.000166945	4.98334e-05	-0.0949309	Endothelial - Endothelial	Endothelial - F12 - GP1BA - Endothelial	Endothelial - F12	GP1BA - Endothelial	human
Endothelial	Endothelial	F13A1	ITGA4	F13A1 - ITGA4	UNCAT	0.000402289	0.0256639	-0.0193166	-0.205822	0.00033389	0.00784641	1.03243e-05	-0.112569	Endothelial - Endothelial	Endothelial - F13A1 - ITGA4 - Endothelial	Endothelial - F13A1	ITGA4 - Endothelial	human
Endothelial	Endothelial	F13A1	ITGA9	F13A1 - ITGA9	UNCAT	0.000402289	0.00274637	-0.0193166	-0.0156075	0.00033389	0.00116861	1.10484e-06	-0.017462	Endothelial - Endothelial	Endothelial - F13A1 - ITGA9 - Endothelial	Endothelial - F13A1	ITGA9 - Endothelial	human
Endothelial	Endothelial	F13A1	ITGB1	F13A1 - ITGB1	UNCAT	0.000402289	2.24898	-0.0193166	0.131115	0.00033389	0.894825	0.000904741	0.0558991	Endothelial - Endothelial	Endothelial - F13A1 - ITGB1 - Endothelial	Endothelial - F13A1	ITGB1 - Endothelial	human
Endothelial	Endothelial	F2	F2R	F2 - F2R	Vasoactive	NA	1.13269	NA	0.301268	NA	0.551586	NA	NA	Endothelial - Endothelial	Endothelial - F2 - F2R - Endothelial	Endothelial - F2	F2R - Endothelial	human
Endothelial	Endothelial	F2	F2RL1	F2 - F2RL1	Vasoactive	NA	0.0906608	NA	0.0295433	NA	0.0512521	NA	NA	Endothelial - Endothelial	Endothelial - F2 - F2RL1 - Endothelial	Endothelial - F2	F2RL1 - Endothelial	human
Endothelial	Endothelial	F2	F2RL2	F2 - F2RL2	Vasoactive	NA	0.0346201	NA	0.0437745	NA	0.0202003	NA	NA	Endothelial - Endothelial	Endothelial - F2 - F2RL2 - Endothelial	Endothelial - F2	F2RL2 - Endothelial	human
Endothelial	Endothelial	F2	F2RL3	F2 - F2RL3	Vasoactive	NA	0.375228	NA	0.214128	NA	0.150751	NA	NA	Endothelial - Endothelial	Endothelial - F2 - F2RL3 - Endothelial	Endothelial - F2	F2RL3 - Endothelial	human
Endothelial	Endothelial	F2	GP1BA	F2 - GP1BA	Vasoactive	NA	0.00191707	NA	-0.00740047	NA	0.000166945	NA	NA	Endothelial - Endothelial	Endothelial - F2 - GP1BA - Endothelial	Endothelial - F2	GP1BA - Endothelial	human
Endothelial	Endothelial	F2	GP1BB	F2 - GP1BB	Vasoactive	NA	0.0197655	NA	-0.0158109	NA	0.00884808	NA	NA	Endothelial - Endothelial	Endothelial - F2 - GP1BB - Endothelial	Endothelial - F2	GP1BB - Endothelial	human
Endothelial	Endothelial	F2	GP9	F2 - GP9	Vasoactive	NA	NA	NA	NA	NA	NA	NA	NA	Endothelial - Endothelial	Endothelial - F2 - GP9 - Endothelial	Endothelial - F2	GP9 - Endothelial	human
Endothelial	Endothelial	F2	ITGA2B	F2 - ITGA2B	Vasoactive	NA	0.00360779	NA	-0.0143037	NA	0.00133556	NA	NA	Endothelial - Endothelial	Endothelial - F2 - ITGA2B - Endothelial	Endothelial - F2	ITGA2B - Endothelial	human
Endothelial	Endothelial	F2	THBD	F2 - THBD	Vasoactive	NA	0.355538	NA	0.23355	NA	0.152588	NA	NA	Endothelial - Endothelial	Endothelial - F2 - THBD - Endothelial	Endothelial - F2	THBD - Endothelial	human
Endothelial	Endothelial	F7	F3	F7 - F3	Vasoactive	0	0.0890901	-0.0152146	-0.250828	0	0.030384	0	-0.133021	Endothelial - Endothelial	Endothelial - F7 - F3 - Endothelial	Endothelial - F7	F3 - Endothelial	human
Endothelial	Endothelial	F8	ASGR2	F8 - ASGR2	Vasoactive	0.00960764	0	-0.0450749	-0.0127811	0.00417362	0	0	-0.028928	Endothelial - Endothelial	Endothelial - F8 - ASGR2 - Endothelial	Endothelial - F8	ASGR2 - Endothelial	human
Endothelial	Endothelial	F8	LDLR	F8 - LDLR	Vasoactive	0.00960764	0.145198	-0.0450749	-0.187777	0.00417362	0.0732888	0.00139501	-0.116426	Endothelial - Endothelial	Endothelial - F8 - LDLR - Endothelial	Endothelial - F8	LDLR - Endothelial	human
Endothelial	Endothelial	F8	LRP1	F8 - LRP1	Vasoactive	0.00960764	0.0314119	-0.0450749	-0.211875	0.00417362	0.0130217	0.000301795	-0.128475	Endothelial - Endothelial	Endothelial - F8 - LRP1 - Endothelial	Endothelial - F8	LRP1 - Endothelial	human
Endothelial	Endothelial	F9	LRP1	F9 - LRP1	UNCAT	NA	0.0314119	NA	-0.211875	NA	0.0130217	NA	NA	Endothelial - Endothelial	Endothelial - F9 - LRP1 - Endothelial	Endothelial - F9	LRP1 - Endothelial	human
Endothelial	Endothelial	FARP2	PLXNA1	FARP2 - PLXNA1	UNCAT	0.0916545	0.0646028	-0.0389269	-0.0711114	0.0464107	0.0312187	0.00592113	-0.0550192	Endothelial - Endothelial	Endothelial - FARP2 - PLXNA1 - Endothelial	Endothelial - FARP2	PLXNA1 - Endothelial	human
Endothelial	Endothelial	FARP2	PLXNA2	FARP2 - PLXNA2	UNCAT	0.0916545	0.361412	-0.0389269	0.177714	0.0464107	0.201169	0.033125	0.0693937	Endothelial - Endothelial	Endothelial - FARP2 - PLXNA2 - Endothelial	Endothelial - FARP2	PLXNA2 - Endothelial	human
Endothelial	Endothelial	FARP2	PLXNA3	FARP2 - PLXNA3	UNCAT	0.0916545	0.123179	-0.0389269	-0.0427695	0.0464107	0.0604341	0.0112899	-0.0408482	Endothelial - Endothelial	Endothelial - FARP2 - PLXNA3 - Endothelial	Endothelial - FARP2	PLXNA3 - Endothelial	human
Endothelial	Endothelial	FARP2	PLXNA4	FARP2 - PLXNA4	UNCAT	0.0916545	0.0163999	-0.0389269	0.0276729	0.0464107	0.0111853	0.00150312	-0.00562702	Endothelial - Endothelial	Endothelial - FARP2 - PLXNA4 - Endothelial	Endothelial - FARP2	PLXNA4 - Endothelial	human
Endothelial	Endothelial	FASLG	FAS	FASLG - FAS	TNF	NA	0.0570383	NA	-0.197751	NA	0.0293823	NA	NA	Endothelial - Endothelial	Endothelial - FASLG - FAS - Endothelial	Endothelial - FASLG	FAS - Endothelial	human
Endothelial	Endothelial	FASLG	TNFRSF1A	FASLG - TNFRSF1A	TNF	NA	0.510654	NA	-0.0266983	NA	0.267446	NA	NA	Endothelial - Endothelial	Endothelial - FASLG - TNFRSF1A - Endothelial	Endothelial - FASLG	TNFRSF1A - Endothelial	human
Endothelial	Endothelial	FASLG	TNFRSF6B	FASLG - TNFRSF6B	TNF	NA	0.129669	NA	-0.105143	NA	0.0716194	NA	NA	Endothelial - Endothelial	Endothelial - FASLG - TNFRSF6B - Endothelial	Endothelial - FASLG	TNFRSF6B - Endothelial	human
Endothelial	Endothelial	FAT4	DCHS1	FAT4 - DCHS1	UNCAT	0.383531	0.34781	0.25781	0.246426	0.189149	0.176628	0.133396	0.252118	Endothelial - Endothelial	Endothelial - FAT4 - DCHS1 - Endothelial	Endothelial - FAT4	DCHS1 - Endothelial	human
Endothelial	Endothelial	FBLN1	ITGB1	FBLN1 - ITGB1	UNCAT	0.0270042	2.24898	-0.186543	0.131115	0.00984975	0.894825	0.0607321	-0.0277142	Endothelial - Endothelial	Endothelial - FBLN1 - ITGB1 - Endothelial	Endothelial - FBLN1	ITGB1 - Endothelial	human
Endothelial	Endothelial	FBLN2	ITGB3	FBLN2 - ITGB3	UNCAT	0.00741974	0.0218954	-0.030231	-0.0518058	0.00283806	0.0135225	0.000162458	-0.0410184	Endothelial - Endothelial	Endothelial - FBLN2 - ITGB3 - Endothelial	Endothelial - FBLN2	ITGB3 - Endothelial	human
Endothelial	Endothelial	FBN1	ITGA5	FBN1 - ITGA5	UNCAT	0.944326	1.13311	0.117056	0.244101	0.47212	0.556928	1.07002	0.180578	Endothelial - Endothelial	Endothelial - FBN1 - ITGA5 - Endothelial	Endothelial - FBN1	ITGA5 - Endothelial	human
Endothelial	Endothelial	FBN1	ITGAV	FBN1 - ITGAV	UNCAT	0.944326	0.857661	0.117056	0.117173	0.47212	0.425543	0.809911	0.117114	Endothelial - Endothelial	Endothelial - FBN1 - ITGAV - Endothelial	Endothelial - FBN1	ITGAV - Endothelial	human
Endothelial	Endothelial	FBN1	ITGB1	FBN1 - ITGB1	UNCAT	0.944326	2.24898	0.117056	0.131115	0.47212	0.894825	2.12377	0.124085	Endothelial - Endothelial	Endothelial - FBN1 - ITGB1 - Endothelial	Endothelial - FBN1	ITGB1 - Endothelial	human
Endothelial	Endothelial	FBN1	ITGB3	FBN1 - ITGB3	UNCAT	0.944326	0.0218954	0.117056	-0.0518058	0.47212	0.0135225	0.0206764	0.032625	Endothelial - Endothelial	Endothelial - FBN1 - ITGB3 - Endothelial	Endothelial - FBN1	ITGB3 - Endothelial	human
Endothelial	Endothelial	FBN1	ITGB6	FBN1 - ITGB6	UNCAT	0.944326	0.0138409	0.117056	-0.155946	0.47212	0.0066778	0.0130703	-0.0194452	Endothelial - Endothelial	Endothelial - FBN1 - ITGB6 - Endothelial	Endothelial - FBN1	ITGB6 - Endothelial	human
Endothelial	Endothelial	FCN2	LRP1	FCN2 - LRP1	UNCAT	NA	0.0314119	NA	-0.211875	NA	0.0130217	NA	NA	Endothelial - Endothelial	Endothelial - FCN2 - LRP1 - Endothelial	Endothelial - FCN2	LRP1 - Endothelial	human
Endothelial	Endothelial	FGA	CDH5	FGA - CDH5	Cell-cell adhesion	0	1.58507	0	0.635342	0	0.735392	0	0.317671	Endothelial - Endothelial	Endothelial - FGA - CDH5 - Endothelial	Endothelial - FGA	CDH5 - Endothelial	human
Endothelial	Endothelial	FGA	ITGA2B	FGA - ITGA2B	UNCAT	0	0.00360779	0	-0.0143037	0	0.00133556	0	-0.00715184	Endothelial - Endothelial	Endothelial - FGA - ITGA2B - Endothelial	Endothelial - FGA	ITGA2B - Endothelial	human
Endothelial	Endothelial	FGA	ITGA5	FGA - ITGA5	UNCAT	0	1.13311	0	0.244101	0	0.556928	0	0.12205	Endothelial - Endothelial	Endothelial - FGA - ITGA5 - Endothelial	Endothelial - FGA	ITGA5 - Endothelial	human
Endothelial	Endothelial	FGA	ITGAD	FGA - ITGAD	UNCAT	0	NA	0	NA	0	NA	NA	NA	Endothelial - Endothelial	Endothelial - FGA - ITGAD - Endothelial	Endothelial - FGA	ITGAD - Endothelial	human
Endothelial	Endothelial	FGA	ITGAM	FGA - ITGAM	UNCAT	0	0.000220423	0	-0.0131065	0	0.000166945	0	-0.00655325	Endothelial - Endothelial	Endothelial - FGA - ITGAM - Endothelial	Endothelial - FGA	ITGAM - Endothelial	human
Endothelial	Endothelial	FGA	ITGAV	FGA - ITGAV	UNCAT	0	0.857661	0	0.117173	0	0.425543	0	0.0585863	Endothelial - Endothelial	Endothelial - FGA - ITGAV - Endothelial	Endothelial - FGA	ITGAV - Endothelial	human
Endothelial	Endothelial	FGA	ITGAX	FGA - ITGAX	UNCAT	0	0.000644465	0	-0.0102294	0	0.00033389	0	-0.0051147	Endothelial - Endothelial	Endothelial - FGA - ITGAX - Endothelial	Endothelial - FGA	ITGAX - Endothelial	human
Endothelial	Endothelial	FGA	ITGB1	FGA - ITGB1	UNCAT	0	2.24898	0	0.131115	0	0.894825	0	0.0655574	Endothelial - Endothelial	Endothelial - FGA - ITGB1 - Endothelial	Endothelial - FGA	ITGB1 - Endothelial	human
Endothelial	Endothelial	FGA	ITGB2	FGA - ITGB2	UNCAT	0	0.0111766	0	-0.176937	0	0.00417362	0	-0.0884683	Endothelial - Endothelial	Endothelial - FGA - ITGB2 - Endothelial	Endothelial - FGA	ITGB2 - Endothelial	human
Endothelial	Endothelial	FGA	ITGB3	FGA - ITGB3	UNCAT	0	0.0218954	0	-0.0518058	0	0.0135225	0	-0.0259029	Endothelial - Endothelial	Endothelial - FGA - ITGB3 - Endothelial	Endothelial - FGA	ITGB3 - Endothelial	human
Endothelial	Endothelial	FGA	PLAUR	FGA - PLAUR	UNCAT	0	0.317464	0	-0.206125	0	0.155593	0	-0.103063	Endothelial - Endothelial	Endothelial - FGA - PLAUR - Endothelial	Endothelial - FGA	PLAUR - Endothelial	human
Endothelial	Endothelial	FGB	ITGA2B	FGB - ITGA2B	UNCAT	0.00026871	0.00360779	-0.0101952	-0.0143037	0.000166945	0.00133556	9.69449e-07	-0.0122495	Endothelial - Endothelial	Endothelial - FGB - ITGA2B - Endothelial	Endothelial - FGB	ITGA2B - Endothelial	human
Endothelial	Endothelial	FGB	ITGA5	FGB - ITGA5	UNCAT	0.00026871	1.13311	-0.0101952	0.244101	0.000166945	0.556928	0.000304477	0.116953	Endothelial - Endothelial	Endothelial - FGB - ITGA5 - Endothelial	Endothelial - FGB	ITGA5 - Endothelial	human
Endothelial	Endothelial	FGB	ITGAM	FGB - ITGAM	UNCAT	0.00026871	0.000220423	-0.0101952	-0.0131065	0.000166945	0.000166945	5.92299e-08	-0.0116509	Endothelial - Endothelial	Endothelial - FGB - ITGAM - Endothelial	Endothelial - FGB	ITGAM - Endothelial	human
Endothelial	Endothelial	FGB	ITGAV	FGB - ITGAV	UNCAT	0.00026871	0.857661	-0.0101952	0.117173	0.000166945	0.425543	0.000230462	0.0534887	Endothelial - Endothelial	Endothelial - FGB - ITGAV - Endothelial	Endothelial - FGB	ITGAV - Endothelial	human
Endothelial	Endothelial	FGB	ITGB1	FGB - ITGB1	UNCAT	0.00026871	2.24898	-0.0101952	0.131115	0.000166945	0.894825	0.000604324	0.0604598	Endothelial - Endothelial	Endothelial - FGB - ITGB1 - Endothelial	Endothelial - FGB	ITGB1 - Endothelial	human
Endothelial	Endothelial	FGB	ITGB2	FGB - ITGB2	UNCAT	0.00026871	0.0111766	-0.0101952	-0.176937	0.000166945	0.00417362	3.00325e-06	-0.0935659	Endothelial - Endothelial	Endothelial - FGB - ITGB2 - Endothelial	Endothelial - FGB	ITGB2 - Endothelial	human
Endothelial	Endothelial	FGF10	FGFR1	FGF10 - FGFR1	FGF	NA	0.616358	NA	0.198752	NA	0.319199	NA	NA	Endothelial - Endothelial	Endothelial - FGF10 - FGFR1 - Endothelial	Endothelial - FGF10	FGFR1 - Endothelial	human
Endothelial	Endothelial	FGF10	FGFR2	FGF10 - FGFR2	FGF	NA	0	NA	-0.0193736	NA	0	NA	NA	Endothelial - Endothelial	Endothelial - FGF10 - FGFR2 - Endothelial	Endothelial - FGF10	FGFR2 - Endothelial	human
Endothelial	Endothelial	FGF10	FGFR3	FGF10 - FGFR3	FGF	NA	0.00429041	NA	-0.0158444	NA	0.00233723	NA	NA	Endothelial - Endothelial	Endothelial - FGF10 - FGFR3 - Endothelial	Endothelial - FGF10	FGFR3 - Endothelial	human
Endothelial	Endothelial	FGF10	FGFR4	FGF10 - FGFR4	FGF	NA	0.003471	NA	-0.0432188	NA	0.00100167	NA	NA	Endothelial - Endothelial	Endothelial - FGF10 - FGFR4 - Endothelial	Endothelial - FGF10	FGFR4 - Endothelial	human
Endothelial	Endothelial	FGF11	FGFR1	FGF11 - FGFR1	FGF	0.00403995	0.616358	-0.0311069	0.198752	0.00183639	0.319199	0.00249005	0.0838226	Endothelial - Endothelial	Endothelial - FGF11 - FGFR1 - Endothelial	Endothelial - FGF11	FGFR1 - Endothelial	human
Endothelial	Endothelial	FGF11	FGFR2	FGF11 - FGFR2	FGF	0.00403995	0	-0.0311069	-0.0193736	0.00183639	0	0	-0.0252402	Endothelial - Endothelial	Endothelial - FGF11 - FGFR2 - Endothelial	Endothelial - FGF11	FGFR2 - Endothelial	human
Endothelial	Endothelial	FGF11	FGFR3	FGF11 - FGFR3	FGF	0.00403995	0.00429041	-0.0311069	-0.0158444	0.00183639	0.00233723	1.7333e-05	-0.0234756	Endothelial - Endothelial	Endothelial - FGF11 - FGFR3 - Endothelial	Endothelial - FGF11	FGFR3 - Endothelial	human
Endothelial	Endothelial	FGF11	FGFR4	FGF11 - FGFR4	FGF	0.00403995	0.003471	-0.0311069	-0.0432188	0.00183639	0.00100167	1.40227e-05	-0.0371628	Endothelial - Endothelial	Endothelial - FGF11 - FGFR4 - Endothelial	Endothelial - FGF11	FGFR4 - Endothelial	human
Endothelial	Endothelial	FGF12	FGFR1	FGF12 - FGFR1	FGF	0.0137863	0.616358	0.00864891	0.198752	0.00717863	0.319199	0.00849728	0.1037	Endothelial - Endothelial	Endothelial - FGF12 - FGFR1 - Endothelial	Endothelial - FGF12	FGFR1 - Endothelial	human
Endothelial	Endothelial	FGF12	FGFR2	FGF12 - FGFR2	FGF	0.0137863	0	0.00864891	-0.0193736	0.00717863	0	0	-0.00536233	Endothelial - Endothelial	Endothelial - FGF12 - FGFR2 - Endothelial	Endothelial - FGF12	FGFR2 - Endothelial	human
Endothelial	Endothelial	FGF12	FGFR3	FGF12 - FGFR3	FGF	0.0137863	0.00429041	0.00864891	-0.0158444	0.00717863	0.00233723	5.91488e-05	-0.00359773	Endothelial - Endothelial	Endothelial - FGF12 - FGFR3 - Endothelial	Endothelial - FGF12	FGFR3 - Endothelial	human
Endothelial	Endothelial	FGF12	FGFR4	FGF12 - FGFR4	FGF	0.0137863	0.003471	0.00864891	-0.0432188	0.00717863	0.00100167	4.78521e-05	-0.017285	Endothelial - Endothelial	Endothelial - FGF12 - FGFR4 - Endothelial	Endothelial - FGF12	FGFR4 - Endothelial	human
Endothelial	Endothelial	FGF13	EGFR	FGF13 - EGFR	EGF	0.000552642	0.0549946	-0.0122314	-0.344129	0.00033389	0.0245409	3.03924e-05	-0.17818	Endothelial - Endothelial	Endothelial - FGF13 - EGFR - Endothelial	Endothelial - FGF13	EGFR - Endothelial	human
Endothelial	Endothelial	FGF13	FGFR1	FGF13 - FGFR1	FGF	0.000552642	0.616358	-0.0122314	0.198752	0.00033389	0.319199	0.000340625	0.0932603	Endothelial - Endothelial	Endothelial - FGF13 - FGFR1 - Endothelial	Endothelial - FGF13	FGFR1 - Endothelial	human
Endothelial	Endothelial	FGF13	FGFR2	FGF13 - FGFR2	FGF	0.000552642	0	-0.0122314	-0.0193736	0.00033389	0	0	-0.0158025	Endothelial - Endothelial	Endothelial - FGF13 - FGFR2 - Endothelial	Endothelial - FGF13	FGFR2 - Endothelial	human
Endothelial	Endothelial	FGF13	FGFR3	FGF13 - FGFR3	FGF	0.000552642	0.00429041	-0.0122314	-0.0158444	0.00033389	0.00233723	2.37106e-06	-0.0140379	Endothelial - Endothelial	Endothelial - FGF13 - FGFR3 - Endothelial	Endothelial - FGF13	FGFR3 - Endothelial	human
Endothelial	Endothelial	FGF13	FGFR4	FGF13 - FGFR4	FGF	0.000552642	0.003471	-0.0122314	-0.0432188	0.00033389	0.00100167	1.91822e-06	-0.0277251	Endothelial - Endothelial	Endothelial - FGF13 - FGFR4 - Endothelial	Endothelial - FGF13	FGFR4 - Endothelial	human
Endothelial	Endothelial	FGF13	SCN5A	FGF13 - SCN5A	FGF	0.000552642	0.0188703	-0.0122314	0.0186912	0.00033389	0.0110184	1.04285e-05	0.00322988	Endothelial - Endothelial	Endothelial - FGF13 - SCN5A - Endothelial	Endothelial - FGF13	SCN5A - Endothelial	human
Endothelial	Endothelial	FGF13	SCN8A	FGF13 - SCN8A	FGF	0.000552642	0.0395275	-0.0122314	0.0157627	0.00033389	0.0207012	2.18446e-05	0.00176564	Endothelial - Endothelial	Endothelial - FGF13 - SCN8A - Endothelial	Endothelial - FGF13	SCN8A - Endothelial	human
Endothelial	Endothelial	FGF14	FGFR1	FGF14 - FGFR1	FGF	0.00204352	0.616358	-0.0372513	0.198752	0.00033389	0.319199	0.00125954	0.0807503	Endothelial - Endothelial	Endothelial - FGF14 - FGFR1 - Endothelial	Endothelial - FGF14	FGFR1 - Endothelial	human
Endothelial	Endothelial	FGF14	FGFR2	FGF14 - FGFR2	FGF	0.00204352	0	-0.0372513	-0.0193736	0.00033389	0	0	-0.0283125	Endothelial - Endothelial	Endothelial - FGF14 - FGFR2 - Endothelial	Endothelial - FGF14	FGFR2 - Endothelial	human
Endothelial	Endothelial	FGF14	FGFR3	FGF14 - FGFR3	FGF	0.00204352	0.00429041	-0.0372513	-0.0158444	0.00033389	0.00233723	8.76753e-06	-0.0265479	Endothelial - Endothelial	Endothelial - FGF14 - FGFR3 - Endothelial	Endothelial - FGF14	FGFR3 - Endothelial	human
Endothelial	Endothelial	FGF14	FGFR4	FGF14 - FGFR4	FGF	0.00204352	0.003471	-0.0372513	-0.0432188	0.00033389	0.00100167	7.09305e-06	-0.0402351	Endothelial - Endothelial	Endothelial - FGF14 - FGFR4 - Endothelial	Endothelial - FGF14	FGFR4 - Endothelial	human
Endothelial	Endothelial	FGF16	FGFR1	FGF16 - FGFR1	FGF	0.0213707	0.616358	0.0308034	0.198752	0.01202	0.319199	0.013172	0.114778	Endothelial - Endothelial	Endothelial - FGF16 - FGFR1 - Endothelial	Endothelial - FGF16	FGFR1 - Endothelial	human
Endothelial	Endothelial	FGF16	FGFR2	FGF16 - FGFR2	FGF	0.0213707	0	0.0308034	-0.0193736	0.01202	0	0	0.00571493	Endothelial - Endothelial	Endothelial - FGF16 - FGFR2 - Endothelial	Endothelial - FGF16	FGFR2 - Endothelial	human
Endothelial	Endothelial	FGF16	FGFR3	FGF16 - FGFR3	FGF	0.0213707	0.00429041	0.0308034	-0.0158444	0.01202	0.00233723	9.16891e-05	0.00747954	Endothelial - Endothelial	Endothelial - FGF16 - FGFR3 - Endothelial	Endothelial - FGF16	FGFR3 - Endothelial	human
Endothelial	Endothelial	FGF16	FGFR4	FGF16 - FGFR4	FGF	0.0213707	0.003471	0.0308034	-0.0432188	0.01202	0.00100167	7.41777e-05	-0.00620769	Endothelial - Endothelial	Endothelial - FGF16 - FGFR4 - Endothelial	Endothelial - FGF16	FGFR4 - Endothelial	human
Endothelial	Endothelial	FGF17	FGFR1	FGF17 - FGFR1	FGF	NA	0.616358	NA	0.198752	NA	0.319199	NA	NA	Endothelial - Endothelial	Endothelial - FGF17 - FGFR1 - Endothelial	Endothelial - FGF17	FGFR1 - Endothelial	human
Endothelial	Endothelial	FGF17	FGFR2	FGF17 - FGFR2	FGF	NA	0	NA	-0.0193736	NA	0	NA	NA	Endothelial - Endothelial	Endothelial - FGF17 - FGFR2 - Endothelial	Endothelial - FGF17	FGFR2 - Endothelial	human
Endothelial	Endothelial	FGF17	FGFR3	FGF17 - FGFR3	FGF	NA	0.00429041	NA	-0.0158444	NA	0.00233723	NA	NA	Endothelial - Endothelial	Endothelial - FGF17 - FGFR3 - Endothelial	Endothelial - FGF17	FGFR3 - Endothelial	human
Endothelial	Endothelial	FGF17	FGFR4	FGF17 - FGFR4	FGF	NA	0.003471	NA	-0.0432188	NA	0.00100167	NA	NA	Endothelial - Endothelial	Endothelial - FGF17 - FGFR4 - Endothelial	Endothelial - FGF17	FGFR4 - Endothelial	human
Endothelial	Endothelial	FGF18	FGFR1	FGF18 - FGFR1	FGF	0.00172755	0.616358	-0.0307819	0.198752	0.000834725	0.319199	0.00106479	0.083985	Endothelial - Endothelial	Endothelial - FGF18 - FGFR1 - Endothelial	Endothelial - FGF18	FGFR1 - Endothelial	human
Endothelial	Endothelial	FGF18	FGFR2	FGF18 - FGFR2	FGF	0.00172755	0	-0.0307819	-0.0193736	0.000834725	0	0	-0.0250778	Endothelial - Endothelial	Endothelial - FGF18 - FGFR2 - Endothelial	Endothelial - FGF18	FGFR2 - Endothelial	human
Endothelial	Endothelial	FGF18	FGFR3	FGF18 - FGFR3	FGF	0.00172755	0.00429041	-0.0307819	-0.0158444	0.000834725	0.00233723	7.41189e-06	-0.0233132	Endothelial - Endothelial	Endothelial - FGF18 - FGFR3 - Endothelial	Endothelial - FGF18	FGFR3 - Endothelial	human
Endothelial	Endothelial	FGF18	FGFR4	FGF18 - FGFR4	FGF	0.00172755	0.003471	-0.0307819	-0.0432188	0.000834725	0.00100167	5.99632e-06	-0.0370004	Endothelial - Endothelial	Endothelial - FGF18 - FGFR4 - Endothelial	Endothelial - FGF18	FGFR4 - Endothelial	human
Endothelial	Endothelial	FGF19	FGFR1	FGF19 - FGFR1	FGF	0	0.616358	0	0.198752	0	0.319199	0	0.099376	Endothelial - Endothelial	Endothelial - FGF19 - FGFR1 - Endothelial	Endothelial - FGF19	FGFR1 - Endothelial	human
Endothelial	Endothelial	FGF19	FGFR2	FGF19 - FGFR2	FGF	0	0	0	-0.0193736	0	0	0	-0.00968679	Endothelial - Endothelial	Endothelial - FGF19 - FGFR2 - Endothelial	Endothelial - FGF19	FGFR2 - Endothelial	human
Endothelial	Endothelial	FGF19	FGFR3	FGF19 - FGFR3	FGF	0	0.00429041	0	-0.0158444	0	0.00233723	0	-0.00792218	Endothelial - Endothelial	Endothelial - FGF19 - FGFR3 - Endothelial	Endothelial - FGF19	FGFR3 - Endothelial	human
Endothelial	Endothelial	FGF19	FGFR4	FGF19 - FGFR4	FGF	0	0.003471	0	-0.0432188	0	0.00100167	0	-0.0216094	Endothelial - Endothelial	Endothelial - FGF19 - FGFR4 - Endothelial	Endothelial - FGF19	FGFR4 - Endothelial	human
Endothelial	Endothelial	FGF19	KLB	FGF19 - KLB	FGF	0	0.00613425	0	-0.016362	0	0.00183639	0	-0.00818101	Endothelial - Endothelial	Endothelial - FGF19 - KLB - Endothelial	Endothelial - FGF19	KLB - Endothelial	human
Endothelial	Endothelial	FGF1	CD44	FGF1 - CD44	FGF	0.0133699	0.205523	-0.183679	-0.300826	0.00550918	0.100167	0.00274783	-0.242252	Endothelial - Endothelial	Endothelial - FGF1 - CD44 - Endothelial	Endothelial - FGF1	CD44 - Endothelial	human
Endothelial	Endothelial	FGF1	EGFR	FGF1 - EGFR	EGF	0.0133699	0.0549946	-0.183679	-0.344129	0.00550918	0.0245409	0.000735273	-0.263904	Endothelial - Endothelial	Endothelial - FGF1 - EGFR - Endothelial	Endothelial - FGF1	EGFR - Endothelial	human
Endothelial	Endothelial	FGF1	FGFR1	FGF1 - FGFR1	FGF	0.0133699	0.616358	-0.183679	0.198752	0.00550918	0.319199	0.00824065	0.00753672	Endothelial - Endothelial	Endothelial - FGF1 - FGFR1 - Endothelial	Endothelial - FGF1	FGFR1 - Endothelial	human
Endothelial	Endothelial	FGF1	FGFR2	FGF1 - FGFR2	FGF	0.0133699	0	-0.183679	-0.0193736	0.00550918	0	0	-0.101526	Endothelial - Endothelial	Endothelial - FGF1 - FGFR2 - Endothelial	Endothelial - FGF1	FGFR2 - Endothelial	human
Endothelial	Endothelial	FGF1	FGFR3	FGF1 - FGFR3	FGF	0.0133699	0.00429041	-0.183679	-0.0158444	0.00550918	0.00233723	5.73624e-05	-0.0997615	Endothelial - Endothelial	Endothelial - FGF1 - FGFR3 - Endothelial	Endothelial - FGF1	FGFR3 - Endothelial	human
Endothelial	Endothelial	FGF1	FGFR4	FGF1 - FGFR4	FGF	0.0133699	0.003471	-0.183679	-0.0432188	0.00550918	0.00100167	4.64069e-05	-0.113449	Endothelial - Endothelial	Endothelial - FGF1 - FGFR4 - Endothelial	Endothelial - FGF1	FGFR4 - Endothelial	human
Endothelial	Endothelial	FGF1	FGFRL1	FGF1 - FGFRL1	FGF	0.0133699	0.030921	-0.183679	-0.0930846	0.00550918	0.0166945	0.000413411	-0.138382	Endothelial - Endothelial	Endothelial - FGF1 - FGFRL1 - Endothelial	Endothelial - FGF1	FGFRL1 - Endothelial	human
Endothelial	Endothelial	FGF1	NRP1	FGF1 - NRP1	FGF	0.0133699	1.11122	-0.183679	0.265715	0.00550918	0.539566	0.0148569	0.0410184	Endothelial - Endothelial	Endothelial - FGF1 - NRP1 - Endothelial	Endothelial - FGF1	NRP1 - Endothelial	human
Endothelial	Endothelial	FGF20	FGFR4	FGF20 - FGFR4	FGF	0	0.003471	-0.0199093	-0.0432188	0	0.00100167	0	-0.0315641	Endothelial - Endothelial	Endothelial - FGF20 - FGFR4 - Endothelial	Endothelial - FGF20	FGFR4 - Endothelial	human
Endothelial	Endothelial	FGF21	FGFR2	FGF21 - FGFR2	FGF	0	0	-0.0126642	-0.0193736	0	0	0	-0.0160189	Endothelial - Endothelial	Endothelial - FGF21 - FGFR2 - Endothelial	Endothelial - FGF21	FGFR2 - Endothelial	human
Endothelial	Endothelial	FGF21	FGFR4	FGF21 - FGFR4	FGF	0	0.003471	-0.0126642	-0.0432188	0	0.00100167	0	-0.0279415	Endothelial - Endothelial	Endothelial - FGF21 - FGFR4 - Endothelial	Endothelial - FGF21	FGFR4 - Endothelial	human
Endothelial	Endothelial	FGF22	FGFR2	FGF22 - FGFR2	FGF	0.00126726	0	-0.0234843	-0.0193736	0.000500835	0	0	-0.021429	Endothelial - Endothelial	Endothelial - FGF22 - FGFR2 - Endothelial	Endothelial - FGF22	FGFR2 - Endothelial	human
Endothelial	Endothelial	FGF23	FGFR1	FGF23 - FGFR1	FGF	0.00029486	0.616358	-0.00740047	0.198752	0.000166945	0.319199	0.000181739	0.0956758	Endothelial - Endothelial	Endothelial - FGF23 - FGFR1 - Endothelial	Endothelial - FGF23	FGFR1 - Endothelial	human
Endothelial	Endothelial	FGF23	FGFR2	FGF23 - FGFR2	FGF	0.00029486	0	-0.00740047	-0.0193736	0.000166945	0	0	-0.013387	Endothelial - Endothelial	Endothelial - FGF23 - FGFR2 - Endothelial	Endothelial - FGF23	FGFR2 - Endothelial	human
Endothelial	Endothelial	FGF23	FGFR3	FGF23 - FGFR3	FGF	0.00029486	0.00429041	-0.00740047	-0.0158444	0.000166945	0.00233723	1.26507e-06	-0.0116224	Endothelial - Endothelial	Endothelial - FGF23 - FGFR3 - Endothelial	Endothelial - FGF23	FGFR3 - Endothelial	human
Endothelial	Endothelial	FGF23	FGFR4	FGF23 - FGFR4	FGF	0.00029486	0.003471	-0.00740047	-0.0432188	0.000166945	0.00100167	1.02346e-06	-0.0253096	Endothelial - Endothelial	Endothelial - FGF23 - FGFR4 - Endothelial	Endothelial - FGF23	FGFR4 - Endothelial	human
Endothelial	Endothelial	FGF23	PHEX	FGF23 - PHEX	FGF	0.00029486	0.0642931	-0.00740047	0.055445	0.000166945	0.0347245	1.89575e-05	0.0240222	Endothelial - Endothelial	Endothelial - FGF23 - PHEX - Endothelial	Endothelial - FGF23	PHEX - Endothelial	human
Endothelial	Endothelial	FGF2	CD44	FGF2 - CD44	FGF	0.103563	0.205523	-0.227679	-0.300826	0.0459098	0.100167	0.0212847	-0.264252	Endothelial - Endothelial	Endothelial - FGF2 - CD44 - Endothelial	Endothelial - FGF2	CD44 - Endothelial	human
Endothelial	Endothelial	FGF2	FGFR1	FGF2 - FGFR1	FGF	0.103563	0.616358	-0.227679	0.198752	0.0459098	0.319199	0.0638321	-0.0144634	Endothelial - Endothelial	Endothelial - FGF2 - FGFR1 - Endothelial	Endothelial - FGF2	FGFR1 - Endothelial	human
Endothelial	Endothelial	FGF2	FGFR2	FGF2 - FGFR2	FGF	0.103563	0	-0.227679	-0.0193736	0.0459098	0	0	-0.123526	Endothelial - Endothelial	Endothelial - FGF2 - FGFR2 - Endothelial	Endothelial - FGF2	FGFR2 - Endothelial	human
Endothelial	Endothelial	FGF2	FGFR3	FGF2 - FGFR3	FGF	0.103563	0.00429041	-0.227679	-0.0158444	0.0459098	0.00233723	0.00044433	-0.121762	Endothelial - Endothelial	Endothelial - FGF2 - FGFR3 - Endothelial	Endothelial - FGF2	FGFR3 - Endothelial	human
Endothelial	Endothelial	FGF2	FGFR4	FGF2 - FGFR4	FGF	0.103563	0.003471	-0.227679	-0.0432188	0.0459098	0.00100167	0.000359469	-0.135449	Endothelial - Endothelial	Endothelial - FGF2 - FGFR4 - Endothelial	Endothelial - FGF2	FGFR4 - Endothelial	human
Endothelial	Endothelial	FGF2	FGFRL1	FGF2 - FGFRL1	FGF	0.103563	0.030921	-0.227679	-0.0930846	0.0459098	0.0166945	0.00320228	-0.160382	Endothelial - Endothelial	Endothelial - FGF2 - FGFRL1 - Endothelial	Endothelial - FGF2	FGFRL1 - Endothelial	human
Endothelial	Endothelial	FGF2	GPC4	FGF2 - GPC4	FGF	0.103563	0.0055093	-0.227679	-0.14621	0.0459098	0.00166945	0.000570562	-0.186944	Endothelial - Endothelial	Endothelial - FGF2 - GPC4 - Endothelial	Endothelial - FGF2	GPC4 - Endothelial	human
Endothelial	Endothelial	FGF2	NRP1	FGF2 - NRP1	FGF	0.103563	1.11122	-0.227679	0.265715	0.0459098	0.539566	0.115082	0.0190183	Endothelial - Endothelial	Endothelial - FGF2 - NRP1 - Endothelial	Endothelial - FGF2	NRP1 - Endothelial	human
Endothelial	Endothelial	FGF2	SDC1	FGF2 - SDC1	FGF	0.103563	0.0350433	-0.227679	-0.278519	0.0459098	0.0128548	0.0036292	-0.253099	Endothelial - Endothelial	Endothelial - FGF2 - SDC1 - Endothelial	Endothelial - FGF2	SDC1 - Endothelial	human
Endothelial	Endothelial	FGF2	SDC2	FGF2 - SDC2	FGF	0.103563	0.0328693	-0.227679	-0.223341	0.0459098	0.0148581	0.00340406	-0.22551	Endothelial - Endothelial	Endothelial - FGF2 - SDC2 - Endothelial	Endothelial - FGF2	SDC2 - Endothelial	human
Endothelial	Endothelial	FGF2	SDC3	FGF2 - SDC3	FGF	0.103563	0.0938629	-0.227679	0.0312627	0.0459098	0.0504174	0.00972076	-0.098208	Endothelial - Endothelial	Endothelial - FGF2 - SDC3 - Endothelial	Endothelial - FGF2	SDC3 - Endothelial	human
Endothelial	Endothelial	FGF2	SDC4	FGF2 - SDC4	FGF	0.103563	0.143708	-0.227679	-0.386803	0.0459098	0.0676127	0.0148829	-0.307241	Endothelial - Endothelial	Endothelial - FGF2 - SDC4 - Endothelial	Endothelial - FGF2	SDC4 - Endothelial	human
Endothelial	Endothelial	FGF3	FGFR1	FGF3 - FGFR1	FGF	NA	0.616358	NA	0.198752	NA	0.319199	NA	NA	Endothelial - Endothelial	Endothelial - FGF3 - FGFR1 - Endothelial	Endothelial - FGF3	FGFR1 - Endothelial	human
Endothelial	Endothelial	FGF3	FGFR2	FGF3 - FGFR2	FGF	NA	0	NA	-0.0193736	NA	0	NA	NA	Endothelial - Endothelial	Endothelial - FGF3 - FGFR2 - Endothelial	Endothelial - FGF3	FGFR2 - Endothelial	human
Endothelial	Endothelial	FGF3	FGFR3	FGF3 - FGFR3	FGF	NA	0.00429041	NA	-0.0158444	NA	0.00233723	NA	NA	Endothelial - Endothelial	Endothelial - FGF3 - FGFR3 - Endothelial	Endothelial - FGF3	FGFR3 - Endothelial	human
Endothelial	Endothelial	FGF3	FGFR4	FGF3 - FGFR4	FGF	NA	0.003471	NA	-0.0432188	NA	0.00100167	NA	NA	Endothelial - Endothelial	Endothelial - FGF3 - FGFR4 - Endothelial	Endothelial - FGF3	FGFR4 - Endothelial	human
Endothelial	Endothelial	FGF4	FGFR1	FGF4 - FGFR1	FGF	NA	0.616358	NA	0.198752	NA	0.319199	NA	NA	Endothelial - Endothelial	Endothelial - FGF4 - FGFR1 - Endothelial	Endothelial - FGF4	FGFR1 - Endothelial	human
Endothelial	Endothelial	FGF4	FGFR2	FGF4 - FGFR2	FGF	NA	0	NA	-0.0193736	NA	0	NA	NA	Endothelial - Endothelial	Endothelial - FGF4 - FGFR2 - Endothelial	Endothelial - FGF4	FGFR2 - Endothelial	human
Endothelial	Endothelial	FGF4	FGFR3	FGF4 - FGFR3	FGF	NA	0.00429041	NA	-0.0158444	NA	0.00233723	NA	NA	Endothelial - Endothelial	Endothelial - FGF4 - FGFR3 - Endothelial	Endothelial - FGF4	FGFR3 - Endothelial	human
Endothelial	Endothelial	FGF4	FGFR4	FGF4 - FGFR4	FGF	NA	0.003471	NA	-0.0432188	NA	0.00100167	NA	NA	Endothelial - Endothelial	Endothelial - FGF4 - FGFR4 - Endothelial	Endothelial - FGF4	FGFR4 - Endothelial	human
Endothelial	Endothelial	FGF4	NRP1	FGF4 - NRP1	FGF	NA	1.11122	NA	0.265715	NA	0.539566	NA	NA	Endothelial - Endothelial	Endothelial - FGF4 - NRP1 - Endothelial	Endothelial - FGF4	NRP1 - Endothelial	human
Endothelial	Endothelial	FGF5	FGFR1	FGF5 - FGFR1	FGF	0.0349345	0.616358	-0.250859	0.198752	0.0126878	0.319199	0.0215321	-0.0260536	Endothelial - Endothelial	Endothelial - FGF5 - FGFR1 - Endothelial	Endothelial - FGF5	FGFR1 - Endothelial	human
Endothelial	Endothelial	FGF5	FGFR2	FGF5 - FGFR2	FGF	0.0349345	0	-0.250859	-0.0193736	0.0126878	0	0	-0.135116	Endothelial - Endothelial	Endothelial - FGF5 - FGFR2 - Endothelial	Endothelial - FGF5	FGFR2 - Endothelial	human
Endothelial	Endothelial	FGF5	FGFR3	FGF5 - FGFR3	FGF	0.0349345	0.00429041	-0.250859	-0.0158444	0.0126878	0.00233723	0.000149883	-0.133352	Endothelial - Endothelial	Endothelial - FGF5 - FGFR3 - Endothelial	Endothelial - FGF5	FGFR3 - Endothelial	human
Endothelial	Endothelial	FGF5	FGFR4	FGF5 - FGFR4	FGF	0.0349345	0.003471	-0.250859	-0.0432188	0.0126878	0.00100167	0.000121258	-0.147039	Endothelial - Endothelial	Endothelial - FGF5 - FGFR4 - Endothelial	Endothelial - FGF5	FGFR4 - Endothelial	human
Endothelial	Endothelial	FGF6	FGFR1	FGF6 - FGFR1	FGF	NA	0.616358	NA	0.198752	NA	0.319199	NA	NA	Endothelial - Endothelial	Endothelial - FGF6 - FGFR1 - Endothelial	Endothelial - FGF6	FGFR1 - Endothelial	human
Endothelial	Endothelial	FGF6	FGFR2	FGF6 - FGFR2	FGF	NA	0	NA	-0.0193736	NA	0	NA	NA	Endothelial - Endothelial	Endothelial - FGF6 - FGFR2 - Endothelial	Endothelial - FGF6	FGFR2 - Endothelial	human
Endothelial	Endothelial	FGF6	FGFR3	FGF6 - FGFR3	FGF	NA	0.00429041	NA	-0.0158444	NA	0.00233723	NA	NA	Endothelial - Endothelial	Endothelial - FGF6 - FGFR3 - Endothelial	Endothelial - FGF6	FGFR3 - Endothelial	human
Endothelial	Endothelial	FGF6	FGFR4	FGF6 - FGFR4	FGF	NA	0.003471	NA	-0.0432188	NA	0.00100167	NA	NA	Endothelial - Endothelial	Endothelial - FGF6 - FGFR4 - Endothelial	Endothelial - FGF6	FGFR4 - Endothelial	human
Endothelial	Endothelial	FGF6	SDC4	FGF6 - SDC4	FGF	NA	0.143708	NA	-0.386803	NA	0.0676127	NA	NA	Endothelial - Endothelial	Endothelial - FGF6 - SDC4 - Endothelial	Endothelial - FGF6	SDC4 - Endothelial	human
Endothelial	Endothelial	FGF7	FGFR1	FGF7 - FGFR1	FGF	0.023495	0.616358	-0.104703	0.198752	0.00534224	0.319199	0.0144813	0.0470244	Endothelial - Endothelial	Endothelial - FGF7 - FGFR1 - Endothelial	Endothelial - FGF7	FGFR1 - Endothelial	human
Endothelial	Endothelial	FGF7	FGFR2	FGF7 - FGFR2	FGF	0.023495	0	-0.104703	-0.0193736	0.00534224	0	0	-0.0620384	Endothelial - Endothelial	Endothelial - FGF7 - FGFR2 - Endothelial	Endothelial - FGF7	FGFR2 - Endothelial	human
Endothelial	Endothelial	FGF7	FGFR3	FGF7 - FGFR3	FGF	0.023495	0.00429041	-0.104703	-0.0158444	0.00534224	0.00233723	0.000100803	-0.0602738	Endothelial - Endothelial	Endothelial - FGF7 - FGFR3 - Endothelial	Endothelial - FGF7	FGFR3 - Endothelial	human
Endothelial	Endothelial	FGF7	FGFR4	FGF7 - FGFR4	FGF	0.023495	0.003471	-0.104703	-0.0432188	0.00534224	0.00100167	8.1551e-05	-0.073961	Endothelial - Endothelial	Endothelial - FGF7 - FGFR4 - Endothelial	Endothelial - FGF7	FGFR4 - Endothelial	human
Endothelial	Endothelial	FGF7	NRP1	FGF7 - NRP1	FGF	0.023495	1.11122	-0.104703	0.265715	0.00534224	0.539566	0.0261081	0.0805061	Endothelial - Endothelial	Endothelial - FGF7 - NRP1 - Endothelial	Endothelial - FGF7	NRP1 - Endothelial	human
Endothelial	Endothelial	FGF8	FGFR1	FGF8 - FGFR1	FGF	0	0.616358	-0.00907144	0.198752	0	0.319199	0	0.0948403	Endothelial - Endothelial	Endothelial - FGF8 - FGFR1 - Endothelial	Endothelial - FGF8	FGFR1 - Endothelial	human
Endothelial	Endothelial	FGF8	FGFR2	FGF8 - FGFR2	FGF	0	0	-0.00907144	-0.0193736	0	0	0	-0.0142225	Endothelial - Endothelial	Endothelial - FGF8 - FGFR2 - Endothelial	Endothelial - FGF8	FGFR2 - Endothelial	human
Endothelial	Endothelial	FGF8	FGFR3	FGF8 - FGFR3	FGF	0	0.00429041	-0.00907144	-0.0158444	0	0.00233723	0	-0.0124579	Endothelial - Endothelial	Endothelial - FGF8 - FGFR3 - Endothelial	Endothelial - FGF8	FGFR3 - Endothelial	human
Endothelial	Endothelial	FGF8	FGFR4	FGF8 - FGFR4	FGF	0	0.003471	-0.00907144	-0.0432188	0	0.00100167	0	-0.0261451	Endothelial - Endothelial	Endothelial - FGF8 - FGFR4 - Endothelial	Endothelial - FGF8	FGFR4 - Endothelial	human
Endothelial	Endothelial	FGF9	FGFR1	FGF9 - FGFR1	FGF	0.000201409	0.616358	-0.0694693	0.198752	0.000166945	0.319199	0.00012414	0.0646413	Endothelial - Endothelial	Endothelial - FGF9 - FGFR1 - Endothelial	Endothelial - FGF9	FGFR1 - Endothelial	human
Endothelial	Endothelial	FGF9	FGFR2	FGF9 - FGFR2	FGF	0.000201409	0	-0.0694693	-0.0193736	0.000166945	0	0	-0.0444215	Endothelial - Endothelial	Endothelial - FGF9 - FGFR2 - Endothelial	Endothelial - FGF9	FGFR2 - Endothelial	human
Endothelial	Endothelial	FGF9	FGFR3	FGF9 - FGFR3	FGF	0.000201409	0.00429041	-0.0694693	-0.0158444	0.000166945	0.00233723	8.64129e-07	-0.0426569	Endothelial - Endothelial	Endothelial - FGF9 - FGFR3 - Endothelial	Endothelial - FGF9	FGFR3 - Endothelial	human
Endothelial	Endothelial	FGF9	FGFR4	FGF9 - FGFR4	FGF	0.000201409	0.003471	-0.0694693	-0.0432188	0.000166945	0.00100167	6.99092e-07	-0.0563441	Endothelial - Endothelial	Endothelial - FGF9 - FGFR4 - Endothelial	Endothelial - FGF9	FGFR4 - Endothelial	human
Endothelial	Endothelial	FGG	ITGA2B	FGG - ITGA2B	UNCAT	0	0.00360779	-0.0310433	-0.0143037	0	0.00133556	0	-0.0226735	Endothelial - Endothelial	Endothelial - FGG - ITGA2B - Endothelial	Endothelial - FGG	ITGA2B - Endothelial	human
Endothelial	Endothelial	FGG	ITGA5	FGG - ITGA5	UNCAT	0	1.13311	-0.0310433	0.244101	0	0.556928	0	0.106529	Endothelial - Endothelial	Endothelial - FGG - ITGA5 - Endothelial	Endothelial - FGG	ITGA5 - Endothelial	human
Endothelial	Endothelial	FGG	ITGAV	FGG - ITGAV	UNCAT	0	0.857661	-0.0310433	0.117173	0	0.425543	0	0.0430646	Endothelial - Endothelial	Endothelial - FGG - ITGAV - Endothelial	Endothelial - FGG	ITGAV - Endothelial	human
Endothelial	Endothelial	FGG	ITGB1	FGG - ITGB1	UNCAT	0	2.24898	-0.0310433	0.131115	0	0.894825	0	0.0500358	Endothelial - Endothelial	Endothelial - FGG - ITGB1 - Endothelial	Endothelial - FGG	ITGB1 - Endothelial	human
Endothelial	Endothelial	FGG	ITGB2	FGG - ITGB2	UNCAT	0	0.0111766	-0.0310433	-0.176937	0	0.00417362	0	-0.10399	Endothelial - Endothelial	Endothelial - FGG - ITGB2 - Endothelial	Endothelial - FGG	ITGB2 - Endothelial	human
Endothelial	Endothelial	FGL1	EGFR	FGL1 - EGFR	EGF	0.00371158	0.0549946	-0.148092	-0.344129	0.00133556	0.0245409	0.000204117	-0.246111	Endothelial - Endothelial	Endothelial - FGL1 - EGFR - Endothelial	Endothelial - FGL1	EGFR - Endothelial	human
Endothelial	Endothelial	FIGF	FLT1	FIGF - FLT1	IGF	NA	0.665271	NA	0.332472	NA	0.33005	NA	NA	Endothelial - Endothelial	Endothelial - FIGF - FLT1 - Endothelial	Endothelial - FIGF	FLT1 - Endothelial	human
Endothelial	Endothelial	FIGF	FLT4	FIGF - FLT4	IGF	NA	0.166999	NA	0.15496	NA	0.0684474	NA	NA	Endothelial - Endothelial	Endothelial - FIGF - FLT4 - Endothelial	Endothelial - FIGF	FLT4 - Endothelial	human
Endothelial	Endothelial	FIGF	ITGA1	FIGF - ITGA1	IGF	NA	0.309819	NA	-0.0955117	NA	0.134224	NA	NA	Endothelial - Endothelial	Endothelial - FIGF - ITGA1 - Endothelial	Endothelial - FIGF	ITGA1 - Endothelial	human
Endothelial	Endothelial	FIGF	ITGA2	FIGF - ITGA2	IGF	NA	0.759539	NA	0.0792726	NA	0.376294	NA	NA	Endothelial - Endothelial	Endothelial - FIGF - ITGA2 - Endothelial	Endothelial - FIGF	ITGA2 - Endothelial	human
Endothelial	Endothelial	FIGF	ITGA4	FIGF - ITGA4	IGF	NA	0.0256639	NA	-0.205822	NA	0.00784641	NA	NA	Endothelial - Endothelial	Endothelial - FIGF - ITGA4 - Endothelial	Endothelial - FIGF	ITGA4 - Endothelial	human
Endothelial	Endothelial	FIGF	ITGA5	FIGF - ITGA5	IGF	NA	1.13311	NA	0.244101	NA	0.556928	NA	NA	Endothelial - Endothelial	Endothelial - FIGF - ITGA5 - Endothelial	Endothelial - FIGF	ITGA5 - Endothelial	human
Endothelial	Endothelial	FIGF	ITGA9	FIGF - ITGA9	IGF	NA	0.00274637	NA	-0.0156075	NA	0.00116861	NA	NA	Endothelial - Endothelial	Endothelial - FIGF - ITGA9 - Endothelial	Endothelial - FIGF	ITGA9 - Endothelial	human
Endothelial	Endothelial	FIGF	ITGB1	FIGF - ITGB1	IGF	NA	2.24898	NA	0.131115	NA	0.894825	NA	NA	Endothelial - Endothelial	Endothelial - FIGF - ITGB1 - Endothelial	Endothelial - FIGF	ITGB1 - Endothelial	human
Endothelial	Endothelial	FIGF	KDR	FIGF - KDR	IGF	NA	1.25924	NA	0.499977	NA	0.577629	NA	NA	Endothelial - Endothelial	Endothelial - FIGF - KDR - Endothelial	Endothelial - FIGF	KDR - Endothelial	human
Endothelial	Endothelial	FIGF	NRP2	FIGF - NRP2	IGF	NA	1.13951	NA	0.341122	NA	0.539733	NA	NA	Endothelial - Endothelial	Endothelial - FIGF - NRP2 - Endothelial	Endothelial - FIGF	NRP2 - Endothelial	human
Endothelial	Endothelial	FLT3LG	FLT3	FLT3LG - FLT3	UNCAT	0.012415	NA	-0.0550754	NA	0.00751252	NA	NA	NA	Endothelial - Endothelial	Endothelial - FLT3LG - FLT3 - Endothelial	Endothelial - FLT3LG	FLT3 - Endothelial	human
Endothelial	Endothelial	FN1	C5AR1	FN1 - C5AR1	Complement	2.86294	0.00304265	0.16494	-0.0583637	0.941736	0.000500835	0.00871091	0.0532882	Endothelial - Endothelial	Endothelial - FN1 - C5AR1 - Endothelial	Endothelial - FN1	C5AR1 - Endothelial	human
Endothelial	Endothelial	FN1	CD44	FN1 - CD44	Fibronectin	2.86294	0.205523	0.16494	-0.300826	0.941736	0.100167	0.588401	-0.0679428	Endothelial - Endothelial	Endothelial - FN1 - CD44 - Endothelial	Endothelial - FN1	CD44 - Endothelial	human
Endothelial	Endothelial	FN1	CD79A	FN1 - CD79A	Fibronectin	2.86294	0.000877039	0.16494	-0.015956	0.941736	0.000500835	0.00251091	0.074492	Endothelial - Endothelial	Endothelial - FN1 - CD79A - Endothelial	Endothelial - FN1	CD79A - Endothelial	human
Endothelial	Endothelial	FN1	COL13A1	FN1 - COL13A1	Fibronectin	2.86294	0.0598719	0.16494	-0.0950567	0.941736	0.0370618	0.17141	0.0349417	Endothelial - Endothelial	Endothelial - FN1 - COL13A1 - Endothelial	Endothelial - FN1	COL13A1 - Endothelial	human
Endothelial	Endothelial	FN1	FLT4	FN1 - FLT4	Fibronectin	2.86294	0.166999	0.16494	0.15496	0.941736	0.0684474	0.478107	0.15995	Endothelial - Endothelial	Endothelial - FN1 - FLT4 - Endothelial	Endothelial - FN1	FLT4 - Endothelial	human
Endothelial	Endothelial	FN1	IL17RC	FN1 - IL17RC	Fibronectin	2.86294	0.0517762	0.16494	-0.0392079	0.941736	0.027212	0.148232	0.0628661	Endothelial - Endothelial	Endothelial - FN1 - IL17RC - Endothelial	Endothelial - FN1	IL17RC - Endothelial	human
Endothelial	Endothelial	FN1	ITGA2	FN1 - ITGA2	Fibronectin	2.86294	0.759539	0.16494	0.0792726	0.941736	0.376294	2.17451	0.122106	Endothelial - Endothelial	Endothelial - FN1 - ITGA2 - Endothelial	Endothelial - FN1	ITGA2 - Endothelial	human
Endothelial	Endothelial	FN1	ITGA2B	FN1 - ITGA2B	Fibronectin	2.86294	0.00360779	0.16494	-0.0143037	0.941736	0.00133556	0.0103289	0.0753182	Endothelial - Endothelial	Endothelial - FN1 - ITGA2B - Endothelial	Endothelial - FN1	ITGA2B - Endothelial	human
Endothelial	Endothelial	FN1	ITGA3	FN1 - ITGA3	Fibronectin	2.86294	0.214703	0.16494	-0.363692	0.941736	0.101169	0.614681	-0.0993762	Endothelial - Endothelial	Endothelial - FN1 - ITGA3 - Endothelial	Endothelial - FN1	ITGA3 - Endothelial	human
Endothelial	Endothelial	FN1	ITGA4	FN1 - ITGA4	Fibronectin	2.86294	0.0256639	0.16494	-0.205822	0.941736	0.00784641	0.0734743	-0.020441	Endothelial - Endothelial	Endothelial - FN1 - ITGA4 - Endothelial	Endothelial - FN1	ITGA4 - Endothelial	human
Endothelial	Endothelial	FN1	ITGA5	FN1 - ITGA5	Fibronectin	2.86294	1.13311	0.16494	0.244101	0.941736	0.556928	3.24401	0.20452	Endothelial - Endothelial	Endothelial - FN1 - ITGA5 - Endothelial	Endothelial - FN1	ITGA5 - Endothelial	human
Endothelial	Endothelial	FN1	ITGA6	FN1 - ITGA6	Fibronectin	2.86294	1.31566	0.16494	0.512845	0.941736	0.591653	3.76667	0.338893	Endothelial - Endothelial	Endothelial - FN1 - ITGA6 - Endothelial	Endothelial - FN1	ITGA6 - Endothelial	human
Endothelial	Endothelial	FN1	ITGA8	FN1 - ITGA8	Fibronectin	2.86294	0.00172909	0.16494	-0.0269042	0.941736	0.00100167	0.00495027	0.069018	Endothelial - Endothelial	Endothelial - FN1 - ITGA8 - Endothelial	Endothelial - FN1	ITGA8 - Endothelial	human
Endothelial	Endothelial	FN1	ITGA9	FN1 - ITGA9	Fibronectin	2.86294	0.00274637	0.16494	-0.0156075	0.941736	0.00116861	0.00786271	0.0746663	Endothelial - Endothelial	Endothelial - FN1 - ITGA9 - Endothelial	Endothelial - FN1	ITGA9 - Endothelial	human
Endothelial	Endothelial	FN1	ITGAV	FN1 - ITGAV	Fibronectin	2.86294	0.857661	0.16494	0.117173	0.941736	0.425543	2.45543	0.141056	Endothelial - Endothelial	Endothelial - FN1 - ITGAV - Endothelial	Endothelial - FN1	ITGAV - Endothelial	human
Endothelial	Endothelial	FN1	ITGB1	FN1 - ITGB1	Fibronectin	2.86294	2.24898	0.16494	0.131115	0.941736	0.894825	6.4387	0.148027	Endothelial - Endothelial	Endothelial - FN1 - ITGB1 - Endothelial	Endothelial - FN1	ITGB1 - Endothelial	human
Endothelial	Endothelial	FN1	ITGB3	FN1 - ITGB3	Fibronectin	2.86294	0.0218954	0.16494	-0.0518058	0.941736	0.0135225	0.0626851	0.0565671	Endothelial - Endothelial	Endothelial - FN1 - ITGB3 - Endothelial	Endothelial - FN1	ITGB3 - Endothelial	human
Endothelial	Endothelial	FN1	ITGB6	FN1 - ITGB6	Fibronectin	2.86294	0.0138409	0.16494	-0.155946	0.941736	0.0066778	0.0396255	0.00449695	Endothelial - Endothelial	Endothelial - FN1 - ITGB6 - Endothelial	Endothelial - FN1	ITGB6 - Endothelial	human
Endothelial	Endothelial	FN1	ITGB7	FN1 - ITGB7	Fibronectin	2.86294	0.000147676	0.16494	-0.028311	0.941736	0.000166945	0.000422787	0.0683145	Endothelial - Endothelial	Endothelial - FN1 - ITGB7 - Endothelial	Endothelial - FN1	ITGB7 - Endothelial	human
Endothelial	Endothelial	FN1	ITGB8	FN1 - ITGB8	Fibronectin	2.86294	0.0208951	0.16494	-0.0167671	0.941736	0.0135225	0.0598215	0.0740865	Endothelial - Endothelial	Endothelial - FN1 - ITGB8 - Endothelial	Endothelial - FN1	ITGB8 - Endothelial	human
Endothelial	Endothelial	FN1	MAG	FN1 - MAG	Fibronectin	2.86294	NA	0.16494	NA	0.941736	NA	NA	NA	Endothelial - Endothelial	Endothelial - FN1 - MAG - Endothelial	Endothelial - FN1	MAG - Endothelial	human
Endothelial	Endothelial	FN1	NT5E	FN1 - NT5E	Fibronectin	2.86294	0.411772	0.16494	-0.315751	0.941736	0.215192	1.17888	-0.0754054	Endothelial - Endothelial	Endothelial - FN1 - NT5E - Endothelial	Endothelial - FN1	NT5E - Endothelial	human
Endothelial	Endothelial	FN1	PLAUR	FN1 - PLAUR	Fibronectin	2.86294	0.317464	0.16494	-0.206125	0.941736	0.155593	0.908881	-0.0205926	Endothelial - Endothelial	Endothelial - FN1 - PLAUR - Endothelial	Endothelial - FN1	PLAUR - Endothelial	human
Endothelial	Endothelial	FN1	ROBO4	FN1 - ROBO4	Fibronectin	2.86294	0.878692	0.16494	0.439129	0.941736	0.448581	2.51564	0.302034	Endothelial - Endothelial	Endothelial - FN1 - ROBO4 - Endothelial	Endothelial - FN1	ROBO4 - Endothelial	human
Endothelial	Endothelial	FN1	SDC2	FN1 - SDC2	Fibronectin	2.86294	0.0328693	0.16494	-0.223341	0.941736	0.0148581	0.0941029	-0.0292004	Endothelial - Endothelial	Endothelial - FN1 - SDC2 - Endothelial	Endothelial - FN1	SDC2 - Endothelial	human
Endothelial	Endothelial	FN1	TMPRSS6	FN1 - TMPRSS6	Fibronectin	2.86294	0	0.16494	-0.0100779	0.941736	0	0	0.0774311	Endothelial - Endothelial	Endothelial - FN1 - TMPRSS6 - Endothelial	Endothelial - FN1	TMPRSS6 - Endothelial	human
Endothelial	Endothelial	FN1	TNFRSF11B	FN1 - TNFRSF11B	Fibronectin	2.86294	0.0414687	0.16494	-0.0947882	0.941736	0.0185309	0.118722	0.035076	Endothelial - Endothelial	Endothelial - FN1 - TNFRSF11B - Endothelial	Endothelial - FN1	TNFRSF11B - Endothelial	human
Endothelial	Endothelial	FN1	TSHR	FN1 - TSHR	Fibronectin	2.86294	0	0.16494	-0.0118532	0.941736	0	0	0.0765434	Endothelial - Endothelial	Endothelial - FN1 - TSHR - Endothelial	Endothelial - FN1	TSHR - Endothelial	human
Endothelial	Endothelial	FSHB	FSHR	FSHB - FSHR	UNCAT	NA	NA	NA	NA	NA	NA	NA	NA	Endothelial - Endothelial	Endothelial - FSHB - FSHR - Endothelial	Endothelial - FSHB	FSHR - Endothelial	human
Endothelial	Endothelial	FST	BMPR1B	FST - BMPR1B	BMP	0.118768	0.0106833	-0.27193	-0.0143942	0.0432387	0.00500835	0.00126883	-0.143162	Endothelial - Endothelial	Endothelial - FST - BMPR1B - Endothelial	Endothelial - FST	BMPR1B - Endothelial	human
Endothelial	Endothelial	FST	BMPR2	FST - BMPR2	BMP	0.118768	1.13223	-0.27193	0.39767	0.0432387	0.550584	0.134473	0.0628697	Endothelial - Endothelial	Endothelial - FST - BMPR2 - Endothelial	Endothelial - FST	BMPR2 - Endothelial	human
Endothelial	Endothelial	FST	HFE2	FST - HFE2	UNCAT	0.118768	NA	-0.27193	NA	0.0432387	NA	NA	NA	Endothelial - Endothelial	Endothelial - FST - HFE2 - Endothelial	Endothelial - FST	HFE2 - Endothelial	human
Endothelial	Endothelial	GALP	GALR1	GALP - GALR1	UNCAT	NA	0.000640904	NA	-0.0123474	NA	0.000166945	NA	NA	Endothelial - Endothelial	Endothelial - GALP - GALR1 - Endothelial	Endothelial - GALP	GALR1 - Endothelial	human
Endothelial	Endothelial	GALP	GALR2	GALP - GALR2	UNCAT	NA	0.000754631	NA	-0.0137238	NA	0.00066778	NA	NA	Endothelial - Endothelial	Endothelial - GALP - GALR2 - Endothelial	Endothelial - GALP	GALR2 - Endothelial	human
Endothelial	Endothelial	GALP	GALR3	GALP - GALR3	UNCAT	NA	0.00264995	NA	-0.0119995	NA	0.0015025	NA	NA	Endothelial - Endothelial	Endothelial - GALP - GALR3 - Endothelial	Endothelial - GALP	GALR3 - Endothelial	human
Endothelial	Endothelial	GAL	GALR1	GAL - GALR1	UNCAT	0.0469315	0.000640904	-0.095126	-0.0123474	0.0265442	0.000166945	3.00786e-05	-0.0537367	Endothelial - Endothelial	Endothelial - GAL - GALR1 - Endothelial	Endothelial - GAL	GALR1 - Endothelial	human
Endothelial	Endothelial	GAL	GALR2	GAL - GALR2	UNCAT	0.0469315	0.000754631	-0.095126	-0.0137238	0.0265442	0.00066778	3.5416e-05	-0.0544249	Endothelial - Endothelial	Endothelial - GAL - GALR2 - Endothelial	Endothelial - GAL	GALR2 - Endothelial	human
Endothelial	Endothelial	GAL	GALR3	GAL - GALR3	UNCAT	0.0469315	0.00264995	-0.095126	-0.0119995	0.0265442	0.0015025	0.000124366	-0.0535627	Endothelial - Endothelial	Endothelial - GAL - GALR3 - Endothelial	Endothelial - GAL	GALR3 - Endothelial	human
Endothelial	Endothelial	GAL	GPR151	GAL - GPR151	UNCAT	0.0469315	0.00161718	-0.095126	-0.0104586	0.0265442	0.000500835	7.58968e-05	-0.0527923	Endothelial - Endothelial	Endothelial - GAL - GPR151 - Endothelial	Endothelial - GAL	GPR151 - Endothelial	human
Endothelial	Endothelial	GAS6	AXL	GAS6 - AXL	Cell-cell adhesion	0.389218	0.145477	-0.00282798	-0.24721	0.184307	0.0779633	0.0566222	-0.125019	Endothelial - Endothelial	Endothelial - GAS6 - AXL - Endothelial	Endothelial - GAS6	AXL - Endothelial	human
Endothelial	Endothelial	GAS6	MERTK	GAS6 - MERTK	Cell-cell adhesion	0.389218	0.10546	-0.00282798	0.112852	0.184307	0.0550918	0.0410469	0.0550122	Endothelial - Endothelial	Endothelial - GAS6 - MERTK - Endothelial	Endothelial - GAS6	MERTK - Endothelial	human
Endothelial	Endothelial	GAS6	TYRO3	GAS6 - TYRO3	Cell-cell adhesion	0.389218	0.0286165	-0.00282798	-0.0400052	0.184307	0.0143573	0.0111381	-0.0214166	Endothelial - Endothelial	Endothelial - GAS6 - TYRO3 - Endothelial	Endothelial - GAS6	TYRO3 - Endothelial	human
Endothelial	Endothelial	GAST	CCKBR	GAST - CCKBR	UNCAT	0	NA	-0.00907144	NA	0	NA	NA	NA	Endothelial - Endothelial	Endothelial - GAST - CCKBR - Endothelial	Endothelial - GAST	CCKBR - Endothelial	human
Endothelial	Endothelial	GCG	GCGR	GCG - GCGR	UNCAT	0	0	0	0	0	0	0	0	Endothelial - Endothelial	Endothelial - GCG - GCGR - Endothelial	Endothelial - GCG	GCGR - Endothelial	human
Endothelial	Endothelial	GCG	GLP1R	GCG - GLP1R	UNCAT	0	NA	0	NA	0	NA	NA	NA	Endothelial - Endothelial	Endothelial - GCG - GLP1R - Endothelial	Endothelial - GCG	GLP1R - Endothelial	human
Endothelial	Endothelial	GCG	GLP2R	GCG - GLP2R	UNCAT	0	NA	0	NA	0	NA	NA	NA	Endothelial - Endothelial	Endothelial - GCG - GLP2R - Endothelial	Endothelial - GCG	GLP2R - Endothelial	human
Endothelial	Endothelial	GDF10	ACVR1B	GDF10 - ACVR1B	UNCAT	NA	0.0820667	NA	0.0309063	NA	0.0460768	NA	NA	Endothelial - Endothelial	Endothelial - GDF10 - ACVR1B - Endothelial	Endothelial - GDF10	ACVR1B - Endothelial	human
Endothelial	Endothelial	GDF11	ACVR1B	GDF11 - ACVR1B	UNCAT	0.147097	0.0820667	-0.0246598	0.0309063	0.0712855	0.0460768	0.0120717	0.00312325	Endothelial - Endothelial	Endothelial - GDF11 - ACVR1B - Endothelial	Endothelial - GDF11	ACVR1B - Endothelial	human
Endothelial	Endothelial	GDF11	ACVR2A	GDF11 - ACVR2A	UNCAT	0.147097	0.0908898	-0.0246598	0.0372982	0.0712855	0.0474124	0.0133696	0.00631919	Endothelial - Endothelial	Endothelial - GDF11 - ACVR2A - Endothelial	Endothelial - GDF11	ACVR2A - Endothelial	human
Endothelial	Endothelial	GDF11	ACVR2B	GDF11 - ACVR2B	UNCAT	0.147097	0.0650963	-0.0246598	0.0257092	0.0712855	0.0322204	0.00957546	0.000524696	Endothelial - Endothelial	Endothelial - GDF11 - ACVR2B - Endothelial	Endothelial - GDF11	ACVR2B - Endothelial	human
Endothelial	Endothelial	GDF2	ACVR1	GDF2 - ACVR1	UNCAT	NA	0.105993	NA	-0.0187219	NA	0.0580968	NA	NA	Endothelial - Endothelial	Endothelial - GDF2 - ACVR1 - Endothelial	Endothelial - GDF2	ACVR1 - Endothelial	human
Endothelial	Endothelial	GDF2	ACVR2A	GDF2 - ACVR2A	UNCAT	NA	0.0908898	NA	0.0372982	NA	0.0474124	NA	NA	Endothelial - Endothelial	Endothelial - GDF2 - ACVR2A - Endothelial	Endothelial - GDF2	ACVR2A - Endothelial	human
Endothelial	Endothelial	GDF2	ACVR2B	GDF2 - ACVR2B	UNCAT	NA	0.0650963	NA	0.0257092	NA	0.0322204	NA	NA	Endothelial - Endothelial	Endothelial - GDF2 - ACVR2B - Endothelial	Endothelial - GDF2	ACVR2B - Endothelial	human
Endothelial	Endothelial	GDF2	ACVRL1	GDF2 - ACVRL1	UNCAT	NA	0.680497	NA	0.378819	NA	0.360935	NA	NA	Endothelial - Endothelial	Endothelial - GDF2 - ACVRL1 - Endothelial	Endothelial - GDF2	ACVRL1 - Endothelial	human
Endothelial	Endothelial	GDF2	BMPR2	GDF2 - BMPR2	BMP	NA	1.13223	NA	0.39767	NA	0.550584	NA	NA	Endothelial - Endothelial	Endothelial - GDF2 - BMPR2 - Endothelial	Endothelial - GDF2	BMPR2 - Endothelial	human
Endothelial	Endothelial	GDF2	ENG	GDF2 - ENG	UNCAT	NA	1.26612	NA	0.46191	NA	0.610017	NA	NA	Endothelial - Endothelial	Endothelial - GDF2 - ENG - Endothelial	Endothelial - GDF2	ENG - Endothelial	human
Endothelial	Endothelial	GDF5	ACVR1	GDF5 - ACVR1	UNCAT	0.000286265	0.105993	-0.0310592	-0.0187219	0.000166945	0.0580968	3.03419e-05	-0.0248905	Endothelial - Endothelial	Endothelial - GDF5 - ACVR1 - Endothelial	Endothelial - GDF5	ACVR1 - Endothelial	human
Endothelial	Endothelial	GDF5	ACVR2A	GDF5 - ACVR2A	UNCAT	0.000286265	0.0908898	-0.0310592	0.0372982	0.000166945	0.0474124	2.60186e-05	0.00311947	Endothelial - Endothelial	Endothelial - GDF5 - ACVR2A - Endothelial	Endothelial - GDF5	ACVR2A - Endothelial	human
Endothelial	Endothelial	GDF5	ACVR2B	GDF5 - ACVR2B	UNCAT	0.000286265	0.0650963	-0.0310592	0.0257092	0.000166945	0.0322204	1.86348e-05	-0.00267502	Endothelial - Endothelial	Endothelial - GDF5 - ACVR2B - Endothelial	Endothelial - GDF5	ACVR2B - Endothelial	human
Endothelial	Endothelial	GDF5	BMPR1A	GDF5 - BMPR1A	BMP	0.000286265	0.0085866	-0.0310592	-0.144691	0.000166945	0.00450751	2.45804e-06	-0.0878753	Endothelial - Endothelial	Endothelial - GDF5 - BMPR1A - Endothelial	Endothelial - GDF5	BMPR1A - Endothelial	human
Endothelial	Endothelial	GDF5	BMPR1B	GDF5 - BMPR1B	BMP	0.000286265	0.0106833	-0.0310592	-0.0143942	0.000166945	0.00500835	3.05824e-06	-0.0227267	Endothelial - Endothelial	Endothelial - GDF5 - BMPR1B - Endothelial	Endothelial - GDF5	BMPR1B - Endothelial	human
Endothelial	Endothelial	GDF5	BMPR2	GDF5 - BMPR2	BMP	0.000286265	1.13223	-0.0310592	0.39767	0.000166945	0.550584	0.000324117	0.183305	Endothelial - Endothelial	Endothelial - GDF5 - BMPR2 - Endothelial	Endothelial - GDF5	BMPR2 - Endothelial	human
Endothelial	Endothelial	GDF5	ROR2	GDF5 - ROR2	UNCAT	0.000286265	0.000742494	-0.0310592	-0.0271978	0.000166945	0.000500835	2.1255e-07	-0.0291285	Endothelial - Endothelial	Endothelial - GDF5 - ROR2 - Endothelial	Endothelial - GDF5	ROR2 - Endothelial	human
Endothelial	Endothelial	GDF6	BMPR1A	GDF6 - BMPR1A	BMP	0.000662012	0.0085866	-0.013766	-0.144691	0.00033389	0.00450751	5.68444e-06	-0.0792287	Endothelial - Endothelial	Endothelial - GDF6 - BMPR1A - Endothelial	Endothelial - GDF6	BMPR1A - Endothelial	human
Endothelial	Endothelial	GDF6	BMPR1B	GDF6 - BMPR1B	BMP	0.000662012	0.0106833	-0.013766	-0.0143942	0.00033389	0.00500835	7.07245e-06	-0.0140801	Endothelial - Endothelial	Endothelial - GDF6 - BMPR1B - Endothelial	Endothelial - GDF6	BMPR1B - Endothelial	human
Endothelial	Endothelial	GDF6	BMPR2	GDF6 - BMPR2	BMP	0.000662012	1.13223	-0.013766	0.39767	0.00033389	0.550584	0.00074955	0.191952	Endothelial - Endothelial	Endothelial - GDF6 - BMPR2 - Endothelial	Endothelial - GDF6	BMPR2 - Endothelial	human
Endothelial	Endothelial	GDF7	ACVR2A	GDF7 - ACVR2A	UNCAT	0.00739577	0.0908898	-0.023429	0.0372982	0.00534224	0.0474124	0.0006722	0.00693457	Endothelial - Endothelial	Endothelial - GDF7 - ACVR2A - Endothelial	Endothelial - GDF7	ACVR2A - Endothelial	human
Endothelial	Endothelial	GDF7	BMPR1A	GDF7 - BMPR1A	BMP	0.00739577	0.0085866	-0.023429	-0.144691	0.00534224	0.00450751	6.35046e-05	-0.0840602	Endothelial - Endothelial	Endothelial - GDF7 - BMPR1A - Endothelial	Endothelial - GDF7	BMPR1A - Endothelial	human
Endothelial	Endothelial	GDF7	BMPR2	GDF7 - BMPR2	BMP	0.00739577	1.13223	-0.023429	0.39767	0.00534224	0.550584	0.00837371	0.18712	Endothelial - Endothelial	Endothelial - GDF7 - BMPR2 - Endothelial	Endothelial - GDF7	BMPR2 - Endothelial	human
Endothelial	Endothelial	GDF9	ACVR2A	GDF9 - ACVR2A	UNCAT	0.00193876	0.0908898	-0.00924974	0.0372982	0.00066778	0.0474124	0.000176214	0.0140242	Endothelial - Endothelial	Endothelial - GDF9 - ACVR2A - Endothelial	Endothelial - GDF9	ACVR2A - Endothelial	human
Endothelial	Endothelial	GDF9	BMPR1A	GDF9 - BMPR1A	BMP	0.00193876	0.0085866	-0.00924974	-0.144691	0.00066778	0.00450751	1.66474e-05	-0.0769706	Endothelial - Endothelial	Endothelial - GDF9 - BMPR1A - Endothelial	Endothelial - GDF9	BMPR1A - Endothelial	human
Endothelial	Endothelial	GDF9	BMPR1B	GDF9 - BMPR1B	BMP	0.00193876	0.0106833	-0.00924974	-0.0143942	0.00066778	0.00500835	2.07123e-05	-0.011822	Endothelial - Endothelial	Endothelial - GDF9 - BMPR1B - Endothelial	Endothelial - GDF9	BMPR1B - Endothelial	human
Endothelial	Endothelial	GDF9	BMPR2	GDF9 - BMPR2	BMP	0.00193876	1.13223	-0.00924974	0.39767	0.00066778	0.550584	0.00219512	0.19421	Endothelial - Endothelial	Endothelial - GDF9 - BMPR2 - Endothelial	Endothelial - GDF9	BMPR2 - Endothelial	human
Endothelial	Endothelial	GDF9	FXYD6	GDF9 - FXYD6	UNCAT	0.00193876	0.0099556	-0.00924974	-0.00506453	0.00066778	0.0033389	1.93015e-05	-0.00715714	Endothelial - Endothelial	Endothelial - GDF9 - FXYD6 - Endothelial	Endothelial - GDF9	FXYD6 - Endothelial	human
Endothelial	Endothelial	GDF9	ORAI2	GDF9 - ORAI2	UNCAT	0.00193876	0.518742	-0.00924974	0.126684	0.00066778	0.274457	0.00100572	0.0587171	Endothelial - Endothelial	Endothelial - GDF9 - ORAI2 - Endothelial	Endothelial - GDF9	ORAI2 - Endothelial	human
Endothelial	Endothelial	GDF9	TGFBR1	GDF9 - TGFBR1	UNCAT	0.00193876	0.0788557	-0.00924974	-0.0549375	0.00066778	0.0392321	0.000152882	-0.0320936	Endothelial - Endothelial	Endothelial - GDF9 - TGFBR1 - Endothelial	Endothelial - GDF9	TGFBR1 - Endothelial	human
Endothelial	Endothelial	GDNF	EDNRB	GDNF - EDNRB	UNCAT	0.000677307	0.164908	-0.0617008	0.158907	0.000166945	0.0754591	0.000111693	0.0486029	Endothelial - Endothelial	Endothelial - GDNF - EDNRB - Endothelial	Endothelial - GDNF	EDNRB - Endothelial	human
Endothelial	Endothelial	GDNF	GFRA1	GDNF - GFRA1	UNCAT	0.000677307	0	-0.0617008	-0.0179888	0.000166945	0	0	-0.0398448	Endothelial - Endothelial	Endothelial - GDNF - GFRA1 - Endothelial	Endothelial - GDNF	GFRA1 - Endothelial	human
Endothelial	Endothelial	GDNF	GFRA2	GDNF - GFRA2	UNCAT	0.000677307	0	-0.0617008	0	0.000166945	0	0	-0.0308504	Endothelial - Endothelial	Endothelial - GDNF - GFRA2 - Endothelial	Endothelial - GDNF	GFRA2 - Endothelial	human
Endothelial	Endothelial	GDNF	RET	GDNF - RET	UNCAT	0.000677307	0	-0.0617008	-0.0146775	0.000166945	0	0	-0.0381891	Endothelial - Endothelial	Endothelial - GDNF - RET - Endothelial	Endothelial - GDNF	RET - Endothelial	human
Endothelial	Endothelial	GDNF	SLC44A5	GDNF - SLC44A5	UNCAT	0.000677307	0.0145574	-0.0617008	0.0158335	0.000166945	0.00868114	9.85982e-06	-0.0229336	Endothelial - Endothelial	Endothelial - GDNF - SLC44A5 - Endothelial	Endothelial - GDNF	SLC44A5 - Endothelial	human
Endothelial	Endothelial	GH1	GHR	GH1 - GHR	UNCAT	NA	0.00862961	NA	-0.0201739	NA	0.00467446	NA	NA	Endothelial - Endothelial	Endothelial - GH1 - GHR - Endothelial	Endothelial - GH1	GHR - Endothelial	human
Endothelial	Endothelial	GH1	PRLR	GH1 - PRLR	UNCAT	NA	0	NA	-0.0367739	NA	0	NA	NA	Endothelial - Endothelial	Endothelial - GH1 - PRLR - Endothelial	Endothelial - GH1	PRLR - Endothelial	human
Endothelial	Endothelial	GH2	GHR	GH2 - GHR	UNCAT	NA	0.00862961	NA	-0.0201739	NA	0.00467446	NA	NA	Endothelial - Endothelial	Endothelial - GH2 - GHR - Endothelial	Endothelial - GH2	GHR - Endothelial	human
Endothelial	Endothelial	GHRH	GHRHR	GHRH - GHRHR	UNCAT	NA	0.000868589	NA	-0.0116169	NA	0.000500835	NA	NA	Endothelial - Endothelial	Endothelial - GHRH - GHRHR - Endothelial	Endothelial - GHRH	GHRHR - Endothelial	human
Endothelial	Endothelial	GHRH	VIPR1	GHRH - VIPR1	UNCAT	NA	0.0167012	NA	-0.0845654	NA	0.00734558	NA	NA	Endothelial - Endothelial	Endothelial - GHRH - VIPR1 - Endothelial	Endothelial - GHRH	VIPR1 - Endothelial	human
Endothelial	Endothelial	GHRL	GHRHR	GHRL - GHRHR	UNCAT	0.00446375	0.000868589	-0.0230896	-0.0116169	0.00250417	0.000500835	3.87716e-06	-0.0173533	Endothelial - Endothelial	Endothelial - GHRL - GHRHR - Endothelial	Endothelial - GHRL	GHRHR - Endothelial	human
Endothelial	Endothelial	GHRL	GHSR	GHRL - GHSR	UNCAT	0.00446375	NA	-0.0230896	NA	0.00250417	NA	NA	NA	Endothelial - Endothelial	Endothelial - GHRL - GHSR - Endothelial	Endothelial - GHRL	GHSR - Endothelial	human
Endothelial	Endothelial	GHRL	GPR39	GHRL - GPR39	UNCAT	0.00446375	0.00157813	-0.0230896	-0.102651	0.00250417	0.000500835	7.04436e-06	-0.0628705	Endothelial - Endothelial	Endothelial - GHRL - GPR39 - Endothelial	Endothelial - GHRL	GPR39 - Endothelial	human
Endothelial	Endothelial	GHRL	MLNR	GHRL - MLNR	UNCAT	0.00446375	NA	-0.0230896	NA	0.00250417	NA	NA	NA	Endothelial - Endothelial	Endothelial - GHRL - MLNR - Endothelial	Endothelial - GHRL	MLNR - Endothelial	human
Endothelial	Endothelial	GIP	DPP4	GIP - DPP4	UNCAT	0	0.0418244	-0.0265814	-0.141561	0	0.0178631	0	-0.0840714	Endothelial - Endothelial	Endothelial - GIP - DPP4 - Endothelial	Endothelial - GIP	DPP4 - Endothelial	human
Endothelial	Endothelial	GIP	GIPR	GIP - GIPR	UNCAT	0	0.000168885	-0.0265814	-0.0429225	0	0.00033389	0	-0.0347519	Endothelial - Endothelial	Endothelial - GIP - GIPR - Endothelial	Endothelial - GIP	GIPR - Endothelial	human
Endothelial	Endothelial	GIP	INSR	GIP - INSR	UNCAT	0	0.753284	-0.0265814	0.254728	0	0.275626	0	0.114073	Endothelial - Endothelial	Endothelial - GIP - INSR - Endothelial	Endothelial - GIP	INSR - Endothelial	human
Endothelial	Endothelial	GNAI2	ADCY1	GNAI2 - ADCY1	UNCAT	1.83571	0.00383875	0.398451	-0.0164344	0.806344	0.00267112	0.00704681	0.191009	Endothelial - Endothelial	Endothelial - GNAI2 - ADCY1 - Endothelial	Endothelial - GNAI2	ADCY1 - Endothelial	human
Endothelial	Endothelial	GNAI2	ADCY7	GNAI2 - ADCY7	UNCAT	1.83571	0.00695832	0.398451	-0.0423674	0.806344	0.00350584	0.0127734	0.178042	Endothelial - Endothelial	Endothelial - GNAI2 - ADCY7 - Endothelial	Endothelial - GNAI2	ADCY7 - Endothelial	human
Endothelial	Endothelial	GNAI2	ADCY8	GNAI2 - ADCY8	UNCAT	1.83571	NA	0.398451	NA	0.806344	NA	NA	NA	Endothelial - Endothelial	Endothelial - GNAI2 - ADCY8 - Endothelial	Endothelial - GNAI2	ADCY8 - Endothelial	human
Endothelial	Endothelial	GNAI2	ADCY9	GNAI2 - ADCY9	UNCAT	1.83571	0.0343286	0.398451	-0.0275921	0.806344	0.0143573	0.0630173	0.18543	Endothelial - Endothelial	Endothelial - GNAI2 - ADCY9 - Endothelial	Endothelial - GNAI2	ADCY9 - Endothelial	human
Endothelial	Endothelial	GNAI2	ADORA1	GNAI2 - ADORA1	UNCAT	1.83571	0.00360454	0.398451	-0.0680315	0.806344	0.000500835	0.00661687	0.16521	Endothelial - Endothelial	Endothelial - GNAI2 - ADORA1 - Endothelial	Endothelial - GNAI2	ADORA1 - Endothelial	human
Endothelial	Endothelial	GNAI2	ADRA2A	GNAI2 - ADRA2A	UNCAT	1.83571	NA	0.398451	NA	0.806344	NA	NA	NA	Endothelial - Endothelial	Endothelial - GNAI2 - ADRA2A - Endothelial	Endothelial - GNAI2	ADRA2A - Endothelial	human
Endothelial	Endothelial	GNAI2	ADRA2B	GNAI2 - ADRA2B	UNCAT	1.83571	NA	0.398451	NA	0.806344	NA	NA	NA	Endothelial - Endothelial	Endothelial - GNAI2 - ADRA2B - Endothelial	Endothelial - GNAI2	ADRA2B - Endothelial	human
Endothelial	Endothelial	GNAI2	AGTR2	GNAI2 - AGTR2	UNCAT	1.83571	NA	0.398451	NA	0.806344	NA	NA	NA	Endothelial - Endothelial	Endothelial - GNAI2 - AGTR2 - Endothelial	Endothelial - GNAI2	AGTR2 - Endothelial	human
Endothelial	Endothelial	GNAI2	C5AR1	GNAI2 - C5AR1	Complement	1.83571	0.00304265	0.398451	-0.0583637	0.806344	0.000500835	0.0055854	0.170044	Endothelial - Endothelial	Endothelial - GNAI2 - C5AR1 - Endothelial	Endothelial - GNAI2	C5AR1 - Endothelial	human
Endothelial	Endothelial	GNAI2	CAV1	GNAI2 - CAV1	UNCAT	1.83571	2.87609	0.398451	0.242337	0.806344	0.941402	5.27965	0.320394	Endothelial - Endothelial	Endothelial - GNAI2 - CAV1 - Endothelial	Endothelial - GNAI2	CAV1 - Endothelial	human
Endothelial	Endothelial	GNAI2	CCR5	GNAI2 - CCR5	CC	1.83571	NA	0.398451	NA	0.806344	NA	NA	NA	Endothelial - Endothelial	Endothelial - GNAI2 - CCR5 - Endothelial	Endothelial - GNAI2	CCR5 - Endothelial	human
Endothelial	Endothelial	GNAI2	CHRM1	GNAI2 - CHRM1	UNCAT	1.83571	NA	0.398451	NA	0.806344	NA	NA	NA	Endothelial - Endothelial	Endothelial - GNAI2 - CHRM1 - Endothelial	Endothelial - GNAI2	CHRM1 - Endothelial	human
Endothelial	Endothelial	GNAI2	CNR1	GNAI2 - CNR1	UNCAT	1.83571	0.00178582	0.398451	-0.0658828	0.806344	0.00100167	0.00327823	0.166284	Endothelial - Endothelial	Endothelial - GNAI2 - CNR1 - Endothelial	Endothelial - GNAI2	CNR1 - Endothelial	human
Endothelial	Endothelial	GNAI2	CXCR1	GNAI2 - CXCR1	UNCAT	1.83571	NA	0.398451	NA	0.806344	NA	NA	NA	Endothelial - Endothelial	Endothelial - GNAI2 - CXCR1 - Endothelial	Endothelial - GNAI2	CXCR1 - Endothelial	human
Endothelial	Endothelial	GNAI2	CXCR2	GNAI2 - CXCR2	UNCAT	1.83571	NA	0.398451	NA	0.806344	NA	NA	NA	Endothelial - Endothelial	Endothelial - GNAI2 - CXCR2 - Endothelial	Endothelial - GNAI2	CXCR2 - Endothelial	human
Endothelial	Endothelial	GNAI2	CXCR3	GNAI2 - CXCR3	UNCAT	1.83571	0	0.398451	-0.0523466	0.806344	0	0	0.173052	Endothelial - Endothelial	Endothelial - GNAI2 - CXCR3 - Endothelial	Endothelial - GNAI2	CXCR3 - Endothelial	human
Endothelial	Endothelial	GNAI2	DRD2	GNAI2 - DRD2	UNCAT	1.83571	NA	0.398451	NA	0.806344	NA	NA	NA	Endothelial - Endothelial	Endothelial - GNAI2 - DRD2 - Endothelial	Endothelial - GNAI2	DRD2 - Endothelial	human
Endothelial	Endothelial	GNAI2	EDNRA	GNAI2 - EDNRA	UNCAT	1.83571	0.0186949	0.398451	-0.166284	0.806344	0.0048414	0.0343184	0.116084	Endothelial - Endothelial	Endothelial - GNAI2 - EDNRA - Endothelial	Endothelial - GNAI2	EDNRA - Endothelial	human
Endothelial	Endothelial	GNAI2	EDNRB	GNAI2 - EDNRB	UNCAT	1.83571	0.164908	0.398451	0.158907	0.806344	0.0754591	0.302723	0.278679	Endothelial - Endothelial	Endothelial - GNAI2 - EDNRB - Endothelial	Endothelial - GNAI2	EDNRB - Endothelial	human
Endothelial	Endothelial	GNAI2	EGFR	GNAI2 - EGFR	EGF	1.83571	0.0549946	0.398451	-0.344129	0.806344	0.0245409	0.100954	0.027161	Endothelial - Endothelial	Endothelial - GNAI2 - EGFR - Endothelial	Endothelial - GNAI2	EGFR - Endothelial	human
Endothelial	Endothelial	GNAI2	F2R	GNAI2 - F2R	UNCAT	1.83571	1.13269	0.398451	0.301268	0.806344	0.551586	2.07928	0.34986	Endothelial - Endothelial	Endothelial - GNAI2 - F2R - Endothelial	Endothelial - GNAI2	F2R - Endothelial	human
Endothelial	Endothelial	GNAI2	FPR1	GNAI2 - FPR1	Chemotaxis	1.83571	0.00125578	0.398451	-0.0768494	0.806344	0.00066778	0.00230525	0.160801	Endothelial - Endothelial	Endothelial - GNAI2 - FPR1 - Endothelial	Endothelial - GNAI2	FPR1 - Endothelial	human
Endothelial	Endothelial	GNAI2	IGF1R	GNAI2 - IGF1R	UNCAT	1.83571	0.288791	0.398451	0.105434	0.806344	0.15192	0.530135	0.251943	Endothelial - Endothelial	Endothelial - GNAI2 - IGF1R - Endothelial	Endothelial - GNAI2	IGF1R - Endothelial	human
Endothelial	Endothelial	GNAI2	LHCGR	GNAI2 - LHCGR	UNCAT	1.83571	0	0.398451	0	0.806344	0	0	0.199226	Endothelial - Endothelial	Endothelial - GNAI2 - LHCGR - Endothelial	Endothelial - GNAI2	LHCGR - Endothelial	human
Endothelial	Endothelial	GNAI2	LPAR3	GNAI2 - LPAR3	UNCAT	1.83571	0.000401308	0.398451	-0.054356	0.806344	0.00033389	0.000736682	0.172048	Endothelial - Endothelial	Endothelial - GNAI2 - LPAR3 - Endothelial	Endothelial - GNAI2	LPAR3 - Endothelial	human
Endothelial	Endothelial	GNAI2	MTNR1A	GNAI2 - MTNR1A	UNCAT	1.83571	NA	0.398451	NA	0.806344	NA	NA	NA	Endothelial - Endothelial	Endothelial - GNAI2 - MTNR1A - Endothelial	Endothelial - GNAI2	MTNR1A - Endothelial	human
Endothelial	Endothelial	GNAI2	MTNR1B	GNAI2 - MTNR1B	UNCAT	1.83571	NA	0.398451	NA	0.806344	NA	NA	NA	Endothelial - Endothelial	Endothelial - GNAI2 - MTNR1B - Endothelial	Endothelial - GNAI2	MTNR1B - Endothelial	human
Endothelial	Endothelial	GNAI2	OPRD1	GNAI2 - OPRD1	UNCAT	1.83571	0	0.398451	-0.0155593	0.806344	0	0	0.191446	Endothelial - Endothelial	Endothelial - GNAI2 - OPRD1 - Endothelial	Endothelial - GNAI2	OPRD1 - Endothelial	human
Endothelial	Endothelial	GNAI2	OPRM1	GNAI2 - OPRM1	UNCAT	1.83571	8.75073e-05	0.398451	-0.0109284	0.806344	0.000166945	0.000160638	0.193762	Endothelial - Endothelial	Endothelial - GNAI2 - OPRM1 - Endothelial	Endothelial - GNAI2	OPRM1 - Endothelial	human
Endothelial	Endothelial	GNAI2	P2RY12	GNAI2 - P2RY12	UNCAT	1.83571	NA	0.398451	NA	0.806344	NA	NA	NA	Endothelial - Endothelial	Endothelial - GNAI2 - P2RY12 - Endothelial	Endothelial - GNAI2	P2RY12 - Endothelial	human
Endothelial	Endothelial	GNAI2	PTPRU	GNAI2 - PTPRU	UNCAT	1.83571	0.0202055	0.398451	-0.0719032	0.806344	0.0101836	0.0370914	0.163274	Endothelial - Endothelial	Endothelial - GNAI2 - PTPRU - Endothelial	Endothelial - GNAI2	PTPRU - Endothelial	human
Endothelial	Endothelial	GNAI2	S1PR1	GNAI2 - S1PR1	UNCAT	1.83571	0.728485	0.398451	0.399632	0.806344	0.388815	1.33728	0.399042	Endothelial - Endothelial	Endothelial - GNAI2 - S1PR1 - Endothelial	Endothelial - GNAI2	S1PR1 - Endothelial	human
Endothelial	Endothelial	GNAI2	S1PR3	GNAI2 - S1PR3	UNCAT	1.83571	0.0342491	0.398451	-0.186123	0.806344	0.0176962	0.0628713	0.106164	Endothelial - Endothelial	Endothelial - GNAI2 - S1PR3 - Endothelial	Endothelial - GNAI2	S1PR3 - Endothelial	human
Endothelial	Endothelial	GNAI2	S1PR4	GNAI2 - S1PR4	UNCAT	1.83571	0.0239248	0.398451	0.0300836	0.806344	0.0125209	0.0439189	0.214268	Endothelial - Endothelial	Endothelial - GNAI2 - S1PR4 - Endothelial	Endothelial - GNAI2	S1PR4 - Endothelial	human
Endothelial	Endothelial	GNAI2	S1PR5	GNAI2 - S1PR5	UNCAT	1.83571	0.000401037	0.398451	-0.0431236	0.806344	0.000166945	0.000736185	0.177664	Endothelial - Endothelial	Endothelial - GNAI2 - S1PR5 - Endothelial	Endothelial - GNAI2	S1PR5 - Endothelial	human
Endothelial	Endothelial	GNAI2	TBXA2R	GNAI2 - TBXA2R	UNCAT	1.83571	0.0214133	0.398451	-0.0172207	0.806344	0.0111853	0.0393084	0.190615	Endothelial - Endothelial	Endothelial - GNAI2 - TBXA2R - Endothelial	Endothelial - GNAI2	TBXA2R - Endothelial	human
Endothelial	Endothelial	GNAI2	TSHR	GNAI2 - TSHR	UNCAT	1.83571	0	0.398451	-0.0118532	0.806344	0	0	0.193299	Endothelial - Endothelial	Endothelial - GNAI2 - TSHR - Endothelial	Endothelial - GNAI2	TSHR - Endothelial	human
Endothelial	Endothelial	GNAI2	UNC5B	GNAI2 - UNC5B	UNCAT	1.83571	0.11448	0.398451	0.0168232	0.806344	0.0479132	0.210151	0.207637	Endothelial - Endothelial	Endothelial - GNAI2 - UNC5B - Endothelial	Endothelial - GNAI2	UNC5B - Endothelial	human
Endothelial	Endothelial	GNAS	ADCY1	GNAS - ADCY1	UNCAT	2.14844	0.00383875	0.0748564	-0.0164344	0.883472	0.00267112	0.00824734	0.029211	Endothelial - Endothelial	Endothelial - GNAS - ADCY1 - Endothelial	Endothelial - GNAS	ADCY1 - Endothelial	human
Endothelial	Endothelial	GNAS	ADCY7	GNAS - ADCY7	UNCAT	2.14844	0.00695832	0.0748564	-0.0423674	0.883472	0.00350584	0.0149496	0.0162445	Endothelial - Endothelial	Endothelial - GNAS - ADCY7 - Endothelial	Endothelial - GNAS	ADCY7 - Endothelial	human
Endothelial	Endothelial	GNAS	ADCY8	GNAS - ADCY8	UNCAT	2.14844	NA	0.0748564	NA	0.883472	NA	NA	NA	Endothelial - Endothelial	Endothelial - GNAS - ADCY8 - Endothelial	Endothelial - GNAS	ADCY8 - Endothelial	human
Endothelial	Endothelial	GNAS	ADCY9	GNAS - ADCY9	UNCAT	2.14844	0.0343286	0.0748564	-0.0275921	0.883472	0.0143573	0.0737532	0.0236321	Endothelial - Endothelial	Endothelial - GNAS - ADCY9 - Endothelial	Endothelial - GNAS	ADCY9 - Endothelial	human
Endothelial	Endothelial	GNAS	ADORA1	GNAS - ADORA1	UNCAT	2.14844	0.00360454	0.0748564	-0.0680315	0.883472	0.000500835	0.00774415	0.00341242	Endothelial - Endothelial	Endothelial - GNAS - ADORA1 - Endothelial	Endothelial - GNAS	ADORA1 - Endothelial	human
Endothelial	Endothelial	GNAS	ADRB3	GNAS - ADRB3	UNCAT	2.14844	NA	0.0748564	NA	0.883472	NA	NA	NA	Endothelial - Endothelial	Endothelial - GNAS - ADRB3 - Endothelial	Endothelial - GNAS	ADRB3 - Endothelial	human
Endothelial	Endothelial	GNAS	AVPR2	GNAS - AVPR2	UNCAT	2.14844	0.000742289	0.0748564	-0.0110401	0.883472	0.00033389	0.00159477	0.0319081	Endothelial - Endothelial	Endothelial - GNAS - AVPR2 - Endothelial	Endothelial - GNAS	AVPR2 - Endothelial	human
Endothelial	Endothelial	GNAS	CRHR1	GNAS - CRHR1	UNCAT	2.14844	NA	0.0748564	NA	0.883472	NA	NA	NA	Endothelial - Endothelial	Endothelial - GNAS - CRHR1 - Endothelial	Endothelial - GNAS	CRHR1 - Endothelial	human
Endothelial	Endothelial	GNAS	GCGR	GNAS - GCGR	UNCAT	2.14844	0	0.0748564	0	0.883472	0	0	0.0374282	Endothelial - Endothelial	Endothelial - GNAS - GCGR - Endothelial	Endothelial - GNAS	GCGR - Endothelial	human
Endothelial	Endothelial	GNAS	GLP1R	GNAS - GLP1R	UNCAT	2.14844	NA	0.0748564	NA	0.883472	NA	NA	NA	Endothelial - Endothelial	Endothelial - GNAS - GLP1R - Endothelial	Endothelial - GNAS	GLP1R - Endothelial	human
Endothelial	Endothelial	GNAS	HTR6	GNAS - HTR6	UNCAT	2.14844	0	0.0748564	-0.00907144	0.883472	0	0	0.0328925	Endothelial - Endothelial	Endothelial - GNAS - HTR6 - Endothelial	Endothelial - GNAS	HTR6 - Endothelial	human
Endothelial	Endothelial	GNAS	LHCGR	GNAS - LHCGR	UNCAT	2.14844	0	0.0748564	0	0.883472	0	0	0.0374282	Endothelial - Endothelial	Endothelial - GNAS - LHCGR - Endothelial	Endothelial - GNAS	LHCGR - Endothelial	human
Endothelial	Endothelial	GNAS	PTGDR	GNAS - PTGDR	UNCAT	2.14844	0.00129183	0.0748564	-0.0615871	0.883472	0.00033389	0.00277542	0.00663464	Endothelial - Endothelial	Endothelial - GNAS - PTGDR - Endothelial	Endothelial - GNAS	PTGDR - Endothelial	human
Endothelial	Endothelial	GNAS	PTGIR	GNAS - PTGIR	UNCAT	2.14844	0.0196	0.0748564	-0.122473	0.883472	0.00868114	0.0421094	-0.0238085	Endothelial - Endothelial	Endothelial - GNAS - PTGIR - Endothelial	Endothelial - GNAS	PTGIR - Endothelial	human
Endothelial	Endothelial	GNAS	TSHR	GNAS - TSHR	UNCAT	2.14844	0	0.0748564	-0.0118532	0.883472	0	0	0.0315016	Endothelial - Endothelial	Endothelial - GNAS - TSHR - Endothelial	Endothelial - GNAS	TSHR - Endothelial	human
Endothelial	Endothelial	GNAS	VIPR1	GNAS - VIPR1	UNCAT	2.14844	0.0167012	0.0748564	-0.0845654	0.883472	0.00734558	0.0358817	-0.00485452	Endothelial - Endothelial	Endothelial - GNAS - VIPR1 - Endothelial	Endothelial - GNAS	VIPR1 - Endothelial	human
Endothelial	Endothelial	GNB3	GABBR2	GNB3 - GABBR2	UNCAT	0.0165418	0.0617311	-0.00393459	0.0727617	0.00918197	0.0383973	0.00102114	0.0344135	Endothelial - Endothelial	Endothelial - GNB3 - GABBR2 - Endothelial	Endothelial - GNB3	GABBR2 - Endothelial	human
Endothelial	Endothelial	GNB3	TGFBR1	GNB3 - TGFBR1	UNCAT	0.0165418	0.0788557	-0.00393459	-0.0549375	0.00918197	0.0392321	0.00130441	-0.029436	Endothelial - Endothelial	Endothelial - GNB3 - TGFBR1 - Endothelial	Endothelial - GNB3	TGFBR1 - Endothelial	human
Endothelial	Endothelial	GNRH1	GNRHR	GNRH1 - GNRHR	UNCAT	0.022244	NA	0.00220659	NA	0.00868114	NA	NA	NA	Endothelial - Endothelial	Endothelial - GNRH1 - GNRHR - Endothelial	Endothelial - GNRH1	GNRHR - Endothelial	human
Endothelial	Endothelial	GNRH2	GNRHR	GNRH2 - GNRHR	UNCAT	NA	NA	NA	NA	NA	NA	NA	NA	Endothelial - Endothelial	Endothelial - GNRH2 - GNRHR - Endothelial	Endothelial - GNRH2	GNRHR - Endothelial	human
Endothelial	Endothelial	GPC3	CD81	GPC3 - CD81	Complement	0.000178917	1.67359	-0.100176	0.132003	0.000166945	0.767613	0.000299435	0.0159136	Endothelial - Endothelial	Endothelial - GPC3 - CD81 - Endothelial	Endothelial - GPC3	CD81 - Endothelial	human
Endothelial	Endothelial	GPC3	IGF1R	GPC3 - IGF1R	Complement	0.000178917	0.288791	-0.100176	0.105434	0.000166945	0.15192	5.16697e-05	0.00262912	Endothelial - Endothelial	Endothelial - GPC3 - IGF1R - Endothelial	Endothelial - GPC3	IGF1R - Endothelial	human
Endothelial	Endothelial	GPHA2	TSHR	GPHA2 - TSHR	UNCAT	0	0	-0.0176976	-0.0118532	0	0	0	-0.0147754	Endothelial - Endothelial	Endothelial - GPHA2 - TSHR - Endothelial	Endothelial - GPHA2	TSHR - Endothelial	human
Endothelial	Endothelial	GPI	AMFR	GPI - AMFR	Chemotaxis	0.434319	0.176057	-0.0387788	-0.0180797	0.235058	0.090818	0.0764648	-0.0284293	Endothelial - Endothelial	Endothelial - GPI - AMFR - Endothelial	Endothelial - GPI	AMFR - Endothelial	human
Endothelial	Endothelial	GREM1	KDR	GREM1 - KDR	UNCAT	0.180242	1.25924	-0.348629	0.499977	0.0617696	0.577629	0.226969	0.0756741	Endothelial - Endothelial	Endothelial - GREM1 - KDR - Endothelial	Endothelial - GREM1	KDR - Endothelial	human
Endothelial	Endothelial	GRP	BRS3	GRP - BRS3	UNCAT	NA	NA	NA	NA	NA	NA	NA	NA	Endothelial - Endothelial	Endothelial - GRP - BRS3 - Endothelial	Endothelial - GRP	BRS3 - Endothelial	human
Endothelial	Endothelial	GRP	GRPR	GRP - GRPR	UNCAT	NA	0.000802142	NA	-0.0128574	NA	0.00033389	NA	NA	Endothelial - Endothelial	Endothelial - GRP - GRPR - Endothelial	Endothelial - GRP	GRPR - Endothelial	human
Endothelial	Endothelial	GRP	NMBR	GRP - NMBR	UNCAT	NA	NA	NA	NA	NA	NA	NA	NA	Endothelial - Endothelial	Endothelial - GRP - NMBR - Endothelial	Endothelial - GRP	NMBR - Endothelial	human
Endothelial	Endothelial	GSTP1	TRAF2	GSTP1 - TRAF2	TNF	1.96877	0.0503888	-0.24151	-0.0346637	0.823205	0.0248748	0.0992038	-0.138087	Endothelial - Endothelial	Endothelial - GSTP1 - TRAF2 - Endothelial	Endothelial - GSTP1	TRAF2 - Endothelial	human
Endothelial	Endothelial	GUCA2A	GUCY2C	GUCA2A - GUCY2C	UNCAT	0	0	0	0	0	0	0	0	Endothelial - Endothelial	Endothelial - GUCA2A - GUCY2C - Endothelial	Endothelial - GUCA2A	GUCY2C - Endothelial	human
Endothelial	Endothelial	GUCA2B	GUCY2C	GUCA2B - GUCY2C	UNCAT	NA	0	NA	0	NA	0	NA	NA	Endothelial - Endothelial	Endothelial - GUCA2B - GUCY2C - Endothelial	Endothelial - GUCA2B	GUCY2C - Endothelial	human
Endothelial	Endothelial	GUCA2B	GUCY2D	GUCA2B - GUCY2D	UNCAT	NA	0.000478179	NA	-0.0235126	NA	0.00033389	NA	NA	Endothelial - Endothelial	Endothelial - GUCA2B - GUCY2D - Endothelial	Endothelial - GUCA2B	GUCY2D - Endothelial	human
Endothelial	Endothelial	GZMB	CHRM3	GZMB - CHRM3	UNCAT	NA	NA	NA	NA	NA	NA	NA	NA	Endothelial - Endothelial	Endothelial - GZMB - CHRM3 - Endothelial	Endothelial - GZMB	CHRM3 - Endothelial	human
Endothelial	Endothelial	GZMB	IGF2R	GZMB - IGF2R	UNCAT	NA	0.402217	NA	-0.0097744	NA	0.192654	NA	NA	Endothelial - Endothelial	Endothelial - GZMB - IGF2R - Endothelial	Endothelial - GZMB	IGF2R - Endothelial	human
Endothelial	Endothelial	GZMB	PGRMC1	GZMB - PGRMC1	UNCAT	NA	0.395534	NA	-0.0866508	NA	0.214858	NA	NA	Endothelial - Endothelial	Endothelial - GZMB - PGRMC1 - Endothelial	Endothelial - GZMB	PGRMC1 - Endothelial	human
Endothelial	Endothelial	HAS2	CD44	HAS2 - CD44	Matrix (assorted)	0.072377	0.205523	-0.326275	-0.300826	0.0220367	0.100167	0.0148752	-0.31355	Endothelial - Endothelial	Endothelial - HAS2 - CD44 - Endothelial	Endothelial - HAS2	CD44 - Endothelial	human
Endothelial	Endothelial	HAS2	HMMR	HAS2 - HMMR	Matrix (assorted)	0.072377	0.136533	-0.326275	-0.215912	0.0220367	0.051586	0.00988189	-0.271093	Endothelial - Endothelial	Endothelial - HAS2 - HMMR - Endothelial	Endothelial - HAS2	HMMR - Endothelial	human
Endothelial	Endothelial	HBEGF	CD44	HBEGF - CD44	EGF	0.275049	0.205523	0.128366	-0.300826	0.135559	0.100167	0.0565289	-0.0862296	Endothelial - Endothelial	Endothelial - HBEGF - CD44 - Endothelial	Endothelial - HBEGF	CD44 - Endothelial	human
Endothelial	Endothelial	HBEGF	CD82	HBEGF - CD82	EGF	0.275049	0.142033	0.128366	-0.163964	0.135559	0.0751252	0.039066	-0.0177987	Endothelial - Endothelial	Endothelial - HBEGF - CD82 - Endothelial	Endothelial - HBEGF	CD82 - Endothelial	human
Endothelial	Endothelial	HBEGF	CD9	HBEGF - CD9	EGF	0.275049	1.02592	0.128366	-0.107664	0.135559	0.43172	0.282179	0.0103511	Endothelial - Endothelial	Endothelial - HBEGF - CD9 - Endothelial	Endothelial - HBEGF	CD9 - Endothelial	human
Endothelial	Endothelial	HBEGF	EGFR	HBEGF - EGFR	EGF	0.275049	0.0549946	0.128366	-0.344129	0.135559	0.0245409	0.0151262	-0.107881	Endothelial - Endothelial	Endothelial - HBEGF - EGFR - Endothelial	Endothelial - HBEGF	EGFR - Endothelial	human
Endothelial	Endothelial	HBEGF	ERBB2	HBEGF - ERBB2	EGF	0.275049	0.0217755	0.128366	-0.180314	0.135559	0.00984975	0.00598931	-0.0259738	Endothelial - Endothelial	Endothelial - HBEGF - ERBB2 - Endothelial	Endothelial - HBEGF	ERBB2 - Endothelial	human
Endothelial	Endothelial	HBEGF	ERBB4	HBEGF - ERBB4	EGF	0.275049	0.000546417	0.128366	-0.0180449	0.135559	0.00033389	0.000150291	0.0551608	Endothelial - Endothelial	Endothelial - HBEGF - ERBB4 - Endothelial	Endothelial - HBEGF	ERBB4 - Endothelial	human
Endothelial	Endothelial	HBEGF	PRLR	HBEGF - PRLR	EGF	0.275049	0	0.128366	-0.0367739	0.135559	0	0	0.0457963	Endothelial - Endothelial	Endothelial - HBEGF - PRLR - Endothelial	Endothelial - HBEGF	PRLR - Endothelial	human
Endothelial	Endothelial	HCRT	HCRTR1	HCRT - HCRTR1	UNCAT	0.000466252	0.000543674	-0.0159415	-0.0089747	0.00033389	0.00033389	2.53489e-07	-0.0124581	Endothelial - Endothelial	Endothelial - HCRT - HCRTR1 - Endothelial	Endothelial - HCRT	HCRTR1 - Endothelial	human
Endothelial	Endothelial	HCRT	HCRTR2	HCRT - HCRTR2	UNCAT	0.000466252	NA	-0.0159415	NA	0.00033389	NA	NA	NA	Endothelial - Endothelial	Endothelial - HCRT - HCRTR2 - Endothelial	Endothelial - HCRT	HCRTR2 - Endothelial	human
Endothelial	Endothelial	HCRT	NPFFR2	HCRT - NPFFR2	UNCAT	0.000466252	0.00102799	-0.0159415	-0.0110223	0.00033389	0.00066778	4.79305e-07	-0.0134819	Endothelial - Endothelial	Endothelial - HCRT - NPFFR2 - Endothelial	Endothelial - HCRT	NPFFR2 - Endothelial	human
Endothelial	Endothelial	HEBP1	FPR3	HEBP1 - FPR3	UNCAT	0.507535	NA	0.0625027	NA	0.277295	NA	NA	NA	Endothelial - Endothelial	Endothelial - HEBP1 - FPR3 - Endothelial	Endothelial - HEBP1	FPR3 - Endothelial	human
Endothelial	Endothelial	HGF	CD44	HGF - CD44	UNCAT	0.0871991	0.205523	-0.0148391	-0.300826	0.0340568	0.100167	0.0179215	-0.157832	Endothelial - Endothelial	Endothelial - HGF - CD44 - Endothelial	Endothelial - HGF	CD44 - Endothelial	human
Endothelial	Endothelial	HGF	MET	HGF - MET	MET	0.0871991	0.465896	-0.0148391	-0.11602	0.0340568	0.238063	0.0406257	-0.0654293	Endothelial - Endothelial	Endothelial - HGF - MET - Endothelial	Endothelial - HGF	MET - Endothelial	human
Endothelial	Endothelial	HGF	SDC1	HGF - SDC1	UNCAT	0.0871991	0.0350433	-0.0148391	-0.278519	0.0340568	0.0128548	0.00305574	-0.146679	Endothelial - Endothelial	Endothelial - HGF - SDC1 - Endothelial	Endothelial - HGF	SDC1 - Endothelial	human
Endothelial	Endothelial	HGF	SDC2	HGF - SDC2	UNCAT	0.0871991	0.0328693	-0.0148391	-0.223341	0.0340568	0.0148581	0.00286618	-0.11909	Endothelial - Endothelial	Endothelial - HGF - SDC2 - Endothelial	Endothelial - HGF	SDC2 - Endothelial	human
Endothelial	Endothelial	HGF	ST14	HGF - ST14	UNCAT	0.0871991	0.0351557	-0.0148391	-0.264748	0.0340568	0.0106845	0.00306555	-0.139794	Endothelial - Endothelial	Endothelial - HGF - ST14 - Endothelial	Endothelial - HGF	ST14 - Endothelial	human
Endothelial	Endothelial	HHIPL2	CACHD1	HHIPL2 - CACHD1	UNCAT	0.00123383	0.0930769	-0.05923	0.111117	0.00066778	0.0442404	0.000114841	0.0259435	Endothelial - Endothelial	Endothelial - HHIPL2 - CACHD1 - Endothelial	Endothelial - HHIPL2	CACHD1 - Endothelial	human
Endothelial	Endothelial	HHLA3	CHRM3	HHLA3 - CHRM3	UNCAT	0.0466676	NA	-0.138309	NA	0.0222037	NA	NA	NA	Endothelial - Endothelial	Endothelial - HHLA3 - CHRM3 - Endothelial	Endothelial - HHLA3	CHRM3 - Endothelial	human
Endothelial	Endothelial	HLA-A	APLP2	HLA-A - APLP2	MHC	1.76493	1.88793	0.28616	0.288923	0.764608	0.805509	3.33205	0.287542	Endothelial - Endothelial	Endothelial - HLA-A - APLP2 - Endothelial	Endothelial - HLA-A	APLP2 - Endothelial	human
Endothelial	Endothelial	HLA-A	CD3D	HLA-A - CD3D	MHC	1.76493	0	0.28616	-0.00907144	0.764608	0	0	0.138545	Endothelial - Endothelial	Endothelial - HLA-A - CD3D - Endothelial	Endothelial - HLA-A	CD3D - Endothelial	human
Endothelial	Endothelial	HLA-A	CD3G	HLA-A - CD3G	MHC	1.76493	NA	0.28616	NA	0.764608	NA	NA	NA	Endothelial - Endothelial	Endothelial - HLA-A - CD3G - Endothelial	Endothelial - HLA-A	CD3G - Endothelial	human
Endothelial	Endothelial	HLA-A	ERBB2	HLA-A - ERBB2	MHC	1.76493	0.0217755	0.28616	-0.180314	0.764608	0.00984975	0.0384321	0.0529232	Endothelial - Endothelial	Endothelial - HLA-A - ERBB2 - Endothelial	Endothelial - HLA-A	ERBB2 - Endothelial	human
Endothelial	Endothelial	HLA-A	KIR2DL1	HLA-A - KIR2DL1	MHC	1.76493	NA	0.28616	NA	0.764608	NA	NA	NA	Endothelial - Endothelial	Endothelial - HLA-A - KIR2DL1 - Endothelial	Endothelial - HLA-A	KIR2DL1 - Endothelial	human
Endothelial	Endothelial	HLA-A	KIR2DL3	HLA-A - KIR2DL3	MHC	1.76493	NA	0.28616	NA	0.764608	NA	NA	NA	Endothelial - Endothelial	Endothelial - HLA-A - KIR2DL3 - Endothelial	Endothelial - HLA-A	KIR2DL3 - Endothelial	human
Endothelial	Endothelial	HLA-A	KIR3DL1	HLA-A - KIR3DL1	MHC	1.76493	NA	0.28616	NA	0.764608	NA	NA	NA	Endothelial - Endothelial	Endothelial - HLA-A - KIR3DL1 - Endothelial	Endothelial - HLA-A	KIR3DL1 - Endothelial	human
Endothelial	Endothelial	HLA-A	KIR3DL2	HLA-A - KIR3DL2	MHC	1.76493	NA	0.28616	NA	0.764608	NA	NA	NA	Endothelial - Endothelial	Endothelial - HLA-A - KIR3DL2 - Endothelial	Endothelial - HLA-A	KIR3DL2 - Endothelial	human
Endothelial	Endothelial	HLA-A	LILRB1	HLA-A - LILRB1	MHC	1.76493	0.00149347	0.28616	-0.0122998	0.764608	0.00116861	0.00263587	0.13693	Endothelial - Endothelial	Endothelial - HLA-A - LILRB1 - Endothelial	Endothelial - HLA-A	LILRB1 - Endothelial	human
Endothelial	Endothelial	HLA-A	LILRB2	HLA-A - LILRB2	MHC	1.76493	NA	0.28616	NA	0.764608	NA	NA	NA	Endothelial - Endothelial	Endothelial - HLA-A - LILRB2 - Endothelial	Endothelial - HLA-A	LILRB2 - Endothelial	human
Endothelial	Endothelial	HLA-B	CANX	HLA-B - CANX	MHC	1.40121	1.62169	0.218739	0.288609	0.610017	0.745409	2.27232	0.253674	Endothelial - Endothelial	Endothelial - HLA-B - CANX - Endothelial	Endothelial - HLA-B	CANX - Endothelial	human
Endothelial	Endothelial	HLA-B	CD3D	HLA-B - CD3D	MHC	1.40121	0	0.218739	-0.00907144	0.610017	0	0	0.104834	Endothelial - Endothelial	Endothelial - HLA-B - CD3D - Endothelial	Endothelial - HLA-B	CD3D - Endothelial	human
Endothelial	Endothelial	HLA-B	CD3G	HLA-B - CD3G	MHC	1.40121	NA	0.218739	NA	0.610017	NA	NA	NA	Endothelial - Endothelial	Endothelial - HLA-B - CD3G - Endothelial	Endothelial - HLA-B	CD3G - Endothelial	human
Endothelial	Endothelial	HLA-B	KIR2DL3	HLA-B - KIR2DL3	MHC	1.40121	NA	0.218739	NA	0.610017	NA	NA	NA	Endothelial - Endothelial	Endothelial - HLA-B - KIR2DL3 - Endothelial	Endothelial - HLA-B	KIR2DL3 - Endothelial	human
Endothelial	Endothelial	HLA-B	KIR3DL1	HLA-B - KIR3DL1	MHC	1.40121	NA	0.218739	NA	0.610017	NA	NA	NA	Endothelial - Endothelial	Endothelial - HLA-B - KIR3DL1 - Endothelial	Endothelial - HLA-B	KIR3DL1 - Endothelial	human
Endothelial	Endothelial	HLA-B	KLRD1	HLA-B - KLRD1	MHC	1.40121	0.00654194	0.218739	-0.0149444	0.610017	0.00283806	0.0091666	0.101897	Endothelial - Endothelial	Endothelial - HLA-B - KLRD1 - Endothelial	Endothelial - HLA-B	KLRD1 - Endothelial	human
Endothelial	Endothelial	HLA-B	LILRB1	HLA-B - LILRB1	MHC	1.40121	0.00149347	0.218739	-0.0122998	0.610017	0.00116861	0.00209266	0.10322	Endothelial - Endothelial	Endothelial - HLA-B - LILRB1 - Endothelial	Endothelial - HLA-B	LILRB1 - Endothelial	human
Endothelial	Endothelial	HLA-B	LILRB2	HLA-B - LILRB2	MHC	1.40121	NA	0.218739	NA	0.610017	NA	NA	NA	Endothelial - Endothelial	Endothelial - HLA-B - LILRB2 - Endothelial	Endothelial - HLA-B	LILRB2 - Endothelial	human
Endothelial	Endothelial	HLA-C	CD3D	HLA-C - CD3D	MHC	1.29762	0	0.264951	-0.00907144	0.614023	0	0	0.12794	Endothelial - Endothelial	Endothelial - HLA-C - CD3D - Endothelial	Endothelial - HLA-C	CD3D - Endothelial	human
Endothelial	Endothelial	HLA-C	CD3G	HLA-C - CD3G	MHC	1.29762	NA	0.264951	NA	0.614023	NA	NA	NA	Endothelial - Endothelial	Endothelial - HLA-C - CD3G - Endothelial	Endothelial - HLA-C	CD3G - Endothelial	human
Endothelial	Endothelial	HLA-C	DDR1	HLA-C - DDR1	MHC	1.29762	0.04846	0.264951	-0.170533	0.614023	0.0228715	0.0628825	0.0472088	Endothelial - Endothelial	Endothelial - HLA-C - DDR1 - Endothelial	Endothelial - HLA-C	DDR1 - Endothelial	human
Endothelial	Endothelial	HLA-C	KIR2DL1	HLA-C - KIR2DL1	MHC	1.29762	NA	0.264951	NA	0.614023	NA	NA	NA	Endothelial - Endothelial	Endothelial - HLA-C - KIR2DL1 - Endothelial	Endothelial - HLA-C	KIR2DL1 - Endothelial	human
Endothelial	Endothelial	HLA-C	KIR2DL3	HLA-C - KIR2DL3	MHC	1.29762	NA	0.264951	NA	0.614023	NA	NA	NA	Endothelial - Endothelial	Endothelial - HLA-C - KIR2DL3 - Endothelial	Endothelial - HLA-C	KIR2DL3 - Endothelial	human
Endothelial	Endothelial	HLA-C	KIR2DS4	HLA-C - KIR2DS4	MHC	1.29762	NA	0.264951	NA	0.614023	NA	NA	NA	Endothelial - Endothelial	Endothelial - HLA-C - KIR2DS4 - Endothelial	Endothelial - HLA-C	KIR2DS4 - Endothelial	human
Endothelial	Endothelial	HLA-C	KIR3DL1	HLA-C - KIR3DL1	MHC	1.29762	NA	0.264951	NA	0.614023	NA	NA	NA	Endothelial - Endothelial	Endothelial - HLA-C - KIR3DL1 - Endothelial	Endothelial - HLA-C	KIR3DL1 - Endothelial	human
Endothelial	Endothelial	HLA-C	LILRA3	HLA-C - LILRA3	MHC	1.29762	NA	0.264951	NA	0.614023	NA	NA	NA	Endothelial - Endothelial	Endothelial - HLA-C - LILRA3 - Endothelial	Endothelial - HLA-C	LILRA3 - Endothelial	human
Endothelial	Endothelial	HLA-C	LILRB1	HLA-C - LILRB1	MHC	1.29762	0.00149347	0.264951	-0.0122998	0.614023	0.00116861	0.00193796	0.126326	Endothelial - Endothelial	Endothelial - HLA-C - LILRB1 - Endothelial	Endothelial - HLA-C	LILRB1 - Endothelial	human
Endothelial	Endothelial	HLA-C	LILRB2	HLA-C - LILRB2	MHC	1.29762	NA	0.264951	NA	0.614023	NA	NA	NA	Endothelial - Endothelial	Endothelial - HLA-C - LILRB2 - Endothelial	Endothelial - HLA-C	LILRB2 - Endothelial	human
Endothelial	Endothelial	HLA-C	NOTCH4	HLA-C - NOTCH4	NOTCH	1.29762	0.648718	0.264951	0.315057	0.614023	0.295659	0.841788	0.290004	Endothelial - Endothelial	Endothelial - HLA-C - NOTCH4 - Endothelial	Endothelial - HLA-C	NOTCH4 - Endothelial	human
Endothelial	Endothelial	HLA-C	SLC9C2	HLA-C - SLC9C2	MHC	1.29762	0	0.264951	0	0.614023	0	0	0.132475	Endothelial - Endothelial	Endothelial - HLA-C - SLC9C2 - Endothelial	Endothelial - HLA-C	SLC9C2 - Endothelial	human
Endothelial	Endothelial	HLA-E	KIR3DL1	HLA-E - KIR3DL1	MHC	1.45485	NA	0.463902	NA	0.695826	NA	NA	NA	Endothelial - Endothelial	Endothelial - HLA-E - KIR3DL1 - Endothelial	Endothelial - HLA-E	KIR3DL1 - Endothelial	human
Endothelial	Endothelial	HLA-E	KLRC1	HLA-E - KLRC1	MHC	1.45485	0.00125538	0.463902	-0.0441439	0.695826	0.000166945	0.00182639	0.209879	Endothelial - Endothelial	Endothelial - HLA-E - KLRC1 - Endothelial	Endothelial - HLA-E	KLRC1 - Endothelial	human
Endothelial	Endothelial	HLA-E	KLRC2	HLA-E - KLRC2	MHC	1.45485	0	0.463902	-0.0262164	0.695826	0	0	0.218843	Endothelial - Endothelial	Endothelial - HLA-E - KLRC2 - Endothelial	Endothelial - HLA-E	KLRC2 - Endothelial	human
Endothelial	Endothelial	HLA-E	KLRD1	HLA-E - KLRD1	MHC	1.45485	0.00654194	0.463902	-0.0149444	0.695826	0.00283806	0.00951752	0.224479	Endothelial - Endothelial	Endothelial - HLA-E - KLRD1 - Endothelial	Endothelial - HLA-E	KLRD1 - Endothelial	human
Endothelial	Endothelial	HLA-E	SLC16A4	HLA-E - SLC16A4	MHC	1.45485	0.0594488	0.463902	-0.0233315	0.695826	0.0292154	0.0864889	0.220285	Endothelial - Endothelial	Endothelial - HLA-E - SLC16A4 - Endothelial	Endothelial - HLA-E	SLC16A4 - Endothelial	human
Endothelial	Endothelial	HLA-G	CD4	HLA-G - CD4	MHC	0.00343935	0.00994187	-0.03056	-0.158794	0.00217028	0.00300501	3.41936e-05	-0.094677	Endothelial - Endothelial	Endothelial - HLA-G - CD4 - Endothelial	Endothelial - HLA-G	CD4 - Endothelial	human
Endothelial	Endothelial	HLA-G	KIR2DL4	HLA-G - KIR2DL4	MHC	0.00343935	NA	-0.03056	NA	0.00217028	NA	NA	NA	Endothelial - Endothelial	Endothelial - HLA-G - KIR2DL4 - Endothelial	Endothelial - HLA-G	KIR2DL4 - Endothelial	human
Endothelial	Endothelial	HLA-G	KLRC1	HLA-G - KLRC1	MHC	0.00343935	0.00125538	-0.03056	-0.0441439	0.00217028	0.000166945	4.3177e-06	-0.037352	Endothelial - Endothelial	Endothelial - HLA-G - KLRC1 - Endothelial	Endothelial - HLA-G	KLRC1 - Endothelial	human
Endothelial	Endothelial	HLA-G	KLRD1	HLA-G - KLRD1	MHC	0.00343935	0.00654194	-0.03056	-0.0149444	0.00217028	0.00283806	2.25e-05	-0.0227522	Endothelial - Endothelial	Endothelial - HLA-G - KLRD1 - Endothelial	Endothelial - HLA-G	KLRD1 - Endothelial	human
Endothelial	Endothelial	HLA-G	LILRB1	HLA-G - LILRB1	MHC	0.00343935	0.00149347	-0.03056	-0.0122998	0.00217028	0.00116861	5.13658e-06	-0.0214299	Endothelial - Endothelial	Endothelial - HLA-G - LILRB1 - Endothelial	Endothelial - HLA-G	LILRB1 - Endothelial	human
Endothelial	Endothelial	HLA-G	LILRB2	HLA-G - LILRB2	MHC	0.00343935	NA	-0.03056	NA	0.00217028	NA	NA	NA	Endothelial - Endothelial	Endothelial - HLA-G - LILRB2 - Endothelial	Endothelial - HLA-G	LILRB2 - Endothelial	human
Endothelial	Endothelial	HMGB1	SDC1	HMGB1 - SDC1	UNCAT	2.48752	0.0350433	0.0797984	-0.278519	0.919866	0.0128548	0.0871709	-0.0993602	Endothelial - Endothelial	Endothelial - HMGB1 - SDC1 - Endothelial	Endothelial - HMGB1	SDC1 - Endothelial	human
Endothelial	Endothelial	HMGB1	THBD	HMGB1 - THBD	Vasoactive	2.48752	0.355538	0.0797984	0.23355	0.919866	0.152588	0.884407	0.156674	Endothelial - Endothelial	Endothelial - HMGB1 - THBD - Endothelial	Endothelial - HMGB1	THBD - Endothelial	human
Endothelial	Endothelial	HP	ASGR1	HP - ASGR1	UNCAT	0.0129511	0.118164	-0.0797208	0.121588	0.00417362	0.0616027	0.00153035	0.0209338	Endothelial - Endothelial	Endothelial - HP - ASGR1 - Endothelial	Endothelial - HP	ASGR1 - Endothelial	human
Endothelial	Endothelial	HP	ASGR2	HP - ASGR2	UNCAT	0.0129511	0	-0.0797208	-0.0127811	0.00417362	0	0	-0.046251	Endothelial - Endothelial	Endothelial - HP - ASGR2 - Endothelial	Endothelial - HP	ASGR2 - Endothelial	human
Endothelial	Endothelial	HP	ITGAM	HP - ITGAM	UNCAT	0.0129511	0.000220423	-0.0797208	-0.0131065	0.00417362	0.000166945	2.85472e-06	-0.0464137	Endothelial - Endothelial	Endothelial - HP - ITGAM - Endothelial	Endothelial - HP	ITGAM - Endothelial	human
Endothelial	Endothelial	HP	ITGB2	HP - ITGB2	UNCAT	0.0129511	0.0111766	-0.0797208	-0.176937	0.00417362	0.00417362	0.000144749	-0.128329	Endothelial - Endothelial	Endothelial - HP - ITGB2 - Endothelial	Endothelial - HP	ITGB2 - Endothelial	human
Endothelial	Endothelial	HRAS	AGTR1	HRAS - AGTR1	UNCAT	0.459391	0.000569991	-0.104155	-0.0750378	0.251419	0.00066778	0.000261849	-0.0895962	Endothelial - Endothelial	Endothelial - HRAS - AGTR1 - Endothelial	Endothelial - HRAS	AGTR1 - Endothelial	human
Endothelial	Endothelial	HRAS	CAV1	HRAS - CAV1	UNCAT	0.459391	2.87609	-0.104155	0.242337	0.251419	0.941402	1.32125	0.0690913	Endothelial - Endothelial	Endothelial - HRAS - CAV1 - Endothelial	Endothelial - HRAS	CAV1 - Endothelial	human
Endothelial	Endothelial	HRAS	GRIN2D	HRAS - GRIN2D	UNCAT	0.459391	0.00903473	-0.104155	-0.0318444	0.251419	0.00467446	0.00415048	-0.0679995	Endothelial - Endothelial	Endothelial - HRAS - GRIN2D - Endothelial	Endothelial - HRAS	GRIN2D - Endothelial	human
Endothelial	Endothelial	HRAS	INSR	HRAS - INSR	UNCAT	0.459391	0.753284	-0.104155	0.254728	0.251419	0.275626	0.346052	0.0752867	Endothelial - Endothelial	Endothelial - HRAS - INSR - Endothelial	Endothelial - HRAS	INSR - Endothelial	human
Endothelial	Endothelial	HRAS	SDC2	HRAS - SDC2	UNCAT	0.459391	0.0328693	-0.104155	-0.223341	0.251419	0.0148581	0.0150999	-0.163748	Endothelial - Endothelial	Endothelial - HRAS - SDC2 - Endothelial	Endothelial - HRAS	SDC2 - Endothelial	human
Endothelial	Endothelial	HRAS	TLR2	HRAS - TLR2	TLR	0.459391	0.00094069	-0.104155	-0.0934479	0.251419	0.000500835	0.000432145	-0.0988013	Endothelial - Endothelial	Endothelial - HRAS - TLR2 - Endothelial	Endothelial - HRAS	TLR2 - Endothelial	human
Endothelial	Endothelial	HRAS	TLR9	HRAS - TLR9	TLR	0.459391	0	-0.104155	-0.0149195	0.251419	0	0	-0.0595371	Endothelial - Endothelial	Endothelial - HRAS - TLR9 - Endothelial	Endothelial - HRAS	TLR9 - Endothelial	human
Endothelial	Endothelial	HRG	FCGR1A	HRG - FCGR1A	UNCAT	0	NA	-0.0123956	NA	0	NA	NA	NA	Endothelial - Endothelial	Endothelial - HRG - FCGR1A - Endothelial	Endothelial - HRG	FCGR1A - Endothelial	human
Endothelial	Endothelial	HSP90AA1	CFTR	HSP90AA1 - CFTR	UNCAT	2.24217	0.000248251	-0.24198	-0.0248303	0.892988	0.000166945	0.000556621	-0.133405	Endothelial - Endothelial	Endothelial - HSP90AA1 - CFTR - Endothelial	Endothelial - HSP90AA1	CFTR - Endothelial	human
Endothelial	Endothelial	HSP90AA1	EGFR	HSP90AA1 - EGFR	EGF	2.24217	0.0549946	-0.24198	-0.344129	0.892988	0.0245409	0.123307	-0.293055	Endothelial - Endothelial	Endothelial - HSP90AA1 - EGFR - Endothelial	Endothelial - HSP90AA1	EGFR - Endothelial	human
Endothelial	Endothelial	HSP90AA1	FGFR3	HSP90AA1 - FGFR3	FGF	2.24217	0.00429041	-0.24198	-0.0158444	0.892988	0.00233723	0.00961982	-0.128912	Endothelial - Endothelial	Endothelial - HSP90AA1 - FGFR3 - Endothelial	Endothelial - HSP90AA1	FGFR3 - Endothelial	human
Endothelial	Endothelial	HSPG2	CHRM3	HSPG2 - CHRM3	Matrix glycoproteins	2.16328	NA	0.700821	NA	0.856093	NA	NA	NA	Endothelial - Endothelial	Endothelial - HSPG2 - CHRM3 - Endothelial	Endothelial - HSPG2	CHRM3 - Endothelial	human
Endothelial	Endothelial	HSPG2	COL13A1	HSPG2 - COL13A1	Matrix glycoproteins	2.16328	0.0598719	0.700821	-0.0950567	0.856093	0.0370618	0.129519	0.302882	Endothelial - Endothelial	Endothelial - HSPG2 - COL13A1 - Endothelial	Endothelial - HSPG2	COL13A1 - Endothelial	human
Endothelial	Endothelial	HSPG2	ITGA2	HSPG2 - ITGA2	Matrix glycoproteins	2.16328	0.759539	0.700821	0.0792726	0.856093	0.376294	1.64309	0.390047	Endothelial - Endothelial	Endothelial - HSPG2 - ITGA2 - Endothelial	Endothelial - HSPG2	ITGA2 - Endothelial	human
Endothelial	Endothelial	HSPG2	ITGB1	HSPG2 - ITGB1	Matrix glycoproteins	2.16328	2.24898	0.700821	0.131115	0.856093	0.894825	4.86517	0.415968	Endothelial - Endothelial	Endothelial - HSPG2 - ITGB1 - Endothelial	Endothelial - HSPG2	ITGB1 - Endothelial	human
Endothelial	Endothelial	HSPG2	PTPRS	HSPG2 - PTPRS	Matrix glycoproteins	2.16328	0.0190144	0.700821	-0.0546737	0.856093	0.00868114	0.0411333	0.323074	Endothelial - Endothelial	Endothelial - HSPG2 - PTPRS - Endothelial	Endothelial - HSPG2	PTPRS - Endothelial	human
Endothelial	Endothelial	HSPG2	SDC1	HSPG2 - SDC1	Matrix glycoproteins	2.16328	0.0350433	0.700821	-0.278519	0.856093	0.0128548	0.0758083	0.211151	Endothelial - Endothelial	Endothelial - HSPG2 - SDC1 - Endothelial	Endothelial - HSPG2	SDC1 - Endothelial	human
Endothelial	Endothelial	IAPP	CALCR	IAPP - CALCR	UNCAT	0.000108477	NA	-0.00740047	NA	0.000166945	NA	NA	NA	Endothelial - Endothelial	Endothelial - IAPP - CALCR - Endothelial	Endothelial - IAPP	CALCR - Endothelial	human
Endothelial	Endothelial	IAPP	RAMP1	IAPP - RAMP1	UNCAT	0.000108477	0.0194183	-0.00740047	-0.286244	0.000166945	0.00767947	2.10644e-06	-0.146822	Endothelial - Endothelial	Endothelial - IAPP - RAMP1 - Endothelial	Endothelial - IAPP	RAMP1 - Endothelial	human
Endothelial	Endothelial	IAPP	RAMP2	IAPP - RAMP2	UNCAT	0.000108477	1.56596	-0.00740047	0.612675	0.000166945	0.701669	0.000169872	0.302637	Endothelial - Endothelial	Endothelial - IAPP - RAMP2 - Endothelial	Endothelial - IAPP	RAMP2 - Endothelial	human
Endothelial	Endothelial	IAPP	RAMP3	IAPP - RAMP3	UNCAT	0.000108477	0.000825359	-0.00740047	-0.0106696	0.000166945	0.000500835	8.95328e-08	-0.00903504	Endothelial - Endothelial	Endothelial - IAPP - RAMP3 - Endothelial	Endothelial - IAPP	RAMP3 - Endothelial	human
Endothelial	Endothelial	IBSP	ITGAV	IBSP - ITGAV	UNCAT	0.00020107	0.857661	-0.0195791	0.117173	0.000166945	0.425543	0.00017245	0.0487967	Endothelial - Endothelial	Endothelial - IBSP - ITGAV - Endothelial	Endothelial - IBSP	ITGAV - Endothelial	human
Endothelial	Endothelial	ICAM1	CAV1	ICAM1 - CAV1	Cell-cell adhesion	0.558814	2.87609	-0.00601607	0.242337	0.221035	0.941402	1.6072	0.118161	Endothelial - Endothelial	Endothelial - ICAM1 - CAV1 - Endothelial	Endothelial - ICAM1	CAV1 - Endothelial	human
Endothelial	Endothelial	ICAM1	EGFR	ICAM1 - EGFR	EGF	0.558814	0.0549946	-0.00601607	-0.344129	0.221035	0.0245409	0.0307318	-0.175073	Endothelial - Endothelial	Endothelial - ICAM1 - EGFR - Endothelial	Endothelial - ICAM1	EGFR - Endothelial	human
Endothelial	Endothelial	ICAM1	IL2RA	ICAM1 - IL2RA	Cell-cell adhesion	0.558814	NA	-0.00601607	NA	0.221035	NA	NA	NA	Endothelial - Endothelial	Endothelial - ICAM1 - IL2RA - Endothelial	Endothelial - ICAM1	IL2RA - Endothelial	human
Endothelial	Endothelial	ICAM1	IL2RG	ICAM1 - IL2RG	Cell-cell adhesion	0.558814	0.000460411	-0.00601607	-0.0173822	0.221035	0.00033389	0.000257284	-0.0116991	Endothelial - Endothelial	Endothelial - ICAM1 - IL2RG - Endothelial	Endothelial - ICAM1	IL2RG - Endothelial	human
Endothelial	Endothelial	ICAM1	ITGAL	ICAM1 - ITGAL	Cell-cell adhesion	0.558814	0	-0.00601607	-0.0123729	0.221035	0	0	-0.00919447	Endothelial - Endothelial	Endothelial - ICAM1 - ITGAL - Endothelial	Endothelial - ICAM1	ITGAL - Endothelial	human
Endothelial	Endothelial	ICAM1	ITGAM	ICAM1 - ITGAM	Cell-cell adhesion	0.558814	0.000220423	-0.00601607	-0.0131065	0.221035	0.000166945	0.000123176	-0.00956129	Endothelial - Endothelial	Endothelial - ICAM1 - ITGAM - Endothelial	Endothelial - ICAM1	ITGAM - Endothelial	human
Endothelial	Endothelial	ICAM1	ITGAX	ICAM1 - ITGAX	Cell-cell adhesion	0.558814	0.000644465	-0.00601607	-0.0102294	0.221035	0.00033389	0.000360136	-0.00812273	Endothelial - Endothelial	Endothelial - ICAM1 - ITGAX - Endothelial	Endothelial - ICAM1	ITGAX - Endothelial	human
Endothelial	Endothelial	ICAM1	ITGB2	ICAM1 - ITGB2	Cell-cell adhesion	0.558814	0.0111766	-0.00601607	-0.176937	0.221035	0.00417362	0.00624561	-0.0914763	Endothelial - Endothelial	Endothelial - ICAM1 - ITGB2 - Endothelial	Endothelial - ICAM1	ITGB2 - Endothelial	human
Endothelial	Endothelial	ICAM2	ITGAL	ICAM2 - ITGAL	Cell-cell adhesion	1.4103	0	0.575919	-0.0123729	0.662104	0	0	0.281773	Endothelial - Endothelial	Endothelial - ICAM2 - ITGAL - Endothelial	Endothelial - ICAM2	ITGAL - Endothelial	human
Endothelial	Endothelial	ICAM2	ITGAM	ICAM2 - ITGAM	Cell-cell adhesion	1.4103	0.000220423	0.575919	-0.0131065	0.662104	0.000166945	0.000310864	0.281406	Endothelial - Endothelial	Endothelial - ICAM2 - ITGAM - Endothelial	Endothelial - ICAM2	ITGAM - Endothelial	human
Endothelial	Endothelial	ICAM2	ITGB2	ICAM2 - ITGB2	Cell-cell adhesion	1.4103	0.0111766	0.575919	-0.176937	0.662104	0.00417362	0.0157624	0.199491	Endothelial - Endothelial	Endothelial - ICAM2 - ITGB2 - Endothelial	Endothelial - ICAM2	ITGB2 - Endothelial	human
Endothelial	Endothelial	ICAM3	CLEC4M	ICAM3 - CLEC4M	Cell-cell adhesion	0.156865	0.00130907	-0.0268342	-0.0172439	0.0833055	0.00100167	0.000205347	-0.0220391	Endothelial - Endothelial	Endothelial - ICAM3 - CLEC4M - Endothelial	Endothelial - ICAM3	CLEC4M - Endothelial	human
Endothelial	Endothelial	ICAM3	ITGAD	ICAM3 - ITGAD	Cell-cell adhesion	0.156865	NA	-0.0268342	NA	0.0833055	NA	NA	NA	Endothelial - Endothelial	Endothelial - ICAM3 - ITGAD - Endothelial	Endothelial - ICAM3	ITGAD - Endothelial	human
Endothelial	Endothelial	ICAM3	ITGAL	ICAM3 - ITGAL	Cell-cell adhesion	0.156865	0	-0.0268342	-0.0123729	0.0833055	0	0	-0.0196035	Endothelial - Endothelial	Endothelial - ICAM3 - ITGAL - Endothelial	Endothelial - ICAM3	ITGAL - Endothelial	human
Endothelial	Endothelial	ICAM3	ITGB2	ICAM3 - ITGB2	Cell-cell adhesion	0.156865	0.0111766	-0.0268342	-0.176937	0.0833055	0.00417362	0.00175321	-0.101885	Endothelial - Endothelial	Endothelial - ICAM3 - ITGB2 - Endothelial	Endothelial - ICAM3	ITGB2 - Endothelial	human
Endothelial	Endothelial	ICAM4	ITGA2B	ICAM4 - ITGA2B	Cell-cell adhesion	0.00247239	0.00360779	-0.068906	-0.0143037	0.00166945	0.00133556	8.91986e-06	-0.0416048	Endothelial - Endothelial	Endothelial - ICAM4 - ITGA2B - Endothelial	Endothelial - ICAM4	ITGA2B - Endothelial	human
Endothelial	Endothelial	ICAM4	ITGA4	ICAM4 - ITGA4	Cell-cell adhesion	0.00247239	0.0256639	-0.068906	-0.205822	0.00166945	0.00784641	6.34512e-05	-0.137364	Endothelial - Endothelial	Endothelial - ICAM4 - ITGA4 - Endothelial	Endothelial - ICAM4	ITGA4 - Endothelial	human
Endothelial	Endothelial	ICAM4	ITGAL	ICAM4 - ITGAL	Cell-cell adhesion	0.00247239	0	-0.068906	-0.0123729	0.00166945	0	0	-0.0406394	Endothelial - Endothelial	Endothelial - ICAM4 - ITGAL - Endothelial	Endothelial - ICAM4	ITGAL - Endothelial	human
Endothelial	Endothelial	ICAM4	ITGAM	ICAM4 - ITGAM	Cell-cell adhesion	0.00247239	0.000220423	-0.068906	-0.0131065	0.00166945	0.000166945	5.44972e-07	-0.0410062	Endothelial - Endothelial	Endothelial - ICAM4 - ITGAM - Endothelial	Endothelial - ICAM4	ITGAM - Endothelial	human
Endothelial	Endothelial	ICAM4	ITGAV	ICAM4 - ITGAV	Cell-cell adhesion	0.00247239	0.857661	-0.068906	0.117173	0.00166945	0.425543	0.00212047	0.0241333	Endothelial - Endothelial	Endothelial - ICAM4 - ITGAV - Endothelial	Endothelial - ICAM4	ITGAV - Endothelial	human
Endothelial	Endothelial	ICAM4	ITGB1	ICAM4 - ITGB1	Cell-cell adhesion	0.00247239	2.24898	-0.068906	0.131115	0.00166945	0.894825	0.00556036	0.0311044	Endothelial - Endothelial	Endothelial - ICAM4 - ITGB1 - Endothelial	Endothelial - ICAM4	ITGB1 - Endothelial	human
Endothelial	Endothelial	ICAM4	ITGB2	ICAM4 - ITGB2	Cell-cell adhesion	0.00247239	0.0111766	-0.068906	-0.176937	0.00166945	0.00417362	2.76328e-05	-0.122921	Endothelial - Endothelial	Endothelial - ICAM4 - ITGB2 - Endothelial	Endothelial - ICAM4	ITGB2 - Endothelial	human
Endothelial	Endothelial	ICAM4	ITGB3	ICAM4 - ITGB3	Cell-cell adhesion	0.00247239	0.0218954	-0.068906	-0.0518058	0.00166945	0.0135225	5.41338e-05	-0.0603559	Endothelial - Endothelial	Endothelial - ICAM4 - ITGB3 - Endothelial	Endothelial - ICAM4	ITGB3 - Endothelial	human
Endothelial	Endothelial	ICAM4	RHAG	ICAM4 - RHAG	Cell-cell adhesion	0.00247239	0	-0.068906	0	0.00166945	0	0	-0.034453	Endothelial - Endothelial	Endothelial - ICAM4 - RHAG - Endothelial	Endothelial - ICAM4	RHAG - Endothelial	human
Endothelial	Endothelial	ICAM5	ITGAL	ICAM5 - ITGAL	Cell-cell adhesion	0.00282756	0	-0.046654	-0.0123729	0.000500835	0	0	-0.0295134	Endothelial - Endothelial	Endothelial - ICAM5 - ITGAL - Endothelial	Endothelial - ICAM5	ITGAL - Endothelial	human
Endothelial	Endothelial	ICAM5	ITGB2	ICAM5 - ITGB2	Cell-cell adhesion	0.00282756	0.0111766	-0.046654	-0.176937	0.000500835	0.00417362	3.16023e-05	-0.111795	Endothelial - Endothelial	Endothelial - ICAM5 - ITGB2 - Endothelial	Endothelial - ICAM5	ITGB2 - Endothelial	human
Endothelial	Endothelial	IFNA10	IFNAR1	IFNA10 - IFNAR1	UNCAT	NA	0.571605	NA	0.119946	NA	0.296661	NA	NA	Endothelial - Endothelial	Endothelial - IFNA10 - IFNAR1 - Endothelial	Endothelial - IFNA10	IFNAR1 - Endothelial	human
Endothelial	Endothelial	IFNA10	IFNAR2	IFNA10 - IFNAR2	UNCAT	NA	0.374134	NA	0.161366	NA	0.189649	NA	NA	Endothelial - Endothelial	Endothelial - IFNA10 - IFNAR2 - Endothelial	Endothelial - IFNA10	IFNAR2 - Endothelial	human
Endothelial	Endothelial	IFNA13	IFNAR1	IFNA13 - IFNAR1	UNCAT	NA	0.571605	NA	0.119946	NA	0.296661	NA	NA	Endothelial - Endothelial	Endothelial - IFNA13 - IFNAR1 - Endothelial	Endothelial - IFNA13	IFNAR1 - Endothelial	human
Endothelial	Endothelial	IFNA13	IFNAR2	IFNA13 - IFNAR2	UNCAT	NA	0.374134	NA	0.161366	NA	0.189649	NA	NA	Endothelial - Endothelial	Endothelial - IFNA13 - IFNAR2 - Endothelial	Endothelial - IFNA13	IFNAR2 - Endothelial	human
Endothelial	Endothelial	IFNA14	IFNAR1	IFNA14 - IFNAR1	UNCAT	NA	0.571605	NA	0.119946	NA	0.296661	NA	NA	Endothelial - Endothelial	Endothelial - IFNA14 - IFNAR1 - Endothelial	Endothelial - IFNA14	IFNAR1 - Endothelial	human
Endothelial	Endothelial	IFNA14	IFNAR2	IFNA14 - IFNAR2	UNCAT	NA	0.374134	NA	0.161366	NA	0.189649	NA	NA	Endothelial - Endothelial	Endothelial - IFNA14 - IFNAR2 - Endothelial	Endothelial - IFNA14	IFNAR2 - Endothelial	human
Endothelial	Endothelial	IFNA16	IFNAR1	IFNA16 - IFNAR1	UNCAT	NA	0.571605	NA	0.119946	NA	0.296661	NA	NA	Endothelial - Endothelial	Endothelial - IFNA16 - IFNAR1 - Endothelial	Endothelial - IFNA16	IFNAR1 - Endothelial	human
Endothelial	Endothelial	IFNA16	IFNAR2	IFNA16 - IFNAR2	UNCAT	NA	0.374134	NA	0.161366	NA	0.189649	NA	NA	Endothelial - Endothelial	Endothelial - IFNA16 - IFNAR2 - Endothelial	Endothelial - IFNA16	IFNAR2 - Endothelial	human
Endothelial	Endothelial	IFNA17	IFNAR1	IFNA17 - IFNAR1	UNCAT	NA	0.571605	NA	0.119946	NA	0.296661	NA	NA	Endothelial - Endothelial	Endothelial - IFNA17 - IFNAR1 - Endothelial	Endothelial - IFNA17	IFNAR1 - Endothelial	human
Endothelial	Endothelial	IFNA17	IFNAR2	IFNA17 - IFNAR2	UNCAT	NA	0.374134	NA	0.161366	NA	0.189649	NA	NA	Endothelial - Endothelial	Endothelial - IFNA17 - IFNAR2 - Endothelial	Endothelial - IFNA17	IFNAR2 - Endothelial	human
Endothelial	Endothelial	IFNA1	IFNAR1	IFNA1 - IFNAR1	UNCAT	NA	0.571605	NA	0.119946	NA	0.296661	NA	NA	Endothelial - Endothelial	Endothelial - IFNA1 - IFNAR1 - Endothelial	Endothelial - IFNA1	IFNAR1 - Endothelial	human
Endothelial	Endothelial	IFNA1	IFNAR2	IFNA1 - IFNAR2	UNCAT	NA	0.374134	NA	0.161366	NA	0.189649	NA	NA	Endothelial - Endothelial	Endothelial - IFNA1 - IFNAR2 - Endothelial	Endothelial - IFNA1	IFNAR2 - Endothelial	human
Endothelial	Endothelial	IFNA21	IFNAR1	IFNA21 - IFNAR1	UNCAT	NA	0.571605	NA	0.119946	NA	0.296661	NA	NA	Endothelial - Endothelial	Endothelial - IFNA21 - IFNAR1 - Endothelial	Endothelial - IFNA21	IFNAR1 - Endothelial	human
Endothelial	Endothelial	IFNA21	IFNAR2	IFNA21 - IFNAR2	UNCAT	NA	0.374134	NA	0.161366	NA	0.189649	NA	NA	Endothelial - Endothelial	Endothelial - IFNA21 - IFNAR2 - Endothelial	Endothelial - IFNA21	IFNAR2 - Endothelial	human
Endothelial	Endothelial	IFNA2	IFNAR1	IFNA2 - IFNAR1	UNCAT	NA	0.571605	NA	0.119946	NA	0.296661	NA	NA	Endothelial - Endothelial	Endothelial - IFNA2 - IFNAR1 - Endothelial	Endothelial - IFNA2	IFNAR1 - Endothelial	human
Endothelial	Endothelial	IFNA2	IFNAR2	IFNA2 - IFNAR2	UNCAT	NA	0.374134	NA	0.161366	NA	0.189649	NA	NA	Endothelial - Endothelial	Endothelial - IFNA2 - IFNAR2 - Endothelial	Endothelial - IFNA2	IFNAR2 - Endothelial	human
Endothelial	Endothelial	IFNA4	IFNAR1	IFNA4 - IFNAR1	UNCAT	NA	0.571605	NA	0.119946	NA	0.296661	NA	NA	Endothelial - Endothelial	Endothelial - IFNA4 - IFNAR1 - Endothelial	Endothelial - IFNA4	IFNAR1 - Endothelial	human
Endothelial	Endothelial	IFNA4	IFNAR2	IFNA4 - IFNAR2	UNCAT	NA	0.374134	NA	0.161366	NA	0.189649	NA	NA	Endothelial - Endothelial	Endothelial - IFNA4 - IFNAR2 - Endothelial	Endothelial - IFNA4	IFNAR2 - Endothelial	human
Endothelial	Endothelial	IFNA5	IFNAR1	IFNA5 - IFNAR1	UNCAT	NA	0.571605	NA	0.119946	NA	0.296661	NA	NA	Endothelial - Endothelial	Endothelial - IFNA5 - IFNAR1 - Endothelial	Endothelial - IFNA5	IFNAR1 - Endothelial	human
Endothelial	Endothelial	IFNA5	IFNAR2	IFNA5 - IFNAR2	UNCAT	NA	0.374134	NA	0.161366	NA	0.189649	NA	NA	Endothelial - Endothelial	Endothelial - IFNA5 - IFNAR2 - Endothelial	Endothelial - IFNA5	IFNAR2 - Endothelial	human
Endothelial	Endothelial	IFNA6	IFNAR1	IFNA6 - IFNAR1	UNCAT	NA	0.571605	NA	0.119946	NA	0.296661	NA	NA	Endothelial - Endothelial	Endothelial - IFNA6 - IFNAR1 - Endothelial	Endothelial - IFNA6	IFNAR1 - Endothelial	human
Endothelial	Endothelial	IFNA6	IFNAR2	IFNA6 - IFNAR2	UNCAT	NA	0.374134	NA	0.161366	NA	0.189649	NA	NA	Endothelial - Endothelial	Endothelial - IFNA6 - IFNAR2 - Endothelial	Endothelial - IFNA6	IFNAR2 - Endothelial	human
Endothelial	Endothelial	IFNA7	IFNAR1	IFNA7 - IFNAR1	UNCAT	NA	0.571605	NA	0.119946	NA	0.296661	NA	NA	Endothelial - Endothelial	Endothelial - IFNA7 - IFNAR1 - Endothelial	Endothelial - IFNA7	IFNAR1 - Endothelial	human
Endothelial	Endothelial	IFNA7	IFNAR2	IFNA7 - IFNAR2	UNCAT	NA	0.374134	NA	0.161366	NA	0.189649	NA	NA	Endothelial - Endothelial	Endothelial - IFNA7 - IFNAR2 - Endothelial	Endothelial - IFNA7	IFNAR2 - Endothelial	human
Endothelial	Endothelial	IFNA8	IFNAR1	IFNA8 - IFNAR1	UNCAT	NA	0.571605	NA	0.119946	NA	0.296661	NA	NA	Endothelial - Endothelial	Endothelial - IFNA8 - IFNAR1 - Endothelial	Endothelial - IFNA8	IFNAR1 - Endothelial	human
Endothelial	Endothelial	IFNA8	IFNAR2	IFNA8 - IFNAR2	UNCAT	NA	0.374134	NA	0.161366	NA	0.189649	NA	NA	Endothelial - Endothelial	Endothelial - IFNA8 - IFNAR2 - Endothelial	Endothelial - IFNA8	IFNAR2 - Endothelial	human
Endothelial	Endothelial	IFNB1	IFNAR1	IFNB1 - IFNAR1	UNCAT	NA	0.571605	NA	0.119946	NA	0.296661	NA	NA	Endothelial - Endothelial	Endothelial - IFNB1 - IFNAR1 - Endothelial	Endothelial - IFNB1	IFNAR1 - Endothelial	human
Endothelial	Endothelial	IFNB1	IFNAR2	IFNB1 - IFNAR2	UNCAT	NA	0.374134	NA	0.161366	NA	0.189649	NA	NA	Endothelial - Endothelial	Endothelial - IFNB1 - IFNAR2 - Endothelial	Endothelial - IFNB1	IFNAR2 - Endothelial	human
Endothelial	Endothelial	IFNG	IFNGR1	IFNG - IFNGR1	UNCAT	NA	0.504636	NA	0.172799	NA	0.248915	NA	NA	Endothelial - Endothelial	Endothelial - IFNG - IFNGR1 - Endothelial	Endothelial - IFNG	IFNGR1 - Endothelial	human
Endothelial	Endothelial	IFNG	IFNGR2	IFNG - IFNGR2	UNCAT	NA	0.403716	NA	0.0964425	NA	0.220033	NA	NA	Endothelial - Endothelial	Endothelial - IFNG - IFNGR2 - Endothelial	Endothelial - IFNG	IFNGR2 - Endothelial	human
Endothelial	Endothelial	IFNL1	IFNLR1	IFNL1 - IFNLR1	UNCAT	NA	0.00145274	NA	-0.0414826	NA	0.000500835	NA	NA	Endothelial - Endothelial	Endothelial - IFNL1 - IFNLR1 - Endothelial	Endothelial - IFNL1	IFNLR1 - Endothelial	human
Endothelial	Endothelial	IFNL1	IL10RB	IFNL1 - IL10RB	UNCAT	NA	0.160042	NA	-0.0199275	NA	0.087813	NA	NA	Endothelial - Endothelial	Endothelial - IFNL1 - IL10RB - Endothelial	Endothelial - IFNL1	IL10RB - Endothelial	human
Endothelial	Endothelial	IFNL2	IFNLR1	IFNL2 - IFNLR1	UNCAT	NA	0.00145274	NA	-0.0414826	NA	0.000500835	NA	NA	Endothelial - Endothelial	Endothelial - IFNL2 - IFNLR1 - Endothelial	Endothelial - IFNL2	IFNLR1 - Endothelial	human
Endothelial	Endothelial	IFNL2	IL10RB	IFNL2 - IL10RB	UNCAT	NA	0.160042	NA	-0.0199275	NA	0.087813	NA	NA	Endothelial - Endothelial	Endothelial - IFNL2 - IL10RB - Endothelial	Endothelial - IFNL2	IL10RB - Endothelial	human
Endothelial	Endothelial	IFNL3	IFNLR1	IFNL3 - IFNLR1	UNCAT	NA	0.00145274	NA	-0.0414826	NA	0.000500835	NA	NA	Endothelial - Endothelial	Endothelial - IFNL3 - IFNLR1 - Endothelial	Endothelial - IFNL3	IFNLR1 - Endothelial	human
Endothelial	Endothelial	IFNL3	IL10RB	IFNL3 - IL10RB	UNCAT	NA	0.160042	NA	-0.0199275	NA	0.087813	NA	NA	Endothelial - Endothelial	Endothelial - IFNL3 - IL10RB - Endothelial	Endothelial - IFNL3	IL10RB - Endothelial	human
Endothelial	Endothelial	IFNW1	IFNAR1	IFNW1 - IFNAR1	UNCAT	NA	0.571605	NA	0.119946	NA	0.296661	NA	NA	Endothelial - Endothelial	Endothelial - IFNW1 - IFNAR1 - Endothelial	Endothelial - IFNW1	IFNAR1 - Endothelial	human
Endothelial	Endothelial	IFNW1	IFNAR2	IFNW1 - IFNAR2	UNCAT	NA	0.374134	NA	0.161366	NA	0.189649	NA	NA	Endothelial - Endothelial	Endothelial - IFNW1 - IFNAR2 - Endothelial	Endothelial - IFNW1	IFNAR2 - Endothelial	human
Endothelial	Endothelial	IGF1	IGF1R	IGF1 - IGF1R	IGF	0.0021242	0.288791	-0.02261	0.105434	0.00100167	0.15192	0.00061345	0.0414119	Endothelial - Endothelial	Endothelial - IGF1 - IGF1R - Endothelial	Endothelial - IGF1	IGF1R - Endothelial	human
Endothelial	Endothelial	IGF1	INSR	IGF1 - INSR	IGF	0.0021242	0.753284	-0.02261	0.254728	0.00100167	0.275626	0.00160013	0.116059	Endothelial - Endothelial	Endothelial - IGF1 - INSR - Endothelial	Endothelial - IGF1	INSR - Endothelial	human
Endothelial	Endothelial	IGF2	IGF1R	IGF2 - IGF1R	IGF	0.0371721	0.288791	0.0061076	0.105434	0.0141903	0.15192	0.010735	0.0557707	Endothelial - Endothelial	Endothelial - IGF2 - IGF1R - Endothelial	Endothelial - IGF2	IGF1R - Endothelial	human
Endothelial	Endothelial	IGF2	IGF2R	IGF2 - IGF2R	IGF	0.0371721	0.402217	0.0061076	-0.0097744	0.0141903	0.192654	0.0149513	-0.0018334	Endothelial - Endothelial	Endothelial - IGF2 - IGF2R - Endothelial	Endothelial - IGF2	IGF2R - Endothelial	human
Endothelial	Endothelial	IGF2	INSR	IGF2 - INSR	IGF	0.0371721	0.753284	0.0061076	0.254728	0.0141903	0.275626	0.0280012	0.130418	Endothelial - Endothelial	Endothelial - IGF2 - INSR - Endothelial	Endothelial - IGF2	INSR - Endothelial	human
Endothelial	Endothelial	IGFBP4	FZD8	IGFBP4 - FZD8	IGF	1.90726	0.0592639	0.280678	0.05034	0.817195	0.0320534	0.113032	0.165509	Endothelial - Endothelial	Endothelial - IGFBP4 - FZD8 - Endothelial	Endothelial - IGFBP4	FZD8 - Endothelial	human
Endothelial	Endothelial	IGFBP4	LRP6	IGFBP4 - LRP6	IGF	1.90726	0.318607	0.280678	0.0532664	0.817195	0.162437	0.607667	0.166972	Endothelial - Endothelial	Endothelial - IGFBP4 - LRP6 - Endothelial	Endothelial - IGFBP4	LRP6 - Endothelial	human
Endothelial	Endothelial	IGFL1	IGFLR1	IGFL1 - IGFLR1	IGF	0.00397302	0.0115306	-0.0493041	-0.140991	0.00133556	0.00684474	4.58112e-05	-0.0951477	Endothelial - Endothelial	Endothelial - IGFL1 - IGFLR1 - Endothelial	Endothelial - IGFL1	IGFLR1 - Endothelial	human
Endothelial	Endothelial	IGFL2	IGFLR1	IGFL2 - IGFLR1	IGF	0.000112324	0.0115306	-0.0195662	-0.140991	0.000166945	0.00684474	1.29516e-06	-0.0802787	Endothelial - Endothelial	Endothelial - IGFL2 - IGFLR1 - Endothelial	Endothelial - IGFL2	IGFLR1 - Endothelial	human
Endothelial	Endothelial	IGFL3	IGFLR1	IGFL3 - IGFLR1	IGF	0.000113376	0.0115306	-0.0139956	-0.140991	0.000166945	0.00684474	1.30729e-06	-0.0774934	Endothelial - Endothelial	Endothelial - IGFL3 - IGFLR1 - Endothelial	Endothelial - IGFL3	IGFLR1 - Endothelial	human
Endothelial	Endothelial	IHH	BOC	IHH - BOC	UNCAT	0.000231359	0.000391262	-0.00740047	-0.0243957	0.000166945	0.000166945	9.0522e-08	-0.0158981	Endothelial - Endothelial	Endothelial - IHH - BOC - Endothelial	Endothelial - IHH	BOC - Endothelial	human
Endothelial	Endothelial	IHH	CDON	IHH - CDON	UNCAT	0.000231359	0.00509079	-0.00740047	-0.0328425	0.000166945	0.00300501	1.1778e-06	-0.0201215	Endothelial - Endothelial	Endothelial - IHH - CDON - Endothelial	Endothelial - IHH	CDON - Endothelial	human
Endothelial	Endothelial	IHH	HHIP	IHH - HHIP	UNCAT	0.000231359	0.923023	-0.00740047	0.29231	0.000166945	0.379967	0.00021355	0.142455	Endothelial - Endothelial	Endothelial - IHH - HHIP - Endothelial	Endothelial - IHH	HHIP - Endothelial	human
Endothelial	Endothelial	IHH	PTCH1	IHH - PTCH1	UNCAT	0.000231359	0.0632649	-0.00740047	0.0590316	0.000166945	0.0330551	1.46369e-05	0.0258155	Endothelial - Endothelial	Endothelial - IHH - PTCH1 - Endothelial	Endothelial - IHH	PTCH1 - Endothelial	human
Endothelial	Endothelial	IHH	PTCH2	IHH - PTCH2	UNCAT	0.000231359	0.000373594	-0.00740047	-0.029241	0.000166945	0.00033389	8.64344e-08	-0.0183207	Endothelial - Endothelial	Endothelial - IHH - PTCH2 - Endothelial	Endothelial - IHH	PTCH2 - Endothelial	human
Endothelial	Endothelial	IL10	IL10RA	IL10 - IL10RA	Interleukins	0.000365559	0	-0.0104134	-0.0154242	0.000166945	0	0	-0.0129188	Endothelial - Endothelial	Endothelial - IL10 - IL10RA - Endothelial	Endothelial - IL10	IL10RA - Endothelial	human
Endothelial	Endothelial	IL10	IL10RB	IL10 - IL10RB	Interleukins	0.000365559	0.160042	-0.0104134	-0.0199275	0.000166945	0.087813	5.85048e-05	-0.0151705	Endothelial - Endothelial	Endothelial - IL10 - IL10RB - Endothelial	Endothelial - IL10	IL10RB - Endothelial	human
Endothelial	Endothelial	IL10	SIRPG	IL10 - SIRPG	Interleukins	0.000365559	NA	-0.0104134	NA	0.000166945	NA	NA	NA	Endothelial - Endothelial	Endothelial - IL10 - SIRPG - Endothelial	Endothelial - IL10	SIRPG - Endothelial	human
Endothelial	Endothelial	IL11	IL11RA	IL11 - IL11RA	Interleukins	0.0407625	0.04028	-0.209395	-0.0122359	0.0106845	0.0191987	0.00164191	-0.110816	Endothelial - Endothelial	Endothelial - IL11 - IL11RA - Endothelial	Endothelial - IL11	IL11RA - Endothelial	human
Endothelial	Endothelial	IL11	IL6ST	IL11 - IL6ST	Interleukins	0.0407625	1.54667	-0.209395	0.418353	0.0106845	0.701169	0.0630462	0.104479	Endothelial - Endothelial	Endothelial - IL11 - IL6ST - Endothelial	Endothelial - IL11	IL6ST - Endothelial	human
Endothelial	Endothelial	IL12A	CD28	IL12A - CD28	Interleukins	0.0102219	0.000568061	-0.01054	-0.0093637	0.00500835	0.00033389	5.80667e-06	-0.00995185	Endothelial - Endothelial	Endothelial - IL12A - CD28 - Endothelial	Endothelial - IL12A	CD28 - Endothelial	human
Endothelial	Endothelial	IL12A	IL12RB1	IL12A - IL12RB1	Interleukins	0.0102219	0	-0.01054	-0.0154335	0.00500835	0	0	-0.0129868	Endothelial - Endothelial	Endothelial - IL12A - IL12RB1 - Endothelial	Endothelial - IL12A	IL12RB1 - Endothelial	human
Endothelial	Endothelial	IL12A	IL12RB2	IL12A - IL12RB2	Interleukins	0.0102219	0.00127692	-0.01054	-0.0190934	0.00500835	0.00033389	1.30525e-05	-0.0148167	Endothelial - Endothelial	Endothelial - IL12A - IL12RB2 - Endothelial	Endothelial - IL12A	IL12RB2 - Endothelial	human
Endothelial	Endothelial	IL12B	IL12RB1	IL12B - IL12RB1	Interleukins	NA	0	NA	-0.0154335	NA	0	NA	NA	Endothelial - Endothelial	Endothelial - IL12B - IL12RB1 - Endothelial	Endothelial - IL12B	IL12RB1 - Endothelial	human
Endothelial	Endothelial	IL12B	IL12RB2	IL12B - IL12RB2	Interleukins	NA	0.00127692	NA	-0.0190934	NA	0.00033389	NA	NA	Endothelial - Endothelial	Endothelial - IL12B - IL12RB2 - Endothelial	Endothelial - IL12B	IL12RB2 - Endothelial	human
Endothelial	Endothelial	IL12B	IL23R	IL12B - IL23R	Interleukins	NA	NA	NA	NA	NA	NA	NA	NA	Endothelial - Endothelial	Endothelial - IL12B - IL23R - Endothelial	Endothelial - IL12B	IL23R - Endothelial	human
Endothelial	Endothelial	IL13	IL13RA1	IL13 - IL13RA1	Interleukins	NA	0.417564	NA	0.0197254	NA	0.211686	NA	NA	Endothelial - Endothelial	Endothelial - IL13 - IL13RA1 - Endothelial	Endothelial - IL13	IL13RA1 - Endothelial	human
Endothelial	Endothelial	IL13	IL13RA2	IL13 - IL13RA2	Interleukins	NA	0.00484585	NA	-0.0820934	NA	0.00250417	NA	NA	Endothelial - Endothelial	Endothelial - IL13 - IL13RA2 - Endothelial	Endothelial - IL13	IL13RA2 - Endothelial	human
Endothelial	Endothelial	IL13	IL2RG	IL13 - IL2RG	Interleukins	NA	0.000460411	NA	-0.0173822	NA	0.00033389	NA	NA	Endothelial - Endothelial	Endothelial - IL13 - IL2RG - Endothelial	Endothelial - IL13	IL2RG - Endothelial	human
Endothelial	Endothelial	IL13	IL4R	IL13 - IL4R	Interleukins	NA	0.226662	NA	0.0127757	NA	0.112354	NA	NA	Endothelial - Endothelial	Endothelial - IL13 - IL4R - Endothelial	Endothelial - IL13	IL4R - Endothelial	human
Endothelial	Endothelial	IL15	IL15RA	IL15 - IL15RA	Interleukins	0.0782967	0.0754543	-0.00902662	0.0624527	0.0412354	0.0409015	0.00590782	0.026713	Endothelial - Endothelial	Endothelial - IL15 - IL15RA - Endothelial	Endothelial - IL15	IL15RA - Endothelial	human
Endothelial	Endothelial	IL15	IL2RA	IL15 - IL2RA	Interleukins	0.0782967	NA	-0.00902662	NA	0.0412354	NA	NA	NA	Endothelial - Endothelial	Endothelial - IL15 - IL2RA - Endothelial	Endothelial - IL15	IL2RA - Endothelial	human
Endothelial	Endothelial	IL15	IL2RB	IL15 - IL2RB	Interleukins	0.0782967	0	-0.00902662	-0.0114406	0.0412354	0	0	-0.0102336	Endothelial - Endothelial	Endothelial - IL15 - IL2RB - Endothelial	Endothelial - IL15	IL2RB - Endothelial	human
Endothelial	Endothelial	IL15	IL2RG	IL15 - IL2RG	Interleukins	0.0782967	0.000460411	-0.00902662	-0.0173822	0.0412354	0.00033389	3.60486e-05	-0.0132044	Endothelial - Endothelial	Endothelial - IL15 - IL2RG - Endothelial	Endothelial - IL15	IL2RG - Endothelial	human
Endothelial	Endothelial	IL16	CCR5	IL16 - CCR5	CC	0.0096086	NA	-0.0137109	NA	0.00383973	NA	NA	NA	Endothelial - Endothelial	Endothelial - IL16 - CCR5 - Endothelial	Endothelial - IL16	CCR5 - Endothelial	human
Endothelial	Endothelial	IL16	CD4	IL16 - CD4	Interleukins	0.0096086	0.00994187	-0.0137109	-0.158794	0.00383973	0.00300501	9.55274e-05	-0.0862525	Endothelial - Endothelial	Endothelial - IL16 - CD4 - Endothelial	Endothelial - IL16	CD4 - Endothelial	human
Endothelial	Endothelial	IL16	GRIN2C	IL16 - GRIN2C	Interleukins	0.0096086	0.000918144	-0.0137109	-0.0230896	0.00383973	0.00033389	8.82208e-06	-0.0184003	Endothelial - Endothelial	Endothelial - IL16 - GRIN2C - Endothelial	Endothelial - IL16	GRIN2C - Endothelial	human
Endothelial	Endothelial	IL16	GRIN2D	IL16 - GRIN2D	Interleukins	0.0096086	0.00903473	-0.0137109	-0.0318444	0.00383973	0.00467446	8.68111e-05	-0.0227777	Endothelial - Endothelial	Endothelial - IL16 - GRIN2D - Endothelial	Endothelial - IL16	GRIN2D - Endothelial	human
Endothelial	Endothelial	IL16	KCNA3	IL16 - KCNA3	Interleukins	0.0096086	0	-0.0137109	-0.0174889	0.00383973	0	0	-0.0155999	Endothelial - Endothelial	Endothelial - IL16 - KCNA3 - Endothelial	Endothelial - IL16	KCNA3 - Endothelial	human
Endothelial	Endothelial	IL16	KCND1	IL16 - KCND1	Interleukins	0.0096086	0.00621538	-0.0137109	-0.0173907	0.00383973	0.00250417	5.97211e-05	-0.0155508	Endothelial - Endothelial	Endothelial - IL16 - KCND1 - Endothelial	Endothelial - IL16	KCND1 - Endothelial	human
Endothelial	Endothelial	IL16	KCND2	IL16 - KCND2	Interleukins	0.0096086	0.00206686	-0.0137109	-0.0521502	0.00383973	0.000834725	1.98596e-05	-0.0329306	Endothelial - Endothelial	Endothelial - IL16 - KCND2 - Endothelial	Endothelial - IL16	KCND2 - Endothelial	human
Endothelial	Endothelial	IL16	KCNJ10	IL16 - KCNJ10	Interleukins	0.0096086	0	-0.0137109	0	0.00383973	0	0	-0.00685547	Endothelial - Endothelial	Endothelial - IL16 - KCNJ10 - Endothelial	Endothelial - IL16	KCNJ10 - Endothelial	human
Endothelial	Endothelial	IL16	KCNJ15	IL16 - KCNJ15	Interleukins	0.0096086	0.0201179	-0.0137109	-0.0109721	0.00383973	0.0096828	0.000193304	-0.0123415	Endothelial - Endothelial	Endothelial - IL16 - KCNJ15 - Endothelial	Endothelial - IL16	KCNJ15 - Endothelial	human
Endothelial	Endothelial	IL16	KCNJ4	IL16 - KCNJ4	Interleukins	0.0096086	NA	-0.0137109	NA	0.00383973	NA	NA	NA	Endothelial - Endothelial	Endothelial - IL16 - KCNJ4 - Endothelial	Endothelial - IL16	KCNJ4 - Endothelial	human
Endothelial	Endothelial	IL17A	IL17RA	IL17A - IL17RA	Interleukins	NA	0.138765	NA	0.0548449	NA	0.0749583	NA	NA	Endothelial - Endothelial	Endothelial - IL17A - IL17RA - Endothelial	Endothelial - IL17A	IL17RA - Endothelial	human
Endothelial	Endothelial	IL17A	IL17RC	IL17A - IL17RC	Interleukins	NA	0.0517762	NA	-0.0392079	NA	0.027212	NA	NA	Endothelial - Endothelial	Endothelial - IL17A - IL17RC - Endothelial	Endothelial - IL17A	IL17RC - Endothelial	human
Endothelial	Endothelial	IL17B	IL17RB	IL17B - IL17RB	Interleukins	0.00072331	0	-0.0406172	-0.0153351	0.00033389	0	0	-0.0279762	Endothelial - Endothelial	Endothelial - IL17B - IL17RB - Endothelial	Endothelial - IL17B	IL17RB - Endothelial	human
Endothelial	Endothelial	IL17F	IL17RA	IL17F - IL17RA	Interleukins	NA	0.138765	NA	0.0548449	NA	0.0749583	NA	NA	Endothelial - Endothelial	Endothelial - IL17F - IL17RA - Endothelial	Endothelial - IL17F	IL17RA - Endothelial	human
Endothelial	Endothelial	IL18	CD48	IL18 - CD48	Interleukins	0.0236827	NA	-0.145618	NA	0.0101836	NA	NA	NA	Endothelial - Endothelial	Endothelial - IL18 - CD48 - Endothelial	Endothelial - IL18	CD48 - Endothelial	human
Endothelial	Endothelial	IL18	IL18R1	IL18 - IL18R1	Interleukins	0.0236827	0.0972233	-0.145618	0.111484	0.0101836	0.0479132	0.00230251	-0.0170668	Endothelial - Endothelial	Endothelial - IL18 - IL18R1 - Endothelial	Endothelial - IL18	IL18R1 - Endothelial	human
Endothelial	Endothelial	IL18	IL18RAP	IL18 - IL18RAP	Interleukins	0.0236827	0.00169202	-0.145618	-0.0118242	0.0101836	0.00066778	4.00715e-05	-0.078721	Endothelial - Endothelial	Endothelial - IL18 - IL18RAP - Endothelial	Endothelial - IL18	IL18RAP - Endothelial	human
Endothelial	Endothelial	IL18	IL1RAPL1	IL18 - IL1RAPL1	Interleukins	0.0236827	0.00927402	-0.145618	-0.0085949	0.0101836	0.0048414	0.000219634	-0.0771063	Endothelial - Endothelial	Endothelial - IL18 - IL1RAPL1 - Endothelial	Endothelial - IL18	IL1RAPL1 - Endothelial	human
Endothelial	Endothelial	IL18	IL1RL2	IL18 - IL1RL2	Interleukins	0.0236827	0.000689376	-0.145618	-0.0695041	0.0101836	0.000500835	1.63263e-05	-0.107561	Endothelial - Endothelial	Endothelial - IL18 - IL1RL2 - Endothelial	Endothelial - IL18	IL1RL2 - Endothelial	human
Endothelial	Endothelial	IL19	IL20RA	IL19 - IL20RA	Interleukins	0.00149213	0	-0.0218988	-0.0198257	0.000166945	0	0	-0.0208622	Endothelial - Endothelial	Endothelial - IL19 - IL20RA - Endothelial	Endothelial - IL19	IL20RA - Endothelial	human
Endothelial	Endothelial	IL19	IL20RB	IL19 - IL20RB	Interleukins	0.00149213	0.0230467	-0.0218988	-0.180091	0.000166945	0.00751252	3.43887e-05	-0.100995	Endothelial - Endothelial	Endothelial - IL19 - IL20RB - Endothelial	Endothelial - IL19	IL20RB - Endothelial	human
Endothelial	Endothelial	IL1A	IL1R1	IL1A - IL1R1	Interleukins	0.00267254	0.145833	-0.031245	-0.297386	0.00166945	0.0652755	0.000389745	-0.164316	Endothelial - Endothelial	Endothelial - IL1A - IL1R1 - Endothelial	Endothelial - IL1A	IL1R1 - Endothelial	human
Endothelial	Endothelial	IL1A	IL1R2	IL1A - IL1R2	Interleukins	0.00267254	0.00187531	-0.031245	-0.0829208	0.00166945	0.00133556	5.01183e-06	-0.0570829	Endothelial - Endothelial	Endothelial - IL1A - IL1R2 - Endothelial	Endothelial - IL1A	IL1R2 - Endothelial	human
Endothelial	Endothelial	IL1A	IL1RAP	IL1A - IL1RAP	Interleukins	0.00267254	0.0400526	-0.031245	-0.104819	0.00166945	0.021202	0.000107042	-0.0680319	Endothelial - Endothelial	Endothelial - IL1A - IL1RAP - Endothelial	Endothelial - IL1A	IL1RAP - Endothelial	human
Endothelial	Endothelial	IL1B	ADRB2	IL1B - ADRB2	Interleukins	0.0798235	0.00981164	-0.19781	-0.0472657	0.021202	0.00450751	0.000783199	-0.122538	Endothelial - Endothelial	Endothelial - IL1B - ADRB2 - Endothelial	Endothelial - IL1B	ADRB2 - Endothelial	human
Endothelial	Endothelial	IL1B	IL1R1	IL1B - IL1R1	Interleukins	0.0798235	0.145833	-0.19781	-0.297386	0.021202	0.0652755	0.0116409	-0.247598	Endothelial - Endothelial	Endothelial - IL1B - IL1R1 - Endothelial	Endothelial - IL1B	IL1R1 - Endothelial	human
Endothelial	Endothelial	IL1B	IL1R2	IL1B - IL1R2	Interleukins	0.0798235	0.00187531	-0.19781	-0.0829208	0.021202	0.00133556	0.000149693	-0.140365	Endothelial - Endothelial	Endothelial - IL1B - IL1R2 - Endothelial	Endothelial - IL1B	IL1R2 - Endothelial	human
Endothelial	Endothelial	IL1B	IL1RAP	IL1B - IL1RAP	Interleukins	0.0798235	0.0400526	-0.19781	-0.104819	0.021202	0.021202	0.00319713	-0.151314	Endothelial - Endothelial	Endothelial - IL1B - IL1RAP - Endothelial	Endothelial - IL1B	IL1RAP - Endothelial	human
Endothelial	Endothelial	IL1F10	IL1R1	IL1F10 - IL1R1	Interleukins	NA	0.145833	NA	-0.297386	NA	0.0652755	NA	NA	Endothelial - Endothelial	Endothelial - IL1F10 - IL1R1 - Endothelial	Endothelial - IL1F10	IL1R1 - Endothelial	human
Endothelial	Endothelial	IL1RN	IL1R1	IL1RN - IL1R1	Interleukins	0.00437971	0.145833	-0.0490931	-0.297386	0.00066778	0.0652755	0.000638708	-0.17324	Endothelial - Endothelial	Endothelial - IL1RN - IL1R1 - Endothelial	Endothelial - IL1RN	IL1R1 - Endothelial	human
Endothelial	Endothelial	IL1RN	IL1R2	IL1RN - IL1R2	Interleukins	0.00437971	0.00187531	-0.0490931	-0.0829208	0.00066778	0.00133556	8.2133e-06	-0.066007	Endothelial - Endothelial	Endothelial - IL1RN - IL1R2 - Endothelial	Endothelial - IL1RN	IL1R2 - Endothelial	human
Endothelial	Endothelial	IL1RN	IL1RL2	IL1RN - IL1RL2	Interleukins	0.00437971	0.000689376	-0.0490931	-0.0695041	0.00066778	0.000500835	3.01927e-06	-0.0592986	Endothelial - Endothelial	Endothelial - IL1RN - IL1RL2 - Endothelial	Endothelial - IL1RN	IL1RL2 - Endothelial	human
Endothelial	Endothelial	IL20	IL20RA	IL20 - IL20RA	Interleukins	0	0	-0.0156185	-0.0198257	0	0	0	-0.0177221	Endothelial - Endothelial	Endothelial - IL20 - IL20RA - Endothelial	Endothelial - IL20	IL20RA - Endothelial	human
Endothelial	Endothelial	IL20	IL20RB	IL20 - IL20RB	Interleukins	0	0.0230467	-0.0156185	-0.180091	0	0.00751252	0	-0.097855	Endothelial - Endothelial	Endothelial - IL20 - IL20RB - Endothelial	Endothelial - IL20	IL20RB - Endothelial	human
Endothelial	Endothelial	IL20	IL22RA1	IL20 - IL22RA1	Interleukins	0	0.000105582	-0.0156185	-0.0227865	0	0.000166945	0	-0.0192025	Endothelial - Endothelial	Endothelial - IL20 - IL22RA1 - Endothelial	Endothelial - IL20	IL22RA1 - Endothelial	human
Endothelial	Endothelial	IL21	IL21R	IL21 - IL21R	Interleukins	NA	0.000390256	NA	-0.0326613	NA	0.000166945	NA	NA	Endothelial - Endothelial	Endothelial - IL21 - IL21R - Endothelial	Endothelial - IL21	IL21R - Endothelial	human
Endothelial	Endothelial	IL21	IL2RG	IL21 - IL2RG	Interleukins	NA	0.000460411	NA	-0.0173822	NA	0.00033389	NA	NA	Endothelial - Endothelial	Endothelial - IL21 - IL2RG - Endothelial	Endothelial - IL21	IL2RG - Endothelial	human
Endothelial	Endothelial	IL22	IL10RA	IL22 - IL10RA	Interleukins	NA	0	NA	-0.0154242	NA	0	NA	NA	Endothelial - Endothelial	Endothelial - IL22 - IL10RA - Endothelial	Endothelial - IL22	IL10RA - Endothelial	human
Endothelial	Endothelial	IL22	IL10RB	IL22 - IL10RB	Interleukins	NA	0.160042	NA	-0.0199275	NA	0.087813	NA	NA	Endothelial - Endothelial	Endothelial - IL22 - IL10RB - Endothelial	Endothelial - IL22	IL10RB - Endothelial	human
Endothelial	Endothelial	IL22	IL21R	IL22 - IL21R	Interleukins	NA	0.000390256	NA	-0.0326613	NA	0.000166945	NA	NA	Endothelial - Endothelial	Endothelial - IL22 - IL21R - Endothelial	Endothelial - IL22	IL21R - Endothelial	human
Endothelial	Endothelial	IL22	IL22RA1	IL22 - IL22RA1	Interleukins	NA	0.000105582	NA	-0.0227865	NA	0.000166945	NA	NA	Endothelial - Endothelial	Endothelial - IL22 - IL22RA1 - Endothelial	Endothelial - IL22	IL22RA1 - Endothelial	human
Endothelial	Endothelial	IL22	IL22RA2	IL22 - IL22RA2	Interleukins	NA	NA	NA	NA	NA	NA	NA	NA	Endothelial - Endothelial	Endothelial - IL22 - IL22RA2 - Endothelial	Endothelial - IL22	IL22RA2 - Endothelial	human
Endothelial	Endothelial	IL23A	IL12RB1	IL23A - IL12RB1	Interleukins	0.0033619	0	-0.0428417	-0.0154335	0.00183639	0	0	-0.0291376	Endothelial - Endothelial	Endothelial - IL23A - IL12RB1 - Endothelial	Endothelial - IL23A	IL12RB1 - Endothelial	human
Endothelial	Endothelial	IL23A	IL23R	IL23A - IL23R	Interleukins	0.0033619	NA	-0.0428417	NA	0.00183639	NA	NA	NA	Endothelial - Endothelial	Endothelial - IL23A - IL23R - Endothelial	Endothelial - IL23A	IL23R - Endothelial	human
Endothelial	Endothelial	IL24	IL20RA	IL24 - IL20RA	Interleukins	0.00728467	0	-0.0915311	-0.0198257	0.00166945	0	0	-0.0556784	Endothelial - Endothelial	Endothelial - IL24 - IL20RA - Endothelial	Endothelial - IL24	IL20RA - Endothelial	human
Endothelial	Endothelial	IL24	IL20RB	IL24 - IL20RB	Interleukins	0.00728467	0.0230467	-0.0915311	-0.180091	0.00166945	0.00751252	0.000167888	-0.135811	Endothelial - Endothelial	Endothelial - IL24 - IL20RB - Endothelial	Endothelial - IL24	IL20RB - Endothelial	human
Endothelial	Endothelial	IL24	IL22RA1	IL24 - IL22RA1	Interleukins	0.00728467	0.000105582	-0.0915311	-0.0227865	0.00166945	0.000166945	7.69132e-07	-0.0571588	Endothelial - Endothelial	Endothelial - IL24 - IL22RA1 - Endothelial	Endothelial - IL24	IL22RA1 - Endothelial	human
Endothelial	Endothelial	IL25	IL17RB	IL25 - IL17RB	Interleukins	NA	0	NA	-0.0153351	NA	0	NA	NA	Endothelial - Endothelial	Endothelial - IL25 - IL17RB - Endothelial	Endothelial - IL25	IL17RB - Endothelial	human
Endothelial	Endothelial	IL26	IL20RA	IL26 - IL20RA	Interleukins	0.000705947	0	-0.0118791	-0.0198257	0.000166945	0	0	-0.0158524	Endothelial - Endothelial	Endothelial - IL26 - IL20RA - Endothelial	Endothelial - IL26	IL20RA - Endothelial	human
Endothelial	Endothelial	IL27	IL27RA	IL27 - IL27RA	Interleukins	NA	0.0835386	NA	-0.0863737	NA	0.0355593	NA	NA	Endothelial - Endothelial	Endothelial - IL27 - IL27RA - Endothelial	Endothelial - IL27	IL27RA - Endothelial	human
Endothelial	Endothelial	IL2	CD53	IL2 - CD53	Interleukins	NA	0.000176105	NA	-0.0313981	NA	0.000166945	NA	NA	Endothelial - Endothelial	Endothelial - IL2 - CD53 - Endothelial	Endothelial - IL2	CD53 - Endothelial	human
Endothelial	Endothelial	IL2	GYPE	IL2 - GYPE	Interleukins	NA	0.000368708	NA	-0.0272475	NA	0.000166945	NA	NA	Endothelial - Endothelial	Endothelial - IL2 - GYPE - Endothelial	Endothelial - IL2	GYPE - Endothelial	human
Endothelial	Endothelial	IL2	IL2RA	IL2 - IL2RA	Interleukins	NA	NA	NA	NA	NA	NA	NA	NA	Endothelial - Endothelial	Endothelial - IL2 - IL2RA - Endothelial	Endothelial - IL2	IL2RA - Endothelial	human
Endothelial	Endothelial	IL2	IL2RB	IL2 - IL2RB	Interleukins	NA	0	NA	-0.0114406	NA	0	NA	NA	Endothelial - Endothelial	Endothelial - IL2 - IL2RB - Endothelial	Endothelial - IL2	IL2RB - Endothelial	human
Endothelial	Endothelial	IL2	IL2RG	IL2 - IL2RG	Interleukins	NA	0.000460411	NA	-0.0173822	NA	0.00033389	NA	NA	Endothelial - Endothelial	Endothelial - IL2 - IL2RG - Endothelial	Endothelial - IL2	IL2RG - Endothelial	human
Endothelial	Endothelial	IL2	NGFR	IL2 - NGFR	Interleukins	NA	NA	NA	NA	NA	NA	NA	NA	Endothelial - Endothelial	Endothelial - IL2 - NGFR - Endothelial	Endothelial - IL2	NGFR - Endothelial	human
Endothelial	Endothelial	IL31	IL31RA	IL31 - IL31RA	Interleukins	NA	0.0078052	NA	-0.0176007	NA	0.00383973	NA	NA	Endothelial - Endothelial	Endothelial - IL31 - IL31RA - Endothelial	Endothelial - IL31	IL31RA - Endothelial	human
Endothelial	Endothelial	IL31	OSMR	IL31 - OSMR	Interleukins	NA	0.174655	NA	-0.270423	NA	0.0811352	NA	NA	Endothelial - Endothelial	Endothelial - IL31 - OSMR - Endothelial	Endothelial - IL31	OSMR - Endothelial	human
Endothelial	Endothelial	IL34	CSF1R	IL34 - CSF1R	Interleukins	0.00227612	0	-0.0143486	-0.0516984	0.00133556	0	0	-0.0330235	Endothelial - Endothelial	Endothelial - IL34 - CSF1R - Endothelial	Endothelial - IL34	CSF1R - Endothelial	human
Endothelial	Endothelial	IL3	CSF2RB	IL3 - CSF2RB	Interleukins	NA	0.168944	NA	0.176394	NA	0.0884808	NA	NA	Endothelial - Endothelial	Endothelial - IL3 - CSF2RB - Endothelial	Endothelial - IL3	CSF2RB - Endothelial	human
Endothelial	Endothelial	IL3	IL3RA	IL3 - IL3RA	Interleukins	NA	0.267837	NA	0.219742	NA	0.129716	NA	NA	Endothelial - Endothelial	Endothelial - IL3 - IL3RA - Endothelial	Endothelial - IL3	IL3RA - Endothelial	human
Endothelial	Endothelial	IL4	CD53	IL4 - CD53	Interleukins	0	0.000176105	0	-0.0313981	0	0.000166945	0	-0.0156991	Endothelial - Endothelial	Endothelial - IL4 - CD53 - Endothelial	Endothelial - IL4	CD53 - Endothelial	human
Endothelial	Endothelial	IL4	IL13RA1	IL4 - IL13RA1	Interleukins	0	0.417564	0	0.0197254	0	0.211686	0	0.00986271	Endothelial - Endothelial	Endothelial - IL4 - IL13RA1 - Endothelial	Endothelial - IL4	IL13RA1 - Endothelial	human
Endothelial	Endothelial	IL4	IL13RA2	IL4 - IL13RA2	Interleukins	0	0.00484585	0	-0.0820934	0	0.00250417	0	-0.0410467	Endothelial - Endothelial	Endothelial - IL4 - IL13RA2 - Endothelial	Endothelial - IL4	IL13RA2 - Endothelial	human
Endothelial	Endothelial	IL4	IL2RG	IL4 - IL2RG	Interleukins	0	0.000460411	0	-0.0173822	0	0.00033389	0	-0.0086911	Endothelial - Endothelial	Endothelial - IL4 - IL2RG - Endothelial	Endothelial - IL4	IL2RG - Endothelial	human
Endothelial	Endothelial	IL4	IL4R	IL4 - IL4R	Interleukins	0	0.226662	0	0.0127757	0	0.112354	0	0.00638786	Endothelial - Endothelial	Endothelial - IL4 - IL4R - Endothelial	Endothelial - IL4	IL4R - Endothelial	human
Endothelial	Endothelial	IL5	CSF2RB	IL5 - CSF2RB	Interleukins	NA	0.168944	NA	0.176394	NA	0.0884808	NA	NA	Endothelial - Endothelial	Endothelial - IL5 - CSF2RB - Endothelial	Endothelial - IL5	CSF2RB - Endothelial	human
Endothelial	Endothelial	IL5	IL5RA	IL5 - IL5RA	Interleukins	NA	NA	NA	NA	NA	NA	NA	NA	Endothelial - Endothelial	Endothelial - IL5 - IL5RA - Endothelial	Endothelial - IL5	IL5RA - Endothelial	human
Endothelial	Endothelial	IL6	F3	IL6 - F3	Interleukins	0.043919	0.0890901	-0.0564611	-0.250828	0.0227045	0.030384	0.00391275	-0.153645	Endothelial - Endothelial	Endothelial - IL6 - F3 - Endothelial	Endothelial - IL6	F3 - Endothelial	human
Endothelial	Endothelial	IL6	IL6R	IL6 - IL6R	Interleukins	0.043919	0.0402667	-0.0564611	-0.0901196	0.0227045	0.0218698	0.00176848	-0.0732904	Endothelial - Endothelial	Endothelial - IL6 - IL6R - Endothelial	Endothelial - IL6	IL6R - Endothelial	human
Endothelial	Endothelial	IL6	IL6ST	IL6 - IL6ST	Interleukins	0.043919	1.54667	-0.0564611	0.418353	0.0227045	0.701169	0.0679284	0.180946	Endothelial - Endothelial	Endothelial - IL6 - IL6ST - Endothelial	Endothelial - IL6	IL6ST - Endothelial	human
Endothelial	Endothelial	IL7	IL2RG	IL7 - IL2RG	Interleukins	0.00133409	0.000460411	-0.0472484	-0.0173822	0.00100167	0.00033389	6.14228e-07	-0.0323153	Endothelial - Endothelial	Endothelial - IL7 - IL2RG - Endothelial	Endothelial - IL7	IL2RG - Endothelial	human
Endothelial	Endothelial	IL7	IL7R	IL7 - IL7R	Interleukins	0.00133409	0.0352004	-0.0472484	-0.230347	0.00100167	0.0145242	4.69604e-05	-0.138798	Endothelial - Endothelial	Endothelial - IL7 - IL7R - Endothelial	Endothelial - IL7	IL7R - Endothelial	human
Endothelial	Endothelial	IL8	CD79A	IL8 - CD79A	Interleukins	NA	0.000877039	NA	-0.015956	NA	0.000500835	NA	NA	Endothelial - Endothelial	Endothelial - IL8 - CD79A - Endothelial	Endothelial - IL8	CD79A - Endothelial	human
Endothelial	Endothelial	IL8	CXCR1	IL8 - CXCR1	Interleukins	NA	NA	NA	NA	NA	NA	NA	NA	Endothelial - Endothelial	Endothelial - IL8 - CXCR1 - Endothelial	Endothelial - IL8	CXCR1 - Endothelial	human
Endothelial	Endothelial	IL8	CXCR2	IL8 - CXCR2	Interleukins	NA	NA	NA	NA	NA	NA	NA	NA	Endothelial - Endothelial	Endothelial - IL8 - CXCR2 - Endothelial	Endothelial - IL8	CXCR2 - Endothelial	human
Endothelial	Endothelial	IL8	DARC	IL8 - DARC	Interleukins	NA	NA	NA	NA	NA	NA	NA	NA	Endothelial - Endothelial	Endothelial - IL8 - DARC - Endothelial	Endothelial - IL8	DARC - Endothelial	human
Endothelial	Endothelial	IL8	KDR	IL8 - KDR	Interleukins	NA	1.25924	NA	0.499977	NA	0.577629	NA	NA	Endothelial - Endothelial	Endothelial - IL8 - KDR - Endothelial	Endothelial - IL8	KDR - Endothelial	human
Endothelial	Endothelial	IL8	SDC1	IL8 - SDC1	Interleukins	NA	0.0350433	NA	-0.278519	NA	0.0128548	NA	NA	Endothelial - Endothelial	Endothelial - IL8 - SDC1 - Endothelial	Endothelial - IL8	SDC1 - Endothelial	human
Endothelial	Endothelial	IL8	SDC2	IL8 - SDC2	Interleukins	NA	0.0328693	NA	-0.223341	NA	0.0148581	NA	NA	Endothelial - Endothelial	Endothelial - IL8 - SDC2 - Endothelial	Endothelial - IL8	SDC2 - Endothelial	human
Endothelial	Endothelial	IL8	SDC3	IL8 - SDC3	Interleukins	NA	0.0938629	NA	0.0312627	NA	0.0504174	NA	NA	Endothelial - Endothelial	Endothelial - IL8 - SDC3 - Endothelial	Endothelial - IL8	SDC3 - Endothelial	human
Endothelial	Endothelial	IL9	IL2RG	IL9 - IL2RG	Interleukins	NA	0.000460411	NA	-0.0173822	NA	0.00033389	NA	NA	Endothelial - Endothelial	Endothelial - IL9 - IL2RG - Endothelial	Endothelial - IL9	IL2RG - Endothelial	human
Endothelial	Endothelial	IL9	IL9R	IL9 - IL9R	Interleukins	NA	0	NA	-0.0121899	NA	0	NA	NA	Endothelial - Endothelial	Endothelial - IL9 - IL9R - Endothelial	Endothelial - IL9	IL9R - Endothelial	human
Endothelial	Endothelial	INHA	ACVR1	INHA - ACVR1	UNCAT	0	0.105993	-0.0288744	-0.0187219	0	0.0580968	0	-0.0237981	Endothelial - Endothelial	Endothelial - INHA - ACVR1 - Endothelial	Endothelial - INHA	ACVR1 - Endothelial	human
Endothelial	Endothelial	INHA	ACVR1B	INHA - ACVR1B	UNCAT	0	0.0820667	-0.0288744	0.0309063	0	0.0460768	0	0.00101594	Endothelial - Endothelial	Endothelial - INHA - ACVR1B - Endothelial	Endothelial - INHA	ACVR1B - Endothelial	human
Endothelial	Endothelial	INHA	ACVR2A	INHA - ACVR2A	UNCAT	0	0.0908898	-0.0288744	0.0372982	0	0.0474124	0	0.00421188	Endothelial - Endothelial	Endothelial - INHA - ACVR2A - Endothelial	Endothelial - INHA	ACVR2A - Endothelial	human
Endothelial	Endothelial	INHA	ACVR2B	INHA - ACVR2B	UNCAT	0	0.0650963	-0.0288744	0.0257092	0	0.0322204	0	-0.00158261	Endothelial - Endothelial	Endothelial - INHA - ACVR2B - Endothelial	Endothelial - INHA	ACVR2B - Endothelial	human
Endothelial	Endothelial	INHA	TGFBR3	INHA - TGFBR3	UNCAT	0	0.203863	-0.0288744	0.174699	0	0.100835	0	0.0729124	Endothelial - Endothelial	Endothelial - INHA - TGFBR3 - Endothelial	Endothelial - INHA	TGFBR3 - Endothelial	human
Endothelial	Endothelial	INHBA	ACVR1	INHBA - ACVR1	TGFB	0.262633	0.105993	-0.350199	-0.0187219	0.0956594	0.0580968	0.0278372	-0.18446	Endothelial - Endothelial	Endothelial - INHBA - ACVR1 - Endothelial	Endothelial - INHBA	ACVR1 - Endothelial	human
Endothelial	Endothelial	INHBA	ACVR1B	INHBA - ACVR1B	TGFB	0.262633	0.0820667	-0.350199	0.0309063	0.0956594	0.0460768	0.0215534	-0.159646	Endothelial - Endothelial	Endothelial - INHBA - ACVR1B - Endothelial	Endothelial - INHBA	ACVR1B - Endothelial	human
Endothelial	Endothelial	INHBA	ACVR2A	INHBA - ACVR2A	TGFB	0.262633	0.0908898	-0.350199	0.0372982	0.0956594	0.0474124	0.0238707	-0.15645	Endothelial - Endothelial	Endothelial - INHBA - ACVR2A - Endothelial	Endothelial - INHBA	ACVR2A - Endothelial	human
Endothelial	Endothelial	INHBA	ACVR2B	INHBA - ACVR2B	TGFB	0.262633	0.0650963	-0.350199	0.0257092	0.0956594	0.0322204	0.0170965	-0.162245	Endothelial - Endothelial	Endothelial - INHBA - ACVR2B - Endothelial	Endothelial - INHBA	ACVR2B - Endothelial	human
Endothelial	Endothelial	INHBA	BAMBI	INHBA - BAMBI	TGFB	0.262633	0.0108013	-0.350199	-0.0156705	0.0956594	0.0066778	0.00283678	-0.182935	Endothelial - Endothelial	Endothelial - INHBA - BAMBI - Endothelial	Endothelial - INHBA	BAMBI - Endothelial	human
Endothelial	Endothelial	INHBA	ENG	INHBA - ENG	TGFB	0.262633	1.26612	-0.350199	0.46191	0.0956594	0.610017	0.332525	0.0558558	Endothelial - Endothelial	Endothelial - INHBA - ENG - Endothelial	Endothelial - INHBA	ENG - Endothelial	human
Endothelial	Endothelial	INHBA	TGFBR3	INHBA - TGFBR3	TGFB	0.262633	0.203863	-0.350199	0.174699	0.0956594	0.100835	0.0535413	-0.0877497	Endothelial - Endothelial	Endothelial - INHBA - TGFBR3 - Endothelial	Endothelial - INHBA	TGFBR3 - Endothelial	human
Endothelial	Endothelial	INHBB	ACVR1	INHBB - ACVR1	TGFB	0.317261	0.105993	0.195857	-0.0187219	0.134725	0.0580968	0.0336273	0.0885675	Endothelial - Endothelial	Endothelial - INHBB - ACVR1 - Endothelial	Endothelial - INHBB	ACVR1 - Endothelial	human
Endothelial	Endothelial	INHBB	ACVR1B	INHBB - ACVR1B	TGFB	0.317261	0.0820667	0.195857	0.0309063	0.134725	0.0460768	0.0260366	0.113382	Endothelial - Endothelial	Endothelial - INHBB - ACVR1B - Endothelial	Endothelial - INHBB	ACVR1B - Endothelial	human
Endothelial	Endothelial	INHBB	ACVR1C	INHBB - ACVR1C	TGFB	0.317261	0.00079811	0.195857	-0.0548809	0.134725	0.00033389	0.000253209	0.0704879	Endothelial - Endothelial	Endothelial - INHBB - ACVR1C - Endothelial	Endothelial - INHBB	ACVR1C - Endothelial	human
Endothelial	Endothelial	INHBB	ACVR2A	INHBB - ACVR2A	TGFB	0.317261	0.0908898	0.195857	0.0372982	0.134725	0.0474124	0.0288358	0.116577	Endothelial - Endothelial	Endothelial - INHBB - ACVR2A - Endothelial	Endothelial - INHBB	ACVR2A - Endothelial	human
Endothelial	Endothelial	INHBB	ACVR2B	INHBB - ACVR2B	TGFB	0.317261	0.0650963	0.195857	0.0257092	0.134725	0.0322204	0.0206525	0.110783	Endothelial - Endothelial	Endothelial - INHBB - ACVR2B - Endothelial	Endothelial - INHBB	ACVR2B - Endothelial	human
Endothelial	Endothelial	INHBC	ACVR1	INHBC - ACVR1	UNCAT	NA	0.105993	NA	-0.0187219	NA	0.0580968	NA	NA	Endothelial - Endothelial	Endothelial - INHBC - ACVR1 - Endothelial	Endothelial - INHBC	ACVR1 - Endothelial	human
Endothelial	Endothelial	INHBC	ACVR1B	INHBC - ACVR1B	UNCAT	NA	0.0820667	NA	0.0309063	NA	0.0460768	NA	NA	Endothelial - Endothelial	Endothelial - INHBC - ACVR1B - Endothelial	Endothelial - INHBC	ACVR1B - Endothelial	human
Endothelial	Endothelial	INHBC	ACVR2A	INHBC - ACVR2A	UNCAT	NA	0.0908898	NA	0.0372982	NA	0.0474124	NA	NA	Endothelial - Endothelial	Endothelial - INHBC - ACVR2A - Endothelial	Endothelial - INHBC	ACVR2A - Endothelial	human
Endothelial	Endothelial	INHBC	ACVR2B	INHBC - ACVR2B	UNCAT	NA	0.0650963	NA	0.0257092	NA	0.0322204	NA	NA	Endothelial - Endothelial	Endothelial - INHBC - ACVR2B - Endothelial	Endothelial - INHBC	ACVR2B - Endothelial	human
Endothelial	Endothelial	INHBE	ACVR1	INHBE - ACVR1	UNCAT	0	0.105993	-0.0299903	-0.0187219	0	0.0580968	0	-0.0243561	Endothelial - Endothelial	Endothelial - INHBE - ACVR1 - Endothelial	Endothelial - INHBE	ACVR1 - Endothelial	human
Endothelial	Endothelial	INHBE	ACVR1B	INHBE - ACVR1B	UNCAT	0	0.0820667	-0.0299903	0.0309063	0	0.0460768	0	0.00045797	Endothelial - Endothelial	Endothelial - INHBE - ACVR1B - Endothelial	Endothelial - INHBE	ACVR1B - Endothelial	human
Endothelial	Endothelial	INHBE	ACVR2A	INHBE - ACVR2A	UNCAT	0	0.0908898	-0.0299903	0.0372982	0	0.0474124	0	0.00365391	Endothelial - Endothelial	Endothelial - INHBE - ACVR2A - Endothelial	Endothelial - INHBE	ACVR2A - Endothelial	human
Endothelial	Endothelial	INHBE	ENG	INHBE - ENG	UNCAT	0	1.26612	-0.0299903	0.46191	0	0.610017	0	0.21596	Endothelial - Endothelial	Endothelial - INHBE - ENG - Endothelial	Endothelial - INHBE	ENG - Endothelial	human
Endothelial	Endothelial	INSL3	RXFP2	INSL3 - RXFP2	UNCAT	0.00247844	NA	-0.0190561	NA	0.00100167	NA	NA	NA	Endothelial - Endothelial	Endothelial - INSL3 - RXFP2 - Endothelial	Endothelial - INSL3	RXFP2 - Endothelial	human
Endothelial	Endothelial	INSL5	RXFP3	INSL5 - RXFP3	UNCAT	0	0	-0.0128243	-0.0123197	0	0	0	-0.012572	Endothelial - Endothelial	Endothelial - INSL5 - RXFP3 - Endothelial	Endothelial - INSL5	RXFP3 - Endothelial	human
Endothelial	Endothelial	INSL5	RXFP4	INSL5 - RXFP4	UNCAT	0	NA	-0.0128243	NA	0	NA	NA	NA	Endothelial - Endothelial	Endothelial - INSL5 - RXFP4 - Endothelial	Endothelial - INSL5	RXFP4 - Endothelial	human
Endothelial	Endothelial	INS	IGF1R	INS - IGF1R	UNCAT	NA	0.288791	NA	0.105434	NA	0.15192	NA	NA	Endothelial - Endothelial	Endothelial - INS - IGF1R - Endothelial	Endothelial - INS	IGF1R - Endothelial	human
Endothelial	Endothelial	INS	INSR	INS - INSR	UNCAT	NA	0.753284	NA	0.254728	NA	0.275626	NA	NA	Endothelial - Endothelial	Endothelial - INS - INSR - Endothelial	Endothelial - INS	INSR - Endothelial	human
Endothelial	Endothelial	INS	LRP2	INS - LRP2	UNCAT	NA	0	NA	-0.027502	NA	0	NA	NA	Endothelial - Endothelial	Endothelial - INS - LRP2 - Endothelial	Endothelial - INS	LRP2 - Endothelial	human
Endothelial	Endothelial	ITGB3BP	ITGB3	ITGB3BP - ITGB3	UNCAT	0.251547	0.0218954	-0.118009	-0.0518058	0.133222	0.0135225	0.00550771	-0.0849074	Endothelial - Endothelial	Endothelial - ITGB3BP - ITGB3 - Endothelial	Endothelial - ITGB3BP	ITGB3 - Endothelial	human
Endothelial	Endothelial	ITGB3BP	ITGB5	ITGB3BP - ITGB5	UNCAT	0.251547	0.172209	-0.118009	-0.0829851	0.133222	0.0863105	0.0433186	-0.100497	Endothelial - Endothelial	Endothelial - ITGB3BP - ITGB5 - Endothelial	Endothelial - ITGB3BP	ITGB5 - Endothelial	human
Endothelial	Endothelial	ITIH2	FCER1A	ITIH2 - FCER1A	UNCAT	0	0	0	-0.0177435	0	0	0	-0.00887173	Endothelial - Endothelial	Endothelial - ITIH2 - FCER1A - Endothelial	Endothelial - ITIH2	FCER1A - Endothelial	human
Endothelial	Endothelial	JAG1	NOTCH1	JAG1 - NOTCH1	NOTCH	0.130534	0.364756	-0.00774338	0.227751	0.0681135	0.181135	0.0476129	0.110004	Endothelial - Endothelial	Endothelial - JAG1 - NOTCH1 - Endothelial	Endothelial - JAG1	NOTCH1 - Endothelial	human
Endothelial	Endothelial	JAG1	NOTCH2	JAG1 - NOTCH2	NOTCH	0.130534	0.063638	-0.00774338	-0.265272	0.0681135	0.0372287	0.0083069	-0.136507	Endothelial - Endothelial	Endothelial - JAG1 - NOTCH2 - Endothelial	Endothelial - JAG1	NOTCH2 - Endothelial	human
Endothelial	Endothelial	JAG1	NOTCH3	JAG1 - NOTCH3	NOTCH	0.130534	0.028917	-0.00774338	-0.237327	0.0681135	0.0111853	0.00377464	-0.122535	Endothelial - Endothelial	Endothelial - JAG1 - NOTCH3 - Endothelial	Endothelial - JAG1	NOTCH3 - Endothelial	human
Endothelial	Endothelial	JAG1	NOTCH4	JAG1 - NOTCH4	NOTCH	0.130534	0.648718	-0.00774338	0.315057	0.0681135	0.295659	0.0846795	0.153657	Endothelial - Endothelial	Endothelial - JAG1 - NOTCH4 - Endothelial	Endothelial - JAG1	NOTCH4 - Endothelial	human
Endothelial	Endothelial	JAG2	NOTCH1	JAG2 - NOTCH1	NOTCH	0.446389	0.364756	0.234025	0.227751	0.211519	0.181135	0.162823	0.230888	Endothelial - Endothelial	Endothelial - JAG2 - NOTCH1 - Endothelial	Endothelial - JAG2	NOTCH1 - Endothelial	human
Endothelial	Endothelial	JAG2	NOTCH2	JAG2 - NOTCH2	NOTCH	0.446389	0.063638	0.234025	-0.265272	0.211519	0.0372287	0.0284073	-0.0156235	Endothelial - Endothelial	Endothelial - JAG2 - NOTCH2 - Endothelial	Endothelial - JAG2	NOTCH2 - Endothelial	human
Endothelial	Endothelial	JAG2	NOTCH3	JAG2 - NOTCH3	NOTCH	0.446389	0.028917	0.234025	-0.237327	0.211519	0.0111853	0.0129082	-0.00165145	Endothelial - Endothelial	Endothelial - JAG2 - NOTCH3 - Endothelial	Endothelial - JAG2	NOTCH3 - Endothelial	human
Endothelial	Endothelial	JAG2	NOTCH4	JAG2 - NOTCH4	NOTCH	0.446389	0.648718	0.234025	0.315057	0.211519	0.295659	0.289581	0.274541	Endothelial - Endothelial	Endothelial - JAG2 - NOTCH4 - Endothelial	Endothelial - JAG2	NOTCH4 - Endothelial	human
Endothelial	Endothelial	KAL1	FGFR1	KAL1 - FGFR1	FGF	NA	0.616358	NA	0.198752	NA	0.319199	NA	NA	Endothelial - Endothelial	Endothelial - KAL1 - FGFR1 - Endothelial	Endothelial - KAL1	FGFR1 - Endothelial	human
Endothelial	Endothelial	KAL1	SDC2	KAL1 - SDC2	UNCAT	NA	0.0328693	NA	-0.223341	NA	0.0148581	NA	NA	Endothelial - Endothelial	Endothelial - KAL1 - SDC2 - Endothelial	Endothelial - KAL1	SDC2 - Endothelial	human
Endothelial	Endothelial	KISS1	KISS1R	KISS1 - KISS1R	UNCAT	0.0307048	0	-0.0759174	-0.00907144	0.0130217	0	0	-0.0424944	Endothelial - Endothelial	Endothelial - KISS1 - KISS1R - Endothelial	Endothelial - KISS1	KISS1R - Endothelial	human
Endothelial	Endothelial	KISS1	MMP24	KISS1 - MMP24	UNCAT	0.0307048	0.0022144	-0.0759174	-0.0220793	0.0130217	0.00116861	6.79928e-05	-0.0489983	Endothelial - Endothelial	Endothelial - KISS1 - MMP24 - Endothelial	Endothelial - KISS1	MMP24 - Endothelial	human
Endothelial	Endothelial	KITLG	EPOR	KITLG - EPOR	UNCAT	0.0778705	0.137515	-0.164515	0.0964952	0.0412354	0.0639399	0.0107084	-0.0340101	Endothelial - Endothelial	Endothelial - KITLG - EPOR - Endothelial	Endothelial - KITLG	EPOR - Endothelial	human
Endothelial	Endothelial	KITLG	KIT	KITLG - KIT	KIT	0.0778705	0.530196	-0.164515	0.298215	0.0412354	0.230217	0.0412866	0.0668497	Endothelial - Endothelial	Endothelial - KITLG - KIT - Endothelial	Endothelial - KITLG	KIT - Endothelial	human
Endothelial	Endothelial	KLK3	EPOR	KLK3 - EPOR	UNCAT	NA	0.137515	NA	0.0964952	NA	0.0639399	NA	NA	Endothelial - Endothelial	Endothelial - KLK3 - EPOR - Endothelial	Endothelial - KLK3	EPOR - Endothelial	human
Endothelial	Endothelial	KNG1	BDKRB1	KNG1 - BDKRB1	Vasoactive	NA	0.000743814	NA	-0.10047	NA	0.000500835	NA	NA	Endothelial - Endothelial	Endothelial - KNG1 - BDKRB1 - Endothelial	Endothelial - KNG1	BDKRB1 - Endothelial	human
Endothelial	Endothelial	KNG1	BDKRB2	KNG1 - BDKRB2	Vasoactive	NA	0.00535563	NA	-0.113821	NA	0.00200334	NA	NA	Endothelial - Endothelial	Endothelial - KNG1 - BDKRB2 - Endothelial	Endothelial - KNG1	BDKRB2 - Endothelial	human
Endothelial	Endothelial	KNG1	CD93	KNG1 - CD93	Vasoactive	NA	1.85847	NA	0.66672	NA	0.782638	NA	NA	Endothelial - Endothelial	Endothelial - KNG1 - CD93 - Endothelial	Endothelial - KNG1	CD93 - Endothelial	human
Endothelial	Endothelial	KNG1	GP1BA	KNG1 - GP1BA	Vasoactive	NA	0.00191707	NA	-0.00740047	NA	0.000166945	NA	NA	Endothelial - Endothelial	Endothelial - KNG1 - GP1BA - Endothelial	Endothelial - KNG1	GP1BA - Endothelial	human
Endothelial	Endothelial	KNG1	GPR135	KNG1 - GPR135	Vasoactive	NA	0.0315041	NA	-0.0302407	NA	0.01202	NA	NA	Endothelial - Endothelial	Endothelial - KNG1 - GPR135 - Endothelial	Endothelial - KNG1	GPR135 - Endothelial	human
Endothelial	Endothelial	KNG1	ITGAM	KNG1 - ITGAM	Vasoactive	NA	0.000220423	NA	-0.0131065	NA	0.000166945	NA	NA	Endothelial - Endothelial	Endothelial - KNG1 - ITGAM - Endothelial	Endothelial - KNG1	ITGAM - Endothelial	human
Endothelial	Endothelial	KNG1	ITGB2	KNG1 - ITGB2	Vasoactive	NA	0.0111766	NA	-0.176937	NA	0.00417362	NA	NA	Endothelial - Endothelial	Endothelial - KNG1 - ITGB2 - Endothelial	Endothelial - KNG1	ITGB2 - Endothelial	human
Endothelial	Endothelial	KNG1	PLAUR	KNG1 - PLAUR	Vasoactive	NA	0.317464	NA	-0.206125	NA	0.155593	NA	NA	Endothelial - Endothelial	Endothelial - KNG1 - PLAUR - Endothelial	Endothelial - KNG1	PLAUR - Endothelial	human
Endothelial	Endothelial	KNG1	RXFP4	KNG1 - RXFP4	Vasoactive	NA	NA	NA	NA	NA	NA	NA	NA	Endothelial - Endothelial	Endothelial - KNG1 - RXFP4 - Endothelial	Endothelial - KNG1	RXFP4 - Endothelial	human
Endothelial	Endothelial	KNG1	SDC2	KNG1 - SDC2	Vasoactive	NA	0.0328693	NA	-0.223341	NA	0.0148581	NA	NA	Endothelial - Endothelial	Endothelial - KNG1 - SDC2 - Endothelial	Endothelial - KNG1	SDC2 - Endothelial	human
Endothelial	Endothelial	KRTAP4-12	AQP1	KRTAP4-12 - AQP1	UNCAT	NA	0.62821	NA	0.313894	NA	0.253589	NA	NA	Endothelial - Endothelial	Endothelial - KRTAP4-12 - AQP1 - Endothelial	Endothelial - KRTAP4-12	AQP1 - Endothelial	human
Endothelial	Endothelial	KRTAP4-12	CATSPER1	KRTAP4-12 - CATSPER1	UNCAT	NA	0.00562671	NA	-0.10694	NA	0.00233723	NA	NA	Endothelial - Endothelial	Endothelial - KRTAP4-12 - CATSPER1 - Endothelial	Endothelial - KRTAP4-12	CATSPER1 - Endothelial	human
Endothelial	Endothelial	KRTAP4-12	CLDN2	KRTAP4-12 - CLDN2	UNCAT	NA	0	NA	0	NA	0	NA	NA	Endothelial - Endothelial	Endothelial - KRTAP4-12 - CLDN2 - Endothelial	Endothelial - KRTAP4-12	CLDN2 - Endothelial	human
Endothelial	Endothelial	KRTAP4-12	CNTFR	KRTAP4-12 - CNTFR	UNCAT	NA	NA	NA	NA	NA	NA	NA	NA	Endothelial - Endothelial	Endothelial - KRTAP4-12 - CNTFR - Endothelial	Endothelial - KRTAP4-12	CNTFR - Endothelial	human
Endothelial	Endothelial	KRTAP4-12	LINGO1	KRTAP4-12 - LINGO1	UNCAT	NA	0	NA	-0.0124166	NA	0	NA	NA	Endothelial - Endothelial	Endothelial - KRTAP4-12 - LINGO1 - Endothelial	Endothelial - KRTAP4-12	LINGO1 - Endothelial	human
Endothelial	Endothelial	KRTAP4-12	PDGFRB	KRTAP4-12 - PDGFRB	UNCAT	NA	0.0292972	NA	-0.269283	NA	0.0106845	NA	NA	Endothelial - Endothelial	Endothelial - KRTAP4-12 - PDGFRB - Endothelial	Endothelial - KRTAP4-12	PDGFRB - Endothelial	human
Endothelial	Endothelial	KRTAP4-12	PLSCR4	KRTAP4-12 - PLSCR4	UNCAT	NA	0.426289	NA	0.185518	NA	0.214858	NA	NA	Endothelial - Endothelial	Endothelial - KRTAP4-12 - PLSCR4 - Endothelial	Endothelial - KRTAP4-12	PLSCR4 - Endothelial	human
Endothelial	Endothelial	L1CAM	CNTN1	L1CAM - CNTN1	UNCAT	0.000434545	0	-0.0176015	0	0.000166945	0	0	-0.00880073	Endothelial - Endothelial	Endothelial - L1CAM - CNTN1 - Endothelial	Endothelial - L1CAM	CNTN1 - Endothelial	human
Endothelial	Endothelial	L1CAM	EGFR	L1CAM - EGFR	EGF	0.000434545	0.0549946	-0.0176015	-0.344129	0.000166945	0.0245409	2.38976e-05	-0.180865	Endothelial - Endothelial	Endothelial - L1CAM - EGFR - Endothelial	Endothelial - L1CAM	EGFR - Endothelial	human
Endothelial	Endothelial	L1CAM	EPHB2	L1CAM - EPHB2	UNCAT	0.000434545	0.261865	-0.0176015	0.103122	0.000166945	0.146745	0.000113792	0.0427601	Endothelial - Endothelial	Endothelial - L1CAM - EPHB2 - Endothelial	Endothelial - L1CAM	EPHB2 - Endothelial	human
Endothelial	Endothelial	L1CAM	ERBB2	L1CAM - ERBB2	UNCAT	0.000434545	0.0217755	-0.0176015	-0.180314	0.000166945	0.00984975	9.46242e-06	-0.0989578	Endothelial - Endothelial	Endothelial - L1CAM - ERBB2 - Endothelial	Endothelial - L1CAM	ERBB2 - Endothelial	human
Endothelial	Endothelial	L1CAM	ERBB3	L1CAM - ERBB3	UNCAT	0.000434545	0.0206479	-0.0176015	-0.298583	0.000166945	0.00901503	8.97245e-06	-0.158092	Endothelial - Endothelial	Endothelial - L1CAM - ERBB3 - Endothelial	Endothelial - L1CAM	ERBB3 - Endothelial	human
Endothelial	Endothelial	L1CAM	FGFR2	L1CAM - FGFR2	FGF	0.000434545	0	-0.0176015	-0.0193736	0.000166945	0	0	-0.0184875	Endothelial - Endothelial	Endothelial - L1CAM - FGFR2 - Endothelial	Endothelial - L1CAM	FGFR2 - Endothelial	human
Endothelial	Endothelial	L1CAM	ITGA5	L1CAM - ITGA5	UNCAT	0.000434545	1.13311	-0.0176015	0.244101	0.000166945	0.556928	0.000492385	0.11325	Endothelial - Endothelial	Endothelial - L1CAM - ITGA5 - Endothelial	Endothelial - L1CAM	ITGA5 - Endothelial	human
Endothelial	Endothelial	L1CAM	ITGAV	L1CAM - ITGAV	UNCAT	0.000434545	0.857661	-0.0176015	0.117173	0.000166945	0.425543	0.000372692	0.0497856	Endothelial - Endothelial	Endothelial - L1CAM - ITGAV - Endothelial	Endothelial - L1CAM	ITGAV - Endothelial	human
Endothelial	Endothelial	LACRT	SDC1	LACRT - SDC1	UNCAT	NA	0.0350433	NA	-0.278519	NA	0.0128548	NA	NA	Endothelial - Endothelial	Endothelial - LACRT - SDC1 - Endothelial	Endothelial - LACRT	SDC1 - Endothelial	human
Endothelial	Endothelial	LAMA1	GPC1	LAMA1 - GPC1	Laminins	0.0040859	0.0567324	-0.0902185	-0.215047	0.0015025	0.0262104	0.000231803	-0.152633	Endothelial - Endothelial	Endothelial - LAMA1 - GPC1 - Endothelial	Endothelial - LAMA1	GPC1 - Endothelial	human
Endothelial	Endothelial	LAMA1	ITGA1	LAMA1 - ITGA1	Laminins	0.0040859	0.309819	-0.0902185	-0.0955117	0.0015025	0.134224	0.00126589	-0.0928651	Endothelial - Endothelial	Endothelial - LAMA1 - ITGA1 - Endothelial	Endothelial - LAMA1	ITGA1 - Endothelial	human
Endothelial	Endothelial	LAMA1	ITGA2	LAMA1 - ITGA2	Laminins	0.0040859	0.759539	-0.0902185	0.0792726	0.0015025	0.376294	0.0031034	-0.00547296	Endothelial - Endothelial	Endothelial - LAMA1 - ITGA2 - Endothelial	Endothelial - LAMA1	ITGA2 - Endothelial	human
Endothelial	Endothelial	LAMA1	ITGA3	LAMA1 - ITGA3	Laminins	0.0040859	0.214703	-0.0902185	-0.363692	0.0015025	0.101169	0.000877254	-0.226956	Endothelial - Endothelial	Endothelial - LAMA1 - ITGA3 - Endothelial	Endothelial - LAMA1	ITGA3 - Endothelial	human
Endothelial	Endothelial	LAMA1	ITGA6	LAMA1 - ITGA6	Laminins	0.0040859	1.31566	-0.0902185	0.512845	0.0015025	0.591653	0.00537567	0.211313	Endothelial - Endothelial	Endothelial - LAMA1 - ITGA6 - Endothelial	Endothelial - LAMA1	ITGA6 - Endothelial	human
Endothelial	Endothelial	LAMA1	ITGA7	LAMA1 - ITGA7	Laminins	0.0040859	0.00126098	-0.0902185	-0.0404284	0.0015025	0.000500835	5.15223e-06	-0.0653235	Endothelial - Endothelial	Endothelial - LAMA1 - ITGA7 - Endothelial	Endothelial - LAMA1	ITGA7 - Endothelial	human
Endothelial	Endothelial	LAMA1	ITGB1	LAMA1 - ITGB1	Laminins	0.0040859	2.24898	-0.0902185	0.131115	0.0015025	0.894825	0.00918913	0.0204482	Endothelial - Endothelial	Endothelial - LAMA1 - ITGB1 - Endothelial	Endothelial - LAMA1	ITGB1 - Endothelial	human
Endothelial	Endothelial	LAMA1	ITGB4	LAMA1 - ITGB4	Laminins	0.0040859	0.0299009	-0.0902185	-0.213434	0.0015025	0.0136895	0.000122172	-0.151826	Endothelial - Endothelial	Endothelial - LAMA1 - ITGB4 - Endothelial	Endothelial - LAMA1	ITGB4 - Endothelial	human
Endothelial	Endothelial	LAMA1	ITGB8	LAMA1 - ITGB8	Laminins	0.0040859	0.0208951	-0.0902185	-0.0167671	0.0015025	0.0135225	8.53755e-05	-0.0534928	Endothelial - Endothelial	Endothelial - LAMA1 - ITGB8 - Endothelial	Endothelial - LAMA1	ITGB8 - Endothelial	human
Endothelial	Endothelial	LAMA1	NT5E	LAMA1 - NT5E	Laminins	0.0040859	0.411772	-0.0902185	-0.315751	0.0015025	0.215192	0.00168246	-0.202985	Endothelial - Endothelial	Endothelial - LAMA1 - NT5E - Endothelial	Endothelial - LAMA1	NT5E - Endothelial	human
Endothelial	Endothelial	LAMA1	RPSA	LAMA1 - RPSA	Laminins	0.0040859	2.83936	-0.0902185	-0.342765	0.0015025	0.957262	0.0116014	-0.216492	Endothelial - Endothelial	Endothelial - LAMA1 - RPSA - Endothelial	Endothelial - LAMA1	RPSA - Endothelial	human
Endothelial	Endothelial	LAMA1	SDC2	LAMA1 - SDC2	Laminins	0.0040859	0.0328693	-0.0902185	-0.223341	0.0015025	0.0148581	0.000134301	-0.15678	Endothelial - Endothelial	Endothelial - LAMA1 - SDC2 - Endothelial	Endothelial - LAMA1	SDC2 - Endothelial	human
Endothelial	Endothelial	LAMA1	SDC4	LAMA1 - SDC4	Laminins	0.0040859	0.143708	-0.0902185	-0.386803	0.0015025	0.0676127	0.000587176	-0.238511	Endothelial - Endothelial	Endothelial - LAMA1 - SDC4 - Endothelial	Endothelial - LAMA1	SDC4 - Endothelial	human
Endothelial	Endothelial	LAMA1	TMPRSS6	LAMA1 - TMPRSS6	Laminins	0.0040859	0	-0.0902185	-0.0100779	0.0015025	0	0	-0.0501482	Endothelial - Endothelial	Endothelial - LAMA1 - TMPRSS6 - Endothelial	Endothelial - LAMA1	TMPRSS6 - Endothelial	human
Endothelial	Endothelial	LAMA2	ITGA1	LAMA2 - ITGA1	Laminins	0.0166734	0.309819	-0.0802178	-0.0955117	0.00517529	0.134224	0.00516575	-0.0878647	Endothelial - Endothelial	Endothelial - LAMA2 - ITGA1 - Endothelial	Endothelial - LAMA2	ITGA1 - Endothelial	human
Endothelial	Endothelial	LAMA2	ITGA2	LAMA2 - ITGA2	Laminins	0.0166734	0.759539	-0.0802178	0.0792726	0.00517529	0.376294	0.0126641	-0.000472569	Endothelial - Endothelial	Endothelial - LAMA2 - ITGA2 - Endothelial	Endothelial - LAMA2	ITGA2 - Endothelial	human
Endothelial	Endothelial	LAMA2	ITGA3	LAMA2 - ITGA3	Laminins	0.0166734	0.214703	-0.0802178	-0.363692	0.00517529	0.101169	0.00357983	-0.221955	Endothelial - Endothelial	Endothelial - LAMA2 - ITGA3 - Endothelial	Endothelial - LAMA2	ITGA3 - Endothelial	human
Endothelial	Endothelial	LAMA2	ITGA6	LAMA2 - ITGA6	Laminins	0.0166734	1.31566	-0.0802178	0.512845	0.00517529	0.591653	0.0219366	0.216314	Endothelial - Endothelial	Endothelial - LAMA2 - ITGA6 - Endothelial	Endothelial - LAMA2	ITGA6 - Endothelial	human
Endothelial	Endothelial	LAMA2	ITGA7	LAMA2 - ITGA7	Laminins	0.0166734	0.00126098	-0.0802178	-0.0404284	0.00517529	0.000500835	2.10248e-05	-0.0603231	Endothelial - Endothelial	Endothelial - LAMA2 - ITGA7 - Endothelial	Endothelial - LAMA2	ITGA7 - Endothelial	human
Endothelial	Endothelial	LAMA2	ITGB1	LAMA2 - ITGB1	Laminins	0.0166734	2.24898	-0.0802178	0.131115	0.00517529	0.894825	0.0374983	0.0254485	Endothelial - Endothelial	Endothelial - LAMA2 - ITGB1 - Endothelial	Endothelial - LAMA2	ITGB1 - Endothelial	human
Endothelial	Endothelial	LAMA2	ITGB4	LAMA2 - ITGB4	Laminins	0.0166734	0.0299009	-0.0802178	-0.213434	0.00517529	0.0136895	0.00049855	-0.146826	Endothelial - Endothelial	Endothelial - LAMA2 - ITGB4 - Endothelial	Endothelial - LAMA2	ITGB4 - Endothelial	human
Endothelial	Endothelial	LAMA2	RPSA	LAMA2 - RPSA	Laminins	0.0166734	2.83936	-0.0802178	-0.342765	0.00517529	0.957262	0.0473419	-0.211492	Endothelial - Endothelial	Endothelial - LAMA2 - RPSA - Endothelial	Endothelial - LAMA2	RPSA - Endothelial	human
Endothelial	Endothelial	LAMA3	SDC2	LAMA3 - SDC2	Laminins	0.0172827	0.0328693	-0.0862336	-0.223341	0.00701169	0.0148581	0.000568071	-0.154787	Endothelial - Endothelial	Endothelial - LAMA3 - SDC2 - Endothelial	Endothelial - LAMA3	SDC2 - Endothelial	human
Endothelial	Endothelial	LAMA4	ITGA3	LAMA4 - ITGA3	Laminins	1.81338	0.214703	0.562263	-0.363692	0.797496	0.101169	0.389337	0.099285	Endothelial - Endothelial	Endothelial - LAMA4 - ITGA3 - Endothelial	Endothelial - LAMA4	ITGA3 - Endothelial	human
Endothelial	Endothelial	LAMA4	ITGA6	LAMA4 - ITGA6	Laminins	1.81338	1.31566	0.562263	0.512845	0.797496	0.591653	2.3858	0.537554	Endothelial - Endothelial	Endothelial - LAMA4 - ITGA6 - Endothelial	Endothelial - LAMA4	ITGA6 - Endothelial	human
Endothelial	Endothelial	LAMA4	ITGAV	LAMA4 - ITGAV	Laminins	1.81338	0.857661	0.562263	0.117173	0.797496	0.425543	1.55526	0.339718	Endothelial - Endothelial	Endothelial - LAMA4 - ITGAV - Endothelial	Endothelial - LAMA4	ITGAV - Endothelial	human
Endothelial	Endothelial	LAMA4	ITGB1	LAMA4 - ITGB1	Laminins	1.81338	2.24898	0.562263	0.131115	0.797496	0.894825	4.07826	0.346689	Endothelial - Endothelial	Endothelial - LAMA4 - ITGB1 - Endothelial	Endothelial - LAMA4	ITGB1 - Endothelial	human
Endothelial	Endothelial	LAMA5	BCAM	LAMA5 - BCAM	Laminins	0.146536	0.253071	-0.00426894	0.118166	0.0686144	0.113189	0.0370841	0.0569483	Endothelial - Endothelial	Endothelial - LAMA5 - BCAM - Endothelial	Endothelial - LAMA5	BCAM - Endothelial	human
Endothelial	Endothelial	LAMA5	ITGA2	LAMA5 - ITGA2	Laminins	0.146536	0.759539	-0.00426894	0.0792726	0.0686144	0.376294	0.1113	0.0375018	Endothelial - Endothelial	Endothelial - LAMA5 - ITGA2 - Endothelial	Endothelial - LAMA5	ITGA2 - Endothelial	human
Endothelial	Endothelial	LAMA5	ITGA3	LAMA5 - ITGA3	Laminins	0.146536	0.214703	-0.00426894	-0.363692	0.0686144	0.101169	0.0314617	-0.183981	Endothelial - Endothelial	Endothelial - LAMA5 - ITGA3 - Endothelial	Endothelial - LAMA5	ITGA3 - Endothelial	human
Endothelial	Endothelial	LAMA5	ITGA6	LAMA5 - ITGA6	Laminins	0.146536	1.31566	-0.00426894	0.512845	0.0686144	0.591653	0.192792	0.254288	Endothelial - Endothelial	Endothelial - LAMA5 - ITGA6 - Endothelial	Endothelial - LAMA5	ITGA6 - Endothelial	human
Endothelial	Endothelial	LAMA5	ITGB1	LAMA5 - ITGB1	Laminins	0.146536	2.24898	-0.00426894	0.131115	0.0686144	0.894825	0.329557	0.063423	Endothelial - Endothelial	Endothelial - LAMA5 - ITGB1 - Endothelial	Endothelial - LAMA5	ITGB1 - Endothelial	human
Endothelial	Endothelial	LAMA5	ITGB4	LAMA5 - ITGB4	Laminins	0.146536	0.0299009	-0.00426894	-0.213434	0.0686144	0.0136895	0.00438155	-0.108851	Endothelial - Endothelial	Endothelial - LAMA5 - ITGB4 - Endothelial	Endothelial - LAMA5	ITGB4 - Endothelial	human
Endothelial	Endothelial	LAMA5	SDC1	LAMA5 - SDC1	Laminins	0.146536	0.0350433	-0.00426894	-0.278519	0.0686144	0.0128548	0.0051351	-0.141394	Endothelial - Endothelial	Endothelial - LAMA5 - SDC1 - Endothelial	Endothelial - LAMA5	SDC1 - Endothelial	human
Endothelial	Endothelial	LAMB1	ITGA1	LAMB1 - ITGA1	Laminins	1.18453	0.309819	0.339447	-0.0955117	0.573623	0.134224	0.366989	0.121968	Endothelial - Endothelial	Endothelial - LAMB1 - ITGA1 - Endothelial	Endothelial - LAMB1	ITGA1 - Endothelial	human
Endothelial	Endothelial	LAMB1	ITGA2	LAMB1 - ITGA2	Laminins	1.18453	0.759539	0.339447	0.0792726	0.573623	0.376294	0.899695	0.20936	Endothelial - Endothelial	Endothelial - LAMB1 - ITGA2 - Endothelial	Endothelial - LAMB1	ITGA2 - Endothelial	human
Endothelial	Endothelial	LAMB1	ITGA3	LAMB1 - ITGA3	Laminins	1.18453	0.214703	0.339447	-0.363692	0.573623	0.101169	0.254321	-0.0121228	Endothelial - Endothelial	Endothelial - LAMB1 - ITGA3 - Endothelial	Endothelial - LAMB1	ITGA3 - Endothelial	human
Endothelial	Endothelial	LAMB1	ITGA6	LAMB1 - ITGA6	Laminins	1.18453	1.31566	0.339447	0.512845	0.573623	0.591653	1.55844	0.426146	Endothelial - Endothelial	Endothelial - LAMB1 - ITGA6 - Endothelial	Endothelial - LAMB1	ITGA6 - Endothelial	human
Endothelial	Endothelial	LAMB1	ITGA7	LAMB1 - ITGA7	Laminins	1.18453	0.00126098	0.339447	-0.0404284	0.573623	0.000500835	0.00149366	0.149509	Endothelial - Endothelial	Endothelial - LAMB1 - ITGA7 - Endothelial	Endothelial - LAMB1	ITGA7 - Endothelial	human
Endothelial	Endothelial	LAMB1	ITGAV	LAMB1 - ITGAV	Laminins	1.18453	0.857661	0.339447	0.117173	0.573623	0.425543	1.01592	0.22831	Endothelial - Endothelial	Endothelial - LAMB1 - ITGAV - Endothelial	Endothelial - LAMB1	ITGAV - Endothelial	human
Endothelial	Endothelial	LAMB1	ITGB1	LAMB1 - ITGB1	Laminins	1.18453	2.24898	0.339447	0.131115	0.573623	0.894825	2.66398	0.235281	Endothelial - Endothelial	Endothelial - LAMB1 - ITGB1 - Endothelial	Endothelial - LAMB1	ITGB1 - Endothelial	human
Endothelial	Endothelial	LAMB1	ITGB4	LAMB1 - ITGB4	Laminins	1.18453	0.0299009	0.339447	-0.213434	0.573623	0.0136895	0.0354184	0.0630066	Endothelial - Endothelial	Endothelial - LAMB1 - ITGB4 - Endothelial	Endothelial - LAMB1	ITGB4 - Endothelial	human
Endothelial	Endothelial	LAMB2	RPSA	LAMB2 - RPSA	Laminins	0.544491	2.83936	0.168802	-0.342765	0.274457	0.957262	1.54601	-0.0869819	Endothelial - Endothelial	Endothelial - LAMB2 - RPSA - Endothelial	Endothelial - LAMB2	RPSA - Endothelial	human
Endothelial	Endothelial	LAMB3	CD151	LAMB3 - CD151	Laminins	0.0900613	0.950174	-0.233504	-0.23428	0.0365609	0.476127	0.0855739	-0.233892	Endothelial - Endothelial	Endothelial - LAMB3 - CD151 - Endothelial	Endothelial - LAMB3	CD151 - Endothelial	human
Endothelial	Endothelial	LAMB3	COL17A1	LAMB3 - COL17A1	Laminins	0.0900613	0.00398153	-0.233504	-0.0323242	0.0365609	0.0033389	0.000358582	-0.132914	Endothelial - Endothelial	Endothelial - LAMB3 - COL17A1 - Endothelial	Endothelial - LAMB3	COL17A1 - Endothelial	human
Endothelial	Endothelial	LAMB3	ITGA2	LAMB3 - ITGA2	Laminins	0.0900613	0.759539	-0.233504	0.0792726	0.0365609	0.376294	0.068405	-0.0771155	Endothelial - Endothelial	Endothelial - LAMB3 - ITGA2 - Endothelial	Endothelial - LAMB3	ITGA2 - Endothelial	human
Endothelial	Endothelial	LAMB3	ITGA3	LAMB3 - ITGA3	Laminins	0.0900613	0.214703	-0.233504	-0.363692	0.0365609	0.101169	0.0193364	-0.298598	Endothelial - Endothelial	Endothelial - LAMB3 - ITGA3 - Endothelial	Endothelial - LAMB3	ITGA3 - Endothelial	human
Endothelial	Endothelial	LAMB3	ITGA6	LAMB3 - ITGA6	Laminins	0.0900613	1.31566	-0.233504	0.512845	0.0365609	0.591653	0.11849	0.139671	Endothelial - Endothelial	Endothelial - LAMB3 - ITGA6 - Endothelial	Endothelial - LAMB3	ITGA6 - Endothelial	human
Endothelial	Endothelial	LAMB3	ITGB1	LAMB3 - ITGB1	Laminins	0.0900613	2.24898	-0.233504	0.131115	0.0365609	0.894825	0.202546	-0.0511944	Endothelial - Endothelial	Endothelial - LAMB3 - ITGB1 - Endothelial	Endothelial - LAMB3	ITGB1 - Endothelial	human
Endothelial	Endothelial	LAMB3	ITGB4	LAMB3 - ITGB4	Laminins	0.0900613	0.0299009	-0.233504	-0.213434	0.0365609	0.0136895	0.00269291	-0.223469	Endothelial - Endothelial	Endothelial - LAMB3 - ITGB4 - Endothelial	Endothelial - LAMB3	ITGB4 - Endothelial	human
Endothelial	Endothelial	LAMC1	ITGA1	LAMC1 - ITGA1	Laminins	1.28123	0.309819	0.306542	-0.0955117	0.624875	0.134224	0.39695	0.105515	Endothelial - Endothelial	Endothelial - LAMC1 - ITGA1 - Endothelial	Endothelial - LAMC1	ITGA1 - Endothelial	human
Endothelial	Endothelial	LAMC1	ITGA2	LAMC1 - ITGA2	Laminins	1.28123	0.759539	0.306542	0.0792726	0.624875	0.376294	0.973147	0.192907	Endothelial - Endothelial	Endothelial - LAMC1 - ITGA2 - Endothelial	Endothelial - LAMC1	ITGA2 - Endothelial	human
Endothelial	Endothelial	LAMC1	ITGA3	LAMC1 - ITGA3	Laminins	1.28123	0.214703	0.306542	-0.363692	0.624875	0.101169	0.275084	-0.0285755	Endothelial - Endothelial	Endothelial - LAMC1 - ITGA3 - Endothelial	Endothelial - LAMC1	ITGA3 - Endothelial	human
Endothelial	Endothelial	LAMC1	ITGA6	LAMC1 - ITGA6	Laminins	1.28123	1.31566	0.306542	0.512845	0.624875	0.591653	1.68567	0.409693	Endothelial - Endothelial	Endothelial - LAMC1 - ITGA6 - Endothelial	Endothelial - LAMC1	ITGA6 - Endothelial	human
Endothelial	Endothelial	LAMC1	ITGA7	LAMC1 - ITGA7	Laminins	1.28123	0.00126098	0.306542	-0.0404284	0.624875	0.000500835	0.00161561	0.133057	Endothelial - Endothelial	Endothelial - LAMC1 - ITGA7 - Endothelial	Endothelial - LAMC1	ITGA7 - Endothelial	human
Endothelial	Endothelial	LAMC1	ITGAV	LAMC1 - ITGAV	Laminins	1.28123	0.857661	0.306542	0.117173	0.624875	0.425543	1.09886	0.211857	Endothelial - Endothelial	Endothelial - LAMC1 - ITGAV - Endothelial	Endothelial - LAMC1	ITGAV - Endothelial	human
Endothelial	Endothelial	LAMC1	ITGB1	LAMC1 - ITGB1	Laminins	1.28123	2.24898	0.306542	0.131115	0.624875	0.894825	2.88148	0.218828	Endothelial - Endothelial	Endothelial - LAMC1 - ITGB1 - Endothelial	Endothelial - LAMC1	ITGB1 - Endothelial	human
Endothelial	Endothelial	LAMC1	ITGB4	LAMC1 - ITGB4	Laminins	1.28123	0.0299009	0.306542	-0.213434	0.624875	0.0136895	0.03831	0.0465539	Endothelial - Endothelial	Endothelial - LAMC1 - ITGB4 - Endothelial	Endothelial - LAMC1	ITGB4 - Endothelial	human
Endothelial	Endothelial	LAMC2	CD151	LAMC2 - CD151	Laminins	0.106709	0.950174	-0.232009	-0.23428	0.0477462	0.476127	0.101393	-0.233145	Endothelial - Endothelial	Endothelial - LAMC2 - CD151 - Endothelial	Endothelial - LAMC2	CD151 - Endothelial	human
Endothelial	Endothelial	LAMC2	COL17A1	LAMC2 - COL17A1	Laminins	0.106709	0.00398153	-0.232009	-0.0323242	0.0477462	0.0033389	0.000424867	-0.132167	Endothelial - Endothelial	Endothelial - LAMC2 - COL17A1 - Endothelial	Endothelial - LAMC2	COL17A1 - Endothelial	human
Endothelial	Endothelial	LAMC2	ITGA2	LAMC2 - ITGA2	Laminins	0.106709	0.759539	-0.232009	0.0792726	0.0477462	0.376294	0.0810499	-0.0763682	Endothelial - Endothelial	Endothelial - LAMC2 - ITGA2 - Endothelial	Endothelial - LAMC2	ITGA2 - Endothelial	human
Endothelial	Endothelial	LAMC2	ITGA3	LAMC2 - ITGA3	Laminins	0.106709	0.214703	-0.232009	-0.363692	0.0477462	0.101169	0.0229108	-0.297851	Endothelial - Endothelial	Endothelial - LAMC2 - ITGA3 - Endothelial	Endothelial - LAMC2	ITGA3 - Endothelial	human
Endothelial	Endothelial	LAMC2	ITGA6	LAMC2 - ITGA6	Laminins	0.106709	1.31566	-0.232009	0.512845	0.0477462	0.591653	0.140394	0.140418	Endothelial - Endothelial	Endothelial - LAMC2 - ITGA6 - Endothelial	Endothelial - LAMC2	ITGA6 - Endothelial	human
Endothelial	Endothelial	LAMC2	ITGB1	LAMC2 - ITGB1	Laminins	0.106709	2.24898	-0.232009	0.131115	0.0477462	0.894825	0.239988	-0.0504471	Endothelial - Endothelial	Endothelial - LAMC2 - ITGB1 - Endothelial	Endothelial - LAMC2	ITGB1 - Endothelial	human
Endothelial	Endothelial	LAMC2	ITGB4	LAMC2 - ITGB4	Laminins	0.106709	0.0299009	-0.232009	-0.213434	0.0477462	0.0136895	0.0031907	-0.222721	Endothelial - Endothelial	Endothelial - LAMC2 - ITGB4 - Endothelial	Endothelial - LAMC2	ITGB4 - Endothelial	human
Endothelial	Endothelial	LAMC3	ITGA2	LAMC3 - ITGA2	Laminins	0.00228763	0.759539	-0.0337584	0.0792726	0.000500835	0.376294	0.00173754	0.0227571	Endothelial - Endothelial	Endothelial - LAMC3 - ITGA2 - Endothelial	Endothelial - LAMC3	ITGA2 - Endothelial	human
Endothelial	Endothelial	LAMC3	ITGA3	LAMC3 - ITGA3	Laminins	0.00228763	0.214703	-0.0337584	-0.363692	0.000500835	0.101169	0.00049116	-0.198725	Endothelial - Endothelial	Endothelial - LAMC3 - ITGA3 - Endothelial	Endothelial - LAMC3	ITGA3 - Endothelial	human
Endothelial	Endothelial	LAMC3	ITGA6	LAMC3 - ITGA6	Laminins	0.00228763	1.31566	-0.0337584	0.512845	0.000500835	0.591653	0.00300975	0.239543	Endothelial - Endothelial	Endothelial - LAMC3 - ITGA6 - Endothelial	Endothelial - LAMC3	ITGA6 - Endothelial	human
Endothelial	Endothelial	LAMC3	ITGB1	LAMC3 - ITGB1	Laminins	0.00228763	2.24898	-0.0337584	0.131115	0.000500835	0.894825	0.00514484	0.0486782	Endothelial - Endothelial	Endothelial - LAMC3 - ITGB1 - Endothelial	Endothelial - LAMC3	ITGB1 - Endothelial	human
Endothelial	Endothelial	LAMC3	ITGB4	LAMC3 - ITGB4	Laminins	0.00228763	0.0299009	-0.0337584	-0.213434	0.000500835	0.0136895	6.84021e-05	-0.123596	Endothelial - Endothelial	Endothelial - LAMC3 - ITGB4 - Endothelial	Endothelial - LAMC3	ITGB4 - Endothelial	human
Endothelial	Endothelial	LCN1	LMBR1L	LCN1 - LMBR1L	UNCAT	0	0.19583	-0.020429	0.0911645	0	0.0963272	0	0.0353678	Endothelial - Endothelial	Endothelial - LCN1 - LMBR1L - Endothelial	Endothelial - LCN1	LMBR1L - Endothelial	human
Endothelial	Endothelial	LCN2	LRP2	LCN2 - LRP2	UNCAT	0.198393	0	-0.281007	-0.027502	0.0641068	0	0	-0.154255	Endothelial - Endothelial	Endothelial - LCN2 - LRP2 - Endothelial	Endothelial - LCN2	LRP2 - Endothelial	human
Endothelial	Endothelial	LEFTY2	ACVR2B	LEFTY2 - ACVR2B	UNCAT	0.00144798	0.0650963	-0.011739	0.0257092	0.00066778	0.0322204	9.42579e-05	0.00698508	Endothelial - Endothelial	Endothelial - LEFTY2 - ACVR2B - Endothelial	Endothelial - LEFTY2	ACVR2B - Endothelial	human
Endothelial	Endothelial	LEP	LEPR	LEP - LEPR	UNCAT	0	0.59951	-0.014339	0.300645	0	0.27596	0	0.143153	Endothelial - Endothelial	Endothelial - LEP - LEPR - Endothelial	Endothelial - LEP	LEPR - Endothelial	human
Endothelial	Endothelial	LEP	LRP2	LEP - LRP2	UNCAT	0	0	-0.014339	-0.027502	0	0	0	-0.0209205	Endothelial - Endothelial	Endothelial - LEP - LRP2 - Endothelial	Endothelial - LEP	LRP2 - Endothelial	human
Endothelial	Endothelial	LGALS3BP	ITGB1	LGALS3BP - ITGB1	UNCAT	0.0683479	2.24898	-0.410963	0.131115	0.0307179	0.894825	0.153713	-0.139924	Endothelial - Endothelial	Endothelial - LGALS3BP - ITGB1 - Endothelial	Endothelial - LGALS3BP	ITGB1 - Endothelial	human
Endothelial	Endothelial	LGALS3BP	VANGL1	LGALS3BP - VANGL1	UNCAT	0.0683479	0.111158	-0.410963	0.0354107	0.0307179	0.0624374	0.00759738	-0.187776	Endothelial - Endothelial	Endothelial - LGALS3BP - VANGL1 - Endothelial	Endothelial - LGALS3BP	VANGL1 - Endothelial	human
Endothelial	Endothelial	LHB	LHCGR	LHB - LHCGR	UNCAT	0.000497613	0	-0.0116616	0	0.000500835	0	0	-0.0058308	Endothelial - Endothelial	Endothelial - LHB - LHCGR - Endothelial	Endothelial - LHB	LHCGR - Endothelial	human
Endothelial	Endothelial	LIF	IL6ST	LIF - IL6ST	Interleukins	0.0069329	1.54667	-0.0572546	0.418353	0.00116861	0.701169	0.0107229	0.180549	Endothelial - Endothelial	Endothelial - LIF - IL6ST - Endothelial	Endothelial - LIF	IL6ST - Endothelial	human
Endothelial	Endothelial	LIF	LIFR	LIF - LIFR	Interleukins	0.0069329	0.174125	-0.0572546	0.0165547	0.00116861	0.0891486	0.00120719	-0.02035	Endothelial - Endothelial	Endothelial - LIF - LIFR - Endothelial	Endothelial - LIF	LIFR - Endothelial	human
Endothelial	Endothelial	LIN7C	ABCA1	LIN7C - ABCA1	UNCAT	0.196512	0.249949	-0.00912344	-0.00430392	0.0981636	0.10985	0.0491181	-0.00671368	Endothelial - Endothelial	Endothelial - LIN7C - ABCA1 - Endothelial	Endothelial - LIN7C	ABCA1 - Endothelial	human
Endothelial	Endothelial	LIN7C	HTR2C	LIN7C - HTR2C	UNCAT	0.196512	NA	-0.00912344	NA	0.0981636	NA	NA	NA	Endothelial - Endothelial	Endothelial - LIN7C - HTR2C - Endothelial	Endothelial - LIN7C	HTR2C - Endothelial	human
Endothelial	Endothelial	LIN7C	KCNJ4	LIN7C - KCNJ4	UNCAT	0.196512	NA	-0.00912344	NA	0.0981636	NA	NA	NA	Endothelial - Endothelial	Endothelial - LIN7C - KCNJ4 - Endothelial	Endothelial - LIN7C	KCNJ4 - Endothelial	human
Endothelial	Endothelial	LIPC	LRP1	LIPC - LRP1	UNCAT	0.000121761	0.0314119	-0.0136371	-0.211875	0.000166945	0.0130217	3.82476e-06	-0.112756	Endothelial - Endothelial	Endothelial - LIPC - LRP1 - Endothelial	Endothelial - LIPC	LRP1 - Endothelial	human
Endothelial	Endothelial	LIPH	LPAR1	LIPH - LPAR1	Lysophosphatidic acid	0.0111326	0.135721	-0.188516	-0.179639	0.00250417	0.0470785	0.00151093	-0.184077	Endothelial - Endothelial	Endothelial - LIPH - LPAR1 - Endothelial	Endothelial - LIPH	LPAR1 - Endothelial	human
Endothelial	Endothelial	LIPH	LPAR2	LIPH - LPAR2	UNCAT	0.0111326	0.0070708	-0.188516	-0.0699222	0.00250417	0.00400668	7.87162e-05	-0.129219	Endothelial - Endothelial	Endothelial - LIPH - LPAR2 - Endothelial	Endothelial - LIPH	LPAR2 - Endothelial	human
Endothelial	Endothelial	LIPH	LPAR4	LIPH - LPAR4	UNCAT	0.0111326	0.00023884	-0.188516	-0.0341585	0.00250417	0.000166945	2.6589e-06	-0.111337	Endothelial - Endothelial	Endothelial - LIPH - LPAR4 - Endothelial	Endothelial - LIPH	LPAR4 - Endothelial	human
Endothelial	Endothelial	LPA	ITGAM	LPA - ITGAM	UNCAT	NA	0.000220423	NA	-0.0131065	NA	0.000166945	NA	NA	Endothelial - Endothelial	Endothelial - LPA - ITGAM - Endothelial	Endothelial - LPA	ITGAM - Endothelial	human
Endothelial	Endothelial	LPA	ITGB2	LPA - ITGB2	UNCAT	NA	0.0111766	NA	-0.176937	NA	0.00417362	NA	NA	Endothelial - Endothelial	Endothelial - LPA - ITGB2 - Endothelial	Endothelial - LPA	ITGB2 - Endothelial	human
Endothelial	Endothelial	LPA	LRP2	LPA - LRP2	UNCAT	NA	0	NA	-0.027502	NA	0	NA	NA	Endothelial - Endothelial	Endothelial - LPA - LRP2 - Endothelial	Endothelial - LPA	LRP2 - Endothelial	human
Endothelial	Endothelial	LPL	CD44	LPL - CD44	UNCAT	0	0.205523	0	-0.300826	0	0.100167	0	-0.150413	Endothelial - Endothelial	Endothelial - LPL - CD44 - Endothelial	Endothelial - LPL	CD44 - Endothelial	human
Endothelial	Endothelial	LPL	GPIHBP1	LPL - GPIHBP1	UNCAT	0	0.0955085	0	0.110712	0	0.0377295	0	0.0553559	Endothelial - Endothelial	Endothelial - LPL - GPIHBP1 - Endothelial	Endothelial - LPL	GPIHBP1 - Endothelial	human
Endothelial	Endothelial	LPL	LRP1	LPL - LRP1	UNCAT	0	0.0314119	0	-0.211875	0	0.0130217	0	-0.105938	Endothelial - Endothelial	Endothelial - LPL - LRP1 - Endothelial	Endothelial - LPL	LRP1 - Endothelial	human
Endothelial	Endothelial	LPL	LRP2	LPL - LRP2	UNCAT	0	0	0	-0.027502	0	0	0	-0.013751	Endothelial - Endothelial	Endothelial - LPL - LRP2 - Endothelial	Endothelial - LPL	LRP2 - Endothelial	human
Endothelial	Endothelial	LPL	SDC1	LPL - SDC1	UNCAT	0	0.0350433	0	-0.278519	0	0.0128548	0	-0.139259	Endothelial - Endothelial	Endothelial - LPL - SDC1 - Endothelial	Endothelial - LPL	SDC1 - Endothelial	human
Endothelial	Endothelial	LPL	VLDLR	LPL - VLDLR	UNCAT	0	0.292445	0	0.195291	0	0.139232	0	0.0976457	Endothelial - Endothelial	Endothelial - LPL - VLDLR - Endothelial	Endothelial - LPL	VLDLR - Endothelial	human
Endothelial	Endothelial	LRP1B	PLAUR	LRP1B - PLAUR	UNCAT	0.00351253	0.317464	-0.00897449	-0.206125	0.00116861	0.155593	0.0011151	-0.10755	Endothelial - Endothelial	Endothelial - LRP1B - PLAUR - Endothelial	Endothelial - LRP1B	PLAUR - Endothelial	human
Endothelial	Endothelial	LRPAP1	LDLR	LRPAP1 - LDLR	Intracellular trafficking	0.630099	0.145198	-0.0295471	-0.187777	0.32621	0.0732888	0.0914894	-0.108662	Endothelial - Endothelial	Endothelial - LRPAP1 - LDLR - Endothelial	Endothelial - LRPAP1	LDLR - Endothelial	human
Endothelial	Endothelial	LRPAP1	LRP1	LRPAP1 - LRP1	Intracellular trafficking	0.630099	0.0314119	-0.0295471	-0.211875	0.32621	0.0130217	0.0197926	-0.120711	Endothelial - Endothelial	Endothelial - LRPAP1 - LRP1 - Endothelial	Endothelial - LRPAP1	LRP1 - Endothelial	human
Endothelial	Endothelial	LRPAP1	LRP2	LRPAP1 - LRP2	Intracellular trafficking	0.630099	0	-0.0295471	-0.027502	0.32621	0	0	-0.0285245	Endothelial - Endothelial	Endothelial - LRPAP1 - LRP2 - Endothelial	Endothelial - LRPAP1	LRP2 - Endothelial	human
Endothelial	Endothelial	LRPAP1	LRP8	LRPAP1 - LRP8	Intracellular trafficking	0.630099	0.0410689	-0.0295471	-0.0807316	0.32621	0.024207	0.0258775	-0.0551394	Endothelial - Endothelial	Endothelial - LRPAP1 - LRP8 - Endothelial	Endothelial - LRPAP1	LRP8 - Endothelial	human
Endothelial	Endothelial	LRPAP1	SORL1	LRPAP1 - SORL1	Intracellular trafficking	0.630099	0.00528495	-0.0295471	-0.164317	0.32621	0.00200334	0.00333005	-0.0969322	Endothelial - Endothelial	Endothelial - LRPAP1 - SORL1 - Endothelial	Endothelial - LRPAP1	SORL1 - Endothelial	human
Endothelial	Endothelial	LRPAP1	SORT1	LRPAP1 - SORT1	Intracellular trafficking	0.630099	0.0546484	-0.0295471	-0.131244	0.32621	0.0247078	0.0344339	-0.0803955	Endothelial - Endothelial	Endothelial - LRPAP1 - SORT1 - Endothelial	Endothelial - LRPAP1	SORT1 - Endothelial	human
Endothelial	Endothelial	LRPAP1	VLDLR	LRPAP1 - VLDLR	Intracellular trafficking	0.630099	0.292445	-0.0295471	0.195291	0.32621	0.139232	0.18427	0.0828722	Endothelial - Endothelial	Endothelial - LRPAP1 - VLDLR - Endothelial	Endothelial - LRPAP1	VLDLR - Endothelial	human
Endothelial	Endothelial	LTA	CACHD1	LTA - CACHD1	UNCAT	0	0.0930769	0	0.111117	0	0.0442404	0	0.0555585	Endothelial - Endothelial	Endothelial - LTA - CACHD1 - Endothelial	Endothelial - LTA	CACHD1 - Endothelial	human
Endothelial	Endothelial	LTA	EDNRA	LTA - EDNRA	UNCAT	0	0.0186949	0	-0.166284	0	0.0048414	0	-0.083142	Endothelial - Endothelial	Endothelial - LTA - EDNRA - Endothelial	Endothelial - LTA	EDNRA - Endothelial	human
Endothelial	Endothelial	LTA	LTBR	LTA - LTBR	UNCAT	0	0.286198	0	-0.165282	0	0.153756	0	-0.0826412	Endothelial - Endothelial	Endothelial - LTA - LTBR - Endothelial	Endothelial - LTA	LTBR - Endothelial	human
Endothelial	Endothelial	LTA	TNFRSF14	LTA - TNFRSF14	UNCAT	0	0.127787	0	0.0638277	0	0.0657763	0	0.0319138	Endothelial - Endothelial	Endothelial - LTA - TNFRSF14 - Endothelial	Endothelial - LTA	TNFRSF14 - Endothelial	human
Endothelial	Endothelial	LTA	TNFRSF1A	LTA - TNFRSF1A	UNCAT	0	0.510654	0	-0.0266983	0	0.267446	0	-0.0133492	Endothelial - Endothelial	Endothelial - LTA - TNFRSF1A - Endothelial	Endothelial - LTA	TNFRSF1A - Endothelial	human
Endothelial	Endothelial	LTA	TNFRSF1B	LTA - TNFRSF1B	UNCAT	0	0.273066	0	0.177401	0	0.132721	0	0.0887007	Endothelial - Endothelial	Endothelial - LTA - TNFRSF1B - Endothelial	Endothelial - LTA	TNFRSF1B - Endothelial	human
Endothelial	Endothelial	LTBP1	ITGB5	LTBP1 - ITGB5	UNCAT	0.658256	0.172209	-0.122774	-0.0829851	0.335392	0.0863105	0.113357	-0.102879	Endothelial - Endothelial	Endothelial - LTBP1 - ITGB5 - Endothelial	Endothelial - LTBP1	ITGB5 - Endothelial	human
Endothelial	Endothelial	LTBP3	ITGB5	LTBP3 - ITGB5	UNCAT	0.279033	0.172209	-0.00654958	-0.0829851	0.136895	0.0863105	0.048052	-0.0447673	Endothelial - Endothelial	Endothelial - LTBP3 - ITGB5 - Endothelial	Endothelial - LTBP3	ITGB5 - Endothelial	human
Endothelial	Endothelial	LTB	CD40	LTB - CD40	UNCAT	0.0897431	0.244661	0.0412811	0.0978256	0.0257095	0.120367	0.0219566	0.0695533	Endothelial - Endothelial	Endothelial - LTB - CD40 - Endothelial	Endothelial - LTB	CD40 - Endothelial	human
Endothelial	Endothelial	LTB	LTBR	LTB - LTBR	UNCAT	0.0897431	0.286198	0.0412811	-0.165282	0.0257095	0.153756	0.0256843	-0.0620006	Endothelial - Endothelial	Endothelial - LTB - LTBR - Endothelial	Endothelial - LTB	LTBR - Endothelial	human
Endothelial	Endothelial	LTB	TNFRSF1A	LTB - TNFRSF1A	UNCAT	0.0897431	0.510654	0.0412811	-0.0266983	0.0257095	0.267446	0.0458277	0.00729139	Endothelial - Endothelial	Endothelial - LTB - TNFRSF1A - Endothelial	Endothelial - LTB	TNFRSF1A - Endothelial	human
Endothelial	Endothelial	LTF	GP9	LTF - GP9	UNCAT	0.00158337	NA	-0.00929212	NA	0.00066778	NA	NA	NA	Endothelial - Endothelial	Endothelial - LTF - GP9 - Endothelial	Endothelial - LTF	GP9 - Endothelial	human
Endothelial	Endothelial	LTF	GPR162	LTF - GPR162	UNCAT	0.00158337	0.0409563	-0.00929212	0.0411467	0.00066778	0.0175292	6.4849e-05	0.0159273	Endothelial - Endothelial	Endothelial - LTF - GPR162 - Endothelial	Endothelial - LTF	GPR162 - Endothelial	human
Endothelial	Endothelial	LTF	LRP1	LTF - LRP1	UNCAT	0.00158337	0.0314119	-0.00929212	-0.211875	0.00066778	0.0130217	4.97367e-05	-0.110584	Endothelial - Endothelial	Endothelial - LTF - LRP1 - Endothelial	Endothelial - LTF	LRP1 - Endothelial	human
Endothelial	Endothelial	LTF	LRP11	LTF - LRP11	UNCAT	0.00158337	0.0767339	-0.00929212	-0.100587	0.00066778	0.0430718	0.000121498	-0.0549393	Endothelial - Endothelial	Endothelial - LTF - LRP11 - Endothelial	Endothelial - LTF	LRP11 - Endothelial	human
Endothelial	Endothelial	LTF	TFRC	LTF - TFRC	Transferrin	0.00158337	0.179359	-0.00929212	-0.117193	0.00066778	0.0923205	0.000283991	-0.0632427	Endothelial - Endothelial	Endothelial - LTF - TFRC - Endothelial	Endothelial - LTF	TFRC - Endothelial	human
Endothelial	Endothelial	LY6G5C	TMEM8A	LY6G5C - TMEM8A	UNCAT	0.0722987	0.263081	0.0781325	0.0232373	0.0397329	0.134558	0.0190204	0.0506849	Endothelial - Endothelial	Endothelial - LY6G5C - TMEM8A - Endothelial	Endothelial - LY6G5C	TMEM8A - Endothelial	human
Endothelial	Endothelial	LY86	CD180	LY86 - CD180	UNCAT	NA	NA	NA	NA	NA	NA	NA	NA	Endothelial - Endothelial	Endothelial - LY86 - CD180 - Endothelial	Endothelial - LY86	CD180 - Endothelial	human
Endothelial	Endothelial	LYPD3	AGR2	LYPD3 - AGR2	UNCAT	0.00461754	0.0693414	-0.10047	-0.306879	0.00166945	0.0228715	0.000320187	-0.203674	Endothelial - Endothelial	Endothelial - LYPD3 - AGR2 - Endothelial	Endothelial - LYPD3	AGR2 - Endothelial	human
Endothelial	Endothelial	LYZ	ITGAL	LYZ - ITGAL	UNCAT	0.000292535	0	-0.0101342	-0.0123729	0.000166945	0	0	-0.0112535	Endothelial - Endothelial	Endothelial - LYZ - ITGAL - Endothelial	Endothelial - LYZ	ITGAL - Endothelial	human
Endothelial	Endothelial	MADCAM1	CD44	MADCAM1 - CD44	UNCAT	0.0326669	0.205523	-0.0103031	-0.300826	0.0108514	0.100167	0.00671382	-0.155564	Endothelial - Endothelial	Endothelial - MADCAM1 - CD44 - Endothelial	Endothelial - MADCAM1	CD44 - Endothelial	human
Endothelial	Endothelial	MADCAM1	ITGA4	MADCAM1 - ITGA4	UNCAT	0.0326669	0.0256639	-0.0103031	-0.205822	0.0108514	0.00784641	0.000838362	-0.108063	Endothelial - Endothelial	Endothelial - MADCAM1 - ITGA4 - Endothelial	Endothelial - MADCAM1	ITGA4 - Endothelial	human
Endothelial	Endothelial	MADCAM1	ITGB7	MADCAM1 - ITGB7	UNCAT	0.0326669	0.000147676	-0.0103031	-0.028311	0.0108514	0.000166945	4.82411e-06	-0.0193071	Endothelial - Endothelial	Endothelial - MADCAM1 - ITGB7 - Endothelial	Endothelial - MADCAM1	ITGB7 - Endothelial	human
Endothelial	Endothelial	MATN1	ITGA1	MATN1 - ITGA1	UNCAT	0.00225978	0.309819	-0.00776088	-0.0955117	0.00033389	0.134224	0.000700121	-0.0516363	Endothelial - Endothelial	Endothelial - MATN1 - ITGA1 - Endothelial	Endothelial - MATN1	ITGA1 - Endothelial	human
Endothelial	Endothelial	MATN1	ITGB1	MATN1 - ITGB1	UNCAT	0.00225978	2.24898	-0.00776088	0.131115	0.00033389	0.894825	0.0050822	0.061677	Endothelial - Endothelial	Endothelial - MATN1 - ITGB1 - Endothelial	Endothelial - MATN1	ITGB1 - Endothelial	human
Endothelial	Endothelial	MATN1	PTPRD	MATN1 - PTPRD	UNCAT	0.00225978	0.0417065	-0.00776088	0.0596806	0.00033389	0.0217028	9.42475e-05	0.0259598	Endothelial - Endothelial	Endothelial - MATN1 - PTPRD - Endothelial	Endothelial - MATN1	PTPRD - Endothelial	human
Endothelial	Endothelial	MBL2	CALCR	MBL2 - CALCR	UNCAT	NA	NA	NA	NA	NA	NA	NA	NA	Endothelial - Endothelial	Endothelial - MBL2 - CALCR - Endothelial	Endothelial - MBL2	CALCR - Endothelial	human
Endothelial	Endothelial	MBL2	CD93	MBL2 - CD93	UNCAT	NA	1.85847	NA	0.66672	NA	0.782638	NA	NA	Endothelial - Endothelial	Endothelial - MBL2 - CD93 - Endothelial	Endothelial - MBL2	CD93 - Endothelial	human
Endothelial	Endothelial	MDK	ALK	MDK - ALK	NEGF	1.09882	0.00144312	0.0371742	-0.012687	0.520868	0.000166945	0.00158572	0.0122436	Endothelial - Endothelial	Endothelial - MDK - ALK - Endothelial	Endothelial - MDK	ALK - Endothelial	human
Endothelial	Endothelial	MDK	GPC2	MDK - GPC2	NEGF	1.09882	0.0239409	0.0371742	-0.000674288	0.520868	0.0100167	0.0263066	0.01825	Endothelial - Endothelial	Endothelial - MDK - GPC2 - Endothelial	Endothelial - MDK	GPC2 - Endothelial	human
Endothelial	Endothelial	MDK	ITGA4	MDK - ITGA4	NEGF	1.09882	0.0256639	0.0371742	-0.205822	0.520868	0.00784641	0.0281999	-0.0843239	Endothelial - Endothelial	Endothelial - MDK - ITGA4 - Endothelial	Endothelial - MDK	ITGA4 - Endothelial	human
Endothelial	Endothelial	MDK	ITGA6	MDK - ITGA6	NEGF	1.09882	1.31566	0.0371742	0.512845	0.520868	0.591653	1.44567	0.27501	Endothelial - Endothelial	Endothelial - MDK - ITGA6 - Endothelial	Endothelial - MDK	ITGA6 - Endothelial	human
Endothelial	Endothelial	MDK	ITGB1	MDK - ITGB1	NEGF	1.09882	2.24898	0.0371742	0.131115	0.520868	0.894825	2.47122	0.0841445	Endothelial - Endothelial	Endothelial - MDK - ITGB1 - Endothelial	Endothelial - MDK	ITGB1 - Endothelial	human
Endothelial	Endothelial	MDK	LRP1	MDK - LRP1	NEGF	1.09882	0.0314119	0.0371742	-0.211875	0.520868	0.0130217	0.0345159	-0.0873506	Endothelial - Endothelial	Endothelial - MDK - LRP1 - Endothelial	Endothelial - MDK	LRP1 - Endothelial	human
Endothelial	Endothelial	MDK	LRP2	MDK - LRP2	NEGF	1.09882	0	0.0371742	-0.027502	0.520868	0	0	0.00483614	Endothelial - Endothelial	Endothelial - MDK - LRP2 - Endothelial	Endothelial - MDK	LRP2 - Endothelial	human
Endothelial	Endothelial	MDK	PTPRB	MDK - PTPRB	NEGF	1.09882	0.762608	0.0371742	0.40181	0.520868	0.377462	0.837966	0.219492	Endothelial - Endothelial	Endothelial - MDK - PTPRB - Endothelial	Endothelial - MDK	PTPRB - Endothelial	human
Endothelial	Endothelial	MDK	PTPRZ1	MDK - PTPRZ1	NEGF	1.09882	0	0.0371742	-0.0276762	0.520868	0	0	0.00474902	Endothelial - Endothelial	Endothelial - MDK - PTPRZ1 - Endothelial	Endothelial - MDK	PTPRZ1 - Endothelial	human
Endothelial	Endothelial	MDK	SDC1	MDK - SDC1	NEGF	1.09882	0.0350433	0.0371742	-0.278519	0.520868	0.0128548	0.0385061	-0.120672	Endothelial - Endothelial	Endothelial - MDK - SDC1 - Endothelial	Endothelial - MDK	SDC1 - Endothelial	human
Endothelial	Endothelial	MDK	SDC3	MDK - SDC3	NEGF	1.09882	0.0938629	0.0371742	0.0312627	0.520868	0.0504174	0.103138	0.0342185	Endothelial - Endothelial	Endothelial - MDK - SDC3 - Endothelial	Endothelial - MDK	SDC3 - Endothelial	human
Endothelial	Endothelial	MDK	SDC4	MDK - SDC4	NEGF	1.09882	0.143708	0.0371742	-0.386803	0.520868	0.0676127	0.157908	-0.174814	Endothelial - Endothelial	Endothelial - MDK - SDC4 - Endothelial	Endothelial - MDK	SDC4 - Endothelial	human
Endothelial	Endothelial	MDK	TSPAN1	MDK - TSPAN1	NEGF	1.09882	0.0187795	0.0371742	-0.225623	0.520868	0.00651085	0.0206352	-0.0942242	Endothelial - Endothelial	Endothelial - MDK - TSPAN1 - Endothelial	Endothelial - MDK	TSPAN1 - Endothelial	human
Endothelial	Endothelial	MEPE	PHEX	MEPE - PHEX	UNCAT	0.00013827	0.0642931	-0.0354922	0.055445	0.000166945	0.0347245	8.88981e-06	0.00997638	Endothelial - Endothelial	Endothelial - MEPE - PHEX - Endothelial	Endothelial - MEPE	PHEX - Endothelial	human
Endothelial	Endothelial	MFAP2	NOTCH1	MFAP2 - NOTCH1	NOTCH	0.718657	0.364756	0.165883	0.227751	0.366444	0.181135	0.262135	0.196817	Endothelial - Endothelial	Endothelial - MFAP2 - NOTCH1 - Endothelial	Endothelial - MFAP2	NOTCH1 - Endothelial	human
Endothelial	Endothelial	MFAP5	NOTCH1	MFAP5 - NOTCH1	NOTCH	0.00104949	0.364756	-0.0214734	0.227751	0.00066778	0.181135	0.00038281	0.103139	Endothelial - Endothelial	Endothelial - MFAP5 - NOTCH1 - Endothelial	Endothelial - MFAP5	NOTCH1 - Endothelial	human
Endothelial	Endothelial	MFGE8	ITGAV	MFGE8 - ITGAV	UNCAT	0.256995	0.857661	-0.189194	0.117173	0.117863	0.425543	0.220414	-0.0360108	Endothelial - Endothelial	Endothelial - MFGE8 - ITGAV - Endothelial	Endothelial - MFGE8	ITGAV - Endothelial	human
Endothelial	Endothelial	MFGE8	ITGB3	MFGE8 - ITGB3	UNCAT	0.256995	0.0218954	-0.189194	-0.0518058	0.117863	0.0135225	0.00562699	-0.1205	Endothelial - Endothelial	Endothelial - MFGE8 - ITGB3 - Endothelial	Endothelial - MFGE8	ITGB3 - Endothelial	human
Endothelial	Endothelial	MFGE8	PDGFRB	MFGE8 - PDGFRB	UNCAT	0.256995	0.0292972	-0.189194	-0.269283	0.117863	0.0106845	0.00752922	-0.229238	Endothelial - Endothelial	Endothelial - MFGE8 - PDGFRB - Endothelial	Endothelial - MFGE8	PDGFRB - Endothelial	human
Endothelial	Endothelial	MFI2	TFRC	MFI2 - TFRC	Transferrin	NA	0.179359	NA	-0.117193	NA	0.0923205	NA	NA	Endothelial - Endothelial	Endothelial - MFI2 - TFRC - Endothelial	Endothelial - MFI2	TFRC - Endothelial	human
Endothelial	Endothelial	MFNG	NOTCH1	MFNG - NOTCH1	NOTCH	0.464943	0.364756	0.309779	0.227751	0.258431	0.181135	0.169591	0.268765	Endothelial - Endothelial	Endothelial - MFNG - NOTCH1 - Endothelial	Endothelial - MFNG	NOTCH1 - Endothelial	human
Endothelial	Endothelial	MFNG	NOTCH2	MFNG - NOTCH2	NOTCH	0.464943	0.063638	0.309779	-0.265272	0.258431	0.0372287	0.029588	0.0222535	Endothelial - Endothelial	Endothelial - MFNG - NOTCH2 - Endothelial	Endothelial - MFNG	NOTCH2 - Endothelial	human
Endothelial	Endothelial	MIA	CDH19	MIA - CDH19	Cell-cell adhesion	0.00021964	0.00164259	-0.0176434	-0.0143016	0.000166945	0.00066778	3.60779e-07	-0.0159725	Endothelial - Endothelial	Endothelial - MIA - CDH19 - Endothelial	Endothelial - MIA	CDH19 - Endothelial	human
Endothelial	Endothelial	MIA	CDH7	MIA - CDH7	Cell-cell adhesion	0.00021964	0.000391078	-0.0176434	-0.0105962	0.000166945	0.000166945	8.58966e-08	-0.0141198	Endothelial - Endothelial	Endothelial - MIA - CDH7 - Endothelial	Endothelial - MIA	CDH7 - Endothelial	human
Endothelial	Endothelial	MLLT4	EPHA7	MLLT4 - EPHA7	UNCAT	NA	0.00259711	NA	-0.010377	NA	0.00066778	NA	NA	Endothelial - Endothelial	Endothelial - MLLT4 - EPHA7 - Endothelial	Endothelial - MLLT4	EPHA7 - Endothelial	human
Endothelial	Endothelial	MLLT4	EPHB2	MLLT4 - EPHB2	UNCAT	NA	0.261865	NA	0.103122	NA	0.146745	NA	NA	Endothelial - Endothelial	Endothelial - MLLT4 - EPHB2 - Endothelial	Endothelial - MLLT4	EPHB2 - Endothelial	human
Endothelial	Endothelial	MLLT4	EPHB3	MLLT4 - EPHB3	UNCAT	NA	0.00153392	NA	-0.107953	NA	0.00100167	NA	NA	Endothelial - Endothelial	Endothelial - MLLT4 - EPHB3 - Endothelial	Endothelial - MLLT4	EPHB3 - Endothelial	human
Endothelial	Endothelial	MLLT4	EPHB6	MLLT4 - EPHB6	UNCAT	NA	0.0067644	NA	-0.0257636	NA	0.0033389	NA	NA	Endothelial - Endothelial	Endothelial - MLLT4 - EPHB6 - Endothelial	Endothelial - MLLT4	EPHB6 - Endothelial	human
Endothelial	Endothelial	MLLT4	F11R	MLLT4 - F11R	UNCAT	NA	0.548178	NA	0.111019	NA	0.285142	NA	NA	Endothelial - Endothelial	Endothelial - MLLT4 - F11R - Endothelial	Endothelial - MLLT4	F11R - Endothelial	human
Endothelial	Endothelial	MLLT4	NRXN2	MLLT4 - NRXN2	UNCAT	NA	0	NA	-0.024504	NA	0	NA	NA	Endothelial - Endothelial	Endothelial - MLLT4 - NRXN2 - Endothelial	Endothelial - MLLT4	NRXN2 - Endothelial	human
Endothelial	Endothelial	MLLT4	NRXN3	MLLT4 - NRXN3	UNCAT	NA	0.00306475	NA	-0.0185162	NA	0.0033389	NA	NA	Endothelial - Endothelial	Endothelial - MLLT4 - NRXN3 - Endothelial	Endothelial - MLLT4	NRXN3 - Endothelial	human
Endothelial	Endothelial	MLLT4	PVRL1	MLLT4 - PVRL1	UNCAT	NA	NA	NA	NA	NA	NA	NA	NA	Endothelial - Endothelial	Endothelial - MLLT4 - PVRL1 - Endothelial	Endothelial - MLLT4	PVRL1 - Endothelial	human
Endothelial	Endothelial	MLLT4	PVRL2	MLLT4 - PVRL2	UNCAT	NA	NA	NA	NA	NA	NA	NA	NA	Endothelial - Endothelial	Endothelial - MLLT4 - PVRL2 - Endothelial	Endothelial - MLLT4	PVRL2 - Endothelial	human
Endothelial	Endothelial	MLLT4	PVRL3	MLLT4 - PVRL3	UNCAT	NA	NA	NA	NA	NA	NA	NA	NA	Endothelial - Endothelial	Endothelial - MLLT4 - PVRL3 - Endothelial	Endothelial - MLLT4	PVRL3 - Endothelial	human
Endothelial	Endothelial	MLLT4	PVRL4	MLLT4 - PVRL4	UNCAT	NA	NA	NA	NA	NA	NA	NA	NA	Endothelial - Endothelial	Endothelial - MLLT4 - PVRL4 - Endothelial	Endothelial - MLLT4	PVRL4 - Endothelial	human
Endothelial	Endothelial	MLN	MLNR	MLN - MLNR	UNCAT	NA	NA	NA	NA	NA	NA	NA	NA	Endothelial - Endothelial	Endothelial - MLN - MLNR - Endothelial	Endothelial - MLN	MLNR - Endothelial	human
Endothelial	Endothelial	MMP12	PLAUR	MMP12 - PLAUR	MMP	0	0.317464	-0.012817	-0.206125	0	0.155593	0	-0.109471	Endothelial - Endothelial	Endothelial - MMP12 - PLAUR - Endothelial	Endothelial - MMP12	PLAUR - Endothelial	human
Endothelial	Endothelial	MMP13	LRP1	MMP13 - LRP1	MMP	0.00292747	0.0314119	-0.0543478	-0.211875	0.000500835	0.0130217	9.19574e-05	-0.133112	Endothelial - Endothelial	Endothelial - MMP13 - LRP1 - Endothelial	Endothelial - MMP13	LRP1 - Endothelial	human
Endothelial	Endothelial	MMP1	CD44	MMP1 - CD44	MMP	0.997819	0.205523	0.153584	-0.300826	0.342237	0.100167	0.205075	-0.073621	Endothelial - Endothelial	Endothelial - MMP1 - CD44 - Endothelial	Endothelial - MMP1	CD44 - Endothelial	human
Endothelial	Endothelial	MMP1	ITGA2	MMP1 - ITGA2	MMP	0.997819	0.759539	0.153584	0.0792726	0.342237	0.376294	0.757882	0.116428	Endothelial - Endothelial	Endothelial - MMP1 - ITGA2 - Endothelial	Endothelial - MMP1	ITGA2 - Endothelial	human
Endothelial	Endothelial	MMP2	SDC2	MMP2 - SDC2	MMP	1.41334	0.0328693	0.477041	-0.223341	0.652755	0.0148581	0.0464557	0.12685	Endothelial - Endothelial	Endothelial - MMP2 - SDC2 - Endothelial	Endothelial - MMP2	SDC2 - Endothelial	human
Endothelial	Endothelial	MMP7	CD151	MMP7 - CD151	MMP	0.0126326	0.950174	-0.0914038	-0.23428	0.00701169	0.476127	0.0120032	-0.162842	Endothelial - Endothelial	Endothelial - MMP7 - CD151 - Endothelial	Endothelial - MMP7	CD151 - Endothelial	human
Endothelial	Endothelial	MMP7	CD44	MMP7 - CD44	MMP	0.0126326	0.205523	-0.0914038	-0.300826	0.00701169	0.100167	0.00259629	-0.196115	Endothelial - Endothelial	Endothelial - MMP7 - CD44 - Endothelial	Endothelial - MMP7	CD44 - Endothelial	human
Endothelial	Endothelial	MMP7	CDH6	MMP7 - CDH6	MMP	0.0126326	0.00718064	-0.0914038	-0.0595367	0.00701169	0.00350584	9.07102e-05	-0.0754703	Endothelial - Endothelial	Endothelial - MMP7 - CDH6 - Endothelial	Endothelial - MMP7	CDH6 - Endothelial	human
Endothelial	Endothelial	MMP7	ERBB4	MMP7 - ERBB4	MMP	0.0126326	0.000546417	-0.0914038	-0.0180449	0.00701169	0.00033389	6.90267e-06	-0.0547244	Endothelial - Endothelial	Endothelial - MMP7 - ERBB4 - Endothelial	Endothelial - MMP7	ERBB4 - Endothelial	human
Endothelial	Endothelial	MMP9	CD44	MMP9 - CD44	MMP	0.00260683	0.205523	-0.0606882	-0.300826	0.000500835	0.100167	0.000535765	-0.180757	Endothelial - Endothelial	Endothelial - MMP9 - CD44 - Endothelial	Endothelial - MMP9	CD44 - Endothelial	human
Endothelial	Endothelial	MMP9	EPHB2	MMP9 - EPHB2	MMP	0.00260683	0.261865	-0.0606882	0.103122	0.000500835	0.146745	0.00068264	0.0212167	Endothelial - Endothelial	Endothelial - MMP9 - EPHB2 - Endothelial	Endothelial - MMP9	EPHB2 - Endothelial	human
Endothelial	Endothelial	MMP9	ITGAM	MMP9 - ITGAM	MMP	0.00260683	0.000220423	-0.0606882	-0.0131065	0.000500835	0.000166945	5.74607e-07	-0.0368974	Endothelial - Endothelial	Endothelial - MMP9 - ITGAM - Endothelial	Endothelial - MMP9	ITGAM - Endothelial	human
Endothelial	Endothelial	MMP9	ITGB2	MMP9 - ITGB2	MMP	0.00260683	0.0111766	-0.0606882	-0.176937	0.000500835	0.00417362	2.91354e-05	-0.118812	Endothelial - Endothelial	Endothelial - MMP9 - ITGB2 - Endothelial	Endothelial - MMP9	ITGB2 - Endothelial	human
Endothelial	Endothelial	MMP9	LRP1	MMP9 - LRP1	MMP	0.00260683	0.0314119	-0.0606882	-0.211875	0.000500835	0.0130217	8.18857e-05	-0.136282	Endothelial - Endothelial	Endothelial - MMP9 - LRP1 - Endothelial	Endothelial - MMP9	LRP1 - Endothelial	human
Endothelial	Endothelial	MST1	MST1R	MST1 - MST1R	UNCAT	0.0158688	0.00444087	-0.00446975	-0.122685	0.00584307	0.00183639	7.04712e-05	-0.0635776	Endothelial - Endothelial	Endothelial - MST1 - MST1R - Endothelial	Endothelial - MST1	MST1R - Endothelial	human
Endothelial	Endothelial	MSTN	ACVR2B	MSTN - ACVR2B	UNCAT	7.73472e-05	0.0650963	-0.0101562	0.0257092	0.000166945	0.0322204	5.03502e-06	0.00777647	Endothelial - Endothelial	Endothelial - MSTN - ACVR2B - Endothelial	Endothelial - MSTN	ACVR2B - Endothelial	human
Endothelial	Endothelial	MUC2	AGR2	MUC2 - AGR2	UNCAT	NA	0.0693414	NA	-0.306879	NA	0.0228715	NA	NA	Endothelial - Endothelial	Endothelial - MUC2 - AGR2 - Endothelial	Endothelial - MUC2	AGR2 - Endothelial	human
Endothelial	Endothelial	MUC7	SELL	MUC7 - SELL	Cell-cell adhesion	NA	0.0250705	NA	0.0113233	NA	0.0128548	NA	NA	Endothelial - Endothelial	Endothelial - MUC7 - SELL - Endothelial	Endothelial - MUC7	SELL - Endothelial	human
Endothelial	Endothelial	MYOC	FZD1	MYOC - FZD1	UNCAT	NA	0.00892033	NA	-0.0801939	NA	0.00617696	NA	NA	Endothelial - Endothelial	Endothelial - MYOC - FZD1 - Endothelial	Endothelial - MYOC	FZD1 - Endothelial	human
Endothelial	Endothelial	MYOC	FZD10	MYOC - FZD10	UNCAT	NA	NA	NA	NA	NA	NA	NA	NA	Endothelial - Endothelial	Endothelial - MYOC - FZD10 - Endothelial	Endothelial - MYOC	FZD10 - Endothelial	human
Endothelial	Endothelial	MYOC	FZD3	MYOC - FZD3	UNCAT	NA	0.00990708	NA	-0.0346128	NA	0.00417362	NA	NA	Endothelial - Endothelial	Endothelial - MYOC - FZD3 - Endothelial	Endothelial - MYOC	FZD3 - Endothelial	human
Endothelial	Endothelial	MYOC	FZD4	MYOC - FZD4	UNCAT	NA	0.513609	NA	0.315249	NA	0.265442	NA	NA	Endothelial - Endothelial	Endothelial - MYOC - FZD4 - Endothelial	Endothelial - MYOC	FZD4 - Endothelial	human
Endothelial	Endothelial	MYOC	FZD7	MYOC - FZD7	UNCAT	NA	0.00815659	NA	-0.0822959	NA	0.00183639	NA	NA	Endothelial - Endothelial	Endothelial - MYOC - FZD7 - Endothelial	Endothelial - MYOC	FZD7 - Endothelial	human
Endothelial	Endothelial	NAMPT	INSR	NAMPT - INSR	UNCAT	1.4333	0.753284	0.205672	0.254728	0.67379	0.275626	1.07968	0.2302	Endothelial - Endothelial	Endothelial - NAMPT - INSR - Endothelial	Endothelial - NAMPT	INSR - Endothelial	human
Endothelial	Endothelial	NCAM1	CACNA1C	NCAM1 - CACNA1C	Cell-cell adhesion	0.000440507	0.00242105	-0.0111257	-0.0425315	0.000166945	0.00133556	1.06649e-06	-0.0268286	Endothelial - Endothelial	Endothelial - NCAM1 - CACNA1C - Endothelial	Endothelial - NCAM1	CACNA1C - Endothelial	human
Endothelial	Endothelial	NCAM1	FGFR1	NCAM1 - FGFR1	FGF	0.000440507	0.616358	-0.0111257	0.198752	0.000166945	0.319199	0.00027151	0.0938131	Endothelial - Endothelial	Endothelial - NCAM1 - FGFR1 - Endothelial	Endothelial - NCAM1	FGFR1 - Endothelial	human
Endothelial	Endothelial	NCAM1	FGFR2	NCAM1 - FGFR2	FGF	0.000440507	0	-0.0111257	-0.0193736	0.000166945	0	0	-0.0152496	Endothelial - Endothelial	Endothelial - NCAM1 - FGFR2 - Endothelial	Endothelial - NCAM1	FGFR2 - Endothelial	human
Endothelial	Endothelial	NCAM1	GFRA1	NCAM1 - GFRA1	Cell-cell adhesion	0.000440507	0	-0.0111257	-0.0179888	0.000166945	0	0	-0.0145573	Endothelial - Endothelial	Endothelial - NCAM1 - GFRA1 - Endothelial	Endothelial - NCAM1	GFRA1 - Endothelial	human
Endothelial	Endothelial	NCAM1	PTPRA	NCAM1 - PTPRA	Cell-cell adhesion	0.000440507	0.35504	-0.0111257	0.0634134	0.000166945	0.190317	0.000156398	0.0261438	Endothelial - Endothelial	Endothelial - NCAM1 - PTPRA - Endothelial	Endothelial - NCAM1	PTPRA - Endothelial	human
Endothelial	Endothelial	NCAM1	ROBO1	NCAM1 - ROBO1	Cell-cell adhesion	0.000440507	0.0938087	-0.0111257	-0.0912896	0.000166945	0.0460768	4.13234e-05	-0.0512077	Endothelial - Endothelial	Endothelial - NCAM1 - ROBO1 - Endothelial	Endothelial - NCAM1	ROBO1 - Endothelial	human
Endothelial	Endothelial	NCAM1	ROBO3	NCAM1 - ROBO3	Cell-cell adhesion	0.000440507	0.0232779	-0.0111257	-0.0110549	0.000166945	0.0138564	1.02541e-05	-0.0110903	Endothelial - Endothelial	Endothelial - NCAM1 - ROBO3 - Endothelial	Endothelial - NCAM1	ROBO3 - Endothelial	human
Endothelial	Endothelial	NCAN	CDH2	NCAN - CDH2	Cell-cell adhesion	NA	0.156731	NA	0.0599287	NA	0.090818	NA	NA	Endothelial - Endothelial	Endothelial - NCAN - CDH2 - Endothelial	Endothelial - NCAN	CDH2 - Endothelial	human
Endothelial	Endothelial	NCAN	SDC3	NCAN - SDC3	UNCAT	NA	0.0938629	NA	0.0312627	NA	0.0504174	NA	NA	Endothelial - Endothelial	Endothelial - NCAN - SDC3 - Endothelial	Endothelial - NCAN	SDC3 - Endothelial	human
Endothelial	Endothelial	NDP	FZD4	NDP - FZD4	UNCAT	0.00016278	0.513609	-0.0547103	0.315249	0.000166945	0.265442	8.36055e-05	0.130269	Endothelial - Endothelial	Endothelial - NDP - FZD4 - Endothelial	Endothelial - NDP	FZD4 - Endothelial	human
Endothelial	Endothelial	NDP	LGR4	NDP - LGR4	UNCAT	0.00016278	0.0323518	-0.0547103	-0.133146	0.000166945	0.0156928	5.26623e-06	-0.0939283	Endothelial - Endothelial	Endothelial - NDP - LGR4 - Endothelial	Endothelial - NDP	LGR4 - Endothelial	human
Endothelial	Endothelial	NGF	KIDINS220	NGF - KIDINS220	UNCAT	0.002573	0.479621	-0.0280505	0.0767257	0.000166945	0.248748	0.00123406	0.0243376	Endothelial - Endothelial	Endothelial - NGF - KIDINS220 - Endothelial	Endothelial - NGF	KIDINS220 - Endothelial	human
Endothelial	Endothelial	NGF	MAGED1	NGF - MAGED1	UNCAT	0.002573	0.579489	-0.0280505	0.0291289	0.000166945	0.305843	0.00149102	0.000539217	Endothelial - Endothelial	Endothelial - NGF - MAGED1 - Endothelial	Endothelial - NGF	MAGED1 - Endothelial	human
Endothelial	Endothelial	NGF	NGFR	NGF - NGFR	UNCAT	0.002573	NA	-0.0280505	NA	0.000166945	NA	NA	NA	Endothelial - Endothelial	Endothelial - NGF - NGFR - Endothelial	Endothelial - NGF	NGFR - Endothelial	human
Endothelial	Endothelial	NGF	NGFRAP1	NGF - NGFRAP1	UNCAT	0.002573	NA	-0.0280505	NA	0.000166945	NA	NA	NA	Endothelial - Endothelial	Endothelial - NGF - NGFRAP1 - Endothelial	Endothelial - NGF	NGFRAP1 - Endothelial	human
Endothelial	Endothelial	NGF	NTRK1	NGF - NTRK1	UNCAT	0.002573	0.000327482	-0.0280505	-0.00740047	0.000166945	0.000166945	8.4261e-07	-0.0177255	Endothelial - Endothelial	Endothelial - NGF - NTRK1 - Endothelial	Endothelial - NGF	NTRK1 - Endothelial	human
Endothelial	Endothelial	NGF	SORCS3	NGF - SORCS3	UNCAT	0.002573	NA	-0.0280505	NA	0.000166945	NA	NA	NA	Endothelial - Endothelial	Endothelial - NGF - SORCS3 - Endothelial	Endothelial - NGF	SORCS3 - Endothelial	human
Endothelial	Endothelial	NGF	SORT1	NGF - SORT1	UNCAT	0.002573	0.0546484	-0.0280505	-0.131244	0.000166945	0.0247078	0.00014061	-0.0796472	Endothelial - Endothelial	Endothelial - NGF - SORT1 - Endothelial	Endothelial - NGF	SORT1 - Endothelial	human
Endothelial	Endothelial	NID1	COL13A1	NID1 - COL13A1	Matrix (assorted)	0.967464	0.0598719	0.317613	-0.0950567	0.467279	0.0370618	0.0579239	0.111278	Endothelial - Endothelial	Endothelial - NID1 - COL13A1 - Endothelial	Endothelial - NID1	COL13A1 - Endothelial	human
Endothelial	Endothelial	NID1	ITGA3	NID1 - ITGA3	Matrix (assorted)	0.967464	0.214703	0.317613	-0.363692	0.467279	0.101169	0.207717	-0.0230395	Endothelial - Endothelial	Endothelial - NID1 - ITGA3 - Endothelial	Endothelial - NID1	ITGA3 - Endothelial	human
Endothelial	Endothelial	NID1	ITGAV	NID1 - ITGAV	Matrix (assorted)	0.967464	0.857661	0.317613	0.117173	0.467279	0.425543	0.829757	0.217393	Endothelial - Endothelial	Endothelial - NID1 - ITGAV - Endothelial	Endothelial - NID1	ITGAV - Endothelial	human
Endothelial	Endothelial	NID1	ITGB1	NID1 - ITGB1	Matrix (assorted)	0.967464	2.24898	0.317613	0.131115	0.467279	0.894825	2.17581	0.224364	Endothelial - Endothelial	Endothelial - NID1 - ITGB1 - Endothelial	Endothelial - NID1	ITGB1 - Endothelial	human
Endothelial	Endothelial	NID1	ITGB3	NID1 - ITGB3	Matrix (assorted)	0.967464	0.0218954	0.317613	-0.0518058	0.467279	0.0135225	0.021183	0.132904	Endothelial - Endothelial	Endothelial - NID1 - ITGB3 - Endothelial	Endothelial - NID1	ITGB3 - Endothelial	human
Endothelial	Endothelial	NID1	PTPRF	NID1 - PTPRF	Matrix (assorted)	0.967464	0.199618	0.317613	-0.0973673	0.467279	0.110184	0.193123	0.110123	Endothelial - Endothelial	Endothelial - NID1 - PTPRF - Endothelial	Endothelial - NID1	PTPRF - Endothelial	human
Endothelial	Endothelial	NID2	COL13A1	NID2 - COL13A1	Matrix (assorted)	0.145765	0.0598719	-0.196437	-0.0950567	0.0614357	0.0370618	0.00872723	-0.145747	Endothelial - Endothelial	Endothelial - NID2 - COL13A1 - Endothelial	Endothelial - NID2	COL13A1 - Endothelial	human
Endothelial	Endothelial	NLGN1	NRXN1	NLGN1 - NRXN1	Cell-cell adhesion	0.0236057	0	0.0465888	-0.0127067	0.0186978	0	0	0.0169411	Endothelial - Endothelial	Endothelial - NLGN1 - NRXN1 - Endothelial	Endothelial - NLGN1	NRXN1 - Endothelial	human
Endothelial	Endothelial	NLGN1	NRXN2	NLGN1 - NRXN2	Cell-cell adhesion	0.0236057	0	0.0465888	-0.024504	0.0186978	0	0	0.0110424	Endothelial - Endothelial	Endothelial - NLGN1 - NRXN2 - Endothelial	Endothelial - NLGN1	NRXN2 - Endothelial	human
Endothelial	Endothelial	NLGN1	NRXN3	NLGN1 - NRXN3	Cell-cell adhesion	0.0236057	0.00306475	0.0465888	-0.0185162	0.0186978	0.0033389	7.23456e-05	0.0140363	Endothelial - Endothelial	Endothelial - NLGN1 - NRXN3 - Endothelial	Endothelial - NLGN1	NRXN3 - Endothelial	human
Endothelial	Endothelial	NLGN2	NRXN1	NLGN2 - NRXN1	Cell-cell adhesion	0.0432583	0	0.0248993	-0.0127067	0.0190317	0	0	0.00609631	Endothelial - Endothelial	Endothelial - NLGN2 - NRXN1 - Endothelial	Endothelial - NLGN2	NRXN1 - Endothelial	human
Endothelial	Endothelial	NLGN2	NRXN2	NLGN2 - NRXN2	Cell-cell adhesion	0.0432583	0	0.0248993	-0.024504	0.0190317	0	0	0.000197646	Endothelial - Endothelial	Endothelial - NLGN2 - NRXN2 - Endothelial	Endothelial - NLGN2	NRXN2 - Endothelial	human
Endothelial	Endothelial	NLGN2	NRXN3	NLGN2 - NRXN3	Cell-cell adhesion	0.0432583	0.00306475	0.0248993	-0.0185162	0.0190317	0.0033389	0.000132576	0.00319156	Endothelial - Endothelial	Endothelial - NLGN2 - NRXN3 - Endothelial	Endothelial - NLGN2	NRXN3 - Endothelial	human
[truncated: 20,103 more rows]
